# Supplementary material for: Genome Wide Identification, Classification and Functional Characterization&nbsp;of IQD Gene Family in Diploid and Tetraploid Cotton (Gossypium)
Source: Research Square preprint supplement (doi:10.21203/rs.3.rs-166037/v1), 2021-02-08
Supplement: Supplementary file 2 [file 0d271d178ca7551bd36077ab.xlsx]

## Sheet: Gar
Genome Wide Identification, Classification and Functional Characterization Analysis of IQD gene family in Diploid and Tetraploid Cotton (Gossypium) Abdul Rehman1,2,3, Zhen Peng2, Hongge Li2, Guangyong Qin1, Yinhua Jia2，Zhaoe Pan2，Shoupu He1,2, Abdul Qayyum3 and Xiongming Du1,2*, 1Zhengzhou Research Base, State Key Laboratory of Cotton Biology, Zhengzhou University, Zhengzhou 450000, China. 2State…
Gene ID	Principle Transcript ID	Rename	Genomic	Rename	Proteins	Rename	CDS
Ga01G0605	Ga01G0605.1	GarIQD01	ATGGGTTCAGGAAACTGGCTTAGATCATTCATTTGTTTAAAGAAATATAAACCAAACAGATCCAAACAAGCAAAGGTAGTACATGTGTTTTGGAATGACGCATTAATCCAACATATTGCTCGTGTTAGACACTGCATATCACTAATATGGTCACAGACCCCATCAATACAGGTACACTCGAGTAATGAAAAATCAAATGGTGATGAAAGGGTAGAAGAACATGAGGGTCCTGAAGTGGCAGCGGCTGGGAGTTCACAAAGCAGTCCTGGAATTGCCGTTGAACAAAGAGCGGCTGCTAAAATTCAGAAGGCATTTCGGTCTTACAGGGTATTTTTAATTTTTTGCCAAATTCCAATTTCATACATATTTCCAAGTGGAATTACCTTTTAAGAGATCAAA…	GarIQD01	MGSGNWLRSFICLKKYKPNRSKQAKVHSSNEKSNGDERVEEHEGPEVAAAGSSQSSPGIAVEQRAAAKIQKAFRSYRARKAVRRLRDAGRFKNILIQGHTVKKQTTSTLCYLHSWCNVQSQIRARRICMVTEGRLKQKKMENQMKLEAKLHELEVEWCGGSETMEEILSRIQQREEAAVKRERAMAYAFSHQWRANASQYLGQASYGAGKENWGWSWIERWIAARPWEVRIHSQPIHPKKTHGRQASKSEKEMKVSASVKPCLPNGKVAPKAKNGAPSDG	GarIQD01	ATGGGTTCAGGAAACTGGCTTAGATCATTCATTTGTTTAAAGAAATATAAACCAAACAGATCCAAACAAGCAAAGGTACACTCGAGTAATGAAAAATCAAATGGTGATGAAAGGGTAGAAGAACATGAGGGTCCTGAAGTGGCAGCGGCTGGGAGTTCACAAAGCAGTCCTGGAATTGCCGTTGAACAAAGAGCGGCTGCTAAAATTCAGAAGGCATTTCGGTCTTACAGGGCAAGAAAAGCAGTCCGCCGGCTGAGAGATGCGGGGAGATTCAAGAACATATTGATACAGGGACATACAGTGAAGAAACAAACAACAAGCACGCTATGCTATTTACATTCATGGTGCAATGTCCAGTCTCAAATCCGAGCTCGGAGAATATGTATGGTTACAGAAGGC…
Ga01G1214	Ga01G1214.1	GarIQD02	ATGGGAAAATCCACTTCCTGTTTCAAACTCATCACTTGCGGCAGCGATTCCGCTGAAAAAGACGACGCCATTGATGTCCCTGAGGTAAATTACGGCTGCATTTTCCCCCTTTTTTTTGTTACTTTGCTTTGAATTAGTATTTCATCTGCTGTTTCGAATTGCATTTCACCTTTTAGTTTAATTTTTGGATTTGGTCGAGGAATGGGAGTTTGAAAACTTGTCTTACACCAGAATTTTAAGATCTGAGAATTCCTGCCTTAGCATTTTTTATCAGCAATGTCTAAGCTGCCTTTTTTAACTCTGATTATTTTCCATAATTTTTTAAATGCAAATAGTTTTCTCGGTATCAAGTTTCGGAACTCTCAAAGGTTTTTAAAATTTATCTTCTTTTAACTGGTT…	GarIQD02	MGKSTSCFKLITCGSDSAEKDDAIDVPENKRSSDKKGWSFRKRSERHRVLSNSVIQVTTTTGLKESQDSVGFEFQQQDVSVASEKTSTVQYTEEKPQLMTPKEYIEEKSQLVALKEYTEEKSHSLTPIELAEEKSQLLAPIKCTEEKSQLTPEPEESKVPEPITATTNEAEDDFSLDESVVVIIQTAIRGFLAQKELGKLKNLVKLQAAVRGHLVRRHAVGTLRCVQAIVKMQLLVRARQSQEGSYVEKLDGKHQEVNQRLQGNSATKKNLTYNSMEKLLSNRFARQLMDSTPKTKTIHFKCDSSKPNSAWSWLERWMSVSSSEKASKAELPIEQPEQKNTEDCDSPRTPAVPSENISASNEPKPHVRETMVSSESEDNLITYDAANFKFEACQPSSSS…	GarIQD02	ATGGGAAAATCCACTTCCTGTTTCAAACTCATCACTTGCGGCAGCGATTCCGCTGAAAAAGACGACGCCATTGATGTCCCTGAGAATAAGAGATCAAGTGACAAAAAGGGATGGAGTTTTCGGAAGAGATCTGAACGGCATCGAGTGCTTAGCAACTCTGTGATACAAGTAACTACCACTACAGGACTTAAGGAAAGTCAAGACTCTGTTGGTTTTGAGTTTCAACAGCAAGATGTCTCGGTTGCTTCTGAGAAAACCTCCACTGTTCAGTACACTGAAGAGAAACCTCAGCTGATGACACCAAAAGAGTACATTGAAGAAAAATCCCAGTTGGTGGCACTGAAAGAGTACACAGAAGAAAAATCTCACTCGCTGACGCCTATAGAACTTGCTGAAGAA…
Ga01G2532	Ga01G2532.1	GarIQD03	ATGGGTAAAGCTTCCAAGTGGTTCCGCAGCATCCTCGGCTTCAAAAAATCCGAACCCCATAACCAACCTTCTTCTTCTTCAAAACCAACTTCCCATAAAGACAAACGGCGTTGGAGTTTCGTCAAATCGTACCGTGAAAAAGACTCCTCCACGAACAGTAGTAATGGGAAGTTGCCGTCGTCTTCGCAGCAACTGAAAGACTCTGTTTCCTTCGTTGAAAGGAAAGGTGACAATGAAGTAACGGATCCTAGCAAGCACGCCATCGCTGTTGCTGCCGCCACTGCCGCCGTTGCCGAAGCAGCCGTTGCGGCTGCTCAAGCTGCCGCTGCAGTGGTTAGGCTCACTAGTAACGGTGGTAGGTGCGCTCGTGAATCGGCAGCGGTTCACGTTTGCAACAAC…	GarIQD03	MGKASKWFRSILGFKKSEPHNQPSSSSKPTSHKDKRRWSFVKSYREKDSSTNSSNGKLPSSSQQLKDSVSFVERKGDNEVTDPSKHAIAVAAATAAVAEAAVAAAQAAAAVVRLTSNGGRCARESAAVHVCNNNSYIAHEESSAIKIQSAFRGYLARRALRALKGLVRLQALVRGHIERKRTAEWLRRMQALLRAQARARAGRAQISESSQSSCKSSHFHHPDPATPEKFEHVSRSQGTKYEQSSMLKRNGSKSSGRTVDNQEKLHSGWYRRVDEQTWVHSTRIGPNDDEKNDKILEVDTGKPNFISKRRNLFHSTHLSLNSDLYSCSFTNSRDSHQTAPSPSSGEVQSLTPLMLSHSEAIQESPFCDAVDDNSPQFYSASSKGASSKRSPFTPAKSDG…	GarIQD03	ATGGGTAAAGCTTCCAAGTGGTTCCGCAGCATCCTCGGCTTCAAAAAATCCGAACCCCATAACCAACCTTCTTCTTCTTCAAAACCAACTTCCCATAAAGACAAACGGCGTTGGAGTTTCGTCAAATCGTACCGTGAAAAAGACTCCTCCACGAACAGTAGTAATGGGAAGTTGCCGTCGTCTTCGCAGCAACTGAAAGACTCTGTTTCCTTCGTTGAAAGGAAAGGTGACAATGAAGTAACGGATCCTAGCAAGCACGCCATCGCTGTTGCTGCCGCCACTGCCGCCGTTGCCGAAGCAGCCGTTGCGGCTGCTCAAGCTGCCGCTGCAGTGGTTAGGCTCACTAGTAACGGTGGTAGGTGCGCTCGTGAATCGGCAGCGGTTCACGTTTGCAACAAC…
Ga02G0048	Ga02G0048.1	GarIQD04	ATGGGCACTGCTAGAAACTGGTTCAACACAGTTAGAAAGAAGTTCATCAAATCATCCCACCAAAGAGATATCGTCATTCCTCATAGCGAAAATCTCAGCCAGCAGTCAATGATCAAAGAAGTTAGAGACTTCCCCAACATTTCACCTTCATCGAGATCATCATTTCAGACAAAAAATTTAACCAGAGAGGATATTGCAGCAATTAAGATCCAATCAGTTTTCAGGGGTCATCTTGTAACTACGATAACTTATATTTCTTTTTCAAACACTTTAGATGTAAACTAACCATTTCGTGTTCTCGAATGATGGACAGGCAAGACGAGCATATAGAGCATTGAGAAGCCTGGTTAAGCTGCAAGCAGTGGCCCGAGGGGCGTATGTAAGGAAACAAGTACAAAT…	GarIQD04	MGTARNWFNTVRKKFIKSSHQRDIVIPHSENLSQQSMIKEVRDFPNISPSSRSSFQTKNLTREDIAAIKIQSVFRGHLARRAYRALRSLVKLQAVARGAYVRKQVQIAMNCMHALVRLQVKVRARQLLAGTVSDRRCS	GarIQD04	ATGGGCACTGCTAGAAACTGGTTCAACACAGTTAGAAAGAAGTTCATCAAATCATCCCACCAAAGAGATATCGTCATTCCTCATAGCGAAAATCTCAGCCAGCAGTCAATGATCAAAGAAGTTAGAGACTTCCCCAACATTTCACCTTCATCGAGATCATCATTTCAGACAAAAAATTTAACCAGAGAGGATATTGCAGCAATTAAGATCCAATCAGTTTTCAGGGGTCATCTTGCAAGACGAGCATATAGAGCATTGAGAAGCCTGGTTAAGCTGCAAGCAGTGGCCCGAGGGGCGTATGTAAGGAAACAAGTACAAATAGCAATGAATTGCATGCATGCACTTGTCAGGTTACAGGTCAAGGTTCGTGCCCGCCAACTCCTCGCAGGTACAGTGAGT…
Ga02G0677	Ga02G0677.1	GarIQD05	ATGGGGAAGACTACAAGGTGGCTCAAGTCAGTTTTAGGCATGAAAAAGGAAAAAGAAAAAACCCCCATTCAGCATTCTGTTTTATACGACAAGAATGACAAGAAAACGTGGAGTTTTGCCAAGTCCGGGAAAGATGTCGACGCAAATTCTCAAACCCCATCGGCCGTCACTGATGCCGCTTGGCTTAGGTCCTACTTTGTCGAAACCGAGAAAGTGCAGAACAAACATGCCGTTGCTGTGGCTGCTGCTACAGCAGCTGCAGCCGATGCAGCTATGGCAGCAGCACAAGCTGCCGTCGCAGTCGTCAGGCTGACCAGCAATGCTAGAGCTTCTTTCTTGGCTGGAGGGAAGGAGAAGTGGGCAGCTGTTAAAATTCAAGCCGACTTTAGAGGTTACTTG…	GarIQD05	MGKTTRWLKSVLGMKKEKEKTPIQHSVLYDKNDKKTWSFAKSGKDVDANSQTPSAVTDAAWLRSYFVETEKVQNKHAVAVAAATAAAADAAMAAAQAAVAVVRLTSNARASFLAGGKEKWAAVKIQADFRGYLSRKALRALKGLVRLQALVRGYLVRKRAAATLHSMQALIRAQSAVRSQRMRRSFNKENRYHPENQPRKSIERFDEWRSEINAYDDNPKIVEIDTLKTRSRSHRFNTALSECGDDLPYQTISSPLPRLVPPRTSLPHYQNLNDFEWCFSGGDECRFATAHNTPRFGNAGRSNAPTTPTQSVCGDGYFKPYSNFPNYMTNTQSFKAKLRSYSAPKQRPESGGAKKRLSHNEIMAARNSISGVRMNKSYYQIHHQF	GarIQD05	ATGGGGAAGACTACAAGGTGGCTCAAGTCAGTTTTAGGCATGAAAAAGGAAAAAGAAAAAACCCCCATTCAGCATTCTGTTTTATACGACAAGAATGACAAGAAAACGTGGAGTTTTGCCAAGTCCGGGAAAGATGTCGACGCAAATTCTCAAACCCCATCGGCCGTCACTGATGCCGCTTGGCTTAGGTCCTACTTTGTCGAAACCGAGAAAGTGCAGAACAAACATGCCGTTGCTGTGGCTGCTGCTACAGCAGCTGCAGCCGATGCAGCTATGGCAGCAGCACAAGCTGCCGTCGCAGTCGTCAGGCTGACCAGCAATGCTAGAGCTTCTTTCTTGGCTGGAGGGAAGGAGAAGTGGGCAGCTGTTAAAATTCAAGCCGACTTTAGAGGTTACTTG…
Ga02G1673	Ga02G1673.1	GarIQD06	ATGGGGAAGAAAGTAAAATGGCTATCTTCTTTAAAGAAAGCCTTCAATCCAGAGTCAAAGGAAAAGAAAAATCAGGTTTGAAAAATTTCAATTCAGTCCATAATTCATGTTAAATTTCTGGTCAACCCACATGTACTTAAATTTTTATGTTTTCTTTGGGGTCAATTTGTGATTTTGATCCTTTTGTTATACTGAAATTTGAGGTTTGTTTAGTTTGGTATAAGGCGTCGATTATTTAGACTAATGAGATTATAAAAGGTTAAAGTACCTAGGAAGTCCCTGTATTATAGGGGCTGGATCAAATTCGTCCCTCTATTGTTAAATGAATTAATTGAGTCCCTATACTATTACAAAGAATCAAATGATACCAAATTGTAACAGAGTTAACATTTACGGCGT…	GarIQD06	MGKKVKWLSSLKKAFNPESKEKKNQILDKQVHLGPSSSNAAAPTLETVNLSPPPQPEDEKIIKPETVAEATDDDVVVAPAVPTPAAVTVVQRRLNIDSRFAGKSMEEVAVIKIQTAFRVYMAKRALRALRGLVRLKSLMEGPAVKRQVTSTLRCMQTLSRVQCQIRMRRIRMTEENQALQRQILQKHAKELVNLQMGEDWDDSLQSKEQIEASLLSKHEAAMRRERAMAYSFTHQQTWKNGSKSMNPLFMDMNNLTWGWSWLERWMAARPWEGRGVTGKEPNNDQSSVKSAHFEGEISKAYARYQLNLDNKQSPKSSQKPNRTSSHLSPSPKPPSTPSRKLKSASPSGSIIAQDDDTRSIVSAQSERNRRHSIAGSLVRDDESLASSPSLPSYMVPTKS…	GarIQD06	ATGGGGAAGAAAGTAAAATGGCTATCTTCTTTAAAGAAAGCCTTCAATCCAGAGTCAAAGGAAAAGAAAAATCAGATTTTGGATAAGCAAGTGCATTTGGGTCCTAGTAGTTCTAATGCAGCTGCACCCACATTAGAAACTGTTAATTTGTCCCCTCCACCTCAGCCGGAAGATGAGAAAATAATCAAACCCGAGACGGTTGCTGAAGCTACCGATGATGATGTTGTTGTTGCTCCAGCTGTTCCGACCCCGGCTGCTGTTACGGTCGTTCAACGCCGACTTAATATAGACTCTCGGTTCGCTGGAAAATCTATGGAGGAAGTTGCAGTGATCAAAATTCAGACAGCTTTTCGAGTTTACATGGCGAAAAGAGCATTGCGTGCTTTACGAGGACTTGTG…
Ga03G0103	Ga03G0103.1	GarIQD07	ATGGGAAAGAAAAGAAGTTGGTTTTCTGCAATCAAAAGAGTTTTCGTATCGAATTCGAAGGGGAAGCTAGATATTGTAAGTCGGTATTTCGATGTTTTTAAGGTTGAAGTCGGTTTTGTTATGTATGTGACCTATTAAGATTTATGTCCTAATAGATTGTTGTGCAGCATGTATGTCGTAAAATCGGAATATTTACGGTTTGTTTTGTTTCGATGAATCGTTTTAGGAATCGGACAAAAAGGGCGGTAAAGAAAGGAAGAAGAAAGGTCAAGCAAATTACAAGCATGGAGAAGCTAATTCCTTCATTCCCCTGTTTAGGGAACCGAGTAGTATCGAGAAAATTCTCGGGGAGGCTGAAAGAGATCGGAAACTATCGTTCCGGCCTTCAACACCACCGGA…	GarIQD07	MGKKRSWFSAIKRVFVSNSKGKLDIESDKKGGKERKKKGQANYKHGEANSFIPLFREPSSIEKILGEAERDRKLSFRPSTPPDQLRTPPFMLPRAASPRVRSQRIASPRAASPKTASSPRANSPRAASPFLPPPPRAASPRAGPPRLVRPRLEPTLRNHHASATKIQAAYRGYMARRSFRALKGLVRLQGVVRGHNVKRQTITAMKYMQLLVRVQSQIQSRRIQMLENQARRQAQFKNDKEADIGKLTFGQSETGNENWDDSLQTKEEIEARMQRKVEAVIKRERAMAYAYSHQLWKDAMKSPHTGVPNIRSGVFPWWWNWLERRLAPTDLPENQATKTFQFTPRPNSELKPSPRPQSSQFTFDNIIDIPTPKSTRSTILPTTRPMQTPTPPSKLVLQA…	GarIQD07	ATGGGAAAGAAAAGAAGTTGGTTTTCTGCAATCAAAAGAGTTTTCGTATCGAATTCGAAGGGGAAGCTAGATATTGAATCGGACAAAAAGGGCGGTAAAGAAAGGAAGAAGAAAGGTCAAGCAAATTACAAGCATGGAGAAGCTAATTCCTTCATTCCCCTGTTTAGGGAACCGAGTAGTATCGAGAAAATTCTCGGGGAGGCTGAAAGAGATCGGAAACTATCGTTCCGGCCTTCAACACCACCGGATCAACTTAGAACACCACCTTTCATGCTTCCTAGGGCTGCGTCTCCTCGTGTTCGTTCTCAAAGGATTGCCTCACCAAGGGCTGCTTCTCCGAAGACTGCTTCTTCTCCACGAGCCAATTCACCTAGAGCTGCTTCTCCGTTTCTGCCTCCA…
Ga03G1274	Ga03G1274.1	GarIQD08	ATGGGGAAGAAAGGAAAATGGTTGTCTTCACTAAAGAAAGCCTTCACCCCAGAATCCAAGGAAAAGAAAACCCAGGTCTGAAAGAAGTCCAATTCAGCTATAAATTACCCACAGTTTATTAGTCTTCAATGAGTGTTTTTAATTTTCTTTATTGCTATGTTTTTTTTCAGAAATCCAAAGAAAAGGTTTTGGGAAAGCAAGTGGATTTGGGTTCCAATGATTCTGATGCAGCCACTTTAGAAACTCTCAAGTTGTCCCCTCCTCCCCAGCCACAAGAGGTGAAATTAATCGAAGCCGAGGTTGAACCGAGCGAGCAAACTTACCCTGTGGAAGTTGCCATTGCTGCTGCTGCTGCTGTGGCTTTGGCCGCTCCAGCTGAGGCAGTTGCGGATGTCGTTC…	GarIQD08	MGKKGKWLSSLKKAFTPESKEKKTQKSKEKVLGKQVDLGSNDSDAATLETLKLSPPPQPQEVKLIEAEVEPSEQTYPVEVAIAAAAAVALAAPAEAVADVVRRQSNTGPRFAGKSNEEVAAIKIQTAFRVYLAKRALHALRGLVRLKSMMEGPIVKRQAAGTLRCMQKLSRVHCQIRLRRIRMTEENQALQRQLLQKHAKEIVNLQMGEDWDDSLQSKEQIEASLLSKHEASMRREKAMAYSFTHQQTWKNASRSMNALFMDLNNPSWGWSWLERWMAARPWEGRGMAEKEQNNDQSSVKSGRSSFGGDISKAYARYQLNLDKQSLKASQKPSRTSSLQSPSTPKPVSMPTRKLKSPSPRSSVVAPDDDMRSTVSVLSERNRRHTIGGSSVLDDESLAS…	GarIQD08	ATGGGGAAGAAAGGAAAATGGTTGTCTTCACTAAAGAAAGCCTTCACCCCAGAATCCAAGGAAAAGAAAACCCAGAAATCCAAAGAAAAGGTTTTGGGAAAGCAAGTGGATTTGGGTTCCAATGATTCTGATGCAGCCACTTTAGAAACTCTCAAGTTGTCCCCTCCTCCCCAGCCACAAGAGGTGAAATTAATCGAAGCCGAGGTTGAACCGAGCGAGCAAACTTACCCTGTGGAAGTTGCCATTGCTGCTGCTGCTGCTGTGGCTTTGGCCGCTCCAGCTGAGGCAGTTGCGGATGTCGTTCGTCGTCAATCCAACACAGGTCCACGGTTTGCTGGAAAATCTAATGAAGAAGTGGCAGCCATCAAAATTCAAACCGCTTTCCGAGTTTACCTTGCA…
Ga04G0800	Ga04G0800.1	GarIQD09	ATGGGAAAGAAAGGGAAATGGTTGTCCTCTCTAAAGAAAGCCTTCTTCTCAGAGTCCAAGGGAAAGAAAAACCAGGTTAGGATAAGTCTCGTTCAGCTAAAAATCATCTGCAGTTTCATGGTTAGCTCAGTTTTTAGTATTCTTGATTACTATGTTTCTCAGAAATCAAAAGAACATTTTTGGAGAAGAAGGTGCATCTGGATCCCACTGGTTCTGATGCAGCCAAGTTATCCCCACTTCCTCAGCCTGAAGAGGTGAAATTAATTGAACCTGAAGTTGAGCAAAGCAAGCAGACTTACCCTGTGGCAGTTGCCAATTCTGCTGCGGTTCCAGCTCTGGTTGCTCTGCAGGCCATTCGACATCAACTTAATACAGATGCTAGGTTTGCCGGAAAATCTA…	GarIQD09	MGKKGKWLSSLKKAFFSESKGKKNQKKVHLDPTGSDAAKLSPLPQPEEVKLIEPEVEQSKQTYPVAVANSAAVPALVALQAIRHQLNTDARFAGKSKEEVAAIKIQAAFRAYLAKRALRALRGLARLKSLMEGIAARRQASGSLRCMQTLSRMQCQIHARRTRMMEENQALQRQLLQKLAKEIVNLQMGEDWDDSVRSKEQIEASLLSKHEAAMRRERTMAYSFTHQQTWKNASRSMNPLFMDPSNPSWGWSWMERRMTARPWEVRGGMRDREHLDDQSSLKSARSNFGGEISKAYARQPKAKPNFKPPIPSTPKSASIPARKLKSASPRSGVAGLDDETRSIVSMKSDRNRRHSIAGSSVRDNESLANSPSLPSYMVPTKSARAKTSLQSPLGPETNG…	GarIQD09	ATGGGAAAGAAAGGGAAATGGTTGTCCTCTCTAAAGAAAGCCTTCTTCTCAGAGTCCAAGGGAAAGAAAAACCAGAAGAAGGTGCATCTGGATCCCACTGGTTCTGATGCAGCCAAGTTATCCCCACTTCCTCAGCCTGAAGAGGTGAAATTAATTGAACCTGAAGTTGAGCAAAGCAAGCAGACTTACCCTGTGGCAGTTGCCAATTCTGCTGCGGTTCCAGCTCTGGTTGCTCTGCAGGCCATTCGACATCAACTTAATACAGATGCTAGGTTTGCCGGAAAATCTAAGGAGGAAGTGGCGGCAATCAAAATTCAAGCAGCTTTCCGAGCTTACCTTGCAAAAAGGGCATTGCGTGCTTTAAGAGGACTGGCTAGGTTGAAATCACTGATGGAAGGG…
Ga04G1168	Ga04G1168.1	GarIQD10	ATGGGAAAAAAAGGTGGCTGGCTTTCTATTGTGAAGAAAGCTTTGAGCCCTGAATCCAAGAAATCTCAGGTTTCAATGATTTAATTCATAATTTAATGGATTTCTTTTTTCGGTTTGGGTTTTCTTAGATTTGTTGTTTTTAATTAATTTCAGCACCAAACTCCAAAGGCAAAGAAAAAATGGTTCGGAAAAAGCAAAGATTTGAGCCCTGTGTCTGTGCCTGAAGAAACTGAAGTGATAACTGAAGATGTAAAGCTAAAAGAAGCTGAAAACGAACAAAGCAAACATGCCTACTCTGTGGCTCTTGCCACCGCTGTGGCGGCCGAGGCAGCGGTGGCAGCTGCTCAGGCGGCTGCTGAAGTTGTCCGTCTCACTTCTCAGCCGCGCCATCTGGGGAAG…	GarIQD10	MGKKGGWLSIVKKALSPESKKSQHQTPKAKKKWFGKSKDLSPVSVPEETEVITEDVKLKEAENEQSKHAYSVALATAVAAEAAVAAAQAAAEVVRLTSQPRHLGKSKEEIAAIRIQTAFRGYLARRALRALRGLVRLKSLIRGQSVKRQATTTLRCMQTLARLQSEISARRIRMSEENQALQRQLQQKCQKELEKLRAPMREDWNDSTQSKEQIEARQHNKQGATMKRERALAYAYCHQRSWKNCSRSVNQTFMDPSNSHWGWSWLERWMAARPWEVQSTTDNNDRGSVKSMGACSISISEISRAYSRKDLNNDNKPSPTPQKSSRVPSRQSPSTPPSKAPSISSVSGKTRLPSPRGSQWGGYEDSRSILSTRSDRYRRHSIAGSSMRDDESLTSSPAV…	GarIQD10	ATGGGAAAAAAAGGTGGCTGGCTTTCTATTGTGAAGAAAGCTTTGAGCCCTGAATCCAAGAAATCTCAGCACCAAACTCCAAAGGCAAAGAAAAAATGGTTCGGAAAAAGCAAAGATTTGAGCCCTGTGTCTGTGCCTGAAGAAACTGAAGTGATAACTGAAGATGTAAAGCTAAAAGAAGCTGAAAACGAACAAAGCAAACATGCCTACTCTGTGGCTCTTGCCACCGCTGTGGCGGCCGAGGCAGCGGTGGCAGCTGCTCAGGCGGCTGCTGAAGTTGTCCGTCTCACTTCTCAGCCGCGCCATCTGGGGAAGTCAAAGGAGGAAATAGCTGCTATCAGGATTCAAACAGCATTTCGTGGATATTTGGCTAGGAGGGCACTGCGAGCTTTGAGAGGG…
Ga04G2047	Ga04G2047.1	GarIQD11	ATGGGTGCCTCAGGAAAATGGTTTAAATCGCTCATAACTTTCAAACCACTTCAAGATCCTACTAATCAAGTAACTTCACACTAGGTTTACCTCTTTTTTCTTTCTTCTTTTTATTTATGCTTTCATGGTTTCATTTTTCTGTTAATTGGGTTTGTAGGAGAAGGTGGGAGATAAGACGAAGAAGAAGTGGAGGCTATGGAGGAGCTCATCCGAAGGGTTGGGATCCACCGCATCAAAGGTTCCCAGGATGCGCCACGTGGCTGCTTCAGAGGCCTCTGATTCATCTTTGTTGGTGGATGATGTGCTCGCTTCAGCTATGGCTACTGTTGCTCGTGCTCCACCCAAAGATTTCAGAGCTGTCAAGCGGGAATGGGCCGCTATTCGAATCCAGACCGCATT…	GarIQD11	MGASGKWFKSLITFKPLQDPTNQEKVGDKTKKKWRLWRSSSEGLGSTASKVPRMRHVAASEASDSSLLVDDVLASAMATVARAPPKDFRAVKREWAAIRIQTAFRALLARRALRALKAVVRIQAIFRGRQVRKQAAVTLRCMQALVRVQARVRAQCVTSSEGQAMPKLMDEDPAKQAERGWCDSLGTLEELKAKQQMRQQGAIKRERAIAYSVLKQSRSCASPNARANKQPYSHNHQRLDRNSPDWNWLDRWMATKPWETRAMDEGTEPAEKVMMMNTISRKSEDNNFSFHSSSYEHEPLKVKRNNVTTRILARPPTSMQTSGSLSAPSSESVYDETSTSTSSASPTTLSSNTPVAGTLEDNHAQKPSYMNPTESIKAKQKNTFRFSPDNVRRRHVVDD…	GarIQD11	ATGGGTGCCTCAGGAAAATGGTTTAAATCGCTCATAACTTTCAAACCACTTCAAGATCCTACTAATCAAGAGAAGGTGGGAGATAAGACGAAGAAGAAGTGGAGGCTATGGAGGAGCTCATCCGAAGGGTTGGGATCCACCGCATCAAAGGTTCCCAGGATGCGCCACGTGGCTGCTTCAGAGGCCTCTGATTCATCTTTGTTGGTGGATGATGTGCTCGCTTCAGCTATGGCTACTGTTGCTCGTGCTCCACCCAAAGATTTCAGAGCTGTCAAGCGGGAATGGGCCGCTATTCGAATCCAGACCGCATTTCGAGCCTTGCTGGCAAGACGAGCTTTAAGGGCCTTGAAAGCAGTAGTGAGGATTCAAGCTATATTCCGGGGTCGTCAAGTCCGAAAG…
Ga05G0277	Ga05G0277.1	GarIQD12	ATGGGGAGAGCTTCAAGGTGGCTGAAGAGCTTGTTTGGGATAAAGAACAGCAAAAACAGCTTCAATCCCAGAGACGGGAAAGACAAGAAAAACGGCAGCATTGAACATTCAGTGGGTGATTCAAGCATTTCCCCAGAAAAGGTTGCGTGGTTAAGATCGTGCTATAATGAAACAGAGAGGGAGCAGAACAAGCACGCCATTGCTGTGGCTGCCGCCACTGCTGCTGCTGCGGATGCAGCAGTAGCCGCCGCGCAGGCTGCAGTGGCGGTGGTGAGACTGACTAGTCATGGTAGAGGGACCATGTTTGGTGGTGTACATGAGAAGTGGGCTGCTGTCAAGATTCAAACAGTTTTTAGAGGTTATCTGGTAAGTAAGTAGAGTTTTTATTTCTTAATTTAT…	GarIQD12	MGRASRWLKSLFGIKNSKNSFNPRDGKDKKNGSIEHSVGDSSISPEKVAWLRSCYNETEREQNKHAIAVAAATAAAADAAVAAAQAAVAVVRLTSHGRGTMFGGVHEKWAAVKIQTVFRGYLARKALRALKGLVKIQALVRGYLVRKQASATFHSMQALMRAQATIKSQKARAIINNDAIRFDIRARKSMERFDDTRSEHTVSIHSRRLSASLDIDESPKIVEVDTGIKPKARSRRTNTSISDFIDDHTYQTLPSPLPCRCPARLSIPDSRHYQDIDWGFSGDECRFSTAHSTPRFINSCAPATPAKSVSGHNFFRPCGDSPNYMANTQSFKAKLRSHSAPKQRPEPGPKKRLSLNEMMESRSSLSGVKMQRSCSRAQEAIHFKNAVMGKLDRSLEFGK…	GarIQD12	ATGGGGAGAGCTTCAAGGTGGCTGAAGAGCTTGTTTGGGATAAAGAACAGCAAAAACAGCTTCAATCCCAGAGACGGGAAAGACAAGAAAAACGGCAGCATTGAACATTCAGTGGGTGATTCAAGCATTTCCCCAGAAAAGGTTGCGTGGTTAAGATCGTGCTATAATGAAACAGAGAGGGAGCAGAACAAGCACGCCATTGCTGTGGCTGCCGCCACTGCTGCTGCTGCGGATGCAGCAGTAGCCGCCGCGCAGGCTGCAGTGGCGGTGGTGAGACTGACTAGTCATGGTAGAGGGACCATGTTTGGTGGTGTACATGAGAAGTGGGCTGCTGTCAAGATTCAAACAGTTTTTAGAGGTTATCTGGCTCGAAAAGCATTACGAGCTTTGAAAGGATTG…
Ga05G0830	Ga05G0830.1	GarIQD13	ATGGGTGTCTCAGGAAAATGGATCAAAGCACTAGTGGGCTTGAAGAAATCAGAAAAGTCTCAATCTTCAGAGAAAGTAGAAAATGTTAGTTTGAATGTTGCGAATTTTTTTTGCCCTTCTGTAGGTTTAGATTTGGCTTCATGCTTGTGTCACAGCCCACACACAATATCCTGGCCTGTGACATGTACATCATGGCACGTGTGCCTCTTCAAAATGCTGAAGTATTATCAAATGTCAGAAAGTATCTTCTGTGCGCACTTGTAGCTAGATGATCATGTTTTTGGAGTAATGCATTTTTCGTTGACTTATGGCTTAGCTGAGTTGTTGACTAATCCGGTACATACAAGGAGTATTATGTAGTAACTTACATGCAGTAGCTTTCCTTGTTAGCCTAATCAA…	GarIQD13	MGVSGKWIKALVGLKKSEKSQSSEKVENRATGSKFRHRRKHSVEFDTNELQEELDENAASLAENATCATIDAAGCPSDALEVHDAPLNEHAREEWAATRIQTAFRGFLARRALRALKGLVRLQALVRGHAVRKQAAITLRCMQALVRVQARVRARRVRLALENQTAQQKLQQQLANEAHVKEIEEGWCDSIGSVEEIQAKLLKRQEAAAKRERAMAYALAHQWQAGSRQQSVPAGFEPDKSSWGWNWLERWMAVRPWENRFLDINLRDGVKIREDSPAEGKNDASSQIKPAIGKPAASSLHANLSNKKTGPSHFDGSDSPPGKSACVLEAVNAPSSKPKSKPNREDSVEEAGSGPVISSRSHSNPKERRTQSDKQAKRRLSMPNTGGGIVSQTTKLSKT…	GarIQD13	ATGGGTGTCTCAGGAAAATGGATCAAAGCACTAGTGGGCTTGAAGAAATCAGAAAAGTCTCAATCTTCAGAGAAAGTAGAAAATAGAGCAACTGGTAGCAAATTTCGTCACCGAAGAAAGCATTCGGTTGAGTTTGATACAAATGAACTTCAAGAAGAGTTGGATGAGAATGCTGCTTCACTAGCTGAAAATGCTACTTGTGCAACTATAGATGCTGCTGGCTGTCCTTCTGATGCACTTGAAGTGCATGATGCACCTCTTAATGAACATGCAAGGGAAGAATGGGCTGCCACGAGGATACAAACTGCTTTCCGAGGATTTCTGGCCAGAAGAGCACTGCGAGCATTAAAAGGATTGGTAAGACTGCAGGCCCTTGTCAGGGGTCATGCTGTAAGAAAA…
Ga05G1403	Ga05G1403.1	GarIQD14	ATGGGGAAAGCTGCAAGGTGGCTGAAGGGGTTATTGGGCATGAAAAAGGAGAAAGATAAAGACCGGATAGAGCAATATTCATCTGTTTTATCCGATAAAAAAGAGAGGAAAAGATTTAGTTTTGGCAAATCCAGCAAAGGTGTCAGTGAAATTTCTCAGAGTCCAAGCAATGTTTCCACGACTACAGATGCTGCTTGGCTCAGATCCTACATTGCTGAAACTGAGAAAGACCAAAACAAGCATGCAATTGCAGTGGCTGCTGCCACCGCAGCTGCAGCTGATGCCGCCGTGGCCGCAGCAAAGGCGGCAATGGCAGTGGTGAAGCTAACCAGTAATGGACGAACCAGTTTGGTTGGTGGAGGGAGGGAAAGGTGGGCAGCTATGAAAATTCAAAGCGTC…	GarIQD14	MGKAARWLKGLLGMKKEKDKDRIEQYSSVLSDKKERKRFSFGKSSKGVSEISQSPSNVSTTTDAAWLRSYIAETEKDQNKHAIAVAAATAAAADAAVAAAKAAMAVVKLTSNGRTSLVGGGRERWAAMKIQSVFRGYLSRKALRALKGLVRLQALVRGYLVRKRTIATLHSMQALLRAQTTVRSQRIHRSFNKDHSCCLEHKPRSSIERFDEPRSVIHSKRLSASMETNAYDDSPKIVEIDTFKTRSRSRRFNLNALSECGDDFASHTNTSPLLCPVPVRTSTPHHQNVDDFEWCFADDECRLSTAQSTPRFANPVRTPIAPATPLSVCGEGYFRRPHSNLPNYMAKTQSFKAKLRSHSAPKQRPEPGTKKRLSLNGLMAARNSISGVRMNTSCYQVDE…	GarIQD14	ATGGGGAAAGCTGCAAGGTGGCTGAAGGGGTTATTGGGCATGAAAAAGGAGAAAGATAAAGACCGGATAGAGCAATATTCATCTGTTTTATCCGATAAAAAAGAGAGGAAAAGATTTAGTTTTGGCAAATCCAGCAAAGGTGTCAGTGAAATTTCTCAGAGTCCAAGCAATGTTTCCACGACTACAGATGCTGCTTGGCTCAGATCCTACATTGCTGAAACTGAGAAAGACCAAAACAAGCATGCAATTGCAGTGGCTGCTGCCACCGCAGCTGCAGCTGATGCCGCCGTGGCCGCAGCAAAGGCGGCAATGGCAGTGGTGAAGCTAACCAGTAATGGACGAACCAGTTTGGTTGGTGGAGGGAGGGAAAGGTGGGCAGCTATGAAAATTCAAAGCGTC…
Ga05G1446	Ga05G1446.1	GarIQD15	ATGGGTGCCTCAGGAAAATGGTTTAGATCACTTGTTACTTTGAAACCACTTCATGAACCCATTAACCATGTATTTTTCTTCAATCCCATAACTAAGTTTCTAATTTTCTGGAACTCCTTTTTTTTCTTCGTGCTTTCAGTGTTTTTATTTTTTATAATTTTTTTTTGTAGGAGAAAATGGGAGATAATAAGTCCAAGAAGAAATGGAAACTATGGAGGAGCTCATCAGAAGGGTTCGGATCCTCCTCATCCAAGAGTTACAAAATGCGGCACGTGGTAGCTGGTCCACAGGCCTCCGATTCTTCTTTCATAGCTGATGATCTGCTTGCCGCTGCCATGGCTACCATTGTTCGTGCTCAACCCAAAGATTTCAGAGCTGTGAAGCGTGAATGGGCCGCCA…	GarIQD15	MGASGKWFRSLVTLKPLHEPINHEKMGDNKSKKKWKLWRSSSEGFGSSSSKSYKMRHVVAGPQASDSSFIADDLLAAAMATIVRAQPKDFRAVKREWAAIRIQTAFRGLLARRALRALKAVVGIQAIFRGRLVRKQAAVTLRCMQALVRVQARVRAQCLVSSEEQSLHKLDDPTKEAEKGWCDIPGTLEEVKAKQQMRQQGAKKRERAMAYSVSRSYGNGSPNFRANKQQPLSRRHHQRLHRDNPDWDWLDRWMSTKPWETRTIEEPDSTVSRKSEDNIVSFHSNSSDQRDSLKRKTKNPKTSILTRPANQTSGSTSAPSSESVYDKSSTSTSTASVSPTTLSSNTIVVGTLNDSNHTQKPSYMNPTESIKAKQKTLKFSSSDNMRRHVVDDDDDDDLQ…	GarIQD15	ATGGGTGCCTCAGGAAAATGGTTTAGATCACTTGTTACTTTGAAACCACTTCATGAACCCATTAACCATGAGAAAATGGGAGATAATAAGTCCAAGAAGAAATGGAAACTATGGAGGAGCTCATCAGAAGGGTTCGGATCCTCCTCATCCAAGAGTTACAAAATGCGGCACGTGGTAGCTGGTCCACAGGCCTCCGATTCTTCTTTCATAGCTGATGATCTGCTTGCCGCTGCCATGGCTACCATTGTTCGTGCTCAACCCAAAGATTTCAGAGCTGTGAAGCGTGAATGGGCCGCCATTCGAATTCAGACTGCATTTCGCGGCTTGCTGGCAAGACGAGCTTTGAGGGCATTGAAAGCAGTAGTAGGGATTCAAGCCATATTCCGTGGTCGTCTAGTC…
Ga05G1676	Ga05G1676.1	GarIQD16	ATGGGTTCTGGAAACTTGTTCAAGTCAATAATAAATATAGTGAAAGATGACAACTCAAAGAAAGTAAAGGTACATTCTCAAACAGTCATAAACTAAGCTATGCAAGTCTCTACATTCCAGTTATAAATAAACCTAAGATTGCTTCTCTAGTCATTGATTTGCAATTTGAATCCTTGGGTTAATATTATCTATGATATCGTCTGTTTGGCACAGGGATCTTCTGCTTCTAAAAAATCCAGTGGCTTCAAATGGAAGAAACAACAGCAAAAGGCATCCACTAGACCGGGTCTAATTAGCGGAAATTCCAATACTCTTGGCATGCCAATTGAGGACTTGGCAGCTACTAGGATTCAAACTGCATTCAGGGCTTATAGAGTATGTTGGTTTGGAGGTTCTACA…	GarIQD16	MGSGNLFKSIINIVKDDNSKKVKGSSASKKSSGFKWKKQQQKASTRPGLISGNSNTLGMPIEDLAATRIQTAFRAYRARKQLRRLKGIIRLQAQTLNSSIKKQATTTLNYLHSWSNIQAQIRARRLCMVTEGHLRQKKIANQIKLEAKLHDIEVEWSCGPETMEEILTKIHNREEAAVKRERTMAYAFSHQWRAPNSNNNGIGNYELAKANWGWSWVERWIAVRPWESRLPAQSITPKKLQNKQINKAGKNSSSPKPKPKPHFSNEKETMKMKPRRLSYPGAEKPAARQQSTKAEEENNKKEERVV	GarIQD16	ATGGGTTCTGGAAACTTGTTCAAGTCAATAATAAATATAGTGAAAGATGACAACTCAAAGAAAGTAAAGGGATCTTCTGCTTCTAAAAAATCCAGTGGCTTCAAATGGAAGAAACAACAGCAAAAGGCATCCACTAGACCGGGTCTAATTAGCGGAAATTCCAATACTCTTGGCATGCCAATTGAGGACTTGGCAGCTACTAGGATTCAAACTGCATTCAGGGCTTATAGAGCTCGAAAACAATTACGTCGATTGAAAGGTATTATAAGATTGCAGGCTCAAACCCTAAATAGTTCCATCAAAAAGCAAGCTACAACAACATTAAATTATCTTCACTCGTGGAGCAACATACAGGCTCAAATAAGAGCCCGTCGACTCTGTATGGTAACAGAAGGCCAT…
Ga05G1990	Ga05G1990.1	GarIQD17	ATGGGAAAATCCACTTCCTGTTTCAAAATCATCACTTGCGGCGGCGATTTTGCTGAGAACAACGACGTTATTCATGTTCCTGAGCCTGAGGTATATAAATAAATATCCTTTTCGCCTTTACGGCTGCCATTTTTTTTTTTTTTTGTGTTTTGCGTTGGATTAGGATTTCACCTTCCGACTTTGCATTTGAGGTTTCAGTTCGAAACAGTCAATGCATTGTTTAATTTATGGATTTACTTGAGGAATCGGAGTTTAAACTTGCCTTACTCCACTACTTTAAGATCTGACTACTCTTGGCTTCGCATATTTATCAGCAATGTCCAAGCTGCCTTTTAAATCCGATTACTTTCACAACTTATATAATGCAAATGTTTTTTAGTTTCTGGTTTCAAATATAGC…	GarIQD17	MGKSTSCFKIITCGGDFAENNDVIHVPEPEIKKSNDKKGWSFRKRSERHRVLSNTVIQEATSGLKESPESAGFNFQQPDASIIPEETSTIEYSEEKPQALTPKEHIEEESKCVASKGYPEKKSQLLIPEGSKVPEPVASTTNEAEDDANLDESVVVIIQTAIRGFLAHKELGQLKNLVKLQAAVRGHLVRRHALGTLRCIQAIVKMQVLFRARLSQEGSYDEKKRDGKHCGENQSLERSAIKQNATYTSIENLLSNRFARKLMDSTQKTKPIRIKCDPSKPNSAWSWLERWMSVSLSKRPSTTELSIEQPEREKSDNCDFQVTTTVPESFPESNEPKLYVRETLVSSESEENLIAHDAANSKFEACQTTSSTVMDDLEQPQIDNSTSDIKEGEENLIIY…	GarIQD17	ATGGGAAAATCCACTTCCTGTTTCAAAATCATCACTTGCGGCGGCGATTTTGCTGAGAACAACGACGTTATTCATGTTCCTGAGCCTGAGATTAAGAAATCAAATGACAAAAAGGGATGGAGTTTTAGAAAGAGATCTGAACGGCATCGGGTGCTTAGCAACACTGTTATACAAGAAGCTACTTCTGGACTTAAGGAAAGCCCGGAATCTGCCGGTTTTAATTTTCAACAGCCTGATGCATCCATTATTCCTGAAGAAACCTCCACCATTGAATACAGTGAAGAGAAACCTCAGGCGCTGACACCAAAGGAGCACATTGAAGAAGAATCTAAGTGTGTGGCATCAAAAGGATACCCTGAAAAAAAATCTCAGTTGTTGATTCCAGAGGGCTCAAAAGTT…
Ga05G3216	Ga05G3216.1	GarIQD18	ATGGGCAAAAAAAGAGATTGGTTTTGGTTTGTGAAGAAAGCTTTGACCCCTGAGTCCAAGAAAGATCAGGTAAAAGGTTTGCACAATTTAAGATTTTTTTATAATTAAAAAATTATTTATAAGATGAATTGTTTTGAACAAATTAATATTTTATTTTAAAAAGGGCGAGGCTAAAGTGTCAAGGCAACATCCTTTTTCACCCAACTTTTACTCTCTCTCTTTTTTAAAATTTTTAAATTTTTTATATAGTTTAGTTTTATAATTTTATAGTCATAGATGTGGTATAATTTTGAATTTCATACCTCTATTTTATGAAAACTAGAAGTTAATTCATTTATTTTAATTTATCATATTTTGATCTTTGCATGTTTGGGATTTAGAAAATTAATCAAATTATTT…	GarIQD18	MGKKRDWFWFVKKALTPESKKDQESSKSKKKWQSKTKDSGPAVPLPQETETETKTEEPELPPPADAKPAEAENEPKKHTYFVALATAMAAAAAVAASKATAEAVRVASLQRILSERTAATKIQTAFRGYLARRALPELRRSERLKSMIEGQSVKEQAKTALRCMQTKGGLQSRIRRMRFRMLEENQILHHHLQQKRHKEHDKFNASMGGEWHDGRKSKEQSEAIKQYKQEAAMRRERGLAYAFTRQRSWKVTSKAANQTLMDQNTPHWGWSWLERWMAARPWDIPCSSTNNASVNTLASSSISNNDNKPSPTPSKPTPPPPSKIPSFSSLSSQIRQPSPRGTRPGGYECSTPDRDRRRQSSIGGFSSAKDDKSVGSSAEKAPSWMKQVRTSQLSSSLRH…	GarIQD18	ATGGGCAAAAAAAGAGATTGGTTTTGGTTTGTGAAGAAAGCTTTGACCCCTGAGTCCAAGAAAGATCAGGAAAGTTCAAAATCAAAGAAAAAATGGCAAAGCAAAACCAAGGATTCCGGGCCTGCAGTTCCTTTGCCTCAAGAAACTGAAACGGAAACAAAAACTGAAGAGCCTGAACTTCCTCCCCCTGCAGATGCCAAACCAGCGGAAGCTGAAAATGAGCCTAAAAAACACACCTACTTCGTCGCTCTTGCCACCGCTATGGCTGCTGCCGCCGCGGTCGCAGCTTCTAAGGCGACTGCTGAGGCTGTTCGCGTCGCTTCTTTACAACGCATATTGTCGGAGAGAACGGCTGCTACCAAGATTCAAACTGCATTTCGCGGATACTTGGCTCGGAGG…
Ga06G0060	Ga06G0060.1	GarIQD19	ATGGGAAGATCCATTTCCTGTTTCAAAATCATCACTTGCGGCACTGTTTCAGCTGATAAAAACGAAGACTTTATCGATGTTCCTCAGGTATATGTTTTATCCTTAGCCTTTACGGCGGCTGTTCGTTGGATTTAAGATTTCATGGTTTTTTTTTTTTTTGTAATTGATGTTTTTAGTTGCTTCAAATGAAGTTTTTAGAGGAAGCGAAGCTTTAGAACTTGACATCTTACACTATTTTGAGATCCGATTGCTTCCACAGTTTATGAATTGAAAATGTTTATTTTTCAGCTGCAGTTTCCAAATCTAACAAGTTTTTTAAGGTCAAATTGTATAGAATGTCTCTGTACTATGTGATTTTTATGGATTTAGTCCCTATACTATAATTTGATCATTTCTTGG…	GarIQD19	MGRSISCFKIITCGTVSADKNEDFIDVPQDKRSSEKKGWSFRKRSERHRVLSNTVVQEASTGLEESPEAASYVQQSDVSDAPEKTSTVQYTEEKLQPVAPKDYVEEKSQLSTQEDSKVPEPVVAATNEAKDDANMDESDVVVVQTAIRGFLARKELGKLKNLVKLQAALRGHLVRRHAVGTLRCIQAIVKMQMLVRARHARLSQEGSYSEKNAASTSIEKLLSNRFARQLLDSTPKTKPIHINCDPSKPSSGWSWLERWMSTSSSEKTSTAELPNEQPRDSPLDATVPSEAISESNDVNKTMVSSESEENLITHVAADSKSEACLPTSSVTGDLERTRIDNMSTSDLKETSLDQTIETEAHCLDVGVESLDAVSSGADTISRSKEPNITENPVLRDRKG…	GarIQD19	ATGGGAAGATCCATTTCCTGTTTCAAAATCATCACTTGCGGCACTGTTTCAGCTGATAAAAACGAAGACTTTATCGATGTTCCTCAGGACAAGAGATCGAGTGAAAAAAAAGGATGGAGTTTCCGTAAGAGATCTGAACGGCATCGGGTGCTTAGCAACACTGTGGTACAAGAAGCTTCTACTGGACTGGAGGAAAGTCCTGAAGCTGCTAGTTATGTTCAACAGTCCGATGTCTCCGATGCTCCTGAGAAAACCTCCACTGTTCAGTACACCGAAGAGAAACTTCAGCCAGTAGCACCAAAAGATTACGTTGAAGAAAAATCTCAATTATCGACCCAAGAGGACTCGAAAGTGCCCGAACCTGTTGTTGCTGCCACAAATGAGGCTAAAGATGATGCT…
Ga06G1947	Ga06G1947.1	GarIQD20	ATGGCTAAGAAAAAGAGCTGGTTCAGTCTAGTGAAGAAGTTTTTTCTCTTTGAGACAATTGCAAGAACAGAGAAGGTAACGTTTTTTTTTTGCTATTTACTGCTGTTTCCCAGGTTTTTTTTTTTCTTTTTCTTTATCCTTTATGAATGGATGTTATCTATTTGTCAGAAGGAGAAAAAAAGGAAATGGATGTTTGGAACGTTAAGGACCAAGAGGTTGACAGCACCACCAAAGGACGTGACAAAGGATGAGCATGTAACTGTGGCTATTACCACACCTGCTGCCCCCGAAGCAGGTGTTGCAGCCGCTCAGGTTGCGGCCGAGGTTGTTCCACCCTATGGTACCCTTCATTCTAACCATATATGTGATGGAAAAACAGATGAACGAGCCCTGGATGTT…	GarIQD20	MAKKKSWFSLVKKFFLFETIARTEKKEKKRKWMFGTLRTKRLTAPPKDVTKDEHVTVAITTPAAPEAGVAAAQVAAEVVPPYGTLHSNHICDGKTDERALDVQELAATKIQATFRGYLARKALRALKGIVRLQAIIRGSAVRRQAMNTLKCLQSIVNIQSQVSAMRFQMAEGTWQYDETKQLVTLEDKIIKVDINSQRRWDDSILTKEEAEAMVLSRKEAAIKRERIKEYSYVHRKSAESELNKGNGRLKYWLDEWVDTQVTKSKELEDLDSVWTSNRKPMEENRAKHLRLKTSPRPYHYNSEGLESPVVPVPRRSFHKKQCSLGEDNSFPTSPVVPPYMAATQSARAKVRSLSSPKVRPGSFETQSESYSPYKNKLCLISSITSEVPSSYKMSGSRSS…	GarIQD20	ATGGCTAAGAAAAAGAGCTGGTTCAGTCTAGTGAAGAAGTTTTTTCTCTTTGAGACAATTGCAAGAACAGAGAAGAAGGAGAAAAAAAGGAAATGGATGTTTGGAACGTTAAGGACCAAGAGGTTGACAGCACCACCAAAGGACGTGACAAAGGATGAGCATGTAACTGTGGCTATTACCACACCTGCTGCCCCCGAAGCAGGTGTTGCAGCCGCTCAGGTTGCGGCCGAGGTTGTTCCACCCTATGGTACCCTTCATTCTAACCATATATGTGATGGAAAAACAGATGAACGAGCCCTGGATGTTCAAGAACTTGCTGCCACAAAAATCCAAGCTACCTTTCGGGGCTACCTGGCAAGGAAAGCTTTGCGGGCGCTGAAGGGGATAGTGAGGCTTCAA…
Ga06G2219	Ga06G2219.1	GarIQD21	ATGGGCAAAAAAGGAAGCTGGTTTACTGCTGTGAAGAAAGTTTTAAGCCTTGAACCCAACAAAGATGAGGTTTCATTTTCAATTATTTTATTTCATAATCTAATTGTTTTTTATTTAATTTTTTGTAATTTTTTTTATTTCACCAGAAGATTCAAAAATCCAAGAAAAATGGGGTTAAATTACCTGAAAAGATCAAAGGAAGCAAACGTGCTAACTGGTTCGCTCCGGCCACCACCATGGTGACCGGCGCGTTGGTTCGCCTTACTTTGTCGCCACACTACTTGGGAAAATCAATGGAGGAAATAGCTACTGTTAAGATTCAAACTGTTTTTCGAGGATACTTGGTATCAAATTTCTTCCACTTATTATTATTATTTTTTTATAATTTTAAACTTCTTA…	GarIQD21	MGKKGSWFTAVKKVLSLEPNKDEKIQKSKKNGVKLPEKIKGSKRANWFAPATTMVTGALVRLTLSPHYLGKSMEEIATVKIQTVFRGYLARKALRDLRGLERLKSLIQGQSVKRQATITLRCMRTLARVQSQTRTRQLRMSEQNRALQKHLQTKYEKQLQNSKSYMGEDWNVSTKSKEQMQAKQQYRQVAAMRRERALAYSFTHQRSWKVTCRSMNHTFMDPFNPKWSWSWLERWMSTRPWEIQNAPDNNDHGPSKSVGAEITKAKSQSDVNNDHNKRSSTLAKPIRPPNRRSSSTPPSKTHSISSKKGLQSPSPTRIQLPDRYKRHSIGGLSLERDDEVFANSPPSNKIPARSSSKDRSRPPSINRNPVNTRRHSGPPKVDIFPN	GarIQD21	ATGGGCAAAAAAGGAAGCTGGTTTACTGCTGTGAAGAAAGTTTTAAGCCTTGAACCCAACAAAGATGAGAAGATTCAAAAATCCAAGAAAAATGGGGTTAAATTACCTGAAAAGATCAAAGGAAGCAAACGTGCTAACTGGTTCGCTCCGGCCACCACCATGGTGACCGGCGCGTTGGTTCGCCTTACTTTGTCGCCACACTACTTGGGAAAATCAATGGAGGAAATAGCTACTGTTAAGATTCAAACTGTTTTTCGAGGATACTTGGCGAGGAAGGCATTGCGAGATTTGAGAGGGTTAGAGAGGTTGAAATCATTGATACAAGGGCAATCCGTGAAACGACAAGCCACTATTACGTTACGATGCATGCGGACACTTGCTCGAGTGCAGTCCCAAACT…
Ga07G0098	Ga07G0098.1	GarIQD22	ATGGGAAAAGCTACAAGGTGGCTAAAGAGCTTATTTGGGATAAAGAACAACAAAGAATGCCCAAGTTCCGGTGACCGTAAAGATAAGAAACGGTGTAGCATTGGCCATTCAGGGCGGGAATCAAGTGGCGGATTATGTCACAACCCTACAACGATACCACCAAATATATCACCGGCAGAGGTGGTGTGGCTGAGATCATTCTACAATGAAACGGAGAAAGAGCAGAATAAGCACGCAATTGCGGTGGCAGCTGCCACGGCTGCTGCTGCAGATGCCGCTGTCGCCGCCGCTCAGGCAGCTGTGGCGGTGGTGAGGCTTACGAGTCATGGAAGAGGTACCATGGTCGGCGGTGGTGGACACGAAAAGTGGGCTGCCATTAAGATTCAATCCGTTTTCAGA…	GarIQD22	MGKATRWLKSLFGIKNNKECPSSGDRKDKKRCSIGHSGRESSGGLCHNPTTIPPNISPAEVVWLRSFYNETEKEQNKHAIAVAAATAAAADAAVAAAQAAVAVVRLTSHGRGTMVGGGGHEKWAAIKIQSVFRGYLAKKALRALKGLVKIQALVRGYLLRKQASATLHGMQALIRAQATIRSQKARKSMEQFDDTRSERTVSFHSRRLSASLDTLNIEESPKIVEIDTGRPKSRSRRTNTSVSDFGDDPSFQILSSSVPSRVPARLSVPDSHTDWGLTGDECRFSTAQSTPRFINCCVSNAPVTPAKSVCADNFFRHYGIGNLNFPNYMANTQSFKAKLRSHSAPKQRPEPGPKKRLSLVETTESRSSLSGARMQRSCSQAQEAISFKNVVMGKLDRSL…	GarIQD22	ATGGGAAAAGCTACAAGGTGGCTAAAGAGCTTATTTGGGATAAAGAACAACAAAGAATGCCCAAGTTCCGGTGACCGTAAAGATAAGAAACGGTGTAGCATTGGCCATTCAGGGCGGGAATCAAGTGGCGGATTATGTCACAACCCTACAACGATACCACCAAATATATCACCGGCAGAGGTGGTGTGGCTGAGATCATTCTACAATGAAACGGAGAAAGAGCAGAATAAGCACGCAATTGCGGTGGCAGCTGCCACGGCTGCTGCTGCAGATGCCGCTGTCGCCGCCGCTCAGGCAGCTGTGGCGGTGGTGAGGCTTACGAGTCATGGAAGAGGTACCATGGTCGGCGGTGGTGGACACGAAAAGTGGGCTGCCATTAAGATTCAATCCGTTTTCAGA…
Ga07G0751	Ga07G0751.1	GarIQD23	ATGGGAAAATCTCCCGGAAAATGGATTAAGACTGTGCTTTTTGGAAAGAAACCTTCCAAATCTAGTTATCCTAAAGGAAGGGAGGTAATATTTTACTGCTAATTACTACTAAACAGAAAATATCATGTTATTTATATTTGAAAGCAGTGGTAAATTCTTGTTTGCAATGCTGTTAATTAGAGTTTCCTATAAGCTAGATAGGGGACAGATCCATAATCGGGGCTGTTGCCACCATTGAGATCCTAAAGGCCCTAGGAGAGTTGGAGTATATTTAATAAATAGCTAGATTTTACGTATACCCCACTGAAATTGAAAAGAAAAATGATATGCATATTACATGTTTATAAATGTTTATTGATTTGCTTTGCAAAATAATAAGGTCTAATTAGAAATCCTATC…	GarIQD23	MGKSPGKWIKTVLFGKKPSKSSYPKGREKVDNDSQVLVAARASESDLAVAPPFSSQLNPHTTERDERRLELENKETANISHDDETSLPMSQDIDSLKFTLQDSPSNPERIKHEQSATLVQAAFRGYLARRAFWALKGIIRLQALIRGHLVRRQAISTLCCMMGIVKLQACVRGQMVRHSDCVHELQKKCNQINLLESKLVVSLGFNMPSHIGKLSGHAFVRKLIASSPTVMPLRLRYDVGEPNSVWIWLERWSASCFWKPVPQPKKISNTKFQKKKVNGQTVGMDTGRAKRSVRRIPSSNMDSTSVQATSEFDKPKCNPRKIFGHPAGPVQENPQNELEKVKRNLRKVHNPVVEHSLQSEFEFEKLKSLEKVSSTPDLDIVEESLKRSAEKTSKEAAMT…	GarIQD23	ATGGGAAAATCTCCCGGAAAATGGATTAAGACTGTGCTTTTTGGAAAGAAACCTTCCAAATCTAGTTATCCTAAAGGAAGGGAGAAGGTTGACAATGACAGCCAGGTATTGGTTGCAGCCAGGGCATCAGAAAGTGATTTGGCTGTGGCTCCTCCCTTCTCTTCACAGCTCAATCCTCATACTACTGAGAGAGATGAAAGGAGATTAGAATTGGAGAACAAGGAAACTGCAAATATCTCACATGATGATGAGACATCACTGCCAATGAGTCAAGACATAGATTCTCTGAAGTTCACTCTTCAGGATTCACCTTCTAATCCTGAAAGGATAAAGCACGAACAATCGGCGACCCTGGTGCAGGCTGCTTTTAGGGGTTACCTGGCTCGCCGAGCATTCTGG…
Ga08G1130	Ga08G1130.1	GarIQD24	ATGGGAAAGAAAGGGAGTGGATGGTTCTCTACGGTGAAGAAAGTGTTCAAGTCTTCATCTAAGGACTTGCCCGAGAAAAAGGTAACTGATTTTTGTTGTTGTTTGGTTTTGGATTTCTTTGCTTAATTTCTAGGCAACCGATCAAAGGTGTTTATGTTGGCATCTTTCAAGATTTTCTTTTTTTCAGATTTTCATTTTAAGGCAGACTTAAAAAAAAAAAAAAAACAAAACAAAACCAAAATCCAAAACATTCTGGATTATGTTTCTTTCAGTTAGGGGTGCTTACCCTTTTCCTATCTGCACATGGTTAGCTCTTAGCTGGGTATCTTACATGCCCATTATTCATAAGTCATCTGTTACAAAACTAGATTTATCTAACTTTTCCTACATATTTAAAAT…	GarIQD24	MGKKGSGWFSTVKKVFKSSSKDLPEKKEESVEKWPNEAPEVVSFEHFPAESSPDITKDESETSTPNKDRDHAIAVALATAAAAEAAVAAAQAAAKVVRLAGYRRHSMEERAATLIQSYYRGYLARSALRALKGLVRLQALVRGYNVRKQAQNTMRCMQALVRVQARVRARRLQLTQEKLQKRVDDDEDDNEEEKRGMEELKLERKPKSPLNKYDSWDGENVNGCASKKHDAVMRRERALAYAYSYQEEQRQHHEQLLMQPQHNGKDGGVYLNEREKAQWGWNWLECWMSSQPYPARQLGLQEGAYMALPRATTTTDNMSEKTVEMDVVTPIKSGSYLTQQQLQSDSSSVPSYMVTTQSAKAKVRSQGSAKQQRGPYVPEWNSSTKKASGCDSSTSGGDQ…	GarIQD24	ATGGGAAAGAAAGGGAGTGGATGGTTCTCTACGGTGAAGAAAGTGTTCAAGTCTTCATCTAAGGACTTGCCCGAGAAAAAGGAAGAGAGTGTTGAGAAATGGCCGAATGAGGCCCCGGAAGTAGTGTCATTTGAACATTTTCCGGCAGAGAGTTCACCAGACATCACTAAGGATGAGAGTGAAACGTCAACTCCGAACAAAGATAGGGACCACGCCATTGCTGTGGCCTTGGCAACCGCTGCTGCAGCAGAAGCTGCTGTTGCTGCTGCTCAAGCAGCGGCTAAAGTTGTTCGATTGGCTGGTTATAGACGCCACTCTATGGAAGAAAGAGCTGCAACTCTTATACAGTCGTATTATAGAGGCTACCTGGCTCGGAGTGCTTTGCGAGCTTTGAAGGGA…
Ga08G1206	Ga08G1206.1	GarIQD25	ATGGGCCTTTTCCGGCGACTCTTTGGCGCCAAGAAGCCTACCCAACCCCGCCCCGACGAAGACAGGAGGCGTTGGAGCTTTAACAGATCTTCCCATCCTACGTCTTCGACTTCTCATCTTGATGCCCTTTCTGGTCCAGGCAATGGCACATTGGATGCCAACAAGCGCGCCATAGCAGTAGCAGCCGCCACTGCTGCTGTAGCTGAGGCTGCTCTGGCAGCAGCGCATGCGGCTGCCGAGGTTGTTAGGCTGACAAGTGGTGGTGTTGGAAGCGCCGATGGGAGCAACCGACGCCTCCCACAAGAACTGGCGGCTGTTAAGATACAGTCCGCTTTTCGAGGTTATCTGGTTAGTTTTTTCTTCTGTTCTAAATTTTATCTTATTCTTGCTTGAACTTTG…	GarIQD25	MGLFRRLFGAKKPTQPRPDEDRRRWSFNRSSHPTSSTSHLDALSGPGNGTLDANKRAIAVAAATAAVAEAALAAAHAAAEVVRLTSGGVGSADGSNRRLPQELAAVKIQSAFRGYLARRALRALKALVKLQALVRGHIVRKQTADMLRRMQTLVRLQARARASRSYMTKSFYSTCKISHSRHARCGSNSNLMDTINLEKARMGLNWLDNWMEESLRNNHRDSPLIHRHADDEKSDKILEVDTWKPNLNCPPCNRNFRTSQHGSAFDYNQTYMAYDSPRKQSGKGSNRIPDNFSAEVLPLSSLKHPGRKDEVILRTADIDNSPQVLSASSSRPGSSARRSPFASSECSWGYLSGFSVHPNYMANTESFRAKYRSQSAPRQRLEFEKYGSNRRTFQGLWES…	GarIQD25	ATGGGCCTTTTCCGGCGACTCTTTGGCGCCAAGAAGCCTACCCAACCCCGCCCCGACGAAGACAGGAGGCGTTGGAGCTTTAACAGATCTTCCCATCCTACGTCTTCGACTTCTCATCTTGATGCCCTTTCTGGTCCAGGCAATGGCACATTGGATGCCAACAAGCGCGCCATAGCAGTAGCAGCCGCCACTGCTGCTGTAGCTGAGGCTGCTCTGGCAGCAGCGCATGCGGCTGCCGAGGTTGTTAGGCTGACAAGTGGTGGTGTTGGAAGCGCCGATGGGAGCAACCGACGCCTCCCACAAGAACTGGCGGCTGTTAAGATACAGTCCGCTTTTCGAGGTTATCTGGCACGGAGGGCACTGAGGGCATTGAAAGCATTGGTGAAGCTTCAAGCACTG…
Ga08G1227	Ga08G1227.1	GarIQD26	ATGGGGAAGATTGGAGGAAACTCTTGGTTGACTGCAGTCAAGAAAGCCTTTAGGTCTCCTACTAAGGAAAACGATAAGAGGAGCTGTAGAAGGAGAGAAGATGGTGAACAAGAGGAAGAAGAGAAGGTTATTATTCTCTCTTCAACTTTTCCTTTTTCTCTTGAATGTTTTTGTTTGTGCATGTGATTAACTTTAACTCAATGTTCTTTTTCTTGGTTTGCGCAGAAAAGAGGGAAACGAAGATGGATTTTCAAGAAGCCTTCGTATCAGGAAACAGTGATACAACACAGTGAAGCAAGCACCATAGTCACAATAACCAATGCTAAAGTTGCCACTAATTCAGAAACCTCAGCACTGAATACCGTTCCCGAAGCTGAGCAAAGATCACATGCCATTGCA…	GarIQD26	MGKIGGNSWLTAVKKAFRSPTKENDKRSCRRREDGEQEEEEKKRGKRRWIFKKPSYQETVIQHSEASTIVTITNAKVATNSETSALNTVPEAEQRSHAIAVAIATTAAAQAAVATAQAAVEVVRLTRPSVFLREHFAAIVIQTAFRGYLAKRALRALKGLVKLQALVRGHNVRKRANITLRCMEAMARVQARVRDQRKRLSVHERSMDSIFSDHRTNTLWSSYLADKNSIYSREESKYDDDWRTHWDEHPKTLKEIQAILQKTKQATMKREKALAQAFSNQIWTGDRNTVESEDEVDGKTRWVDRWTTRKQWESTGRMSSDHIDPIKTNPNSQYHYQQRRPSSFSVASPLHKTINGLPIRSITPSPSKAKPLQIYSASPRYLKEERFPPSPAHTPNTGS…	GarIQD26	ATGGGGAAGATTGGAGGAAACTCTTGGTTGACTGCAGTCAAGAAAGCCTTTAGGTCTCCTACTAAGGAAAACGATAAGAGGAGCTGTAGAAGGAGAGAAGATGGTGAACAAGAGGAAGAAGAGAAGAAAAGAGGGAAACGAAGATGGATTTTCAAGAAGCCTTCGTATCAGGAAACAGTGATACAACACAGTGAAGCAAGCACCATAGTCACAATAACCAATGCTAAAGTTGCCACTAATTCAGAAACCTCAGCACTGAATACCGTTCCCGAAGCTGAGCAAAGATCACATGCCATTGCAGTGGCTATTGCTACTACAGCAGCTGCTCAAGCAGCAGTAGCAACCGCACAAGCTGCTGTAGAAGTAGTTCGGCTCACCAGGCCTTCCGTTTTCTTGAGA…
Ga08G2108	Ga08G2108.1	GarIQD27	ATGGACAAAGCCTCCAAGTGGTTCCGCAGTATCCTCGGTCTCAAAAGAAGAGACTCCCACAAACAACCACCTTCTTCCAAACGTCGTTGGAGTTTCGTTAAATCCTACCGCGAGAAGGACTCCTCCGCCGTCTCCACTGCAACGTCGTCCCTACGCGGTCTTCAGCAACCACTCGAAGATTCTGTTTCTGTTGTTGACGCGAATAGTGGGTATGATGCAGTGGATGATAATAACGACCATGCCATTGCTGTGGCTGCCGCTACTGCCGCCGTTGCCGAAGCAGCCGTTGCGGCTGCTCAAGCTGCCGCTGTGGTGGTTAGGCTCACCGGAAGCAGTGGTAGGTGCGCGCGTGATCCGGTGGCTCACGTTAGCAACAGCTACTGGGCAGGCAAGGAATTA…	GarIQD27	MDKASKWFRSILGLKRRDSHKQPPSSKRRWSFVKSYREKDSSAVSTATSSLRGLQQPLEDSVSVVDANSGYDAVDDNNDHAIAVAAATAAVAEAAVAAAQAAAVVVRLTGSSGRCARDPVAHVSNSYWAGKELAAVKIQSTFRGYLARRALRALKGLVKLQALVRGHIERKKTAEWLRRMQVFLQTQARARAGRAQISESSRISSKSSHYLHPGPPTPENFEHAVQPKSTKYEQSSMLKRNGSRLSGRTRDNYEQMHPGWYTSDHWIDDQSWDQRGHSTRIGHTDDEKNDKILEVDIGKPRFTSKRRNLFHSTHLALNSDLYGCSFTNSRDSHQTAPTPLSEVQSLNLLKFPHEVEESPFCTADNSPDFHSASSKGGSSMRSPFTPAKSDGSRSYLSGY…	GarIQD27	ATGGACAAAGCCTCCAAGTGGTTCCGCAGTATCCTCGGTCTCAAAAGAAGAGACTCCCACAAACAACCACCTTCTTCCAAACGTCGTTGGAGTTTCGTTAAATCCTACCGCGAGAAGGACTCCTCCGCCGTCTCCACTGCAACGTCGTCCCTACGCGGTCTTCAGCAACCACTCGAAGATTCTGTTTCTGTTGTTGACGCGAATAGTGGGTATGATGCAGTGGATGATAATAACGACCATGCCATTGCTGTGGCTGCCGCTACTGCCGCCGTTGCCGAAGCAGCCGTTGCGGCTGCTCAAGCTGCCGCTGTGGTGGTTAGGCTCACCGGAAGCAGTGGTAGGTGCGCGCGTGATCCGGTGGCTCACGTTAGCAACAGCTACTGGGCAGGCAAGGAATTA…
Ga08G2857	Ga08G2857.1	GarIQD28	ATGGGAAAAGCTACAAGGTGGTTGAAGAGCTTATTTGGGATAAAGAACAGCAAAGACTACTTGAATTCCGGTGACCGGAAAGGAAAAAAAGGGTCTAGCATTGGCCGTTCGGGGAGGGATCCCAGCGGCGGATTGTGTCACAGCGTTACAGCGACACCACCACCAAACATGTCACCGGCAGAAGTGTCTATGTGGATAAGGTCATACTACAATGAAACGGAGAAGGAACAAAACAAACACGCAATCGCCGTAGCGGCCGCCACGGCAGCGGCTGCCGATGCTGCGGTGGCCGCGGCTAAAGCAGCTGTGGCGGTCGTGAGGCTGACAAGTCACGGAAGGGGAACCATGTTCGGGCACGAGAGATGGGCTGCTGTTAAAATTCAAACCGCGTTTCGAGGT…	GarIQD28	MGKATRWLKSLFGIKNSKDYLNSGDRKGKKGSSIGRSGRDPSGGLCHSVTATPPPNMSPAEVSMWIRSYYNETEKEQNKHAIAVAAATAAAADAAVAAAKAAVAVVRLTSHGRGTMFGHERWAAVKIQTAFRGYLARRALRALKGLVKIQALVRGYLVRKQATIRSHKANRFDIRARKSMERLYSFNHTTNGIDENSKIVEVVDIVRPKSRSRRNVNASESDFGDDYQPVHRTLSSPFLSRVPARISIPDGGRDWGLTGDEYRFCTAQNTPRVISSCGSNSNASVPPKSVCSDNWFRHYGNFPNYMANTQSFKAKLRSQSAPKQRPELGPRKRLSLDEMMESRCSLSGVRLQRWCSQV	GarIQD28	ATGGGAAAAGCTACAAGGTGGTTGAAGAGCTTATTTGGGATAAAGAACAGCAAAGACTACTTGAATTCCGGTGACCGGAAAGGAAAAAAAGGGTCTAGCATTGGCCGTTCGGGGAGGGATCCCAGCGGCGGATTGTGTCACAGCGTTACAGCGACACCACCACCAAACATGTCACCGGCAGAAGTGTCTATGTGGATAAGGTCATACTACAATGAAACGGAGAAGGAACAAAACAAACACGCAATCGCCGTAGCGGCCGCCACGGCAGCGGCTGCCGATGCTGCGGTGGCCGCGGCTAAAGCAGCTGTGGCGGTCGTGAGGCTGACAAGTCACGGAAGGGGAACCATGTTCGGGCACGAGAGATGGGCTGCTGTTAAAATTCAAACCGCGTTTCGAGGT…
Ga08G2909	Ga08G2909.1	GarIQD29	ATGGGTGCTTCAGGGAAATGGGTAATATCTCTTATTGGTCTCAAAAAAACCCAAAAACAACACCAAGTAAGCTCTGGGTTTTCTATGTTATTCCACCGTAAAAATATTTATATACATTTTAAAGATTTAAAGCTCTTTCCTTTTTGTGTGTTTATGTAGGAGAAAGTGAATAGCAACAAGAAATGGAAGCTATGGAGAAAGTTTAGATCAGATTCTCAAAGCTCTGATTCTTTCATTGCTGCCATGGCCGCCATTGTTCGAGCTCCTTATAAAGATTTCAGTTTTTTAAAGCAAGAATGGGCTGCCATTCGCATTCAAACAGCTTTTCGTGGCTTCTTGGTAAAGTTGAAGTCTTTTTTTTTTTTTTCCTTTACATGTTTGGTATCCGAGAAAGTGATG…	GarIQD29	MGASGKWVISLIGLKKTQKQHQEKVNSNKKWKLWRKFRSDSQSSDSFIAAMAAIVRAPYKDFSFLKQEWAAIRIQTAFRGFLARRALRALKGIVRLQALVRGRQVRKQASVTLRCMQALVRVQARVRARRVRMSIEGQAVRKMLDGHRSKDDVLKQAEDGWCGSKGTLEDVKTKLHMREKGTFKRERTLAYSLAQKQWKSVPGSTTRTNGLIPCLISQEFDKNSWGWNWLERWMVARPWETRLMEQSTRTDPSKTCLESLSGKNEICSEPCSMKARKNNVTTRVSAKPPPHTRQVTRSSSSPGSEFRFDESSGSSSICTSTTPVSGTTVLPSDATGDSGNSRPNYMTMTVSTKAKQRSGNHGFQRQSMDELEFKRSAGFDNGDSKSCAGSDPSVRMSRP…	GarIQD29	ATGGGTGCTTCAGGGAAATGGGTAATATCTCTTATTGGTCTCAAAAAAACCCAAAAACAACACCAAGAGAAAGTGAATAGCAACAAGAAATGGAAGCTATGGAGAAAGTTTAGATCAGATTCTCAAAGCTCTGATTCTTTCATTGCTGCCATGGCCGCCATTGTTCGAGCTCCTTATAAAGATTTCAGTTTTTTAAAGCAAGAATGGGCTGCCATTCGCATTCAAACAGCTTTTCGTGGCTTCTTGGCAAGGAGAGCATTGAGGGCTTTAAAAGGAATTGTGAGGCTACAAGCTTTGGTTCGAGGTAGACAAGTTCGGAAACAAGCCTCGGTGACGCTTCGATGCATGCAAGCTCTCGTTCGTGTTCAAGCTCGAGTCAGGGCTCGTCGTGTTCGAATG…
Ga09G1182	Ga09G1182.1	GarIQD30	ATGGGTGTCTCAGGAAAATGGATCAAAGCATTGGTTGGCTTGAAAAGAACAGACAAGTCACAATCCTTGGAGAAGAAAGAAAATGTCAGTATGACTAACTATATATATTCTAAACAGTTTCTCCTATTTTGGAGGTTTAGATTGGGTATGTTATTGTGTAATATCATGTGTGCCTCTTCAAAATGAAGTGATGTCTTATTGTCTCAAGTTATCTGGTACAATGGAAAGGGGTGTTTTATGGGAACTTACATGCAGCAATTCTCCTTGTTAGTCAAAAGAAATATATGATTTTGTTCTCTTCAGCCATCCTAGTCAATGAAGCTTTATGTCATTATCAGAATAATTGCACCTTTTGTTATGCTTCTTTCTATTCATCTAGTCTTATTGTGGCTTGTAGAA…	GarIQD30	MGVSGKWIKALVGLKRTDKSQSLEKKENRAATSKFHHRRKHSIEFDTDKLQEELDQNAASPARDANTHAIADAAGFPSGSLEVRDVALNELVMEEWAATRIQTAFRGFLARRALRALKGLVRLQALVRGHAVRKQAAMTLRCMQALVRVQARVRARRVRLTLESETAQQKLQQQLADEARVKEIEEGWCDSIGSVEEIQAKLLKRQEAAAKRERAMAYALAHQWQAGSRQQSVPAGFESDKSSWGWNWLERWMAVRPWENRFLDINLRDGAVACEDGSAEGKNGANSQIKPATKKPAASNLHANLSNLKVGPSYSEGSDSPPGKSANVVDAVNALSSKPKSKPIIEDLGEEAGSKPVFTSRSRSNPKERSIKSDKLVKKRLSLPNSGEGTGSQTSKPGK…	GarIQD30	ATGGGTGTCTCAGGAAAATGGATCAAAGCATTGGTTGGCTTGAAAAGAACAGACAAGTCACAATCCTTGGAGAAGAAAGAAAATAGGGCAGCTACTAGCAAATTTCATCACCGAAGGAAGCATTCCATTGAGTTTGACACAGATAAACTTCAAGAAGAGTTGGATCAGAATGCTGCTTCACCAGCCAGAGATGCTAATACTCATGCAATTGCAGATGCTGCTGGCTTCCCCTCTGGTTCACTTGAAGTGCGTGATGTAGCTCTTAATGAACTTGTAATGGAAGAATGGGCTGCCACAAGGATACAAACAGCTTTCCGTGGGTTTCTGGCTAGAAGAGCACTCCGAGCCTTAAAAGGATTGGTCAGACTGCAGGCCCTGGTGAGGGGTCATGCTGTAAGA…
Ga09G1374	Ga09G1374.1	GarIQD31	ATGGGAAAGAAAAGGTGCTGGTTTAGTTGGGTGAAGAAGATATTCGCTTCTGATGCAAAACCAAAACCGGAAAAGGTTCATTTTTAACTCTTTTTTTTTTGTTGAGAATAATAGCTTTTGGTTTATCAAAAGTTTGATTGTACTTTGCAGAAATCAAGGAGGTGGAAATGGATTTTTAGAAGACTGAAACTAAAGCAACACCACCTTGCACTTCCTGCACCTCAAAAATCATTGTGTGAAGCAAGGGAAGAGCAAAGAAATCATGCTTTAAACGTAGCCATTGCAACAGCTGCCGCAGCGGAGGCTGCAATTGCTGCCGCCCAAGCAGCGGCTGAGGTTGTGCGTCTCACAGTTGCCTCTAACCCTTCTCATCATTTCACTACAATCGACAGAAACTTG…	GarIQD31	MGKKRCWFSWVKKIFASDAKPKPEKKSRRWKWIFRRLKLKQHHLALPAPQKSLCEAREEQRNHALNVAIATAAAAEAAIAAAQAAAEVVRLTVASNPSHHFTTIDRNLAALKIQTAYRAHLARKALRALKGVVKLQAIVRGRAVRRQALINRKWLQSGTNMYPKVKEKSTSPTKVICQDSRRKQSLMNKDELQDKDIKGQYACNSEKSWNDSVLSKQDIEVNFLRSQEAMAKRERMKKYSYSHRERLNTRMLDELVHVKEAKAEANERERVMTSKLDVPSNLSTWEVNGPPHVRHRKLKKQQDTLNGMNPLFSFPRRSFSRTQQSVAGDEGSIPNSPVFPSYMGATECAKAKARSRSTPRQRVGFWDSCFDNSGAYKGGLSLWSTYERAPFSIDESCCL…	GarIQD31	ATGGGAAAGAAAAGGTGCTGGTTTAGTTGGGTGAAGAAGATATTCGCTTCTGATGCAAAACCAAAACCGGAAAAGAAATCAAGGAGGTGGAAATGGATTTTTAGAAGACTGAAACTAAAGCAACACCACCTTGCACTTCCTGCACCTCAAAAATCATTGTGTGAAGCAAGGGAAGAGCAAAGAAATCATGCTTTAAACGTAGCCATTGCAACAGCTGCCGCAGCGGAGGCTGCAATTGCTGCCGCCCAAGCAGCGGCTGAGGTTGTGCGTCTCACAGTTGCCTCTAACCCTTCTCATCATTTCACTACAATCGACAGAAACTTGGCTGCTCTTAAAATCCAAACTGCTTATCGGGCACACCTGGCAAGGAAAGCACTCAGGGCATTGAAGGGAGTAGTG…
Ga09G1728	Ga09G1728.1	GarIQD32	ATGGGGAAGAAAGGAAAATGGTTGTCTTCTTTGAAGAAAGTGTTCAGCCCAGATTCCAAGGAAAAGAAAAACCAGGTTTGAAGAAAATCCCATTCACCTAATTTTGCCTTTGCAGTAGTTTATAGTCCTCAATGAGTTTTTAGTATTCTTGATTGCTATGTTTTTCAGAAATCAAAACAACAGTTGTTGGAGAAGCAGGTGCATTTGGGTTCCAATGATTCTGGTGCAGCCACTTTAGAAACTGTCAACTTGCCCCCTCCTCCGCCAGAAGAAGTTAAACCGATTGAAGCAGAAAGCAAGCTGACTTACCCTGTGGCAGTTGCCACTGCTGCTGCTTCACCTCAGGCTGCCGTAGAGGTTGTTCAACGTCAGCTTAATAGAGATGCTCTGTTCGCTGGA…	GarIQD32	MGKKGKWLSSLKKVFSPDSKEKKNQKSKQQLLEKQVHLGSNDSGAATLETVNLPPPPPEEVKPIEAESKLTYPVAVATAAASPQAAVEVVQRQLNRDALFAGKSEEEVAAIKIQTAFRVYLARRALHALKGLVRLKSLMEGPVVKRQAVSTLRCMQTLSRLQCQVRIRRTRMTEENQALQRQLLQKHAKEIVNLQMGEDWDDSLQSKEQIEASLLSKHEAAMRRERAMAYSFTHQQTWKNASRSMNPLFMDPNNPSWGWSWLERWMAAPPQEGRGTTEKEQNDQSSIRSARSNFGGEISKAHARYQLNLDKQSPKTGQKPNQTSSLLSVSTPKTSASIPARKLKSASPRSSVVGPNDDGRSMVSIQSERNRRHSIAGSSVHDSESLGSSPSLPSYMVPT…	GarIQD32	ATGGGGAAGAAAGGAAAATGGTTGTCTTCTTTGAAGAAAGTGTTCAGCCCAGATTCCAAGGAAAAGAAAAACCAGAAATCAAAACAACAGTTGTTGGAGAAGCAGGTGCATTTGGGTTCCAATGATTCTGGTGCAGCCACTTTAGAAACTGTCAACTTGCCCCCTCCTCCGCCAGAAGAAGTTAAACCGATTGAAGCAGAAAGCAAGCTGACTTACCCTGTGGCAGTTGCCACTGCTGCTGCTTCACCTCAGGCTGCCGTAGAGGTTGTTCAACGTCAGCTTAATAGAGATGCTCTGTTCGCTGGAAAATCTGAGGAGGAAGTGGCAGCAATAAAGATTCAAACAGCTTTCCGAGTTTACCTGGCTAGAAGGGCATTGCATGCTTTAAAAGGATTGGTC…
Ga09G2014	Ga09G2014.1	GarIQD33	ATGGGTCTTTTCCGGCGACTCTTTGGAGCCAAAAAGTCCGACAAAACCCGATCCGATAAAGAACGGAGGCGTTGGAGCTTTGCTAGATCTTCCAATCCCACGTCTTCAACTTCCCATATAGATCATGCTCTTACTACTGCTCCATGCAGTGACACCTTGGATGCCAGCAAGCACGCAATAGCAGTAGCAGCCGCCACTGCTGCTGTAGCTGAGGCTGCTCTCGCAGCTGCGCATGCGGCTGCTGAGGTTGTTAGACTGACAAGTGGTGGTGGTGGCCCCGCTGGGAACAACCGACGACTCGTACAGGAGGTAGCGGCTGTTAGGATACAGTCCGCTTTTCGAGGTTATCTGGTTAGTATTTTCTTCCTTTTTACCTTCACATCATTTCTTCCTAGCCAT…	GarIQD33	MGLFRRLFGAKKSDKTRSDKERRRWSFARSSNPTSSTSHIDHALTTAPCSDTLDASKHAIAVAAATAAVAEAALAAAHAAAEVVRLTSGGGGPAGNNRRLVQEVAAVRIQSAFRGYLARRALRALKALVKLQALVRGHFVRKQTADMLRRMQTLVKLQDRARSSRAHVTKSLDSVVKMSRLPRNAVHATSGKDECQLRAYCTKSDGLSILKRCGSNSNFRNIIDLEKARMGSNWLDHWREESLWNNRREAPLSRRLADDEKSDKILEVDTWKPHLSSQQSHRNVRPSQHFSALDYTQSFTAYDSPRKASGKASNAIPNISSAEVLTLSSMKYPGGKDEAVLRTADNSPQVHSASSRPGSSARRSPFTPTRSECSWGYLSGYSGYPNYMANTESSRAKYR…	GarIQD33	ATGGGTCTTTTCCGGCGACTCTTTGGAGCCAAAAAGTCCGACAAAACCCGATCCGATAAAGAACGGAGGCGTTGGAGCTTTGCTAGATCTTCCAATCCCACGTCTTCAACTTCCCATATAGATCATGCTCTTACTACTGCTCCATGCAGTGACACCTTGGATGCCAGCAAGCACGCAATAGCAGTAGCAGCCGCCACTGCTGCTGTAGCTGAGGCTGCTCTCGCAGCTGCGCATGCGGCTGCTGAGGTTGTTAGACTGACAAGTGGTGGTGGTGGCCCCGCTGGGAACAACCGACGACTCGTACAGGAGGTAGCGGCTGTTAGGATACAGTCCGCTTTTCGAGGTTATCTGGCACGGAGGGCACTGAGAGCTTTGAAAGCATTGGTGAAGCTTCAAGCG…
Ga09G2369	Ga09G2369.1	GarIQD34	ATGGGGAAGACAGCGAAATGGTTGAAAAGCTTGTTGACTGGTAAGAAAGACAAAAGTAGAAACATAAGTAATAATCAGAATTCTTCAGTTGTCCCTGAGAATCCAACGACGACCGTTTCGATCCCACTGCCACCGACAACTCCTAAAGAGAAACGACGATGGAGTTTCCGGAGATCTTCGGCTTCAGCGACGCCTGTTAGGGAGTTGAATTCTGTAGAACAAGTGGTTACCCCTTCACCTCCACCACCACCGGCTCCGCCGGTTGTGACCGATGTGATCCGGGTAAGTGGTAGTGCTGATGATGAGAAAGTTGATGCAGGTGAAGAGGCGGCTGCTAAGATGATTCAAGCTGTGTTTCGGTCGTACCTGGTATGTTATAATTTGTTAGATTTGATGGCT…	GarIQD34	MGKTAKWLKSLLTGKKDKSRNISNNQNSSVVPENPTTTVSIPLPPTTPKEKRRWSFRRSSASATPVRELNSVEQVVTPSPPPPPAPPVVTDVIRVSGSADDEKVDAGEEAAAKMIQAVFRSYLARKALKALKGIVKLQALVRGHLVRRQASVTLKCMQALVTAQARARAQRIRMVEDSRPASRRQSPHRRSTTPDQRLRHGYHEIDSGVEENIKIVEIDHGDSKASLQSRNSYSMEHRFSNHQASPVTSSYLADQISPGACSGHFEDHFFTVAQSSPHYAESETFEYSFCPNYMANTESSRAKARSQSAPKSRPDSIERQPSGRRRSSTEGRNHVPKAMKMKRSSSHVGAAEKNSQYQYQYQYPWSIKLDRSSVSLIDSECGSTSTVLTNTNYCRSHFG…	GarIQD34	ATGGGGAAGACAGCGAAATGGTTGAAAAGCTTGTTGACTGGTAAGAAAGACAAAAGTAGAAACATAAGTAATAATCAGAATTCTTCAGTTGTCCCTGAGAATCCAACGACGACCGTTTCGATCCCACTGCCACCGACAACTCCTAAAGAGAAACGACGATGGAGTTTCCGGAGATCTTCGGCTTCAGCGACGCCTGTTAGGGAGTTGAATTCTGTAGAACAAGTGGTTACCCCTTCACCTCCACCACCACCGGCTCCGCCGGTTGTGACCGATGTGATCCGGGTAAGTGGTAGTGCTGATGATGAGAAAGTTGATGCAGGTGAAGAGGCGGCTGCTAAGATGATTCAAGCTGTGTTTCGGTCGTACCTGGCAAGGAAAGCTTTGAAAGCGTTGAAAGGG…
Ga09G2416	Ga09G2416.1	GarIQD35	ATGGGAAAGAAGGGAAGTTGGTTTTCTGCAATTAAAAAAATTTTCTTTCCACACTCCAAGGAAAAGCTAAGTAATGTAAGTTGTTATTCTAACAATGATGCATATGAACTTCACCACTTCATCCGTGCTTTTGTTTCAACTCTACGAATTTATACAATCGTAGATGATATATGGTTGCTTAATTTCGTTCTTTCTCTTGTGTATGAGGTTTAAACATGGCTGTAGGTTGTGCTGGCATGAAAAACAGTTTTATGTTCTCAAACCAGTTTGTGATTACTGAATAGAAGAGCATAAGAACCCGGAATTTTGGAAAAAGGGTCTAAAACACAAGTGGATATAATTAGTTGCCTTTTGATGAACTATAGATGCATCTAATTGGAGTGTGAAATTTCTGATTGA…	GarIQD35	MGKKGSWFSAIKKIFFPHSKEKLSNESDKRSDKEKKKGTGKLRHGETNSFLPLFRKPSSIEKILGEAEREHNLIFRPPTPPEQPRTPPFVPHRPASPRGPSPRVASPRSCFSTSTSTPPPRAASPRVASPRGASPKPAPSRIVRPRPEPTLKNQHASATQIQAAYRGYKARRSFRALKGLVRLQGVVRGQHVKRQTTNAMKYMQLLVRVQSQIQSRRIQKLENQERQQAQSKEAESTLGKWISQSEAGNENWDDSVLTKEEREARMQRKVEAVIKRERAMAYAYSNQLWKSTPGSGIRSGGFPWWWNWLDHPLPPVNAPGSQGTKSFQLTPPRPNSQLKPSSRPQSSGSRQRQFTYDNIMETPTPKSTRSTIIHATRRMRTPPSSSRPRARGAASPFDL…	GarIQD35	ATGGGAAAGAAGGGAAGTTGGTTTTCTGCAATTAAAAAAATTTTCTTTCCACACTCCAAGGAAAAGCTAAGTAATGAATCGGATAAAAGAAGTGATAAAGAAAAGAAGAAAGGCACAGGAAAATTAAGGCATGGAGAAACCAATTCCTTCCTTCCCCTCTTTAGAAAGCCCAGCAGTATCGAGAAAATTCTTGGGGAAGCTGAACGAGAGCATAATCTAATATTCAGGCCTCCCACACCTCCGGAGCAGCCAAGAACACCACCTTTTGTGCCTCATAGACCTGCATCTCCACGGGGTCCATCTCCTAGGGTTGCCTCTCCTAGGAGCTGCTTCTCCACCTCCACCTCCACCCCACCCCCTCGAGCTGCTTCTCCTCGAGTTGCTTCTCCAAGAGGTGCT…
Ga10G0119	Ga10G0119.1	GarIQD36	ATGGCGAAGAAGAAGAGCTGGTTCAATCTAGTGAAGAGGTTCTTTCTCTTTGAGACACTTATAAATGCACAAAAGGTAACTCCTCACCCCCCCCCTTTCCTTTTGCTGTTCTTGTATGGATGAATGGCTGTCATGGATGTTAATATGTTATATATATCTGTCGGTAGGATAACAGAAGGAAATGGATGTTTGGAAGGTTTAGGACCAAAAGGTTAGCATCCATTAAAGCTCCATCACCACCAAGAGACACCATAAAATATGAAACAGAGGAGGACCAGAAGAATCATGCCTTAACAGTGGCAATTGCCGCAGTGGCTGCTGCTGAAGCAGCTGTTGCAGCTGCTCAGGTTGCAGCCGAGGTTGTTCGCCTCACAGGCAATGACGCCCCTAAAGCTAAAG…	GarIQD36	MAKKKSWFNLVKRFFLFETLINAQKDNRRKWMFGRFRTKRLASIKAPSPPRDTIKYETEEDQKNHALTVAIAAVAAAEAAVAAAQVAAEVVRLTGNDAPKAKEEQTNDVKPDCSSSSELGNKFQQLAAIKIQASFRGYLARKALRALKGIVKLQAIIRGRVVRRQALTALKCLQSIVNIQSQVCARRFQIVEGTWQQHDENKELITLKDKILKVDTNSQTRWDNCNGGLKYWLDQWVDTKSKDVEVEDIDSVWTSNRKPTRLKTFSRQYHCDAEGVDIPVRVQGRRSFHGKQSSLGEDSSFITSPVVPTYMAATQSTKAKVRSMSSPKLRPGTCDTQSESYSPYKNKLCLLSSVTSKPNAYEQRSPTLKVVKSKKTLKDLSFNS	GarIQD36	ATGGCGAAGAAGAAGAGCTGGTTCAATCTAGTGAAGAGGTTCTTTCTCTTTGAGACACTTATAAATGCACAAAAGGATAACAGAAGGAAATGGATGTTTGGAAGGTTTAGGACCAAAAGGTTAGCATCCATTAAAGCTCCATCACCACCAAGAGACACCATAAAATATGAAACAGAGGAGGACCAGAAGAATCATGCCTTAACAGTGGCAATTGCCGCAGTGGCTGCTGCTGAAGCAGCTGTTGCAGCTGCTCAGGTTGCAGCCGAGGTTGTTCGCCTCACAGGCAATGACGCCCCTAAAGCTAAAGAAGAACAAACCAATGATGTTAAACCTGACTGTTCTTCATCTAGTGAGCTTGGCAACAAGTTCCAACAACTTGCTGCTATAAAAATCCAGGCT…
Ga10G1732	Ga10G1732.1	GarIQD37	ATGGGAAAGAAAGGAAGTTGGTTTTCTGCAATTAAAAGGGTTTTCATACCACACTCCAAGGAAAAGCTAAGTAATGTAAGTTCATATTATTAACTAGGTCTATGGTTTTGATTAACTATATGAAAAGAACGTACTAGTTGTAGATGTTTTTTATTGTTTAATTTCATTATCTATCTTATATTTTTGTTAGAGAAAACCTTACATTTTGTGTATAAGGTTCAAACATCCAGCAGATAGTTGTGATTGCTGATTAGGTAAACAAAAGAACCCGGCATTGGAAAGATGTCAAAATAGAAATGGGTAGAATTAGTTGCCTTTGGAGAGTGAAATTTCTGATTGAAGACATTTTTGTTGCATAGTCAGCTCTTGAAGTCAATGTGTTTGTTTCATAGATCAAAT…	GarIQD37	MGKKGSWFSAIKRVFIPHSKEKLSNESDKRSGKEKKKKALGKLRHGETNSFIPLFREPSKHKLVFRPPTPPEQPATPPFVPHKDASPRVPSQRIASPRIASPRAASPRTVSPPRAASPRAAPPKVVRPRPEPTLRNHHASATKIQAAYRGYMARRSFRAWKGLVRLQGVVRGQNVKRQTSTAMKRMQLLVRIQSQIQSRRIQMLENQARQEVHFKNDKEVESTLGKLAFSQASETGNEDWDDSVLPKEEIEARMQRKVEAVIKRERAMAYAYSHQLWKTTPKTVHADIRTRGFPWWWNWLERQLSSSNTPESQGIKNFQLTPPRPNSELKPSPKPPLSSKQHQFMFDNMDTPTPKSTRSTTRPMQTPPSRILQGSSSGLSKYSRPRASGADSPFDLPLK…	GarIQD37	ATGGGAAAGAAAGGAAGTTGGTTTTCTGCAATTAAAAGGGTTTTCATACCACACTCCAAGGAAAAGCTAAGTAATGAATCGGATAAACGAAGTGGTAAAGAAAAGAAGAAGAAAGCCCTAGGAAAATTAAGGCATGGAGAAACCAATTCCTTTATTCCCCTCTTTAGAGAGCCCAGCAAGCATAAACTAGTATTCAGGCCTCCAACACCTCCAGAGCAGCCAGCGACACCACCTTTTGTGCCTCATAAAGATGCTTCTCCTAGAGTTCCTTCACAGAGGATTGCCTCTCCTAGGATTGCTTCCCCGAGGGCTGCTTCTCCAAGAACCGTTTCCCCTCCACGAGCTGCTTCTCCAAGAGCTGCTCCACCTAAGGTCGTCCGTCCTCGACCAGAACCAACT…
Ga10G2763	Ga10G2763.1	GarIQD38	ATGGGTTCTGGAAATGTGTTGAAGACACTAGTGAATATAGTGAAGGATGACAGCTCAAAGCAAGTGAAGGTATATATATCATTATTTTACTTAACAATCATAAGCTAAGCTCTGCAAGCTTTCTGTTATCCTGTTATGAATAAAATCTGAGTTTGGTTCTGAAATAATTCATTTTCTATTTGAATCTTTTGGACTAATGTTATCCAAATTCCAAACCCTTTTGAGAAGTGTAATCTTGTGTACCATTGGAATGACAAATTTTGAGGCTTTTAGTTACTTTTTTCTCAACGAATCCGAGCTCATATTCGGCTATAAGTGTCACTTCTATACCTTCCCTGACACCATTTGTTCAATTTGGTTGTCATATGCCAACATCTGAATATGTGTTTGGATGGTTAT…	GarIQD38	MGSGNVLKTLVNIVKDDSSKQVKRSSGSTKSKGFKWKKLQRKTSMRTKFIRDSAALGMSIEDLAATRIQTAFRAYRARKKLRLLKGIVRLQAKTRTYSIKKQATTTLHYLHSWSNIQAQIRARRLCMVTEGHLRQKKIANQLKLEAKLHELEVEWSGGPGTMEEVLTKIHQKEAAAVKRERTMAYAFSHQWRAPNSINNGLGSYRLAKANWGWSWVERWIAVRPWERRLPTPSTTPKSTPKEPQNKQTSKGSKNSNSPKPKASVSVKPPLSNAKGAMKPRRLSYPGAEKPAARQVNTKADKINIEKEEIST	GarIQD38	ATGGGTTCTGGAAATGTGTTGAAGACACTAGTGAATATAGTGAAGGATGACAGCTCAAAGCAAGTGAAGAGATCTTCAGGTTCTACAAAATCCAAAGGCTTCAAATGGAAGAAACTCCAGCGAAAGACGTCCATGAGAACAAAATTTATTAGAGATTCCGCTGCTCTTGGTATGTCAATTGAGGATTTAGCAGCAACTCGGATTCAAACCGCATTCCGAGCCTATAGGGCTAGAAAAAAATTACGTCTATTGAAAGGTATAGTAAGATTACAGGCTAAAACCCGAACTTATTCAATCAAAAAGCAAGCTACAACAACATTACATTATCTTCATTCATGGAGCAACATACAGGCTCAGATAAGAGCTCGTCGACTATGTATGGTAACGGAAGGCCACCTT…
Ga11G2998	Ga11G2998.1	GarIQD39	ATGGGGAAGAAAGGAGGGACTTCCTGGTTGACTGCTGTGAAAAGGGCTTTTAGATCTCCGACTAAAGACGGTCATGATAAGAGAAGTAACAGAAGAAAGGATGAACCTGACCACCAAGATGAGGATGAAGACAAGGTTTGTATTATAGTATCAATGAACTCTTCATTCATTTCTATACATGAAAACAGAAGAAAACAAAACAAAAATAATAATAATAATAAATGAAGTTGAATCTTTTACAGTAAATATAATTCTTGATCTGTTACTGGTTTTGGTAGAAGAGAGAGAAGCGAAGGTGGATCTTCAGGAAACCCACAATTCAAGAACCGGTGATTCATCAGCAAAAAACACCAGTGAAGGCTACAGGTCGTAATGGTGCAGGTGCAGCATCAGATGGTG…	GarIQD39	MGKKGGTSWLTAVKRAFRSPTKDGHDKRSNRRKDEPDHQDEDEDKKREKRRWIFRKPTIQEPVIHQQKTPVKATGRNGAGAASDGATATAAEQRYDIPMAATEGAAVVQVARPTRPSNYAREHHLAAIVIQTTFRGYLARRALRALKGLVKLQALVRGHNVRKQAKLTLRCMQALVRVQARVLDQRVRLSHDGSRKSAFSDTNSVLESRYLQDISDRRSLVSREGSSIADDWDERPHTIEEVKAMLEHRKEAALKREQNLSQALSQQMRRARRSPSMGDEDEVDGRPKWLDRRTPAKPWDNRGRASTDHRDSVKTVEIDTSQPYSYLAATYKRTNSNQYHQHGPQNQRPSSPLHRAQQNAPMHHSPITPSPSKARSIQVRSSSPRCVRGDRSSVSSQTP…	GarIQD39	ATGGGGAAGAAAGGAGGGACTTCCTGGTTGACTGCTGTGAAAAGGGCTTTTAGATCTCCGACTAAAGACGGTCATGATAAGAGAAGTAACAGAAGAAAGGATGAACCTGACCACCAAGATGAGGATGAAGACAAGAAGAGAGAGAAGCGAAGGTGGATCTTCAGGAAACCCACAATTCAAGAACCGGTGATTCATCAGCAAAAAACACCAGTGAAGGCTACAGGTCGTAATGGTGCAGGTGCAGCATCAGATGGTGCAACCGCAACGGCCGCAGAGCAAAGGTATGATATTCCTATGGCAGCAACCGAGGGTGCAGCAGTGGTACAAGTGGCTCGCCCAACTAGACCTTCAAATTATGCTAGAGAGCACCACCTTGCTGCCATTGTTATTCAGACCACT…
Ga11G3774	Ga11G3774.1	GarIQD40	ATGGGAAAATCACCGGGAAAATGGATTAAGGCTGTGCTTTTTGGAAAGAAATCTTCGAAAACTGGTTATCATAAAGGAAGGGAGGTAATATTTATTGCTAATTACTACTAAACGAAAAATATAATGTTTAGATTATGTACATGAGGAACTGCATATAGTTCCTCTGTCATTTGGTTTATTTTTGGTGGCTTCATTCCCTCTACTGAGAAAGTTAAGTAATTGTAAAGGATTAGCTGATTTGAGCGGTAGCTTCCCCGAAATTTCTCGGGAGCTGTTGTATTTAACATGGCTGTTTTGATGCTTTGGTTTTGGGAATGTATCATTCTTTCCTCGAGTTATGAGATAAACATGATATGGCATCTTTCTTCCATCAATCCTAAAATATTAATGTACACTTCT…	GarIQD40	MGKSPGKWIKAVLFGKKSSKTGYHKGRENVANVNEVLVSARASEAEVPVAPPFPSQLNQYANERNERDERKLELENKEAANISNDDRISLPVSQGIDSQESALQYFQNDPERMKQKQAATIVQAAFRGYLARRAFWALKGIIRLQALIRGHLVRRQAIATLCCVMGIVKLQSHIRGVMARRSDGGLEVQKKYNQMNLWESKPVVSLGVNMPARIGKLSANAFARKLVASSPPVMPLHLHDDAGEPNSVCNWLERWSASCFWKPVPQPKKASKLQKKQANGQVVETDSGRPKLSVRRIRPANLDCASVQATSELDKPKRNLRKVSSHPAEMAVKENPQNELEKVKRNLRKVHNPVVENSVQSQVESDKQKQSLEKFPSATNPDIVEQSLNSLAEKANKEM…	GarIQD40	ATGGGAAAATCACCGGGAAAATGGATTAAGGCTGTGCTTTTTGGAAAGAAATCTTCGAAAACTGGTTATCATAAAGGAAGGGAGAATGTTGCCAATGTAAATGAGGTGCTGGTTTCAGCCAGGGCATCAGAAGCTGAAGTCCCTGTGGCTCCTCCTTTCCCTTCACAGCTTAATCAATATGCTAATGAGAGAAATGAGAGAGATGAAAGGAAATTAGAACTGGAAAACAAGGAGGCTGCAAATATCTCTAACGATGACAGGATATCACTGCCAGTGAGTCAAGGCATAGATTCTCAGGAATCCGCTCTTCAATATTTCCAAAATGATCCTGAAAGAATGAAGCAAAAGCAAGCAGCAACCATCGTTCAGGCTGCTTTTAGGGGTTACCTGGCTCGCCGA…
Ga11G3948	Ga11G3948.1	GarIQD41	ATGGTAAACAAAACACCGACCTCGTGGTTGTCAATGGTGAAAAGGGCTCTCGGGTCTAATGCTAAAGATAACGAGAAAAAAAGTTGCAGAACAAGAGAGAAAAGAAGATGGCTATTTAAATGGTCTCAACAACGTAAACCCAAGACCAAATCACAATCCATTGCAGCTGTTAACATCGTTAGGCTTAATTGCAGAGCTTCCAATTACGCCATTGTTGGAGAAAAAAACCAAGCTGCTATTGTCATTCAAACAGCTTTTAGAGGCTACATAGTAAGTGAAAGATTCTCTTTCTATATATAATTAACTGTTCATTTAGTGTTTTTATTTTTTATTTTTTTTTTTGTGAAAGGCAAGGAAAGCATTGGGAGCATTGAAAGGGGTAGTGAAGCTTCAAGCTTT…	GarIQD41	MVNKTPTSWLSMVKRALGSNAKDNEKKSCRTREKRRWLFKWSQQRKPKTKSQSIAAVNIVRLNCRASNYAIVGEKNQAAIVIQTAFRGYIARKALGALKGVVKLQALVRGHNVRRRAKVALKCMQSLVRVQNRVLLHQQRARLSYEGCRRAMFIESNSSWESPCLQDLRRRKSILNEKEVEEATKWLDRRRAIKQWESHNRASIDKRDSIREPMQLRLPSLRCLKEKSSYHSAANSPRLTMVPNYMAATESEKAKVRSRSTTRQRPGNAERDGGGQISPRSTSDLRWMKL	GarIQD41	ATGGTAAACAAAACACCGACCTCGTGGTTGTCAATGGTGAAAAGGGCTCTCGGGTCTAATGCTAAAGATAACGAGAAAAAAAGTTGCAGAACAAGAGAGAAAAGAAGATGGCTATTTAAATGGTCTCAACAACGTAAACCCAAGACCAAATCACAATCCATTGCAGCTGTTAACATCGTTAGGCTTAATTGCAGAGCTTCCAATTACGCCATTGTTGGAGAAAAAAACCAAGCTGCTATTGTCATTCAAACAGCTTTTAGAGGCTACATAGCAAGGAAAGCATTGGGAGCATTGAAAGGGGTAGTGAAGCTTCAAGCTTTAGTGAGAGGGCACAATGTGAGAAGACGAGCAAAGGTGGCACTAAAATGCATGCAATCTTTGGTTCGAGTACAAAATCGA…
Ga12G0300	Ga12G0300.1	GarIQD42	ATGGGAAAGAAAGGGAGTGGATGGTTCTCGACGGTGAAGAAAGTGTTCAAATCTTCTCACAAAGACTTGCCTGACAAAAAAGTAACGTATTTTTTCATTGGTTTTTAGATTTTTTTTTTTTTGGGCCTTTTGATGTTTGTTTAGCAGGTTGATTTGATTGCCATATTTCCAAGCTAAACCAATGGCACCTTTCAAGTTTTTTTTTTTCATTTTAAGGCAATTTTTTAATAAATGCAGGGAAAAAAAGAGAGAGCAAACATCTACATCACAAACATCTGGATTTTTGCTTGTATTTATTTGGGTTCTTATCTTTTTGTTGTTAGAACTTGGTTAACTATATAGTGCCCAGGTTTGCAAGTACATTACAAATTCTCTTTGATCTTACTCATTTGTGGTCAT…	GarIQD42	MGKKGSGWFSTVKKVFKSSHKDLPDKKRENNVEKWPNEAPDVVSFEHFPAESSPDITNNESAMSTPLNEDRNHAIAVAMATAAAAEAAVAAAQAAAKVVRLAGYGRQSKEERAATLIQSYYRGYLARRALRALKGLVRLQALVRGYNVRKQAQMTMRCMQALVRVQARVRARRLQLTDHDKIPKRSDEDDEGKKGTGEVERKPRSLLKRYDSWDGGQQSSEKVKESVSKKHDAAMRRERALAYAYSYQQQQPQQQLMQPHPNGKDVGVHLNDREKAQWGWNWLEHWMSSQPYHARQLGHQEGSYMTLPTTTATTTVTDNMSEKTVEMDVVTAMDSGSYSTLQQAQSGSSNVPSYMAPTQSAKAKVRSQGPMIMKQQRVPHAPQWNPSTKKSPGCDSSSS…	GarIQD42	ATGGGAAAGAAAGGGAGTGGATGGTTCTCGACGGTGAAGAAAGTGTTCAAATCTTCTCACAAAGACTTGCCTGACAAAAAAAGAGAGAATAATGTGGAGAAATGGCCAAATGAGGCCCCGGATGTAGTGTCGTTTGAACATTTTCCGGCGGAGAGTTCACCGGACATCACGAATAATGAGAGTGCCATGTCGACTCCTCTGAATGAAGATAGGAACCATGCCATTGCTGTCGCCATGGCAACTGCTGCTGCTGCAGAAGCAGCTGTTGCGGCAGCTCAAGCTGCCGCTAAAGTCGTCCGGTTGGCGGGTTATGGACGACAATCTAAGGAAGAAAGAGCTGCAACGCTTATACAGTCGTATTATAGAGGCTATCTGGCTCGGAGAGCTTTGCGTGCTTTG…
Ga12G0386	Ga12G0386.1	GarIQD43	ATGGGAAAGAACTCTGCTACCTCGTGGTTGTCAATGGTGAAAAAGGCCTTTAGGTCTCCAGGTAAAGATTATGAGAAAAAGAGTAGCAGAAGGAGAGAAGAATGTGGGCATCAGGAAGAGGATGAAAAGGTAGTATATAGTAATTAAAAACTTCATCATTCTCTTAAATTTATTTTTTGTAGTATAATTTATTTAATTGAGTTGGTGGTGGGTGCATGGCTTTTTTTGGGGTTGTGCAGAAGAGGGAGAAAAGAAGATGGCTGTTTAGAAGGGGCAGTAGTAATATCAATCATGTCCAACAGTGTGAAGCAAAGACACCAACACCAACAACATCGACAAGTACTGCTGCACCACCTGCGAACAATGCAGCAGAAACAGCATTGGGTTTTGCAGAACAAC…	GarIQD43	MGKNSATSWLSMVKKAFRSPGKDYEKKSSRRREECGHQEEDEKKREKRRWLFRRGSSNINHVQQCEAKTPTPTTSTSTAAPPANNAAETALGFAEQRHAIAVAAAEAAVATAQAAVEIVRLSSRPSNYANVREHYHYAAIVIQTAFRGYLARRALRALKGLVKLQALVRGHNVRRQAKLALKCMQSLLRVQDRVLDQQRARLSHEGYRRKSMFDETNALWETRYLQDIRRRKSMSRDMSCTTDEWDDRPQTSEEIEALLLTKKEAALKREKALAYAFSNQIWRSRRNPSAEDEKEVEERTKWLDRWMATKQWDNNNRVSTDKRDSIKTVEIDSYKLQSYSSPTIRRPHSFFLNQFPPTPSPCKTKPLQVRSASPRCLKEEKCYTSAANTPSLASTYCTT…	GarIQD43	ATGGGAAAGAACTCTGCTACCTCGTGGTTGTCAATGGTGAAAAAGGCCTTTAGGTCTCCAGGTAAAGATTATGAGAAAAAGAGTAGCAGAAGGAGAGAAGAATGTGGGCATCAGGAAGAGGATGAAAAGAAGAGGGAGAAAAGAAGATGGCTGTTTAGAAGGGGCAGTAGTAATATCAATCATGTCCAACAGTGTGAAGCAAAGACACCAACACCAACAACATCGACAAGTACTGCTGCACCACCTGCGAACAATGCAGCAGAAACAGCATTGGGTTTTGCAGAACAACGGCACGCAATTGCCGTTGCAGCTGCTGAAGCTGCTGTGGCAACAGCACAAGCGGCTGTTGAGATCGTTAGGCTTAGTTCTAGACCTTCCAATTATGCCAATGTTAGAGAA…
Ga12G1753	Ga12G1753.1	GarIQD44	ATGGGGAAGAAAGGAGGGACTTCATGGTTGACTGCTGTGAAAAGGGCTTTTAGATCTCCTACTAAAGATACCCATGATGATGAAAAGGTAAGTGTTTCAATCTATTTTAATGGCTGTTTATGAATATAAAAAGAAAAGCCTTTGATTTTTTATTTTTTTTATATAGAAGAGAGATAAACGGAGGTGGATCTTTAGGAAACAAGATACAAGTCCTGTGAAGAGTGTAGGTAATAATGGTGGTGGTGGTGGTGGTGCAAGTACGGCAGCAGCGGAGCAAAGGCATGCTATTGCTGTGGCGGTGGCTAAAGCAGCGGAAGCTGAAGCTGCGGTGGCGACTGCACAAGCAGCTTTACAAGCTGCTCGGTTGACTAAACCTAGTTATGGCAGGAAACATCACTT…	GarIQD44	MGKKGGTSWLTAVKRAFRSPTKDTHDDEKKRDKRRWIFRKQDTSPVKSVGNNGGGGGGASTAAAEQRHAIAVAVAKAAEAEAAVATAQAALQAARLTKPSYGRKHHFAAIVIQTAFRGYLARRALRALKGLVKLQALVRGHNVRKQAKMTLRCMQALVKVQSRVLDQRMRLSHDGCSRKSAFSDTWESRYLQDISDRRSLSRGGSSIADDWDERPHTVEEVKAMLQHRKEAALKREKSLSQALSQQMRRARRSPSMGGQDEWLDRWMPAKPWDNRGRASMDQRDNVKTVEMDTSQPYSYVAPNYRRTNSNHYHQRPSSPLHRAQHNAQAFHPSPITPSPSKTRPVQVQSASPRCVREDRTSFSSSQTPSLRSNYYYTGRVSTQASTSINNATTLPNYMA…	GarIQD44	ATGGGGAAGAAAGGAGGGACTTCATGGTTGACTGCTGTGAAAAGGGCTTTTAGATCTCCTACTAAAGATACCCATGATGATGAAAAGAAGAGAGATAAACGGAGGTGGATCTTTAGGAAACAAGATACAAGTCCTGTGAAGAGTGTAGGTAATAATGGTGGTGGTGGTGGTGGTGCAAGTACGGCAGCAGCGGAGCAAAGGCATGCTATTGCTGTGGCGGTGGCTAAAGCAGCGGAAGCTGAAGCTGCGGTGGCGACTGCACAAGCAGCTTTACAAGCTGCTCGGTTGACTAAACCTAGTTATGGCAGGAAACATCACTTTGCTGCTATTGTTATTCAGACAGCTTTTAGAGGCTACCTGGCCAGGAGAGCTCTACGTGCGTTAAAAGGGCTAGTGAAG…
Ga13G0123	Ga13G0123.1	GarIQD45	ATGGGAAAGAAAAGGAGCTGGTTTAGTTGGGTGAAAAAGATTTTTGCTTCTAATGCACAACCAAAAACACAGAAGGTTCATTTTCAGTACTTGTTACTTTTCAACTTTTGCTTCTTTCTTTTTATTTTTTTTTTGAATAATTAATAGCTTTTTGATTCATCTTTTTGGTTCTTTTTTCCTTTTTGTTTGTAATAATTTCGGTTCTACTTTTCAGAAATCAAGGAGGTGGAGATGGATTTTCGGAAAACTAAAGCTCAAGCAATGTCGCCCTGCATTGCCGGCGATACCCCAGCAGAAATCGTTATGTCAAGCAACCGAGGATCAAAGAAAGCATGCTTTGAATCTTGCCATTGCGACAGCTGCTGCAGCTGAAGTTGCGGTTGCTGCAGCACAAGCAGC…	GarIQD45	MGKKRSWFSWVKKIFASNAQPKTQKKSRRWRWIFGKLKLKQCRPALPAIPQQKSLCQATEDQRKHALNLAIATAAAAEVAVAAAQAAAQVVRLANASNHFSNFTTRDRNRAAIKIQTAFRAHLARKALRALKGLVLLQAIIRGQVTRRRAMKNMKCLQSGTDMYPEIKEKVICQDTRRNQSLVHKDQLQGKDIIKHEYYSRRNWNDSVFSKEDAEAVWLRRQEAMAKRERMKKYSYSHRERVNSYMLDESVHVKETGRNSFVEAEANSEGTRRERMMILKHNVASNSSRWEVHGLHGLNSPYLFPRRSFCRVQNQNPAGNESSVPSSPVFPTYMAATESAKAKVRSMSTPRQRLGLPDTCFDHNMPYKGGLSLWSTYNGETFEYQ	GarIQD45	ATGGGAAAGAAAAGGAGCTGGTTTAGTTGGGTGAAAAAGATTTTTGCTTCTAATGCACAACCAAAAACACAGAAGAAATCAAGGAGGTGGAGATGGATTTTCGGAAAACTAAAGCTCAAGCAATGTCGCCCTGCATTGCCGGCGATACCCCAGCAGAAATCGTTATGTCAAGCAACCGAGGATCAAAGAAAGCATGCTTTGAATCTTGCCATTGCGACAGCTGCTGCAGCTGAAGTTGCGGTTGCTGCAGCACAAGCAGCAGCCCAGGTCGTTCGTCTGGCTAATGCCTCTAACCACTTCAGTAATTTCACAACAAGGGATAGGAACCGAGCTGCTATTAAGATCCAAACCGCTTTCAGGGCACATCTGGCAAGGAAAGCCCTACGGGCACTAAAGGGA…
Ga13G0853	Ga13G0853.1	GarIQD46	ATGGGAAAATCTCCAGCAAAATGGATCAAGACCTTACTTCTTGGGAAGAAATCTTCAAAGTCCAGTTTCTCAAAAGGAAAAGAGAAGCTGGTGAGGAAGTACTAATTATCTTCAAATATTAAATAGCTTTTGAAATGTTGCATTTTCTAATTTTGTTGATTATTATGTTCAGAAATCTGCAAATAAAGGTGAGGTTTTGGTTTCTTCCAAGGTGACTGTGTCTGACCTATCAGTGGATCCTCCATCAATTTCAGCACCTATTCTAGTGAATAGCGCTAGGAATGTGGTGGACTCTGAGAAGGGTATACCTGCCCAATTGCCAAATGATGGGGCAAATATTCCATCTCCAAAAGTGGATGGAAATGATGCCACAACTGGTAATTTTGGTAACCCAGAAAA…	GarIQD46	MGKSPAKWIKTLLLGKKSSKSSFSKGKEKLKSANKGEVLVSSKVTVSDLSVDPPSISAPILVNSARNVVDSEKGIPAQLPNDGANIPSPKVDGNDATTGNFGNPENPDRIGLDPAAVTVQAAFRGYLARRAFRTLKGIIRLQAVIRGHLVRRQAVATLCCTWGIVKLQALARGQKVRCSDIAMEIQEKHLRLLQGSKSSDSIGVSTSSKVKNLSNNVFVQKLLASSPSVLPLQLQYVPEEPNSSWQWLLRWTMSHFWVSPLKPVRSGKTKRSIQKLSNAKVVNGSSHSTLEHEKNKRGLRRVSGNSAADSVRKHPQNELERVKRSLRKLSDSSKEVSDKSEVFNEKTKKTLKKTSNSNDPDFSEQESAEKIRDVTATLSELSILEADLKMSLEDPSLGE…	GarIQD46	ATGGGAAAATCTCCAGCAAAATGGATCAAGACCTTACTTCTTGGGAAGAAATCTTCAAAGTCCAGTTTCTCAAAAGGAAAAGAGAAGCTGAAATCTGCAAATAAAGGTGAGGTTTTGGTTTCTTCCAAGGTGACTGTGTCTGACCTATCAGTGGATCCTCCATCAATTTCAGCACCTATTCTAGTGAATAGCGCTAGGAATGTGGTGGACTCTGAGAAGGGTATACCTGCCCAATTGCCAAATGATGGGGCAAATATTCCATCTCCAAAAGTGGATGGAAATGATGCCACAACTGGTAATTTTGGTAACCCAGAAAATCCTGATAGGATTGGGCTTGACCCAGCTGCTGTGACGGTACAGGCTGCTTTCAGAGGTTATCTGGCTCGCAGGGCATTTCGA…
Ga13G0857	Ga13G0857.1	GarIQD47	ATGGGGAAATCTCCAGCGAAATGGATCAAGACCTTGCTTCTTGGGAAGAAATCTTCAAAGTCCAGTTTCTCAAAAGGAAAAGAGAAGCTGGTAAGGAAGTATTAATTATCTTCAAATGTGAAATAGCACTTGAAGATTGAAAATGTTGCATATTCTAATTTTTGTTGATTGTCATGGGCAGAATTCTGCAACTAAAGGTGAGGTTTTGGTTTCTTCCAAGGTGTCTGACCTATCAGCGGATCCTCCATCGATTTCAGCACCTATTCTAGTGAGCCGTGTTAGGAATGTGGTGGACTCTGAGAAGGGTATACCTGACCAATTGCCGATTGATGGGGCAAATATTCCATCTCTAAAAGTGGATGGAAATAATGCCACAACCGGTAATTTTGGTAACCCAGA…	GarIQD47	MGKSPAKWIKTLLLGKKSSKSSFSKGKEKLNSATKGEVLVSSKVSDLSADPPSISAPILVSRVRNVVDSEKGIPDQLPIDGANIPSLKVDGNNATTGNFGNPENPDRIRLDPAAVTVQAAFRGYLARRAFRILKGIIRLQPVICGHLVRRQAVATLCCTWGIVKLQALARGQKVRCSDIAMEIQEKHPRLLQGLKSSNSIGVSISSMVKNLSNNVFVQKLLASSPSVLPLQLQYVPEEPNSSWQWLQRWTRSQFWEYPSKPIRSGKTKLSVQKLSNAKAVNGSSHSTLEHKKNKRGLRRVSVNSAADSVWEHPQNELERVKRNLRKLSNSSKEVTDKSEFVNEKTKKTLKKYSSSNDPDVLEQESAEKIRDVTATLSELSILEADLKFSSEDASLGEPI…	GarIQD47	ATGGGGAAATCTCCAGCGAAATGGATCAAGACCTTGCTTCTTGGGAAGAAATCTTCAAAGTCCAGTTTCTCAAAAGGAAAAGAGAAGCTGAATTCTGCAACTAAAGGTGAGGTTTTGGTTTCTTCCAAGGTGTCTGACCTATCAGCGGATCCTCCATCGATTTCAGCACCTATTCTAGTGAGCCGTGTTAGGAATGTGGTGGACTCTGAGAAGGGTATACCTGACCAATTGCCGATTGATGGGGCAAATATTCCATCTCTAAAAGTGGATGGAAATAATGCCACAACCGGTAATTTTGGTAACCCAGAAAATCCTGATAGGATTAGGCTTGACCCAGCTGCTGTGACAGTACAGGCTGCTTTCAGAGGTTATCTGGCTCGCCGGGCATTTCGAATCCTC…
Ga13G1324	Ga13G1324.1	GarIQD48	ATGGGAAGAGCAAGCAAATGGCTGATAAGCTTCTTGTTAGGAAGGAAAGATGATAAAGGTAAATGGAAGAACATTTCCAAATCTTTTGAAGATCAAGGAAGTTTGATGGCAATCCCATCTGCAATTCCACCTGCAAGTCCTTTTAGGTGCTTATGGAGTTTTCGGAAGCCGGTGGCCGCGTCTGAAGTTCGAGCTCTTAAAGGTTCGAGGTCTTTCGGTTCAATGATTGCTACTTCACTTGCAAAACCAGCTGTATTGGACATGGAGAATCAACATGCCAAGACCAGAGTCTCTTCAGTGGCAATATCTAAAGCAATAGAAGATGTCGCTGCAACGCGGATTCAAGCTGCCTTTCGATCGTATTTGGTACTAAATTACGAATCCTGGGATTTATTATAG…	GarIQD48	MGRASKWLISFLLGRKDDKGKWKNISKSFEDQGSLMAIPSAIPPASPFRCLWSFRKPVAASEVRALKGSRSFGSMIATSLAKPAVLDMENQHAKTRVSSVAISKAIEDVAATRIQAAFRSYLARKALHALKGLVKLQALVRGQLVRKQATSTLRSMHALMAIQVRARIHRIQMAAEPRLNPKSILLRYGRFPLEKEFKRAQKDEQHGTFKSSKVETLEQRDPKNYFEELSKQNYKEFSFTTYNSPRHCPPLKSKPTPARSSFSSNEYHYMANTQFQGPKSGHKVNPNNDLHPTSKLKAKEGLQLKK	GarIQD48	ATGGGAAGAGCAAGCAAATGGCTGATAAGCTTCTTGTTAGGAAGGAAAGATGATAAAGGTAAATGGAAGAACATTTCCAAATCTTTTGAAGATCAAGGAAGTTTGATGGCAATCCCATCTGCAATTCCACCTGCAAGTCCTTTTAGGTGCTTATGGAGTTTTCGGAAGCCGGTGGCCGCGTCTGAAGTTCGAGCTCTTAAAGGTTCGAGGTCTTTCGGTTCAATGATTGCTACTTCACTTGCAAAACCAGCTGTATTGGACATGGAGAATCAACATGCCAAGACCAGAGTCTCTTCAGTGGCAATATCTAAAGCAATAGAAGATGTCGCTGCAACGCGGATTCAAGCTGCCTTTCGATCGTATTTGGCAAGGAAAGCATTGCATGCTTTGAAGGGATTA…
Ga13G2105	Ga13G2105.1	GarIQD49	ATGGGAAAGGCAAGCAAATGGTTAGTAAACTTCTTGCTAGGGAGAAAAGATGATAAAGGAAAAAGGAAGAATTTGTCCATATCTTTTGATGAAGAGAATTTGGTTTCATCCCCATCCGCAACTCCATCGTCCGCATCTTCGTTTAAGCGGAGATGGAGTTTTGGGAAGTTGTCGAGTAAAGATCGAGCTCATAAGAGTTCCCGGTCACTTGACTCAATGATTGCAACTCCACTTTTGAAGCAAGCTGTATTCAATATGGAGATCCGGCATGATAACAAGAGGGTTTTCACAATGGCCATGATGAATTCTAGCAGAAGGAAAACAAAAGCAAGATATGCAGCAGTGGAAAATGCGGCAGCGACCCAGATTCAAGCCGCTTTTCGTTCGTATTTGGTAATG…	GarIQD49	MGKASKWLVNFLLGRKDDKGKRKNLSISFDEENLVSSPSATPSSASSFKRRWSFGKLSSKDRAHKSSRSLDSMIATPLLKQAVFNMEIRHDNKRVFTMAMMNSSRRKTKARYAAVENAAATQIQAAFRSYLARKALHALRGLVKLQALVRGYLVRKQTTATLRSMHALMSIQVRARFQRIQMADQSQLDVKSQSLRYGRFLQEMEFKRSQREGINEKHGLVKSQNGLMNHSQMERIEQGIIKYYSGELPILKRQPKHEEFSFTTHNSPRHSPPTSKATPARSSFSSHDYPYMPSYMANTQSSRAKLRSQSEPRQRPALNFKAKSKRITSAEEMDDDILPRYSFSQSKGVADEHQDPWIVKLYQSTIKPKMDTSSYK	GarIQD49	ATGGGAAAGGCAAGCAAATGGTTAGTAAACTTCTTGCTAGGGAGAAAAGATGATAAAGGAAAAAGGAAGAATTTGTCCATATCTTTTGATGAAGAGAATTTGGTTTCATCCCCATCCGCAACTCCATCGTCCGCATCTTCGTTTAAGCGGAGATGGAGTTTTGGGAAGTTGTCGAGTAAAGATCGAGCTCATAAGAGTTCCCGGTCACTTGACTCAATGATTGCAACTCCACTTTTGAAGCAAGCTGTATTCAATATGGAGATCCGGCATGATAACAAGAGGGTTTTCACAATGGCCATGATGAATTCTAGCAGAAGGAAAACAAAAGCAAGATATGCAGCAGTGGAAAATGCGGCAGCGACCCAGATTCAAGCCGCTTTTCGTTCGTATTTGGCAAGG…
Ga13G2341	Ga13G2341.1	GarIQD50	ATGGGTTCTTCAGGGAAGTGGGTGAAATCTCTTATGGGTGTCAAGAAGAATGAAAAAGAAGACCAAGTAAGCTCCGGGTTTTTTTCTGCTTTGTTTCACAGCTACTATTATTTACATTTCTGCACCTAAGCTCTTTGTTATGAAGGAAAAAATGGGTGTCAAGAGTAAGAAATGGAAGCCATGGGGCTCTAAAGGGAAGTTCAGATCAGATTCTTCACCAAGGACTGCTGCAATGGCAGCACTAGCCCGAGCTCCTGCTAAAGATATCAGGGTTTTAAGGCAAGAAGGGGCTGCCATCCACATCCAAACTGCTTTTCGTGGTTTCTTGGTAAATTGCAAACACCCGTGTTAGTCTCATAATTTTCATTTCTTTCATTGTTTGGTGTCCGTGAAAGTGAA…	GarIQD50	MGSSGKWVKSLMGVKKNEKEDQEKMGVKSKKWKPWGSKGKFRSDSSPRTAAMAALARAPAKDIRVLRQEGAAIHIQTAFRGFLARRALRALKGIVRLQALVRGRQVRKQATVTLRCMQALVRVQSRVRARRVRMSTEGRAVQKILDECHSKDDILKQAEDGWCDSKGTLEDAKTKLQMKHGGAFKRERALAYYLAQKQWRSKPGSTSQTNNSGLYTKYQEFDKNSWGWSWLERWMAARRWETRLMEPSQAESDPSDTTSPSKHYLEGKNARSSSPCFVEVRKNNISTRISAKPPNIGQVTHSSSSPSSEFRFNSSSASSSICTSSTPVSGNTTLNSTDKTEQSGNSRPDYMNLTESTKAKQRSRNKHVHMSRPPYPSTN	GarIQD50	ATGGGTTCTTCAGGGAAGTGGGTGAAATCTCTTATGGGTGTCAAGAAGAATGAAAAAGAAGACCAAGAAAAAATGGGTGTCAAGAGTAAGAAATGGAAGCCATGGGGCTCTAAAGGGAAGTTCAGATCAGATTCTTCACCAAGGACTGCTGCAATGGCAGCACTAGCCCGAGCTCCTGCTAAAGATATCAGGGTTTTAAGGCAAGAAGGGGCTGCCATCCACATCCAAACTGCTTTTCGTGGTTTCTTGGCAAGAAGAGCTTTGAGAGCTTTAAAAGGAATCGTGAGGCTTCAAGCATTAGTTCGCGGCCGACAGGTGAGGAAACAGGCCACCGTAACGCTTCGGTGTATGCAAGCTCTCGTTCGTGTCCAATCTCGTGTTAGGGCTCGTCGTGTGCGG…

## Sheet: Gba
Genome Wide Identification, Classification and Functional Characterization Analysis of IQD gene family in Diploid and Tetraploid Cotton (Gossypium) Abdul Rehman1,2,3, Zhen Peng2, Hongge Li2, Guangyong Qin1, Yinhua Jia2，Zhaoe Pan2，Shoupu He1,2, Abdul Qayyum3 and Xiongming Du1,2*, 1Zhengzhou Research Base, State Key Laboratory of Cotton Biology, Zhengzhou University, Zhengzhou 450000, China. 2State…
Gene ID	Principle Transcript ID	Rename	Genomic	Rename	Proteins	Rename	CDS
GB_A01G0542	GB_A01G0542.1	GbaIQD01	ATGGGTTCAGGAAACTGGCTTAGATCATTCATTTGTTTAAAGAAATATAAACCAAACAGATCCAAACAAGCAAAGGTAGTACATGTGTTTTGGAATGACGCATTAATCCAACATATTGCTCGTGTTAGACACTGCATATCACTAATATGGTCACAGACCCCATCAATACAGGTACACTCGAGTAATGAAAAATCAAATGGTGATGAAAGGGTAGAAGAACATGAGGGTCCTGAAGTGGCAGCGGCTTGGAGTTCACAAAGCAGTCCTGGAATTGCCGTTGAACAAAGAGCGGCTGCTAAAATTCAGAAGGCATTTCGGTCTTACAGGGTATTTTTAATTTTTTGCCAAATTCCAATTTCATACATATTTCCAAGTGGAATTACCTTTTAAGAGATCAAA…	GbaIQD01	MGSGNWLRSFICLKKYKPNRSKQAKTPSIQVHSSNEKSNGDERVEEHEGPEVAAAWSSQSSPGIAVEQRAAAKIQKAFRSYRARKAVRRLRDAGRFKNILIQGHTVKKQTTSTLSYLHSWCNVQSQIRARRICMVTEGRLKQKKMENQMKLEAKLHELEVEWCGGSETMEEILSRIQQREEAAVKRERAMAYAFSHQWRANASQYLGQASYGAGKENWGWSWIERWIAARPWEVRIHSQPIHPKKTHGRQASKSEKEMKVSASVKPCLPNGKVAPKAKNGAPSDG	GbaIQD01	ATGGGTTCAGGAAACTGGCTTAGATCATTCATTTGTTTAAAGAAATATAAACCAAACAGATCCAAACAAGCAAAGACCCCATCAATACAGGTACACTCGAGTAATGAAAAATCAAATGGTGATGAAAGGGTAGAAGAACATGAGGGTCCTGAAGTGGCAGCGGCTTGGAGTTCACAAAGCAGTCCTGGAATTGCCGTTGAACAAAGAGCGGCTGCTAAAATTCAGAAGGCATTTCGGTCTTACAGGGCAAGAAAAGCAGTCCGCCGGCTGAGAGATGCGGGGAGATTCAAGAACATATTGATACAGGGACATACAGTGAAGAAACAAACAACAAGCACGCTAAGCTATTTACATTCATGGTGCAATGTCCAGTCTCAAATCCGAGCTCGGAGAATATGT…
GB_A01G1109	GB_A01G1109.1	GbaIQD02	ATGGGAAAATCCACTTCCTGTTTCAAACTCATCACTTGCGGCAGCGATTCCGCTGAAAAAGACGACGCCATTGATGTCCCTGAGGTAAATTACGGCTGCATTTTCCCCCTTTTTTTTGTTACTTTGCTTTGAATTAGTATTTCATCTGCTGTTTCGAATTGCATTTCACCTTTTAGTTTAATTTTTGGATTTGGTCGAGGAATGGGAGTTTGAAAACTTGTCTTACACCAGAATTTTAAGATCTGAGAATTCCTGCCTTAGCATTTTTTATCAGCAATGTCTAAGCTGCCTTTTTTAACTCTGATTATTTTCCATAATTTTTTAAATGCAAATAGTTTTCTCGGTATCAAGTTTCGAAACTCTCAAAGGTTTTTAAAATTTATCTTCTTTTAACTGGTT…	GbaIQD02	MGKSTSCFKLITCGSDSAEKDDAIDVPENKRSSDKKGWSFRKRSERHRVLSNSVIQVTTTTGLKESQDSDGFEFQQQDVSVASEKTSTVQYTEEKPQLMTPKEYIEEKSQLVALKEYTEEKSHSLTPIELAEEKSQLLAPIKCTEEKSQLTPEPEESKVPEPITATTNEAEDDFSLDESVVVIIQTAIRGFLAQKELGKLKNLVKLQAAVRGHLVRRHAVGTLRCVQAIVKMQLLVRARQSQEGSYVEKLDGKHQEVNQRLGNSATKKNLTYNSMEKLLSNRFARQLMDSTPKTKTIHFKCDSSKPNSAWSWLERWMSLSSSEKASKAELPIEQPEQKNTEDCDSPRTPAVPSENISASNEPKPHVRETMVSSESEDNLITHDAANFKFEACQPSSSSV…	GbaIQD02	ATGGGAAAATCCACTTCCTGTTTCAAACTCATCACTTGCGGCAGCGATTCCGCTGAAAAAGACGACGCCATTGATGTCCCTGAGAATAAGAGATCAAGTGACAAAAAGGGATGGAGTTTTCGGAAGAGATCTGAACGGCATCGAGTGCTTAGCAACTCTGTGATACAAGTAACTACCACTACAGGACTTAAGGAAAGTCAAGACTCTGATGGTTTTGAGTTTCAACAGCAAGATGTCTCGGTTGCTTCTGAGAAAACCTCCACTGTTCAGTACACTGAAGAGAAACCTCAGCTGATGACACCAAAAGAGTACATTGAAGAAAAATCCCAGTTGGTGGCACTGAAAGAGTACACAGAAGAAAAATCTCACTCGCTGACGCCTATAGAACTTGCTGAAGAA…
GB_A01G2437	GB_A01G2437.1	GbaIQD03	ATGGGGAAGAAAATAAAATGGCTATCTTCTTTAAAGAAAGCCTTCAATCCAGAGTCAAAGGAAAAGAAAAATCAGGTTTGAAAATTTTCAATTCAGTCCATAATTCATGTTAAATTTCTGGTCAACCCACATGTACTTAAATTTTTATGTTTTCTTTGGGGTCAATTTGTGATTTTGATCCTTTTGTTATACTGAAATTTGAGATTTGTTTAATTTGGTATAAGGCGTCGATTATTTAGACTAATGAGATTATAAAAGGTTAAAGTACCTAGGAAGTCCCTGTATTATAGGGGCTGGATCAAATTCGTCCCTCTATTGTTAAATGAATTAATTGAGTCCCTATACTATTACAAAGAATCAAATGATACCAAAAAAAATGTCTTAAATTTTCTTTTCAAT…	GbaIQD03	MGKKIKWLSSLKKAFNPESKEKKNQILDKQVHLGPSSSNAAAPTLETVNLSPPPQPEDEKIIKPETVAEATDDDVVVAPAVPTPAAVTVVQRRLNIDSRFAGKSMEEVAAIKIQTAFRVYMAKRALRALRGLVRLKSLMEGPAVKRQVTSTLRCMQTLSRVQCQIRMRRIRMTEENQALQRQILQKHAKELVNLQMGEDWDDSLQSKEQIEASLLSKHEAAMRRERAMAYSFTHQQTWKNGSKSMNPLFMDMNNLTWGWSWLERWMAARPWEGRGVTGKEPNNDQSSVKSAHFEGEISKAYARYQLNLDNKQSPKSSQKPNRTSSHLSPSPKPPSTPSPKLKSASPSGSIIAQDDDTRSIVSAQSERNRRHSIAGSLVRDDESLASSPSLPSYMVPTKS…	GbaIQD03	ATGGGGAAGAAAATAAAATGGCTATCTTCTTTAAAGAAAGCCTTCAATCCAGAGTCAAAGGAAAAGAAAAATCAGATTTTGGATAAGCAAGTGCATTTGGGTCCTAGTAGTTCTAATGCGGCTGCACCCACATTAGAAACTGTTAATTTGTCCCCTCCACCTCAGCCGGAAGATGAGAAAATAATCAAACCCGAGACGGTTGCTGAAGCTACCGATGATGATGTTGTTGTTGCTCCAGCTGTTCCGACCCCGGCTGCTGTTACGGTCGTTCAACGCCGACTTAATATAGACTCTCGGTTTGCTGGAAAATCTATGGAGGAAGTTGCAGCGATCAAAATTCAGACAGCTTTTCGAGTTTACATGGCGAAAAGAGCATTGCGTGCTTTACGAGGACTTGTG…
GB_A02G1412	GB_A02G1412.1	GbaIQD04	ATGGGGAAGACTACAAGGTGGCTCAAGTCAGTTTTAGGCATGAAAAAGGAAAAAGAAAAAACCCCCATTCAGCATTCTGTTTTATACGACAAGAATGACAAGAAAACGTGGAGTTTTGCCAAGTCCGGGAAAGATGTCGACGCAAATTCTCAAACCCCATCGGCCGTCACTGATGCCGCTTGGCTTAGGTCCTACTTTGCCGAAACCGAGAAAGTGCAGAACAAACATGCCGTTGCTGTGGCTGCTGCTACAGCAGCTGCAGCCGATGCAGCTATGGCAGCAGCACAAGCTGCCGTCGCAGTCGTCAGGCTGACCAGCAATGCTAGAGCTTCTTTCTTTGCTGGAGGGAAGGAGAAGTGGGCAGCTGTTAAAATTCAAGCCGCCTTTAGAGGTTACTTG…	GbaIQD04	MGKTTRWLKSVLGMKKEKEKTPIQHSVLYDKNDKKTWSFAKSGKDVDANSQTPSAVTDAAWLRSYFAETEKVQNKHAVAVAAATAAAADAAMAAAQAAVAVVRLTSNARASFFAGGKEKWAAVKIQAAFRGYLSRKALRALKGLVRLQALVRGYLVRKRAAATLHSMQALIRAQSAVRSQRMRRSFNKENRYHPENQPRKSIERFDEWRSEINAYDDNPKIVEIDTLKTRSRSHRFNTALSECGDDLPYQTISSPLPRLVPPRTSLPHYQNLNDFEWCFSGGDECRFATAHNTPRFGNAGRSNAPTTPTQSVCGDGYFKPYSNFPNYMTNTQSFKAKLRSYSAPKQRPESGGAKKRLSHNEIMAARNSISGVRMNKSYYQIHHQF	GbaIQD04	ATGGGGAAGACTACAAGGTGGCTCAAGTCAGTTTTAGGCATGAAAAAGGAAAAAGAAAAAACCCCCATTCAGCATTCTGTTTTATACGACAAGAATGACAAGAAAACGTGGAGTTTTGCCAAGTCCGGGAAAGATGTCGACGCAAATTCTCAAACCCCATCGGCCGTCACTGATGCCGCTTGGCTTAGGTCCTACTTTGCCGAAACCGAGAAAGTGCAGAACAAACATGCCGTTGCTGTGGCTGCTGCTACAGCAGCTGCAGCCGATGCAGCTATGGCAGCAGCACAAGCTGCCGTCGCAGTCGTCAGGCTGACCAGCAATGCTAGAGCTTCTTTCTTTGCTGGAGGGAAGGAGAAGTGGGCAGCTGTTAAAATTCAAGCCGCCTTTAGAGGTTACTTG…
GB_A02G2037	GB_A02G2037.1	GbaIQD05	ATGGGCACTGCTAGAAACTGGTTCAACACAGTTAGAAAGAAGTTCATCAAATCATCCCACCAAAGAGATATCGTCATCCCTCATAGCGAAAATCTCAGCCAGCAGTCAATGATCAAAGAAGTTAGAGACTTCCCCAACATTTCACCTTCATCGAGATCATCATTTCAGACAAAAAATTTAACCAGAGAGGATATTGCAGCAATTAAGATCCAATCAGTTTTCAGGGGTCATCTTGTAACTACGATAACTTATATTTCTTTTTCAAACACTTTAGATGTAAACTAACCATTTCGTGTTCTCGAATGATGGACAGGCAAGACGAGCATATAGAGCATTGAGAAGCCTGGTTAAGCTGCAAGCAGTGGCCCGAGGGGCGTATGTAAGGAAACAAGTACAAAT…	GbaIQD05	MGTARNWFNTVRKKFIKSSHQRDIVIPHSENLSQQSMIKEVRDFPNISPSSRSSFQTKNLTREDIAAIKIQSVFRGHLARRAYRALRSLVKLQAVARGAYVRKQVQIAMNCMHALVRLQVKVRARQLLAGHNLFHRKVSNTTTIRVLFSQDCKQQEKFKVIIQECDHDEQNSLEDPCYRLQKQKK	GbaIQD05	ATGGGCACTGCTAGAAACTGGTTCAACACAGTTAGAAAGAAGTTCATCAAATCATCCCACCAAAGAGATATCGTCATCCCTCATAGCGAAAATCTCAGCCAGCAGTCAATGATCAAAGAAGTTAGAGACTTCCCCAACATTTCACCTTCATCGAGATCATCATTTCAGACAAAAAATTTAACCAGAGAGGATATTGCAGCAATTAAGATCCAATCAGTTTTCAGGGGTCATCTTGCAAGACGAGCATATAGAGCATTGAGAAGCCTGGTTAAGCTGCAAGCAGTGGCCCGAGGGGCGTATGTAAGGAAACAAGTACAAATAGCAATGAATTGCATGCATGCACTTGTCAGGTTACAGGTCAAGGTTCGTGCCCGCCAACTCCTCGCAGGTCATAACCTT…
GB_A03G0230	GB_A03G0230.1	GbaIQD06	ATGGGTAAAGCTTCCAAGTGGTTCCGCAGCATCCTCGGCTTCAAAAAATCCGAACCCCATAACCAACCTTCTTCTTCTTCAAAACCAACTTCCCATAAAGACAAACGGCGTTGGAGTTTCGTCAAATCGTACCGTGAAAAAGACTCCTCCACGAACAGTAGTAATGGGAAGTTGCCGTCGTCTTCGCAGCAACTGAAAGACTCTGTTTCCTTCGTTGAAAGGAAAGGTGACAATGAAGTAACGGATCCTAGCAAGCACGCCATCGCTGTTGCTGCCGCCACTGCCGCCGTTGCCGAAGCAGCCGTTGCGGCTGCTCAAGCTGCCGCTGCAGTGGTTAGGCTCACTAGTAACGGTGGTAGGTGCGCTCGTGAATCGGCAGCGGTTCACGTTTGCAACAAC…	GbaIQD06	MGKASKWFRSILGFKKSEPHNQPSSSSKPTSHKDKRRWSFVKSYREKDSSTNSSNGKLPSSSQQLKDSVSFVERKGDNEVTDPSKHAIAVAAATAAVAEAAVAAAQAAAAVVRLTSNGGRCARESAAVHVCNNNSYIAHEESSAIKIQSAFRGYLARRALRALKGLVRLQALVRGHIERKRTAEWLRRMQALLRAQARARAGRAQISESSQSSCKSSHFHHPDPATPEKFEHVSRSQGTKYEQSSMLKRNGSKSSGRTVDNQEKLHSGWYCRVDEQTWVHSTRIGPNDDEKNDKILEVDTGKPNFISKRRNLFHSTHLSLNSDLYSCSFTNSRDSHQTAPSPSSGEVQSLTPLMLSHSEAIQESPFCDAVDDNSPQFYSASSKGASSKRSPFTPAKSDG…	GbaIQD06	ATGGGTAAAGCTTCCAAGTGGTTCCGCAGCATCCTCGGCTTCAAAAAATCCGAACCCCATAACCAACCTTCTTCTTCTTCAAAACCAACTTCCCATAAAGACAAACGGCGTTGGAGTTTCGTCAAATCGTACCGTGAAAAAGACTCCTCCACGAACAGTAGTAATGGGAAGTTGCCGTCGTCTTCGCAGCAACTGAAAGACTCTGTTTCCTTCGTTGAAAGGAAAGGTGACAATGAAGTAACGGATCCTAGCAAGCACGCCATCGCTGTTGCTGCCGCCACTGCCGCCGTTGCCGAAGCAGCCGTTGCGGCTGCTCAAGCTGCCGCTGCAGTGGTTAGGCTCACTAGTAACGGTGGTAGGTGCGCTCGTGAATCGGCAGCGGTTCACGTTTGCAACAAC…
GB_A04G0991	GB_A04G0991.1	GbaIQD07	ATGGGAAAGAAAGGGAAATGGTTGTCCTCTCTAAAGAAAGCCTTCTTCTCAGAGTCCAAGGGAAAGAAAAACCAGGTTAGGATAAGTCTTGTTCAGCTAAAAATCATCTGCAGTTTCATGGTTAGCTCAGTTTTTAGTATTCTTGATTACTATGTTTCTCAGAAATCAAAAGAACATTTTTGGAGAAGAAGGTGCATCTGGATCCCACTGGTTCTGATGCAGCCAAGTTATCCCTACTTCCTCAGCCTGAAGAGGTGAAATTAATTGAACCTGAAGTTGAGCAAAGCAAGCAGACTTACCCTGTGGCAGTTGCCAATTCTGCTGCGGTTCAAGCTCTGGTTGCTCTGCAGGCCATTCGACATCAACTTAATACAGATGCTAGGTTTGCCGGAAAATCTA…	GbaIQD07	MGKKGKWLSSLKKAFFSESKGKKNQVRIKIKRTFLEKKVHLDPTGSDAAKLSLLPQPEEVKLIEPEVEQSKQTYPVAVANSAAVQALVALQAIRHQLNTDARFAGKSKEEVAAIKIQAAFRAYLAKRALRALRGLARLKSLMEGIAARRQASGSLRCMQTLSRMQCQIHARRTRMMEENQALQRQLLQKLAKEIVNLQMGEDWDDSVRSKEQIEASLLSKHEAAMRRERTMAYSFTHQQTWKNASRSMNPLFMDPSNPSWGWSWMERRMTARPWEVRGGMRDREHLDDQSSLKSARSNFGGEISKAYARYQLNLDKQSPKANQKPSRTSSLLSPSTPKSASIPARKLKSASPRSGVAGLDDETRSIVSMKSDRNRRHSIAGSSVRDNESLANSPSLPSY…	GbaIQD07	ATGGGAAAGAAAGGGAAATGGTTGTCCTCTCTAAAGAAAGCCTTCTTCTCAGAGTCCAAGGGAAAGAAAAACCAGGTTAGGATAAAAATCAAAAGAACATTTTTGGAGAAGAAGGTGCATCTGGATCCCACTGGTTCTGATGCAGCCAAGTTATCCCTACTTCCTCAGCCTGAAGAGGTGAAATTAATTGAACCTGAAGTTGAGCAAAGCAAGCAGACTTACCCTGTGGCAGTTGCCAATTCTGCTGCGGTTCAAGCTCTGGTTGCTCTGCAGGCCATTCGACATCAACTTAATACAGATGCTAGGTTTGCCGGAAAATCTAAGGAGGAAGTGGCGGCAATCAAAATTCAAGCAGCTTTCCGAGCTTACCTTGCAAAAAGGGCATTGCGTGCTTTAAGA…
GB_A05G0265	GB_A05G0265.1	GbaIQD08	ATGGGGAGAGCTTCAAGGTGGCTGAAGAGCTTGTTTGGGATAAAGAACAGCAAAAACAGCTTCAATCCCAGAGACGGGAAAGACAAGAAAAACGGCAGCATTGACCATTCAGTGGGTGATTCAAGCATTTCCCCAGAAAAGGTTGCGTGGTTAAGATCGTGCTATAATGAAACAGAGAGGGAGCAGAACAAGCACGCCATTGCTGTGGCTGCCGCCACTGCTGCTGCGGCGGATGCAGCAGTAGCCGCCGCGCAGGCTGCAGTGGCGGTGGTGAGACTGACTAGTCATGGTAGAGGGACCATGTTTGGTGGTGTACATGAGAAGTGGGCTGCTGTCAAGATTCAAACAGTTTTTAGAGGTTATCTGGTAAGTAAGTAGAGTTTTTATTTCTTAATTTAT…	GbaIQD08	MGRASRWLKSLFGIKNSKNSFNPRDGKDKKNGSIDHSVGDSSISPEKVAWLRSCYNETEREQNKHAIAVAAATAAAADAAVAAAQAAVAVVRLTSHGRGTMFGGVHEKWAAVKIQTVFRGYLARKALRALKGLVKIQALVRGYLVRKQASATFHSMQALMRAQATIKSQKARAIINNDAIRFDIRARKSMERFDDTRSEDTVSIHSRRLSASLDIDESPKIVEVDTGIKPKARSRRTNTSISDFIDDHTYQTLPSPLPCRCPARLSIPDSRHYQDIDWGFSGDECRFSTAHSTPRFINSCAPATPAKSVSGHNFFRPCGDSPNYMANTQSFKAKLRSHSAPKQRPEPGPKKRLSLNEMMESRSSLSGVKMQRSCSRAQEAIHFKNAVMGKLDRSLEFGK…	GbaIQD08	ATGGGGAGAGCTTCAAGGTGGCTGAAGAGCTTGTTTGGGATAAAGAACAGCAAAAACAGCTTCAATCCCAGAGACGGGAAAGACAAGAAAAACGGCAGCATTGACCATTCAGTGGGTGATTCAAGCATTTCCCCAGAAAAGGTTGCGTGGTTAAGATCGTGCTATAATGAAACAGAGAGGGAGCAGAACAAGCACGCCATTGCTGTGGCTGCCGCCACTGCTGCTGCGGCGGATGCAGCAGTAGCCGCCGCGCAGGCTGCAGTGGCGGTGGTGAGACTGACTAGTCATGGTAGAGGGACCATGTTTGGTGGTGTACATGAGAAGTGGGCTGCTGTCAAGATTCAAACAGTTTTTAGAGGTTATCTGGCTCGAAAAGCATTACGAGCTTTGAAAGGATTG…
GB_A05G0793	GB_A05G0793.1	GbaIQD09	ATGGGTGTCTCAGGAAAATGGATCAAAGCACTAGTGGGCTTGAAGAAATCAGAAAAGTCTCAATCTTCAGAGAAAGTAGAAAATGTTAGTTTGAATGTTGCGAATTTTTTTTGCCCTTCTGTAGGTTTAGATTTGGCTTCATGCTTGTGTCACAACCCACACACAATATCCTGGCTTGTGACATGTACATCATGGCACGTGTGCCTCTTCAAAATGCTGAAGTATTATCAAATGTCAGAAAGTATCTTCTGTGCGCACTTGTAGCTAGATGATCATGTTTTTGGAGTAATGCATTTTTCGTTGACTTATGGCTTAGCTGAGTTGTTGACTAATCCGGTACATACAAGGAGTATTATGTAGTAACTTACATGCAGTAGCTTTCCTTGTTAGCCTAATCAA…	GbaIQD09	MGVSGKWIKALVGLKKSEKSQSSEKVENRATGSKFRHRRKHSVEFDTNELQEELDENAASLAENATCATIDAAGCPSDALEVHDAPLNEHAREEWAATRIQTAFRGFLARRALRALKGLVRLQALVRGHAVRKQAAITLRCMQALVRVQARVRARRVRLALENQTAQQKLQQQLANEAHVKEIEEGWCDSIGSVEEIQAKLLKRQEAAAKRERAMAYALAHQWQAGSRQQSVPAGFEPDKSSWGWNWLERWMAVRPWENRFLDINLRDGVKIREDSPAEGKNDASSQIKPAIGKPAASSLHANLSNKKTGPSHFDGSDSPPGKSACVLEAVNAPSSKPKSKPNREDSVEEAGSGPVISSRSHSNPKERRTQSDKLAKRRLSMPNTGGVIVSQTTKLSKT…	GbaIQD09	ATGGGTGTCTCAGGAAAATGGATCAAAGCACTAGTGGGCTTGAAGAAATCAGAAAAGTCTCAATCTTCAGAGAAAGTAGAAAATAGAGCAACTGGTAGCAAATTTCGTCACCGAAGAAAGCATTCGGTTGAGTTTGATACAAATGAACTTCAAGAAGAGTTGGATGAGAATGCTGCTTCACTAGCTGAAAATGCTACTTGTGCAACTATAGATGCTGCTGGCTGTCCTTCTGATGCACTTGAAGTGCATGATGCACCTCTTAATGAACATGCAAGGGAAGAATGGGCTGCCACGAGGATACAAACTGCTTTCCGAGGATTTCTGGCCAGAAGAGCACTGCGAGCATTAAAAGGATTGGTAAGACTGCAGGCCCTTGTCAGGGGTCATGCTGTAAGAAAA…
GB_A05G1347	GB_A05G1347.1	GbaIQD10	ATGGGGAAAGCTGCAAGGTGGCTGAAGGGGTTATTGGGCATGAAAAAGGAGAAAGATAAAGACCGGATAGAGCAATATTCATCTGTTTTATCCGATAAAAAAGAGAGGAAAAGATTTAGTTTTGGCAAATCCAGCAAAGGTGTCAGTGAAATTTCTCAGAGTCCAAGCAATGTTTCCACGACTACAGATGCTGCTTGGCTCAGATCCTACATTGCTGAAACTGAGAAAGACCAAAACAAGCATGCAATTGCAGTGGCTGCTGCCACCGCAGCTGCAGCTGATGCCGCCGTGGCCGCAGCAAAGGCGGCAATGGCAGTGGTGAAGCTAACCAGTAATGGACGAACCAGTTTGGTTGGTGGAGGGAGGGAAAGGTGGGCAGCTATGAAAATTCAAAGCGTC…	GbaIQD10	MGKAARWLKGLLGMKKEKDKDRIEQYSSVLSDKKERKRFSFGKSSKGVSEISQSPSNVSTTTDAAWLRSYIAETEKDQNKHAIAVAAATAAAADAAVAAAKAAMAVVKLTSNGRTSLVGGGRERWAAMKIQSVFRGYLSRKALRALKGLVRLQALVRGYLVRKRTIATLHSMQALLRAQTTVRSQRIHRSFNKDHSCCLEHKPRSSIERFDEPRSVIHSKRLSASMETNAYDDSPKIVEIDTFKTRSRSRRFNLNALSECGDDFASHTNTSLLCPVPVRTSTPHHQNVDDFEWCFADDECRLSTAQSTPRFANPVRTPIAPATPLSVCGEGYFRRPHSNLPNYMAKTQSFKAKLRSHSAPKQRPEPGAKKRLSLNGLMAARNSISGVRMNTSCYQVDEG…	GbaIQD10	ATGGGGAAAGCTGCAAGGTGGCTGAAGGGGTTATTGGGCATGAAAAAGGAGAAAGATAAAGACCGGATAGAGCAATATTCATCTGTTTTATCCGATAAAAAAGAGAGGAAAAGATTTAGTTTTGGCAAATCCAGCAAAGGTGTCAGTGAAATTTCTCAGAGTCCAAGCAATGTTTCCACGACTACAGATGCTGCTTGGCTCAGATCCTACATTGCTGAAACTGAGAAAGACCAAAACAAGCATGCAATTGCAGTGGCTGCTGCCACCGCAGCTGCAGCTGATGCCGCCGTGGCCGCAGCAAAGGCGGCAATGGCAGTGGTGAAGCTAACCAGTAATGGACGAACCAGTTTGGTTGGTGGAGGGAGGGAAAGGTGGGCAGCTATGAAAATTCAAAGCGTC…
GB_A05G1386	GB_A05G1386.1	GbaIQD11	ATGGGTGCCTCAGGAAAATGGTTTAGATCACTTGTTACTTTGAAACCACTTCATGAACCCATTAACCATGTATTTTTCTTCAATCCCATAACTAAGTTTCTAATTTTCTGGAACTCCTTTTTTTTCTTCGTGCTTTCAGTGTTTTTATTTTTTATAATTTTTTTTTTGTAGGAGAAAATGGGAGATAATAAGTCCAAGAAGAAATGGAAACTATGGAGGAGCTCATCAGAAGGGTTCGGATCCTCCTCATCCAAGAGTTACAAAATGCGGCACGTGGTAGCTGGTCCACAGGCCTCCGATTCTTCTTTCATAGCTGATGATCTGCTTGCCGCTGCCATGGCTACCATTGTTCGTGCTCAACCCAAAGATTTCAGAGCTGTGAAGCGTGAATGGGCCGCC…	GbaIQD11	MGASGKWFRSLVTLKPLHEPINHEKMGDNKSKKKWKLWRSSSEGFGSSSSKSYKMRHVVAGPQASDSSFIADDLLAAAMATIVRAQPKDFRAVKREWAAIRIQTAFRGLLARRALRALKAVVRIQAIFRGRLVRKQAAVTLRCMQALVRVQARVRAQCLVSSEEQSLHKLDDPTKEAEKGWCDIPGTLEEVKAKQQMRQQGAKKRERAMAYSVSRSYGNGSPNFRANKQQPLSRRHHQRLHRDNPDWDWLDRWMSTKPWETRTIEEPDSTVSRKSEDNIVSFHSNSSDQRDSLKRKTKNPKTSILTRPANQTSGSTSAPSSESVYDKSSTSTSTASVSPTTLSSNTIVVGTLNDSNHTQKPSYMNPTESIKAKQKTLKFSSSDNMRRHVVDDDDDDDLQ…	GbaIQD11	ATGGGTGCCTCAGGAAAATGGTTTAGATCACTTGTTACTTTGAAACCACTTCATGAACCCATTAACCATGAGAAAATGGGAGATAATAAGTCCAAGAAGAAATGGAAACTATGGAGGAGCTCATCAGAAGGGTTCGGATCCTCCTCATCCAAGAGTTACAAAATGCGGCACGTGGTAGCTGGTCCACAGGCCTCCGATTCTTCTTTCATAGCTGATGATCTGCTTGCCGCTGCCATGGCTACCATTGTTCGTGCTCAACCCAAAGATTTCAGAGCTGTGAAGCGTGAATGGGCCGCCATTCGAATTCAGACTGCATTTCGCGGCTTGCTGGCAAGACGAGCTTTGAGGGCATTGAAAGCAGTAGTAAGGATTCAAGCCATATTCCGTGGTCGTCTAGTC…
GB_A05G1598	GB_A05G1598.1	GbaIQD12	ATGGGTTCTGGAAACTTGTTCAAGTCAATAATAAATATAGTGAAAGATGACAACTCAAAGAAAGTAAAGGTACATTCTCAAACAGTCATAAACTAAGCTATGCAAGTCTCTACATTCCAGTTATAAATAAACCTAAGATTGCTTCTCTAGTCATTGATTTGCAATTTGAATCCTTGGGTTAATATTATCTATGATCTCGTCTGTTTGGCACAGGGATCTTCTGCTTCTAAAAAATCCAGTGGCTTCAAATGGAAGAAACACCAGCAAAAGGCATCCACTAGACCGGGTCTAATTAGCGGAAATTCCAATACTCTTGGCATGCCAATTGAGGACTTGGCAGCTACTAGGATTCAAACTGCATTCAGGGCTTATAGAGTATGTTGGTTTGGAGGTTCTACA…	GbaIQD12	MGSGNLFKSIINIVKDDNSKKVKGSSASKKSSGFKWKKHQQKASTRPGLISGNSNTLGMPIEDLAATRIQTAFRAYRARKQLRRLKGIVRLQAQTLNSSIKKQATTTLNYLHSWSNIQAQIRARRLCMVTEGHLRQKKIANQIKLEAKLHDIEVEWSCGPETMEEILTKIHNREEAAVKRERTMAYAFSHQWRAPNSNNNGIGNYELAKANWGWSWVERWIAVRPWESRLPAQSITPKKLQNKQINKAGKNSSSPKPKPKPHFSNEKETMKMKPRRLTYPGAEKPAARQQSTKAEEENNKKEERVV	GbaIQD12	ATGGGTTCTGGAAACTTGTTCAAGTCAATAATAAATATAGTGAAAGATGACAACTCAAAGAAAGTAAAGGGATCTTCTGCTTCTAAAAAATCCAGTGGCTTCAAATGGAAGAAACACCAGCAAAAGGCATCCACTAGACCGGGTCTAATTAGCGGAAATTCCAATACTCTTGGCATGCCAATTGAGGACTTGGCAGCTACTAGGATTCAAACTGCATTCAGGGCTTATAGAGCTCGAAAACAATTACGTCGATTGAAAGGTATTGTAAGATTGCAGGCTCAAACCCTAAATAGTTCCATCAAAAAGCAAGCTACAACAACATTAAATTATCTTCACTCGTGGAGCAACATACAGGCTCAAATAAGAGCCCGTCGACTCTGTATGGTAACAGAAGGCCAT…
GB_A05G1904	GB_A05G1904.1	GbaIQD13	ATGGGAAAATCCACTTCCTGTTTCAAAATCATCACTTGCGGCGGCGATTTTGCTGAGAACAACGACGTTATTCATGTTCCTGAGCCTGAGGTATATAAATAAATATCCTTTTCGCCTTTACGGCTGCCATTTTTTTTTTGTGTTTTGCGTTGGATTAGGATTTCACCTTCCGACTTTGCATTTGAGGTTTCAGTTCGAAACAGTCAATGCATTGTTTAATTTATGGATTTACTTGAGGAATCGGAGTTTAAACTTGCCTTACTCCACTACTTTAAGATCTGACTACTCTTGGCTTCGCATATTTATCAGCAATGTCCAGGCTGCCTTTTAAATCCGATTACTTTCACAACTTATATAATGCAAATGTTTTTTAGTTTCTGGTTTCAAATATAGCAAGTT…	GbaIQD13	MGKSTSCFKIITCGGDFAENNDVIHVPEPEIKKSNDKKGWSFRKRSERHRVLSNTVIQEATSGLKESPESAGFNFQQPDASIIPEETSTIEYSEEKPQALTPKEHIEEESKCVASKGYPEKKSQLLIPEGSKVPEPVASTTNEAEDDANLDESVVVIIQTAIRGFLAHKELGKLKNLVKLQAAVRGHLVRRHALGTLQCLQAIVKMQVLVRARLSQEGSYDEKKRDGKHCGENQSLERSAIKQNATYTSIENLLSNRFARKLMDSTQKTKPIRIKCDPSKPNSAWSWLERWMSVSLSKRPSTTELSIEQPEREKSDNCDFQVTTTVPESFPESNEPKLYVRETLVSSESEENLIAHDAANSKFEACQTTSSTVMDDLEQPQIDNSTSDIKEGEENLIIY…	GbaIQD13	ATGGGAAAATCCACTTCCTGTTTCAAAATCATCACTTGCGGCGGCGATTTTGCTGAGAACAACGACGTTATTCATGTTCCTGAGCCTGAGATTAAGAAATCAAATGACAAAAAGGGATGGAGTTTTAGAAAGAGATCTGAACGGCATCGGGTGCTTAGCAACACTGTTATACAAGAAGCTACTTCTGGACTTAAGGAAAGCCCGGAATCTGCCGGTTTTAATTTTCAACAGCCTGATGCATCCATTATTCCTGAAGAAACCTCCACCATTGAATACAGTGAAGAGAAACCTCAGGCGCTGACACCAAAGGAGCACATTGAAGAAGAATCTAAGTGTGTGGCATCAAAAGGATACCCTGAAAAAAAATCTCAGTTGTTGATTCCAGAGGGCTCAAAAGTT…
GB_A05G3064	GB_A05G3064.1	GbaIQD14	ATGGGCAAAAAGAGAGATTGGTTTTGGTTTGTGAAGAAAGCTTTGACCCCTGAGTCCAAGAAAGATCAGGTAAAAGGTTTGCACAATTTAAGATTTTTTTATAATTAAAAAATTATTTATAAGATGAATTGTTTTGAACAAATTAATATTTTATTTTAAAAAGGGCGAGGCTAAAATGTCAAGGCAACATCCTTTTTCACCCAACTTTTACTCTCTCTCTTTTTTTAAATTTTTAAATTTTTTATATAGTTTAGTTTTATAATTTTATAGTGTCATAGACGTGGTATAATTTTGAATTTCATACCTCTATTTTATGAAAACTAGAAGTTAATTCATTTATTTTAATTTATCATATTTTGATCTTTGCATGTTTGGGATTTAGAAAATTAATCAAATTAT…	GbaIQD14	MGKKRDWFWFVKKALTPESKKDQKESSKSKKKWQSKTKDSGPAVPLPQETETETKTEEPELPPPADAKPAEAENEPKKHTYFVALATAMAAAAAVAASKATAEAVHVASLQRILSERTAATKIQTAFRGYLARRALPELRRSERLKSMIEGQSVKEQAKTALRCMQTKGGLQSRIRGMRLRMLEENQILHHHLQQKRHKEHDKFNASMGGEWHDGRKSKEQSEAIKQYKQEAAMRRERALAYAFTRQRSWKVTSKAANQTLMDQNTPHWGWSWLERWMAARPWDIPCSSPNNASVNTLASSSISNNDNKPSPTPSKPTPPPPSKIPSFSSLSSQIRQPSPRGTRPGGDECSTPDRDRRRQSSIGGFSSAKDDKSVGSSAEKAPSWMKQVRTSQLSSSLR…	GbaIQD14	ATGGGCAAAAAGAGAGATTGGTTTTGGTTTGTGAAGAAAGCTTTGACCCCTGAGTCCAAGAAAGATCAGAAGGAAAGTTCAAAATCAAAGAAAAAATGGCAAAGCAAAACCAAGGATTCGGGGCCTGCAGTTCCTTTGCCTCAAGAAACTGAAACGGAAACAAAAACTGAAGAGCCTGAACTTCCTCCCCCTGCAGATGCCAAACCAGCGGAAGCTGAAAATGAGCCTAAAAAACACACCTACTTCGTCGCTCTTGCCACCGCTATGGCTGCTGCCGCCGCGGTCGCAGCTTCTAAGGCGACTGCTGAGGCTGTTCATGTCGCTTCTTTACAACGCATATTGTCGGAGAGAACGGCTGCTACCAAGATTCAAACTGCATTTCGCGGATACTTGGCTCGG…
GB_A05G3686	GB_A05G3686.1	GbaIQD15	ATGGGAAAAAAAGGTGGCTGGCTTTCTATTGTGAAGAAAGCTTTGAGCCCTGAATCCAAGAAATCTCAGGTTTCAATGATTTAATTCATAATTTAATGGATTTCTTTTTTCGGTTTGGGTTTTCTTAGATTTGTTGTTTTTAATTAATTTCAGCACCAAACTCCAAAGCCAAAGAAAAAATGGTTCGGAAAAAGCAAAGATTTGAGCCCTGTGTCTGTGCCTGAAGAAACTGAAGTGATAACTGAAGATGCAAAGCTAAAAGAAGCTGAAAACGAACAAAGCAAACATGCCTACTCTGTGGCTCTTGCCACCGCTGTGGCGGCCGAGGCAGCGGTGGCAGCTGCTCAGGCGGCTGCTGAAGTTGTCCGTCTCACTTCTCAGCCGCGCCATCTGGGGAAG…	GbaIQD15	MGKKGGWLSIVKKALSPESKKSQHQTPKPKKKWFGKSKDLSPVSVPEETEVITEDAKLKEAENEQSKHAYSVALATAVAAEAAVAAAQAAAEVVRLTSQPRHLGKSKEEIAAIRIQTAFRGYLARRALRALRGLVRLKSLIRGQSVKRQATTTLRCMQTLARLQSEISARRIRMSEENQALQRQLQQKCQKELEKLRAPMREDWNDSTQLKEQIEARQQNKQGATMKRERALAYAYCHQRSWKNCSRSVNQTFMDPSNSHWGWSWLERWMAARPWEVQSTTDNNDRGSVKSMGACSISISEISRAYSRRDLNNDNKPSPTPQKSSRVPSRQSPSTPPSKAPSISSVSYKTRLPSPRGSQWGGYEDSRSILSTRSDRYRRHSIAGSSMRDDESLTSSPAV…	GbaIQD15	ATGGGAAAAAAAGGTGGCTGGCTTTCTATTGTGAAGAAAGCTTTGAGCCCTGAATCCAAGAAATCTCAGCACCAAACTCCAAAGCCAAAGAAAAAATGGTTCGGAAAAAGCAAAGATTTGAGCCCTGTGTCTGTGCCTGAAGAAACTGAAGTGATAACTGAAGATGCAAAGCTAAAAGAAGCTGAAAACGAACAAAGCAAACATGCCTACTCTGTGGCTCTTGCCACCGCTGTGGCGGCCGAGGCAGCGGTGGCAGCTGCTCAGGCGGCTGCTGAAGTTGTCCGTCTCACTTCTCAGCCGCGCCATCTGGGGAAGTCAAAGGAGGAAATAGCTGCTATCAGGATTCAAACAGCATTTCGTGGATATTTGGCTAGGAGGGCACTGCGAGCTTTGAGAGGG…
GB_A05G4371	GB_A05G4371.1	GbaIQD16	ATGGGTGCCTCAGGAAAATGGTTTAAATCGCTCATAACTTTCAAACCACTTCAAGATCCTACTAATCAAGTAACTTCACACTAGGTTTACCTCTTTTTTCTTTCTTCTTTTTATTTATGCTTTCATGGTTTCATTTTTCTGTTAATTGGGTTTGTAGGAGAAGGTGGGAGATAAGACGAAGAAGAAGTGGAGGCTATGGAGGAGCTCATCCGAAGGGTTGGGATCCACCTCATCAAAGGTTCCCAGGATGCGCCACGTGGCTGCTTCAGAGGCCTCTGATTCATCTTTGTTGGTGGATGATGTGCTGGCTTCAGCTATGGCTACTGTTGCTCGTGCTCCACCCAAAGATTTCAGAGCTGTCAAGCGGGAATGGGCCGCTATTCGAATCCAGACCGCATT…	GbaIQD16	MGASGKWFKSLITFKPLQDPTNQEKVGDKTKKKWRLWRSSSEGLGSTSSKVPRMRHVAASEASDSSLLVDDVLASAMATVARAPPKDFRAVKREWAAIRIQTAFRALLARRALRALKAVVRIQAIFRGRQVRKQAAVTLRCMQALVRVQARVRAQCVTSSEGQAIPKLMDEDPAKQAERGWCDSLGTLEELKAKQQMRQQGAIKRERAIAYSVLKQQSRSCASPNARANKQPYSHNHQRLDRNSPDWNWLDRWMATKPWETRAMEEGTEPAEKVMMMNTISRKSEDNNFSFHSSSYEHEPLKVKRNNVTTRILARPPTSMQTSGSLSAPSSESVYDETSTSTSSASPTTLSSNTPVAGTLEDNHAQKPSYMNPTESIKAKQKNTFRFSPDNVRRRHVVD…	GbaIQD16	ATGGGTGCCTCAGGAAAATGGTTTAAATCGCTCATAACTTTCAAACCACTTCAAGATCCTACTAATCAAGAGAAGGTGGGAGATAAGACGAAGAAGAAGTGGAGGCTATGGAGGAGCTCATCCGAAGGGTTGGGATCCACCTCATCAAAGGTTCCCAGGATGCGCCACGTGGCTGCTTCAGAGGCCTCTGATTCATCTTTGTTGGTGGATGATGTGCTGGCTTCAGCTATGGCTACTGTTGCTCGTGCTCCACCCAAAGATTTCAGAGCTGTCAAGCGGGAATGGGCCGCTATTCGAATCCAGACCGCATTTCGAGCCTTGCTGGCAAGACGAGCTTTAAGGGCCTTGAAAGCAGTAGTGAGGATTCAAGCTATATTCCGGGGTCGTCAAGTCCGAAAG…
GB_A06G0053	GB_A06G0053.1	GbaIQD17	ATGGGAAGATCCATTTCCTGTTTCAAAATCATCACTTGCGGCACTGATTCAGCTGATAAAAACGAAGACTTTATCGATGTTCCTCAGGTATATGTTTTATCCNNNNNNNNNNNNNNNNNNNNNNNNNNNNNNNNNNNNNNNNNNNNNNNNNNNNNNNNNNNNNNNNNNNNNNNNNNNNNNNNNNNNNNNNNNNNNNNNNNGTTTTTTTTTTTTTTTGTAATTGATGTTTTTAGTTTCTTCAAATGAAGTTTTTAGAGGAATCGAAGCTTTAGAACTTGACATCTTACACTATTTTGAGATCCAATTGCTTCCACAGTTTATGAATTGAAAATGTTTATTTTTCAGCTGCAGTTTCCAAATCTAGCAAGTTTTTTAAGGTCAAATTGTATAGAATGTCTC…	GbaIQD17	MGRSISCFKIITCGTDSADKNEDFIDVPQDKRSSDKKGWSFRKRSERHRVLSNTVVQEASTGLEESPEAASYVQQSDVSVAPEKTSTVQYTEEKLQPVAPKDYVEKKSQLSTQEDSKVPEPVVAATNEAKDDANMDESDVVVVQTAIRGFLARKELGKLKNLVKLQAALRGHLVRRHAVGTLRCIQAIVKMQMLVRAHHARLSQEGSYSEKNAASTSIEKLLSNRFARQLLDSTPKTKPIHINCDPSKPSSGWSWLERWMSTSSSEKTSTAELPNEQLDATVPSEAISESKDVNKTMVSSESEENLITYVAADSKSEACLPTSSVTGDFERTWIDNMSTSDLKETSLDQTIETEAHCLDVGVESLDAVSSGADTISRSKEPNIAENPVLRDRKGQHYGS…	GbaIQD17	ATGGGAAGATCCATTTCCTGTTTCAAAATCATCACTTGCGGCACTGATTCAGCTGATAAAAACGAAGACTTTATCGATGTTCCTCAGGACAAGAGATCGAGTGACAAAAAAGGATGGAGTTTCCGTAAGAGATCTGAACGGCATCGGGTGCTTAGCAACACTGTGGTACAAGAAGCTTCTACTGGACTGGAGGAAAGTCCTGAAGCTGCTAGTTATGTTCAACAGTCCGATGTCTCCGTTGCTCCTGAGAAAACCTCCACTGTTCAGTACACCGAAGAGAAACTTCAGCCAGTAGCACCAAAAGATTACGTTGAAAAAAAATCTCAATTATCGACCCAAGAGGACTCGAAAGTGCCCGAACCTGTTGTTGCTGCCACAAATGAGGCTAAAGATGATGCT…
GB_A06G1871	GB_A06G1871.1	GbaIQD18	ATGGCTAAGAAAAAGAGCTGGTTCAGTCTAGTGAAGAAGTTTTTTCTCTTTGAGACAATTGCAAGAACAGAGAAGGTAACGTTTTTTTTTTTGCTATTTACTGCTGTTTCCCAGGTTTTTTTTTTCTTTTTCTTTATCCTTTATGAATGGATGTTATCTATTTGTCAGAAGGAGAAAAAAAGGAAATGGATGTTTGGAAGGTTAAGGACCAAGAGGTTGACAGCACCACCAAAGGACGTGACAAAGGATGAGCATGTAACTGTGGCTATTACCACACCTGCTGCCCCCGAAGCAGGTGTTGCAGCCGCTCAGGTTGCGGCCGAGGTTGTTCCACCCTATGGTACCCTTCATTCTAACCATATATGTGATGGAAAAACAGATGAACGAGCCCTGGATGTT…	GbaIQD18	MAKKKSWFSLVKKFFLFETIARTEKKEKKRKWMFGRLRTKRLTAPPKDVTKDEHVTVAITTPAAPEAGVAAAQVAAEVVPPYGTLHSNHICDGKTDERALDVQELAATKIQATFRGYLARKALRALKGIVRLQAIIRGSAVRRQAMNTLKCLQSIVNIQSQVSAMRFQMAEGTWQYDETKQLVTLEDKIIKVDINSQRRWDDSILTKEEAEAMVLSRKEAAIKRERIKEYSYVHRKSAESELNKGNGRLKYWLDEWVDTQVTKSKELEDLDSVWTSNRKPMEESRAKHLRLKTSPRPYHYNSEGLESPVVPVPRRSFHKKQCSLGEDNSFPTSPVVPPYMAATQSARAKVRSLSSPKVRPGSFETQSESYSPYKNKLCLISSITSEVPSSYKMSGSRSS…	GbaIQD18	ATGGCTAAGAAAAAGAGCTGGTTCAGTCTAGTGAAGAAGTTTTTTCTCTTTGAGACAATTGCAAGAACAGAGAAGAAGGAGAAAAAAAGGAAATGGATGTTTGGAAGGTTAAGGACCAAGAGGTTGACAGCACCACCAAAGGACGTGACAAAGGATGAGCATGTAACTGTGGCTATTACCACACCTGCTGCCCCCGAAGCAGGTGTTGCAGCCGCTCAGGTTGCGGCCGAGGTTGTTCCACCCTATGGTACCCTTCATTCTAACCATATATGTGATGGAAAAACAGATGAACGAGCCCTGGATGTTCAAGAACTTGCTGCCACAAAAATCCAAGCTACCTTTCGGGGCTACCTGGCAAGGAAAGCTTTGCGGGCGCTGAAGGGGATAGTGAGGCTTCAA…
GB_A06G1978	GB_A06G1978.1	GbaIQD19	ATGGGCAAAAAAGGAAGCTGGTTTACTGCTGTGAAGAAAGTTTTAAGCCTTGAACCCAACAAAGATGAGGTTTCATTTTCAATTATTTTATTTCATAATCTAATTGTTTTTTATTTAATTTTTTGTAATTTTTTTTATTTCACCAGAAGATTCAAAAATCCAAGAAAAATGGGGTTAAATTACCTGAAAAGATCAAAGGAAGTAAACGTGCCAACTGGTTCGCTCCGGCCACCACCATGGTGACCGGCGCGTTGGTTCGCCTTACTTTGTCGCCACACTACTTGGGAAAATCAATGGAGGAAATAGCTACTGTTAAGATTCAAACTGTTTTTCGAGGATACTTGGTATCAAATTTCTTTCACTTATTATTATTATTTTTTTATAATTTTAAACTTCTTA…	GbaIQD19	MGKKGSWFTAVKKVLSLEPNKDEKIQKSKKNGVKLPEKIKGSKRANWFAPATTMVTGALVRLTLSPHYLGKSMEEIATVKIQTVFRGYLARKALRDLRGLERLKSLIQGQSVKRQATITLRCMRTLARVQSQTRTRQLRMSEQNRALQKHLQTKYEKQLQNSKSYMGEDWNVSTKSKEQMQAKQQYRQVAAMRRERALAYSFTHQRSWKTTCRSMNHTFMDPFNPKWSWSWLERWMSTRPWEIQNAPDNNDHGPSKSVGAEITKAKSQSDVNNDHNKRSSTLAKPIRPPNRRSSSTPPSKTHSISSKKGLQSPSPTRIQLPDRYKRHSIGGLSLERDDEVFANSPPSNKIPARSSSKDRSRPPSINRNPVNTRRHSGPPKVDIFPN	GbaIQD19	ATGGGCAAAAAAGGAAGCTGGTTTACTGCTGTGAAGAAAGTTTTAAGCCTTGAACCCAACAAAGATGAGAAGATTCAAAAATCCAAGAAAAATGGGGTTAAATTACCTGAAAAGATCAAAGGAAGTAAACGTGCCAACTGGTTCGCTCCGGCCACCACCATGGTGACCGGCGCGTTGGTTCGCCTTACTTTGTCGCCACACTACTTGGGAAAATCAATGGAGGAAATAGCTACTGTTAAGATTCAAACTGTTTTTCGAGGATACTTGGCGAGGAAGGCATTGCGAGATTTGAGAGGGTTAGAGAGGTTGAAATCGTTGATACAAGGGCAATCCGTGAAACGACAAGCCACTATTACGTTACGATGCATGCGGACACTTGCTCGAGTGCAGTCCCAAACT…
GB_A07G0084	GB_A07G0084.1	GbaIQD20	ATGGGAAAAGCTACAAGGTGGCTAAAGAGCTTATTTGGGATAAAGAACAACAAAGAATGCCCAAGTTCCGGTGACCGGAAAGATAAGAAACGGTGTAGCATTGGCCATTCAGGGCGGGAATCAAGTGGCGGATTATGTCACAACCCTACAACGATACCACCAAATATATCACCGGCAGAGGTGGTGTGGCTGAGATCATTCTACAATGAAACGGAGAAAGAGCAGAATAAGCACGCAATTGCGGTGGCAGCTGCCACGGCTGCTGCTGCAGATGCCGCTGTCGCCGCCGCTCAGGCAGCTGTGGCGGTGGTGAGGCTTACGAGTCATGGAAGAGGTACCATGGTCGGCGGTGGTGGACACGAAAAGTGGGCTGCCATTAAGATTCAATCCGTTTTCAGA…	GbaIQD20	MGKATRWLKSLFGIKNNKECPSSGDRKDKKRCSIGHSGRESSGGLCHNPTTIPPNISPAEVVWLRSFYNETEKEQNKHAIAVAAATAAAADAAVAAAQAAVAVVRLTSHGRGTMVGGGGHEKWAAIKIQSVFRGYLAKKALRALKGLVKIQALVRGYLVRKQASATLHGMQALIRAQATIRSQKARKSMEQFDDTRSERTVSFHSRRLSASLDTLNIEESPKIVEIDTGRPKSRSRRTNTSVSDFGDDPSFQILSSSVPARVPARLSVPDSHTDWGLTGDECRFSTAQSTPRFINCCVSNAPVTPAKSVCADNFFRHYGIGNLNFPNYMANTQSFKAKLRSHSAPKQRPEPGPKKRLSLVETTESRSSLSGARMQRSCSQAQEAISFKNVVMGKLDRS	GbaIQD20	ATGGGAAAAGCTACAAGGTGGCTAAAGAGCTTATTTGGGATAAAGAACAACAAAGAATGCCCAAGTTCCGGTGACCGGAAAGATAAGAAACGGTGTAGCATTGGCCATTCAGGGCGGGAATCAAGTGGCGGATTATGTCACAACCCTACAACGATACCACCAAATATATCACCGGCAGAGGTGGTGTGGCTGAGATCATTCTACAATGAAACGGAGAAAGAGCAGAATAAGCACGCAATTGCGGTGGCAGCTGCCACGGCTGCTGCTGCAGATGCCGCTGTCGCCGCCGCTCAGGCAGCTGTGGCGGTGGTGAGGCTTACGAGTCATGGAAGAGGTACCATGGTCGGCGGTGGTGGACACGAAAAGTGGGCTGCCATTAAGATTCAATCCGTTTTCAGA…
GB_A07G0699	GB_A07G0699.1	GbaIQD21	ATGGGAAAATCTCCCGGAAAATGGATTAAGACTGTGCGTTTTGGAAAGAAACCTTCCAAATCTAGTTATCCTAAAGGAAGGGAGGTAATATTTTACTGCTAATTACTACTAAACAGCAAATATCATGTTATTTATATTTGAAAGCAGTGGTAAATTCTTGTTTGCAATGCTGTTAATTAGAGTTTCCTATAAGCTAGATGGGGGACAGATCCATAGTCGGGGCTGTTGCCACCATTGAAATCCTAAAGGCCCTAGGAGAGTTGGAGTATATTTAATAAATAGCTAGATTTTACGTATACCCCACTGAAATTGAAAAGAAAAATGATATGCATATTACATGTTTATAAATGTTTATTGATTTGCTTTGCAAAATAATAAGGTGTTATTAGAAATCCTATC…	GbaIQD21	MGKSPGKWIKTVRFGKKPSKSSYPKGREKVDNDSQVLVAARASESDLAVAPPFSSQLNPHTTERDERRLELENKETANISHDDETSLPMSQDIDSLKFTLQDSPSNPERIKHEQSATLVQAAFRGYLARRAFWALKGIIRLQALIRGHLVRRQAISTLCCMMGIVKLQARVRGQMVRHSDCVHELQKKCNQINLLESKLVVSLGFNMPSHIGKLSGHAFVRKLIASSPTVMPLRLRYDVGEPNSVWIWLERWSASCFWKPVPQPKKISNTKFQKKKVNGQTVEMDTGRAKRSVRRIPSSNMDSTSVQATSEFDKPKCNPRKIFGHPAGPVQENPQNELEKVKRNLRKVHNPVVEHSLQSEFEFEKLKSLEKVSSTPDLDIVEESLKRSAEKTSKEAAMT…	GbaIQD21	ATGGGAAAATCTCCCGGAAAATGGATTAAGACTGTGCGTTTTGGAAAGAAACCTTCCAAATCTAGTTATCCTAAAGGAAGGGAGAAGGTTGACAATGACAGCCAGGTATTGGTTGCAGCCAGGGCATCAGAAAGTGATTTGGCTGTGGCTCCTCCCTTCTCTTCACAGCTCAATCCTCATACTACTGAGAGAGATGAAAGGAGATTAGAATTGGAGAACAAGGAAACTGCAAATATCTCACATGATGATGAGACATCACTGCCAATGAGTCAAGACATAGATTCTCTGAAGTTCACTCTTCAGGATTCACCTTCTAATCCTGAAAGGATAAAGCACGAACAATCGGCGACCCTGGTGCAGGCTGCTTTTAGGGGTTACCTGGCTCGCCGAGCGTTCTGG…
GB_A08G2158	GB_A08G2158.1	GbaIQD22	ATGGACAAAGCCTCCAAGTGGTTCCGCAGTATCCTCGGTCTCAAAAGAAGAGACTCCCACAAACAACCACCTTCTTCCAAACGTCGTTGGAGTTTCGTTAAATCCTACCGCGAGAAGGACTCCTCCGCCGTCTCCACTGCAACGTCGTCCCTACGCGGTCTTCAGCAACCACTCGAAGATTCTGTTTCTGTTGTTGACGCGAATAGTGGGTATGATGCGGTGGATGATAATAACGACCACGCCATTGCTGTGGCTGCCGCTACTGCCGCCGTTGCCGAAGCAGCCGTTGCGGCTGCTCAAGCTGCCGCTGTGGTGGTTAGGCTCACCGGAAGCAGTGGTAGGTGCGCGCGTGATCCGGTGGCTCACGTTAGCAACAGCTACTGGGCAGGCGAGGAATTA…	GbaIQD22	MDKASKWFRSILGLKRRDSHKQPPSSKRRWSFVKSYREKDSSAVSTATSSLRGLQQPLEDSVSVVDANSGYDAVDDNNDHAIAVAAATAAVAEAAVAAAQAAAVVVRLTGSSGRCARDPVAHVSNSYWAGEELAAVKIQSTFRGYLARRALRALKGLVKLQALVRGHIERKKTAEWLRRMQVFLQTQARARAGRAQISESSRISSKSSHYLHPGPPTPENFEHAVQPKSTKYEQSSMLKRNGSRLSGRTRDNYEQMHPGWYTSDHWIDDQSWDQRGHSTRIGHTDDEKRMTKFLRLILGNPVSPPNAETCFTLHTLH	GbaIQD22	ATGGACAAAGCCTCCAAGTGGTTCCGCAGTATCCTCGGTCTCAAAAGAAGAGACTCCCACAAACAACCACCTTCTTCCAAACGTCGTTGGAGTTTCGTTAAATCCTACCGCGAGAAGGACTCCTCCGCCGTCTCCACTGCAACGTCGTCCCTACGCGGTCTTCAGCAACCACTCGAAGATTCTGTTTCTGTTGTTGACGCGAATAGTGGGTATGATGCGGTGGATGATAATAACGACCACGCCATTGCTGTGGCTGCCGCTACTGCCGCCGTTGCCGAAGCAGCCGTTGCGGCTGCTCAAGCTGCCGCTGTGGTGGTTAGGCTCACCGGAAGCAGTGGTAGGTGCGCGCGTGATCCGGTGGCTCACGTTAGCAACAGCTACTGGGCAGGCGAGGAATTA…
GB_A08G2877	GB_A08G2877.1	GbaIQD23	ATGGGAAAAGCTACAAGGTGGTTGAAGAGCTTATTTGGGATAAAGAACAGCAAAGACTACTTGAATTCCGGTGACCGGAAAGGAAAAAAAGGGTCTAGCATTGGCCGTTCGGGGAGGGATCCCAGCGGCGGATTGTGTCACAGCGTTACAGCGACACCACCACCAAACATGTCACCGGCAGAAGTGTCTATGTCGATAAGGTCATACTACAATGAAACGGAGAAGGAACAAAACAAACACGCAATCGCCGTAGCGGCCGCCACGGCAGCGGCTGCCGATGCTGCGGTGGCCGCGGCGAAAGCAGCTGTGGCGGTCGTGAGGCTGACAAGTCACGGAAGGGGAACCATGTTCGGGCACGAGAGATGGGCTGCTGTTAAAATTCAAACCGCGTTTCGAGGT…	GbaIQD23	MGKATRWLKSLFGIKNSKDYLNSGDRKGKKGSSIGRSGRDPSGGLCHSVTATPPPNMSPAEVSMSIRSYYNETEKEQNKHAIAVAAATAAAADAAVAAAKAAVAVVRLTSHGRGTMFGHERWAAVKIQTAFRGYLARRALRALKGLVKIQALVRGHLVRKQATIRSHKANRFDIRARKSMERLYSFNHTTNGIDENSKIVEVVDIVRPKSRSRRNVNASESDFGDDYQPVHRTLSSPFLSRVPARISIPDGGRDWGLTGDEYRFCTAQNTPRVISSCGSNSNASVAPPPKSVCSDNWFRHYGNYPNYMANTQSFKAKLRSQSAPKQRPEIGPRKRLSLDEMMESRCSLSGVRMQRWCSQV	GbaIQD23	ATGGGAAAAGCTACAAGGTGGTTGAAGAGCTTATTTGGGATAAAGAACAGCAAAGACTACTTGAATTCCGGTGACCGGAAAGGAAAAAAAGGGTCTAGCATTGGCCGTTCGGGGAGGGATCCCAGCGGCGGATTGTGTCACAGCGTTACAGCGACACCACCACCAAACATGTCACCGGCAGAAGTGTCTATGTCGATAAGGTCATACTACAATGAAACGGAGAAGGAACAAAACAAACACGCAATCGCCGTAGCGGCCGCCACGGCAGCGGCTGCCGATGCTGCGGTGGCCGCGGCGAAAGCAGCTGTGGCGGTCGTGAGGCTGACAAGTCACGGAAGGGGAACCATGTTCGGGCACGAGAGATGGGCTGCTGTTAAAATTCAAACCGCGTTTCGAGGT…
GB_A08G2928	GB_A08G2928.1	GbaIQD24	ATGGGTGCTTCAGGGAAATGGGTAATATCTCTTATTGGTCTCAAAAAAACCCAAAAACAACACCAAGTAAGCTCTGGGTTTTCTATGTTATTCCACCGTAAAAATATTTATATACATTTTAAAGATTTAAAGCTCTTTCCTTTTTGTGTGTTTATGTAGGAGAAAGTGAATAGCAACAAGAAATGGAAGCTATGGAGAAAGTTTAGATCAGATTCTCAAAGCTCTGATTCTTTCATTGCTGCCATGGCCGCCATTGTTCGAGCTCCTTATAAAGATTTCAGTTTTTTAAAGCAAGAATGGGCTGCCATTCGCATTCAAACAGCTTTTCGTGGCTTCTTGGTAAAGTTGAAGTCTTTTTTTTTTTTTTTCCTTTACATGTTTGGTATCCGGCAAAGTGAT…	GbaIQD24	MGASGKWVISLIGLKKTQKQHQEKVNSNKKWKLWRKFRSDSQSSDSFIAAMAAIVRAPYKDFSFLKQEWAAIRIQTAFRGFLARRALRALKGIVRLQALVRGRQVRKQASVTLRCMQALVRVQARVRARRVRMSIEGQAVRKMLDGHRSKDDVLKQAEDGWCGSKGTLEDVKTKLHMREKGAFKRERTLAYSLAQKQWKSVPGSTTRTNGLIPCLISQEFDKNSWGWNWLERWMVARPLETRLMEQSTRTDPSKTCLESLSGKNERCSEPCSMKARKNNVTTRVSAKPPPHTRQVTRSSSSPSSEFRFDESSGSSSICTSTTPVSGTTVLPSDATGDSGNSRPNYMTMTVSTKAKQRSGNHGFQRQSMDELEFKRSAGFDNGDSKSCAGSDPSVRMSRP…	GbaIQD24	ATGGGTGCTTCAGGGAAATGGGTAATATCTCTTATTGGTCTCAAAAAAACCCAAAAACAACACCAAGAGAAAGTGAATAGCAACAAGAAATGGAAGCTATGGAGAAAGTTTAGATCAGATTCTCAAAGCTCTGATTCTTTCATTGCTGCCATGGCCGCCATTGTTCGAGCTCCTTATAAAGATTTCAGTTTTTTAAAGCAAGAATGGGCTGCCATTCGCATTCAAACAGCTTTTCGTGGCTTCTTGGCAAGGAGAGCATTGAGGGCTTTAAAAGGAATTGTGAGGCTACAAGCTTTGGTTCGAGGTAGACAAGTTCGGAAACAAGCCTCGGTGACGCTTCGATGCATGCAAGCTCTCGTTCGTGTTCAAGCTCGAGTCAGGGCTCGTCGTGTTCGAATG…
GB_A09G1299	GB_A09G1299.1	GbaIQD25	ATGGGTGTCTCAGGAAAATGGATCAAGGCATTGGTTGGCTTGAAAAGAACAGACAAGTCACAATCCTCGGAGAAGAAAGAAAATGTCAGTATGACTAACTATATATATTCTAAACAGTTTCTCCTATTTTGGAGGTTTAGATTGGGTATGTTATTGTGTAATATCATGTGTGCCTCTTCAAAATGAAGTGATGTCTTATTGTCTCAAGTTATCTGGTACAATGGAAAGGGGTGTTTTATGGGAACTTACATGCAGCAATTCTCCTTGTTAGTCAAAAGAAATATATGATTTTGTTCTCTTCAGCCATCCTAGTCAATGATGCTTTATGTCATTATCAGAATAATTGCACCTTTTTTTATGCTTCTTTCTATTCATCTAGTCTTATTGTGGCTTGTAGAA…	GbaIQD25	MGVSGKWIKALVGLKRTDKSQSSEKKENRAATSKFRHRRKHSIEFYTDKLLEELDQNAASPARDANTHAIADAAGFPSGSLEVRDVALNELVMEEWAATRIQTAFRGFLARRALRALKGLVRLQALVRGHAVRKQAAMTLRCMQALVRVQARVRARRVRLTLESETAQQKLQQQLADEARVKEIEEGWCDSIGSVEEIQAKLLKRQEAAAKRERAMAYALAHQWQAGSRQQSVPAGFEPDKSSWGWNWLERWMAVRPWENRFLDINLRDGAVACEDGSAEGKNGANSQIKPATKKPAASNLHANLSNLKVGPSYSEGSDSPPGKSANVVDAVNALSSKPKSKPIIEDLGEEAGSKPVFTSRSRSNPKERSIKSDKLVKKRLSLPNSGEGTGSQTSKPGK…	GbaIQD25	ATGGGTGTCTCAGGAAAATGGATCAAGGCATTGGTTGGCTTGAAAAGAACAGACAAGTCACAATCCTCGGAGAAGAAAGAAAATAGGGCAGCTACTAGCAAATTTCGTCACCGAAGGAAGCATTCCATTGAGTTTTACACAGATAAACTTCTAGAAGAGTTGGATCAGAATGCTGCTTCACCAGCCAGAGATGCTAATACTCATGCAATTGCAGATGCTGCTGGCTTCCCCTCTGGTTCACTTGAAGTGCGTGATGTAGCTCTTAATGAACTTGTAATGGAAGAATGGGCTGCCACAAGGATACAAACAGCTTTCCGTGGGTTTCTGGCTAGAAGAGCACTCCGAGCCTTAAAAGGATTGGTCAGACTGCAGGCCCTGGTGAGGGGTCATGCTGTAAGA…
GB_A09G1482	GB_A09G1482.1	GbaIQD26	ATGGGAAAGAAAAGGTGCTGGTTTAGTTGGGTGAAGAAGATATTCGCTTCTGATGCAAAACCAAAACCGGAAAAGGTTCATTTTTAACTCTTTTTTTTTGTTGAGAATAATAGCTTTTGGTTTATCAAAAGTTTGATTGTACTTTGCAGAAATCAAGGAGGTGGAAATGGATTTTTAGAAGACTGAAACTAAAGCAACACCACCTTGCACTTCCTGCACCTCAAAAATCATTGTGTGAAGCAAGGGAAGAGCAAAGAAATCATGCTTTAAACGTAGCCATTGCAACAGCTGCCGCAGCGGAGGCCGCAATTGCTGCCGCCCAAGCAGCGGCTGAGGTTGTGCGTCTCACAGCTGCCTCTAACCCTTCTCATCATTTCACTACAATCGACAGAAACTTGG…	GbaIQD26	MGKKRCWFSWVKKIFASDAKPKPEKKSRRWKWIFRRLKLKQHHLALPAPQKSLCEAREEQRNHALNVAIATAAAAEAAIAAAQAAAEVVRLTAASNPSHHFTTIDRNLAALKIQTAYRAHLARKALRALKGVVKLQAIVRGRAVRRQALINRKWLQSGTNMYPKVKEKSTSPTKVICQDSRRKQSLMNKDELQDKDIKGQYACNSEKSWNDSVLSKQDIEVNFLRSQEAMAKRERMKKYSYSHRERLNTRMLDELVHVKEAKAEANERERVMISKLDVPSNLSTWEVNGPPHVRHRKLKKQQDTLNGMNPLFSFPRRSFSRTQQSAAGDEGSIPNSPVFPSYMGATECAKAKARSRSTPRQRVGFWDSCFDNSGAYKGGLSLWSTYERAPFSIDESCCL…	GbaIQD26	ATGGGAAAGAAAAGGTGCTGGTTTAGTTGGGTGAAGAAGATATTCGCTTCTGATGCAAAACCAAAACCGGAAAAGAAATCAAGGAGGTGGAAATGGATTTTTAGAAGACTGAAACTAAAGCAACACCACCTTGCACTTCCTGCACCTCAAAAATCATTGTGTGAAGCAAGGGAAGAGCAAAGAAATCATGCTTTAAACGTAGCCATTGCAACAGCTGCCGCAGCGGAGGCCGCAATTGCTGCCGCCCAAGCAGCGGCTGAGGTTGTGCGTCTCACAGCTGCCTCTAACCCTTCTCATCATTTCACTACAATCGACAGAAACTTGGCTGCTCTTAAAATCCAAACTGCTTATCGGGCACACCTGGCAAGGAAAGCACTGAGGGCATTGAAGGGAGTAGTG…
GB_A09G1809	GB_A09G1809.1	GbaIQD27	ATGGGGAAGAAAGGAAAATGGTTGTCTTCTTTGAAGAAAGTGTTCAGCCCAGATTCCAAGGAAAAGAAAAACCAGGTTTGAAGAAAATCCCATTCACCTAATTTTGCCTTTGCAGTAGTTTATAGTCCTCAATGAGTTTTTAGTATTCTTGATTGCTATGTTTTTCAGAAATCAAAACAACAGTTGTTGGAGAAGCAGGTGCATTTGGGTTCCAATGATTCTGGTGCAGCCACTTTAGAAACTGTCAACTTGCCCCCTCCTCCGCCAGAAGAAGTTAAACCGATTGAAGCAGAAAGCAAGCAGACTTACCCTGTGGCAGTTGCCACTGCTGCTGCTTCACCTCAGGCTGCCGTAGAGGTTGTTCAACGTCAGCTTAATAGAGATGCTCTGTTCGCTGGA…	GbaIQD27	MGKKGKWLSSLKKVFSPDSKEKKNQKSKQQLLEKQVHLGSNDSGAATLETVNLPPPPPEEVKPIEAESKQTYPVAVATAAASPQAAVEVVQRQLNRDALFAGKSEEEVAAIKIQTAFRVYLARRALHALKGLVRLKSLMEGPVVKRQAVSTLRCMQTLSRLQCQVRIRRTRMTEENQALQRQLLQKHAKEIVNLQMGEDWDDSLQSKEQIEASLLSKHKAAMRRERAMAYSFTHQQTWKHASRSMNPLFMDPNNPSWGWSWLERWMAAPPREGRGTTEKEQNDQSSIRSARSNFGGEISKAYARYQLNLDKQSPKTGQKPNQTSSLLSVSTPKTSASIPARKLKSASPRSSVVGPDDDGRSMVSIQSERNRRHSIAGSSVHDSEGLGSSPSLPSYMVPT…	GbaIQD27	ATGGGGAAGAAAGGAAAATGGTTGTCTTCTTTGAAGAAAGTGTTCAGCCCAGATTCCAAGGAAAAGAAAAACCAGAAATCAAAACAACAGTTGTTGGAGAAGCAGGTGCATTTGGGTTCCAATGATTCTGGTGCAGCCACTTTAGAAACTGTCAACTTGCCCCCTCCTCCGCCAGAAGAAGTTAAACCGATTGAAGCAGAAAGCAAGCAGACTTACCCTGTGGCAGTTGCCACTGCTGCTGCTTCACCTCAGGCTGCCGTAGAGGTTGTTCAACGTCAGCTTAATAGAGATGCTCTGTTCGCTGGAAAATCTGAGGAGGAAGTGGCAGCAATAAAGATTCAAACAGCTTTCCGAGTTTACCTGGCTAGAAGGGCATTGCATGCTTTAAAAGGATTGGTC…
GB_A09G2064	GB_A09G2064.1	GbaIQD28	ATGGGTCTTTTCCGGCGACTCTTTGGAGCCAAAAAGTCCGACAAAACCCGATCCGGTAAAGAACGGAGGCGTTGGAGCTTTGCTAGATCTTCCAATCCCACGTCTTCAACTTCCCATATAGATCATGCTCTTACTACTGCTCCATGCGGTGACACCTTGGATGCCAGCAAGCACGCAATAGCAGTAGCAGCCGCCACTGCTGCTGTAGCTGAGGCTGCTCTCGCAGCTGCGCATGCGGCTGCTGAGGTTGTTAGACTGACAAGTGGTGGTGGTGGCCCCGCTGGGAACAACCGACGACTCGTACAGGAGGTAGCGGCTGTTAGGATACAGTCCGCTTTTCGAGGTTATCTGGTTAGTATTTTCTTCCTTTTACCTTCACATCATTTCTTCCTAGCCATT…	GbaIQD28	MGLFRRLFGAKKSDKTRSGKERRRWSFARSSNPTSSTSHIDHALTTAPCGDTLDASKHAIAVAAATAAVAEAALAAAHAAAEVVRLTSGGGGPAGNNRRLVQEVAAVRIQSAFRGYLARRALRALKALVKLQALVRGHFVRKQTADMLRRMQTLVKLQDRARSSRAHVTKSLDSVVKMSRLPRNAYLQVHATSGKDECQLRAYCTKSDGLSILKRCGSNSNFRNIIDLEKARMGSNWLDHWRGESLWNNRREAPLSRRLADDEKSDKILEVDTWKPHLSSQQSHRNVRPSQHFSALDYTQSFTAYDSPRKASGKASNAIPNISSAEVLTLSSMKYPGGKDEAVLRTADNSPQVHSASSRPGSSARRSPFTPTRSECSWGYLSGYSGYPNYMANTESSRA…	GbaIQD28	ATGGGTCTTTTCCGGCGACTCTTTGGAGCCAAAAAGTCCGACAAAACCCGATCCGGTAAAGAACGGAGGCGTTGGAGCTTTGCTAGATCTTCCAATCCCACGTCTTCAACTTCCCATATAGATCATGCTCTTACTACTGCTCCATGCGGTGACACCTTGGATGCCAGCAAGCACGCAATAGCAGTAGCAGCCGCCACTGCTGCTGTAGCTGAGGCTGCTCTCGCAGCTGCGCATGCGGCTGCTGAGGTTGTTAGACTGACAAGTGGTGGTGGTGGCCCCGCTGGGAACAACCGACGACTCGTACAGGAGGTAGCGGCTGTTAGGATACAGTCCGCTTTTCGAGGTTATCTGGCACGGAGGGCACTGAGAGCTTTGAAAGCATTGGTGAAGCTTCAAGCG…
GB_A09G2405	GB_A09G2405.1	GbaIQD29	ATGGGAAAGAAGGGAAGTTGGTTTTCTGCAATTAAAAAAATTTTCTTTCCACACTCCAAGGAAAAGCTAAATAATGTAAGTTGTTATTCTAACAATGATGCATATGAACTTCACCACTTCATCCGTGCTTTTGTTTCAACTCTACGAATTTATACAATCGTAGATGATATATGGTTGCTTAATTTCGTTCTTTCTCTTGTGTATGAGGTTTAAACATGCCTGTAGGTTGTGCTGGCATGAAAAACAGTTTTATGTTCTCAAACCAGTTTGTGATTACTGAATAGAAGAGCATAAGAACCCGGAATTTTGGAAAAAGGGTCTAAAACACAAGTGGATATAATTAGTTGCCTTTTGATGAACTATAGATGCATCTAATTGGAGTGTGAAATTTCTGATTGA…	GbaIQD29	MGKKGSWFSAIKKIFFPHSKEKLNNESDKRSDKEKKKGTGKLRHGETNSFLPLFRKPSSIEKILGEAEREQNLIFRPPTPPEQPRTPPFMPHRPASPRGPSPRVASPRVASPRAASPPRAASPRAASPPPPPPPPPRAASPRVASPRGASPKPAPSRIVRPRPEPTLKNQHASATQIQAAYRGYKARRSFRALKGLVRLQGVVRGQHVKRQTTNAMKYMQLLVRVQSQIQSRRIQKLENQERQQAQSKEAESTLGKWISQSEAGNENWDDSVLTKEEREARMQRKVEAVIKRERAMAYAYSNQLWKSTPGSGIRSGGFPWWWNWFDHPLPPVNAPGSQGTKSFQLTPPRPNSQLKPSSRPQSSGSRQRQFTYDNIMETPTPKSTRSTILHATRRMRTPP…	GbaIQD29	ATGGGAAAGAAGGGAAGTTGGTTTTCTGCAATTAAAAAAATTTTCTTTCCACACTCCAAGGAAAAGCTAAATAATGAATCGGATAAAAGAAGTGATAAAGAAAAGAAGAAAGGCACAGGAAAATTAAGGCATGGAGAAACCAATTCCTTCCTTCCCCTCTTTAGAAAGCCCAGCAGTATCGAGAAAATTCTTGGGGAAGCTGAACGAGAGCAAAATCTAATATTCAGGCCTCCCACACCTCCGGAGCAGCCAAGAACACCACCTTTTATGCCTCATAGACCTGCATCTCCACGGGGTCCATCTCCTAGGGTTGCCTCTCCTAGGGTTGCTTCTCCAAGAGCTGCTTCCCCTCCACGAGCTGCATCCCCTAGAGCTGCTTCTCCACCTCCACCTCCACCC…
GB_A09G2501	GB_A09G2501.1	GbaIQD30	ATGGGGAAGACAGCGAAATGGTTGAAAAGCTTGTTGACTGGTAAGAAAGACAAAAGTAGAAACATAAGTAATAATCAGAATTCTTCAGTTGTCCCTGAGAATCCAACGACGACCGTTTCGATCCCACTGCCACCGACAACTCCTAAAGAGAAACGACGATGGAGTTTCCGGAGATCTTCGGCTTCAGCGACGCCTGTTAGGGAGTTGAATTCTGTAGAACAAGTGGTTACCCCTTCACCTCCACCACCACCGGCTCCGCCGGTTGTGACCGATGTGATCCGGGTAAGTGGTAGTGCTGATGATGAGAAAGTTGATGCAGGTGAAGAGGCGGCTGCTAAGATGATTCAAGCTGTGTTTCGGTCGTACCTGGTATGTTATAATTTGTTAGATTTGATGGCT…	GbaIQD30	MGKTAKWLKSLLTGKKDKSRNISNNQNSSVVPENPTTTVSIPLPPTTPKEKRRWSFRRSSASATPVRELNSVEQVVTPSPPPPPAPPVVTDVIRVSGSADDEKVDAGEEAAAKMIQAVFRSYLARKALKALKGIVKLQALVRGHLVRRQASVTLKCMQALVTAQARARAQRIRMVEDSRPASRRQSPHRRSTTPDQRLRHGYHEIDSGLEENIKIVEIDHGDSKASLQSRNSYSMEHRFSNHQASPVTSSYLADQISPGACSGHFEDRFFTVAQSSPHYAESETFEYSFCPNYMANTESSRAKARSQSAPKSRPDSIERQPSGRRRSSTEGRNHVPKAMKMKRSSSHVGAAEKNSQYQYQYQYPWSIKLDRSSVSLIDSECGSTSTVLTNTNYCRSHFG…	GbaIQD30	ATGGGGAAGACAGCGAAATGGTTGAAAAGCTTGTTGACTGGTAAGAAAGACAAAAGTAGAAACATAAGTAATAATCAGAATTCTTCAGTTGTCCCTGAGAATCCAACGACGACCGTTTCGATCCCACTGCCACCGACAACTCCTAAAGAGAAACGACGATGGAGTTTCCGGAGATCTTCGGCTTCAGCGACGCCTGTTAGGGAGTTGAATTCTGTAGAACAAGTGGTTACCCCTTCACCTCCACCACCACCGGCTCCGCCGGTTGTGACCGATGTGATCCGGGTAAGTGGTAGTGCTGATGATGAGAAAGTTGATGCAGGTGAAGAGGCGGCTGCTAAGATGATTCAAGCTGTGTTTCGGTCGTACCTGGCAAGGAAAGCTTTGAAAGCGTTGAAAGGG…
GB_A10G0313	GB_A10G0313.1	GbaIQD31	ATGGGTTCTGGAAATGTGTTGAAGACACTAGTGAATATAGTGAAGGATGACAGCTCAAAGCAAGTGAAGGTATATATATCATTATTTTACTTAACAATCATAAGCTAAGTTCTGCAAGCTTTCTGTTATCCTGTTATGAATAAAATCTGAGTTTGGTTCTGAAATAATTCATTTTCTATTTGAATCTTTTGGACTAATGTTATCCAAATTCCAAACCCTTTTGGGAAGTGTAATCTTGTGTACCATTGGAATGACAAATTTTGAGGCTTTTAGTTACTTTTTTCTCAACGAATCCGAGCTCATATTCGGCTATAAGTGTCACTTCTATACCTTCCCTGACACCATTTGTTCAATTTGGTTGTCATATGCCAACATCTGAATATGTGTTTGGATGGTTAT…	GbaIQD31	MGSGNVLKTLVNIVKDDSSKQVKRSSGSTKSKGFKWKKLQRKTSMRTKFIRDSAALGMSIEDLAATRIQTAFRAYRARKKLRLLKGIVRLQAKTRTYSIKKQATTTLHYLHSWSNIQAQIRARRLCMVTEGRLRQKKIANQLKLEAKLHELEVEWSGGPGTMEEVLTKIHQKEAAAVKRERTMAYAFSHQWRAPNSINNGLGSYRLAKANWGWSWVERWIAVRPWERRLPTPSTTPKSTPKEPQNKQTSKGGKNSNSPKPKASVSVKPPLSNAKGAMKPRRLSYPGAEKPAARQVNTKTDKINIEKEEIST	GbaIQD31	ATGGGTTCTGGAAATGTGTTGAAGACACTAGTGAATATAGTGAAGGATGACAGCTCAAAGCAAGTGAAGAGATCTTCTGGTTCTACAAAATCCAAAGGCTTCAAATGGAAGAAACTCCAGCGAAAGACTTCCATGAGAACAAAATTTATTAGAGATTCCGCTGCTCTTGGTATGTCAATTGAGGATTTAGCAGCAACTCGGATTCAAACCGCATTCCGAGCCTATAGGGCTAGAAAAAAATTACGTCTATTGAAAGGTATAGTAAGATTACAGGCTAAAACCCGAACTTATTCAATCAAAAAGCAAGCTACAACAACATTACATTATCTTCATTCATGGAGCAACATACAGGCTCAGATAAGAGCTCGTCGACTATGTATGGTAACGGAAGGCCGCCTT…
GB_A10G1649	GB_A10G1649.1	GbaIQD32	ATGGTGGTGGAAGACCTTAGTTTCAGGCCTATAGCCTCCTTTGTGAGTAGTTTTAATTCTCTTTTAATGAGTAGTTTTGGGACCTTATCCTTATGAATAATCAATCTAATATTATTGTGTTTACAAAAGTTTCCATGTCGTAACATTTGTTCTTTATTTAAGAACTTTTGCATCATGAAAAGCCTGAAAAGTTTCCAAGTCATAACGCTTATCAAGCAGTTTAATCAGATTTCATGGTTGAAAACTTGAATTTTAGAATCTGCATGAAACAGTAAATGTTTTGATTAATGCATTGTTTTTCATCCTTATCTTTCATGATAGACACTATGCTGTATAGCACTGTAATTACATTAGATCTTATGCATCTCTTTACGACTCCAGATAGGACCGTCGTTTTGG…	GbaIQD32	MVVEDLSFRPIASFIGPSFWPLHEWIFAGFFWLFCFFTCLDQQSNAGSMGKKGSWFSAIKRVFIPHSKEKLSNESDKRSGKEKKKKGLGKLRHGETNSFIPLFREPSSIEKILGEAEREHKLVFRPPTPPEQPATPPFVPHKDASPRVPSQRIASPRIASPRAASPRTVSPPRAASPRAAPPKVVRPRPEPTLRNHHASATKIQAAYRGYMARRSFRAWKGLVRLQGVVRGQNVKRQTSTAMKRMQLLVRIQSQIQSRRIQMLENQARQEVHFKNDKEVESTLGKLAFSQASETGNEDWDDSVLPKEEIEARMQRKVEAVIKRERAMAYAYSHQLWKTTPKTVHADIRTRGFPWWWNWLERQLSSSNTPESQGIKNFQLTPPRPNSELKPSPEPPLSSK…	GbaIQD32	ATGGTGGTGGAAGACCTTAGTTTCAGGCCTATAGCCTCCTTTATAGGACCGTCGTTTTGGCCCTTGCACGAGTGGATTTTTGCTGGCTTTTTTTGGTTATTCTGTTTCTTCACATGCTTAGACCAACAAAGTAATGCTGGCAGTATGGGAAAGAAAGGAAGTTGGTTTTCTGCAATTAAAAGGGTTTTCATACCACACTCCAAGGAAAAGCTAAGTAATGAATCGGATAAACGAAGTGGTAAAGAAAAGAAGAAGAAAGGCCTAGGAAAATTAAGGCATGGAGAAACCAATTCCTTTATTCCCCTCTTTAGAGAGCCCAGCAGTATTGAGAAAATTCTTGGGGAGGCTGAAAGAGAGCATAAACTAGTATTCAGGCCTCCAACACCTCCAGAGCAGCCA…
GB_A10G2849	GB_A10G2849.1	GbaIQD33	ATGGCGAAGAAGAAGAGCTGGTTCAATCTAGTGAAGAGGTTCTTTCTCTTTGAGACACTTATAAATGCACAAAAGGTAACTCCTCACCCCCCCCCTTTCCTTTTGCTGTTCTTGTATGGATGAATGGCTGTCATGGATGTTAATATGTTATATATATCTGTCGGTAGGATAACAGAAGGAAATGGATGTTTGGAAGGTTTAGGACCAAAAGGTTAGCATCCATTAAAGCTCCATCACCACCAAGAGACAGCATAAAATATGAAACAGAGGAGGACCAGAAGAAACATGCCTTAACAGTGGCAATTGCCGCAGTGGCTGCTGCTGAAGCAGCTGTTGCAGCTGCTCAGGTTGCAGCCGAGGTTGTTCGCCTCACAGGCAATGACGCCCCTAAAGCTAAAG…	GbaIQD33	MAKKKSWFNLVKRFFLFETLINAQKDNRRKWMFGRFRTKRLASIKAPSPPRDSIKYETEEDQKKHALTVAIAAVAAAEAAVAAAQVAAEVVRLTGNDAPKAKEEQTNDVKPDCSSSSELGNKFQQLAAIKIQASFRGYLARKALRALKGIVKLQAIIRGRVVRRQALTALKCLQSIVNIQSQVCARRFQIVEGTWQQHDENKELITLKDKILKVDTNSQTRWDNCNGGLKYWLDQWVDTKSKDVEVEDIDSVWTSNRKATRLKTFSRQYHCDAEGVDSPVRVQGRRSFHGKQSSLGEDSSFITSPVVPTYMAATQSTKAKVRSMSSPKLRPGTCDTQSESYSPYKNKSCLLSSVTSKPNAYEQRSPTLKGVKSKKTLKDLSFNS	GbaIQD33	ATGGCGAAGAAGAAGAGCTGGTTCAATCTAGTGAAGAGGTTCTTTCTCTTTGAGACACTTATAAATGCACAAAAGGATAACAGAAGGAAATGGATGTTTGGAAGGTTTAGGACCAAAAGGTTAGCATCCATTAAAGCTCCATCACCACCAAGAGACAGCATAAAATATGAAACAGAGGAGGACCAGAAGAAACATGCCTTAACAGTGGCAATTGCCGCAGTGGCTGCTGCTGAAGCAGCTGTTGCAGCTGCTCAGGTTGCAGCCGAGGTTGTTCGCCTCACAGGCAATGACGCCCCTAAAGCTAAAGAAGAACAAACCAATGATGTTAAACCTGACTGTTCTTCATCTAGTGAGCTTGGCAACAAGTTCCAACAACTTGCTGCTATAAAAATCCAGGCT…
GB_A11G0178	GB_A11G0178.1	GbaIQD34	ATGGTAAACAAAACACCGACCTCGTGGTTGTCAATGGTGAAAAGGGCTCTCGGGTCTAATGCTAAAGATAACGAGAAAAAAAGTTGCAGAACAAGAGAGAAAAGAAGATGGCTATTTAAATGGTCTCAACAACGTAAACCCAAAACCAAATCACAATCCATTGCAGCTGTTAACATCGTTAGGCTTAATTGCAGGGCTTCCAATTACGCCATTGTTGGAGAAAAAAACCAAGCTGCTATTGTCATTCAAACAGCTTTTAGAGGCTACATAGTAAGTGAAAGATTCTCTCTCTATATATAATTAACTGTTCATTTAGTGTTTTTATTTTTTATTTTTTTTTGTGAAAGGCAAGGAAAGCATTGGGAGCATTGAAAGGGGTAGTGAAGCTTCAAGCTTTAG…	GbaIQD34	MVNKTPTSWLSMVKRALGSNAKDNEKKSCRTREKRRWLFKWSQQRKPKTKSQSIAAVNIVRLNCRASNYAIVGEKNQAAIVIQTAFRGYIARKALGALKGVVKLQALVRGHNVRRRAKVALKCMQSLVRVQNRVLLHQQRARLSYEGCRRAMFIESNSSWESPCLQDLRRRKSITLDKDEKEVEEATKWLDRRRATKQWESHNRASIDKRDSIREPMQLRLPSLRCLKEKSSYHSAANSPRLTMVPNYMAATESAKAKVRSRSTTRQRPGNAERDGGGQISPRSTSDLRWMKL	GbaIQD34	ATGGTAAACAAAACACCGACCTCGTGGTTGTCAATGGTGAAAAGGGCTCTCGGGTCTAATGCTAAAGATAACGAGAAAAAAAGTTGCAGAACAAGAGAGAAAAGAAGATGGCTATTTAAATGGTCTCAACAACGTAAACCCAAAACCAAATCACAATCCATTGCAGCTGTTAACATCGTTAGGCTTAATTGCAGGGCTTCCAATTACGCCATTGTTGGAGAAAAAAACCAAGCTGCTATTGTCATTCAAACAGCTTTTAGAGGCTACATAGCAAGGAAAGCATTGGGAGCATTGAAAGGGGTAGTGAAGCTTCAAGCTTTAGTGAGAGGGCACAATGTGAGAAGACGAGCAAAGGTGGCACTAAAATGCATGCAATCTTTGGTTCGAGTACAAAATCGA…
GB_A11G0329	GB_A11G0329.1	GbaIQD35	ATGGGAAAATCACCGGGAAAATGGATTAAGGCTGTGCTTTTTGGAAAGAAATCTTCCAAAACTGGTTATCATAAAGGAAGGGAGGTAATATTTATTGCTAATTACTACTAAACGAAAAATATAATGTTTAGATTATGTACATGAGGAACTGCAAATATAGTTCCTCTGTCATTTGGTTTATTTTTGGTGGCTTCATTCCCTCTACTGAGAAAGTTAAGTAATTGTAAAGGATTAGCTGATTTGGACGGTAGCTTCCCCGAAATTTCTCGGGAGCTGTTGTATTTAACATGGCTGTTTTGATGCTTTGGTTTTGGGAATGTATCATTCTTTCCTCGAGTTATGAGATAAACATGATATGGCATCTTTCTTCCATCAATCCTAAAATATTAATGTACACTT…	GbaIQD35	MGKSPGKWIKAVLFGKKSSKTGYHKGRENVANVNEVLVSARASEAEVPVAPPFPSQLNQYANERNERDERKLELENKEAANISNDDRISLPVSQGIDSQESTLQYFQNDPERMKQKQAATIVQAAFRGYLARRAFWALKGIIRLQALIRGHLVRRQAIATLCCVMGIVKLQSHIRGVMARRSDGGLEVQKKYKQMNLWESKPVVSLGVNMPARIGKLSANAFARKLVASSPPVMPLHLHDDAGEPNSVCNWLERWSASCFWKPVPQPKKASKLQKKQTNGQVVETDSGRPKLSVRRIRPANLDCASVQATSEFDKPKRNLRKVSSHPAEMAVQENPQNELEKVKRNLRKVHNPVVENSVQSQVESDKQKQSLEKFPSATNPDIVEQSLNSLAEKANKEM…	GbaIQD35	ATGGGAAAATCACCGGGAAAATGGATTAAGGCTGTGCTTTTTGGAAAGAAATCTTCCAAAACTGGTTATCATAAAGGAAGGGAGAATGTTGCCAATGTAAATGAGGTGCTGGTTTCAGCCAGGGCATCAGAAGCTGAAGTCCCTGTGGCTCCTCCTTTCCCTTCACAGCTTAATCAATATGCTAATGAGAGAAATGAGAGAGATGAAAGGAAATTAGAACTGGAAAACAAGGAGGCTGCAAATATCTCTAACGATGACAGGATATCACTGCCAGTGAGTCAAGGCATAGATTCTCAGGAATCCACTCTTCAATATTTCCAAAATGATCCTGAAAGAATGAAGCAAAAGCAAGCAGCAACCATCGTTCAGGCTGCTTTTAGGGGTTACCTGGCTCGCCGA…
GB_A11G1059	GB_A11G1059.1	GbaIQD36	ATGGGGAAGAAAGGAGGGACTTCCTGGTTGACTGCTGTGAAAAGGGCTTTTAGATCTCCGACTAAAGACGGTCATGATAAGAGAAGTAACAGAAGAAAGGATGAACCTGACCACCAAGATGAGGATGAAGACAAGGTTTGTATTATAGTATCAATGAACTCTTCATTCATTTCTATACATGAAAACAGAAGAAAACAAAACAAAAATAATAATAATAATAAATGAAGTTGAATCTTTTACAGTAAATATAATTCTTGATCTGTTACTGGTTTTGGTAGAAGAGAGAGAAGCGAAGGTGGATCTTCAGGAAAACTACAATTCAAGAACCGGTGATTCATCAGCAAAAAACACCAGTGAAGGCTACAGGTCGTAATGGTGCAGGTGCAGCATCAGATGGTG…	GbaIQD36	MGKKGGTSWLTAVKRAFRSPTKDGHDKRSNRRKDEPDHQDEDEDKKREKRRWIFRKTTIQEPVIHQQKTPVKATGRNGAGAASDGATATAAEQRYDIPMAATEGAAVVQVARPTRPSNYAREHHLAAIVIQTTFRGYLARRALRALKGLVKLQALVRGHNVRKQAKMTLRCMQALVRVQARVLDQRVRLSHDGSRKSAFSDTNSVLESRYLQDISDRRSLVSREGSSIADDWDERPHTIEEVKAMLEHRKEAALKREQNLSQALSQQMRRARRSPSMGDEDEIDGRPKWLDRRTPAKPWDNRGRASTDHRDSVKTVEIDTSQPYSYLAPTYIRTNSNQYHQHGPQNQRPSSPLHRAQQNAPMHHSPITPSPSKARSIQVRSSSPRCVRGDRSSVSSQTP…	GbaIQD36	ATGGGGAAGAAAGGAGGGACTTCCTGGTTGACTGCTGTGAAAAGGGCTTTTAGATCTCCGACTAAAGACGGTCATGATAAGAGAAGTAACAGAAGAAAGGATGAACCTGACCACCAAGATGAGGATGAAGACAAGAAGAGAGAGAAGCGAAGGTGGATCTTCAGGAAAACTACAATTCAAGAACCGGTGATTCATCAGCAAAAAACACCAGTGAAGGCTACAGGTCGTAATGGTGCAGGTGCAGCATCAGATGGTGCAACCGCAACGGCCGCAGAGCAAAGGTATGATATTCCTATGGCAGCAACCGAGGGTGCAGCAGTGGTACAAGTGGCTCGCCCAACTAGACCTTCAAATTATGCTAGAGAGCACCACCTTGCTGCCATTGTTATTCAGACCACT…
GB_A12G1395	GB_A12G1395.1	GbaIQD37	ATGGGGAAGAAAGGAGGGACTTCATGGTTGACTGCTGTGAAAAGGGCTTTTAGATCTCCTACTAAAGATACCCATGATGATGAAAAGGTAAGTGTTTCAATCTATTTTAATGGCTGTTTATGAATATAAAAAGAAAAGCCTTTGATTTTTTATTTTTTTTATATAGAAGAGAGATAAACGGAGGTGGATCTTTAGGAAACAAGATACAAGTCCTGTGAAGAGTGTAGGTAATAATGGTGGTGGTGGTGGTGGTGCAAGTACGGCAGCAGCGGAGAAAAGGCATGCTATTGCTGTGGCGGTGGCGGTGGCTAAAGCAGCGGAAGCTGAAGCTGCGGTGGCGACTGCACAAGCAGCTTTACAAGCTGCTCGGTTGACTAAACCTAGTTATGGCAGGAAACA…	GbaIQD37	MGKKGGTSWLTAVKRAFRSPTKDTHDDEKKRDKRRWIFRKQDTSPVKSVGNNGGGGGGASTAAAEKRHAIAVAVAVAKAAEAEAAVATAQAALQAARLTKPSYGRKHHFAAIVIQTAFRGYLARRALRALKGLVKLQALVRGHNVRKQAKMTLRCMQALVKVQSRVLDQRMRLSHDGCSRKSAFSDTWESRYLQDISDRRSLSRGGSSIADDWDERPHTVEEVKAMLQHRKEAALKREKSLSQALSQQMRRARRSPSMGGQDEWLDRWMPAKPWDNRGRASMDQRDNVKTVEMDTSQPYSYVAQNYRRTNSNHYHQRPSSPLHRAQHNAQAFHPSPITPSPSKTRPVQVWSASPRCVREDRTSFSSSQTPSLRSNYYYTGRVSTQASTSINNAITLPNY…	GbaIQD37	ATGGGGAAGAAAGGAGGGACTTCATGGTTGACTGCTGTGAAAAGGGCTTTTAGATCTCCTACTAAAGATACCCATGATGATGAAAAGAAGAGAGATAAACGGAGGTGGATCTTTAGGAAACAAGATACAAGTCCTGTGAAGAGTGTAGGTAATAATGGTGGTGGTGGTGGTGGTGCAAGTACGGCAGCAGCGGAGAAAAGGCATGCTATTGCTGTGGCGGTGGCGGTGGCTAAAGCAGCGGAAGCTGAAGCTGCGGTGGCGACTGCACAAGCAGCTTTACAAGCTGCTCGGTTGACTAAACCTAGTTATGGCAGGAAACATCACTTTGCTGCTATTGTTATTCAGACAGCTTTTAGAGGCTACCTGGCCAGGAGAGCTCTACGTGCGTTAAAAGGGCTA…
GB_A12G2702	GB_A12G2702.1	GbaIQD38	ATGGGAAAGAACACTGCTACCTCGTGGTTGTCAATGGTGAAAAAGGCCTTTAGGTCTCCAGGTAAAGATTATGAGAAAAAGAGTAGCAGAAGGAGAGAAGAATGTGGGCATCAGGAAGAGGATGAAAAGGTACGTAGTATATAGTAATTAAAAACTTCATCATTCTCTTAAATTTATTTTTTGTAGTATAATTTATTTAATTGAGTTGGTGGTGGGTGCATGGCTTTTTTTGGGGTTGTGCAGAAGAGGGAGAAAAGAAGATGGCTGTTTAGAAGGGGCAATAGTAATATCAATCATGTCCAACAGTGTGAAGCAAAGACACCAACACCAACAACATCGACAAGTACTGCTGCACCACCTGCGAACAATGCAGCAGAAACAGCATTGGATTTTGCAGAA…	GbaIQD38	MGKNTATSWLSMVKKAFRSPGKDYEKKSSRRREECGHQEEDEKKREKRRWLFRRGNSNINHVQQCEAKTPTPTTSTSTAAPPANNAAETALDFAEQRHAIAVAAAEAAVATAQAAVEIVRLSSRPSNYANVREHYHYAAIVIQTAFRGYLARRALRALKGLVKLQALVRGHNVRRQAKLALKCMQSLLRVQDRVRDQQRARLSHEGYRRKSMFDETNALWETRYLQDIRRRKSMSRDMSCTTDEWDDRPQTSEEIEALLLTKKEAALKREKALAYAFSNQIWRSRRNPSAEDEKEVEERTKWLDRWMATKQWDNNNRVSTEKRDSIKTVEIDSYKLQSYSSPTIRRPHSFFLNQFPPTPSPCKTKPLQVRSASPRCLKEEKCYTSAANTPSLASTYCTT…	GbaIQD38	ATGGGAAAGAACACTGCTACCTCGTGGTTGTCAATGGTGAAAAAGGCCTTTAGGTCTCCAGGTAAAGATTATGAGAAAAAGAGTAGCAGAAGGAGAGAAGAATGTGGGCATCAGGAAGAGGATGAAAAGAAGAGGGAGAAAAGAAGATGGCTGTTTAGAAGGGGCAATAGTAATATCAATCATGTCCAACAGTGTGAAGCAAAGACACCAACACCAACAACATCGACAAGTACTGCTGCACCACCTGCGAACAATGCAGCAGAAACAGCATTGGATTTTGCAGAACAACGGCACGCAATTGCCGTTGCAGCTGCTGAAGCTGCTGTGGCAACAGCACAAGCGGCTGTTGAGATCGTTAGGCTTAGTTCTAGACCTTCCAATTATGCCAATGTTAGAGAA…
GB_A12G2789	GB_A12G2789.1	GbaIQD39	ATGGGAAAGAAAGGGAGTGGATGGTTCTCGACGGTGAAGAAAGTGTTCAAATCTTCTCACAAAGACTTGCCTGACAAAAAAGTAACGTATTTTTTCATTGGTTTTTAGATTTTTTTTTTTTTTGCCTTTTGATGTTTGTTTAGCAGGTTGATTTGATTGCCATATTTCCAAGCAAAACCAATGGCACCTTTCAAGTTTTTTTTTTCATTTTAAGGCAATTTTTTAATAAATGCAGGGAAAAAAAAGAGAGAGCAAACATCTACATCACAAACATCTGGATTTTTGCTTGTATTTATTTGGGTTCTTATCTTTTTGTTGTTAGAACTTAGGTTAACTATATAGTGCCCAGGTTTGCAAGTACATTACAAATTCTCTTTGATCTTACTCATTTGTGGTCAT…	GbaIQD39	MGKKGSGWFSTVKKVFKSSHKDLPDKKRENNVEKWPNEAPDVVSFEHFPAESSPDITNNESAMSTPLNEDRNHAIAVAMATAAAAEAAVAAAQAAAKVVRLAGYGRQSKEERAATLIQSYYRGYLARTALRALKGLVRLQALVRGYNVRKQAQMTMRCMQALVRVQARVRARRLQLTDHDKIPKRSDEDDEEKKGTGEVERKPRSLLKRYDSWDGGQQSSEKVKESVSKKHDAAMRRERALAYAYGYQQQPQQQLMQPHPNGKDVGVHLNDREKAQWGWNWLEHWMSSQPYHARQLGHQEGSYMTLPTTTATTTVTDNMSEKTVEMDVVTAMDSGSYSTLQQAQSGSSNVPSYMAPTQSAKAKVRSQGPMIMKQQRVPHAPQWNPSTKKSPGCDSSSSG…	GbaIQD39	ATGGGAAAGAAAGGGAGTGGATGGTTCTCGACGGTGAAGAAAGTGTTCAAATCTTCTCACAAAGACTTGCCTGACAAAAAAAGAGAGAATAATGTGGAGAAATGGCCAAATGAGGCCCCGGATGTAGTGTCGTTTGAACATTTTCCGGCGGAGAGTTCACCGGACATCACGAATAATGAGAGTGCCATGTCGACTCCTCTGAATGAAGATAGGAACCATGCCATTGCTGTCGCCATGGCAACTGCTGCTGCTGCAGAAGCAGCTGTTGCGGCAGCTCAAGCTGCCGCTAAAGTCGTCCGGTTGGCGGGTTATGGACGACAATCTAAGGAAGAAAGAGCTGCAACGCTTATACAGTCGTATTATAGAGGCTATCTGGCTCGGACAGCTTTGCGTGCTTTG…
GB_A13G0119	GB_A13G0119.1	GbaIQD40	ATGGGAAAGAAAAGGAGCTGGTTTAGTTGGGTGAAAAAGATTTTTGCTTCTAATGCACAACCAAAAACACAGAAGGTTCATTTTCAGTACTTGTTACTTTTCAACTTTTGCTTCTTTCTTTTTATTTTTTTTTTGAATAATTAATAGCTTTTTGATTCATCTTTTTGGTTCTTTTTTCCTTTTTGTTTGTAATAATTTCGGTTCTACTTTTCAGAAATCAAGGAGGTGGAGATGGATTTTCGGAAAACTAAAGCTCAAGCAATGTCGCCCTGCATTGCCGGCGATACCCCAGCAGAAATCGTTATGTCAAGCAACCGAGGATCAAAGAAAGCATGCTTTGAATCTTGCCATTGCGACAGCTGCTGCAGCTGAAGTTGCGGTTGCTGCAGCACAAGCAGC…	GbaIQD40	MGKKRSWFSWVKKIFASNAQPKTQKKSRRWRWIFGKLKLKQCRPALPAIPQQKSLCQATEDQRKHALNLAIATAAAAEVAVAAAQAAAQVVRLANASNHFSNFTTRDRNRAAIKIQTAFRAHLARKALRALKGLVLLQAIIRGQVTRRRAMKNMKCLQSGTDMYPEIKEKVICQDTRRNQSLVHKDQLQGKDIIKHEYYSRRNWNDSVFSKEDAEAVWLRRQEAMAKRERMKKYSYSHRERVNSYMLDESVHVEETGRNSFVEAEANSEGTRRERMMILKHNVASNSSRWEVHGLHGLNSPYLFPRRSFCRVQNQNPAGNESSVPSSPVFPTYMAATESAKAKVRSMSTPRQRLGLPDTCFDHNMPYKGGLSLWSTYNGETFEYQ	GbaIQD40	ATGGGAAAGAAAAGGAGCTGGTTTAGTTGGGTGAAAAAGATTTTTGCTTCTAATGCACAACCAAAAACACAGAAGAAATCAAGGAGGTGGAGATGGATTTTCGGAAAACTAAAGCTCAAGCAATGTCGCCCTGCATTGCCGGCGATACCCCAGCAGAAATCGTTATGTCAAGCAACCGAGGATCAAAGAAAGCATGCTTTGAATCTTGCCATTGCGACAGCTGCTGCAGCTGAAGTTGCGGTTGCTGCAGCACAAGCAGCAGCCCAGGTCGTTCGTCTGGCTAATGCCTCTAACCACTTCAGTAATTTCACAACAAGGGATAGGAACCGAGCTGCTATTAAGATCCAAACCGCTTTCAGGGCACATCTGGCAAGGAAAGCCTTACGGGCACTAAAGGGA…
GB_A13G0802	GB_A13G0802.1	GbaIQD41	ATGGGAAAATCTCCAGCAAAATGGATCAAGACCTTACTTCTTGGGAAGAAATCTTCAAAGTCCAGTTTCTCAAAAGGAAAAGAGAAGCTGGTGAGGAAGTACTAATTATCTTCAAATATTAAATAGCTTTTGAAATGTTGCATTTTCTAATTTTGTTGATTATTATGTTCAGAAATCTGCAAATAAAGGTGAGGTTTTGGTTTCTTCCAAGGTGACTGTGTCTGACCTATCAGTGGATCCTCCATCAATTTCAGCACCTATTCTAGTGAATAGCGCTAGGAATGTGGTGGACTCTGAGAAGGGTATACCTGCCCAATTGCCAAATGATGGGGCAAATATTCCATCTCCAAAAGTGGATGGAAATGATGCCACAACTGGTAATTTTGGTAACCCAGAAAA…	GbaIQD41	MGKSPAKWIKTLLLGKKSSKSSFSKGKEKLKSANKGEVLVSSKVTVSDLSVDPPSISAPILVNSARNVVDSEKGIPAQLPNDGANIPSPKVDGNDATTGNFGNPENPDRIGLDPAAVTVQAAFRGYLARRAFRTLKGIIRLQAVIRGHLVRRQAVATLCCTWGIVKLQALARGQKVRCSDIAMEIQEKHLRLLQGSKSSDSIGVSTSSKVKNLSNNVFVQKLLASSPSVLPLQLQYVPEEPNSSWQWLLRWTMSHFWVSPLKPVRSGKTKRSIQKLSNAKVVNGSSHSTLEHEKNKRGLRRVSGNSAADSVRKHPQNELERVKRSLRKLSDSSKEVSDKSEVFNEKTKKTLKKTSNSNDPDFSEQESAEKIRDVTATLSELSILKADLKMSLEDPSLGE…	GbaIQD41	ATGGGAAAATCTCCAGCAAAATGGATCAAGACCTTACTTCTTGGGAAGAAATCTTCAAAGTCCAGTTTCTCAAAAGGAAAAGAGAAGCTGAAATCTGCAAATAAAGGTGAGGTTTTGGTTTCTTCCAAGGTGACTGTGTCTGACCTATCAGTGGATCCTCCATCAATTTCAGCACCTATTCTAGTGAATAGCGCTAGGAATGTGGTGGACTCTGAGAAGGGTATACCTGCCCAATTGCCAAATGATGGGGCAAATATTCCATCTCCAAAAGTGGATGGAAATGATGCCACAACTGGTAATTTTGGTAACCCAGAAAATCCTGATAGGATTGGGCTTGACCCAGCTGCTGTGACAGTACAGGCTGCTTTCAGAGGTTATCTGGCTCGCAGGGCATTTCGA…
GB_A13G0804	GB_A13G0804.1	GbaIQD42	ATGGGGAAATCTCCAGCGAAATGGATCAAGACCTTGCTTCTTGGGAAGAAATCTTCAAAGTCCAGTTTCTCAAAAGGAAAAGAGAAGCTGGTAAGGAAGTATTAATTATCTTCAAATGTGAAATAGCACTTGAAGATTGAAAATGTTGCATATTCTAATTTTTGTTGATTATCATGGGCAGAATTCTGCAACTAAAGGTGAGGTTTTGGTTTCTTCCAAGGTGTCTGACCTATCAGCGGATCCTCCATCGATTTCAGCACCTATTCTAGTGAGCCGTGTTAGGAATGTGGTGGACTCTGAGAAGGGTATACCTGACCAATTGCCGATTGATGGGGCAAATATTCCATCTCTAAAAGTGGATGGAAATAATGCCACAACCGGTAATTTTGGTAACCCAGA…	GbaIQD42	MGKSPAKWIKTLLLGKKSSKSSFSKGKEKLNSATKGEVLVSSKVSDLSADPPSISAPILVSRVRNVVDSEKGIPDQLPIDGANIPSLKVDGNNATTGNFGNPENPDRIRLDPAAVTVQAAFRGYLARRAFRILKGIIRLQAVICGHLVRRQAVATLCCTWGIVKLQALARGQKVRCSDIAMEIQEKHPRLLQGLKSSNSIGVSISSMVKNLSNNVFVQKLLASSPSVLPLQLQYVPEEPNSSWQWLQRWTRSQFWEYPSKPIRSGKTKLSVQKLSNAKAVNGSSHSTLEHKKNKRGLRRVSVNSAADSVWEHPQNELERVKRNLRKLSNSSKEVTNKSEFVNEKTKKTLKKYSSSNDPDVLEQESAEKIRDVTATLSELSILEADLKFSSEDASLGEPI…	GbaIQD42	ATGGGGAAATCTCCAGCGAAATGGATCAAGACCTTGCTTCTTGGGAAGAAATCTTCAAAGTCCAGTTTCTCAAAAGGAAAAGAGAAGCTGAATTCTGCAACTAAAGGTGAGGTTTTGGTTTCTTCCAAGGTGTCTGACCTATCAGCGGATCCTCCATCGATTTCAGCACCTATTCTAGTGAGCCGTGTTAGGAATGTGGTGGACTCTGAGAAGGGTATACCTGACCAATTGCCGATTGATGGGGCAAATATTCCATCTCTAAAAGTGGATGGAAATAATGCCACAACCGGTAATTTTGGTAACCCAGAAAATCCTGATAGGATTAGGCTTGACCCAGCTGCTGTGACAGTACAGGCTGCTTTCAGAGGTTATCTGGCTCGCCGGGCATTTCGAATCCTC…
GB_A13G1031	GB_A13G1031.1	GbaIQD43	ATGGGGAAGAAAGGAAAATGGTTGTCTTCACTAAAGAAAGCCTTCACCCCAGAATCCAAGGAAAAGAAAACCCAGGTCTGAAAGAAGTCCAATTCAGCTATAAATTACCCACAGTTTATTAGTCTTCAATGAGTGTTTTTAATTTTCTTTATTGCTATGTTTTTTTTTTTCAGAAATCCAAAGAAAAGGTTTTGGTAAAGCAAGTGGATTGGGGTTCCAATGATTCTGATGCAGCCACTTTAGAAACTCTCAAGTTGTCCCCTCCTCCCCAGCCACAAGAGGTGAAATTAATCGAAGCCGAGGTTGAACCGAGCGAGCAAACTTACCCTGTGGAAGTTGCCATTGCTGCTGCTGCTGCTGTGGCTTTGGCCGCTCCAGCTGAGGCAGTTGCGGATGTCG…	GbaIQD43	MGKKGKWLSSLKKAFTPESKEKKTQKSKEKVLVKQVDWGSNDSDAATLETLKLSPPPQPQEVKLIEAEVEPSEQTYPVEVAIAAAAAVALAAPAEAVADVVRRQSNTGPRFAGKSNEEVAAIKIQTAFRVYLAKRALHALRGLVRLKSMMEGPMVKRQAAGTLRCMQKLSRVQCQIRLRRIRMTEENQALQRQLLQKHAKEIVNLQMGEDWDDSLQSKEQIEASLLSKHEASMRREKAMAYSFTHQQTWKNASRSMNALFMDPNNLSWGWSWLERWMAARPWEGRGMAEKEQNNDQSSVKSGRSSFGGDISKAYARYQLNLDKQSLKASQKPSRTSSLQSPSTPKPVSMPTQKLKSPSPRSSVVAPDDDMRSTVSVLSERNRRHTIGGSSVLDDESLAS…	GbaIQD43	ATGGGGAAGAAAGGAAAATGGTTGTCTTCACTAAAGAAAGCCTTCACCCCAGAATCCAAGGAAAAGAAAACCCAGAAATCCAAAGAAAAGGTTTTGGTAAAGCAAGTGGATTGGGGTTCCAATGATTCTGATGCAGCCACTTTAGAAACTCTCAAGTTGTCCCCTCCTCCCCAGCCACAAGAGGTGAAATTAATCGAAGCCGAGGTTGAACCGAGCGAGCAAACTTACCCTGTGGAAGTTGCCATTGCTGCTGCTGCTGCTGTGGCTTTGGCCGCTCCAGCTGAGGCAGTTGCGGATGTCGTTCGTCGTCAATCCAATACAGGTCCACGGTTTGCTGGAAAATCTAATGAAGAAGTGGCAGCCATCAAAATTCAAACCGCTTTCCGAGTTTACCTTGCA…
GB_A13G1333	GB_A13G1333.1	GbaIQD44	ATGGGAAGAGCAAGCAAATGGCTGATAAGCTTCTTGTTAGGAAGGAAAGATGATAAAGGTAAATGGAAGAACATTTCCAAATCTTTTGAAGATCAAGGAAGTTTGATGGCAATCCCATCTGCAATTCCACCTGCAAGTCCTTTTAGGTGCTTATGGAGTTTTCGGAAGCCGGTGGCCGCGTCTGAAGTTCGAGCTCTTAAAGGTTCGAGGTCTTTCGGTTCAATGATTGCTACTTCACTTGCAAAACCAGCTGTATTGGACATGGAGAATCAACATGACAAGACCAGAGTCTCTTCAGTGGCAATATCTAAAGCAATAGAAGATGTCGCTGCAACGCGGATTCAAGCTGCCTTTCGATCGTATTTGGTACTAAATTACGAATCCTGGGATTTATTATAG…	GbaIQD44	MGRASKWLISFLLGRKDDKGKWKNISKSFEDQGSLMAIPSAIPPASPFRCLWSFRKPVAASEVRALKGSRSFGSMIATSLAKPAVLDMENQHDKTRVSSVAISKAIEDVAATRIQAAFRSYLARKALHALKGLVKLQALVRGQLVRKQATSTLGSMHALMAIQVRARIHRIQMAAEPRLNPKSLLLRYGRFPLEKEFKRAQKDEQHGTFKSSKVETLEQRDPKNYFEELSKQNYKEFSFTTYTSPRHCPPLKSKPTPARSSFSSNEYHYMANTQFQGPKSGHKVNPNNDLHPTSKLKAKEGLQLKK	GbaIQD44	ATGGGAAGAGCAAGCAAATGGCTGATAAGCTTCTTGTTAGGAAGGAAAGATGATAAAGGTAAATGGAAGAACATTTCCAAATCTTTTGAAGATCAAGGAAGTTTGATGGCAATCCCATCTGCAATTCCACCTGCAAGTCCTTTTAGGTGCTTATGGAGTTTTCGGAAGCCGGTGGCCGCGTCTGAAGTTCGAGCTCTTAAAGGTTCGAGGTCTTTCGGTTCAATGATTGCTACTTCACTTGCAAAACCAGCTGTATTGGACATGGAGAATCAACATGACAAGACCAGAGTCTCTTCAGTGGCAATATCTAAAGCAATAGAAGATGTCGCTGCAACGCGGATTCAAGCTGCCTTTCGATCGTATTTGGCAAGGAAAGCATTGCATGCTTTGAAGGGATTA…
GB_A13G2121	GB_A13G2121.1	GbaIQD45	ATGGGAAAGGCAAGCAAATGGTTAGTAAACTTCTTGCTAGGGAGAAAAGATGATAAAGGAAAAAGGAAGAATTTGTCCATATCTTTTGATGAAGAGAATTTGGTTTCATCCCCATCCGCAACTCCATCGTCCGCATCTTCGTTTAAGCGGAGATGGAGTTTTGGGAAGTTGTCGAGTAAAGATCGAGCTCATAAGAGTTCCCGGTCACTTGACTCAATGATTGCAACTCCACTTTTGAAGCAAGCTGTATTCAATATGGAGATCCGGCATGATAACACGAGGGTTTTCACAATGGCCATGATGAATTCTAGCAGAAGGAAAACAAAAGCAAGATATGCAGCAGTGGAAAATGCGGCAGCGACCCAGATTCAAGCCGCTTTTCGTTCGTATTTGGTAATG…	GbaIQD45	MGKASKWLVNFLLGRKDDKGKRKNLSISFDEENLVSSPSATPSSASSFKRRWSFGKLSSKDRAHKSSRSLDSMIATPLLKQAVFNMEIRHDNTRVFTMAMMNSSRRKTKARYAAVENAAATQIQAAFRSYLARKALHALRGLVKLQALVRGYLVRKQTTATLRSMHALMSIQVRARFQRIQMADQSQLDVKSQSLRYGRFLQEMEFKRSQREGINEKHGLVKSQNGLMNHSQMERIEQGIIKYYSGELPILKRQPKHEEFSFTTHNSPRHSPPMSKATPARSSFSSHDYPYMPSYMANTQSSRAKLRSQSEPRQRPALNFKAKSKRITSAEEMDDDILPRYSFSQSKGVADEHQDPWIVKLYQSTIKPKVDTSSYK	GbaIQD45	ATGGGAAAGGCAAGCAAATGGTTAGTAAACTTCTTGCTAGGGAGAAAAGATGATAAAGGAAAAAGGAAGAATTTGTCCATATCTTTTGATGAAGAGAATTTGGTTTCATCCCCATCCGCAACTCCATCGTCCGCATCTTCGTTTAAGCGGAGATGGAGTTTTGGGAAGTTGTCGAGTAAAGATCGAGCTCATAAGAGTTCCCGGTCACTTGACTCAATGATTGCAACTCCACTTTTGAAGCAAGCTGTATTCAATATGGAGATCCGGCATGATAACACGAGGGTTTTCACAATGGCCATGATGAATTCTAGCAGAAGGAAAACAAAAGCAAGATATGCAGCAGTGGAAAATGCGGCAGCGACCCAGATTCAAGCCGCTTTTCGTTCGTATTTGGCAAGG…
GB_A13G2303	GB_A13G2303.1	GbaIQD46	ATGGGTTCTTCAGGGAAGTGGGTGAAATCTCTTATGGGTGTCAAGAAGAATGAAAAAGAAGACCAAGTAAGCTCCGGGTTTTTTTCTGCTTTGTTTCACAGCTACTATTATTTACATTTCTGCACCTAAGCTCTTTGTTATGAAGGAAAAAATGGGTGTCAAGAGTAAGAAATGGAAGCCATGGGGCTCTAAAGGGAAGTTCAGATCAGATTCTTCACCAAGGACTGCTGCAATGGCAGCACTAGCCCGAGCTCCTGCTAAAGATATCAGGGTTTTAAGGCAAGAAGGGGCTGCCATCCGCATCCAAACTGCTTTTCGTGGTTTCTTGGTAAATTGCAAACACCCGTGTTAGTCTCATAATTTTCATTTCTTTCATTGTTTGGTGTCCGTGAAAGTGAA…	GbaIQD46	MGSSGKWVKSLMGVKKNEKEDQEKMGVKSKKWKPWGSKGKFRSDSSPRTAAMAALARAPAKDIRVLRQEGAAIRIQTAFRGFLARRALRALKGIVRLQALVRGRQVRKQATVTLRCMQALVRVQARVRARRVRVSTEGRAVQKILDECHSKDDILKQAEDGWCDSKGTLEDAKTKLQMKQGGAFKRERALAYSLAQKQWRSKPGSTSQTNNSGLYTKYQEFDKNSWGWSWLERWMAARRWETRLMEPSQAESDPSDTTSPSKHCLEGKNARSSSPCFVEVRKNNISTRISAKPPNIGQVTHSSSSPSSEFRFNSSSASFSICTSSTPVSGNTTLNSTDKTEQSGNSRPDYMNLTESTKAKQRSRNKHVHMSRPPYPSTN	GbaIQD46	ATGGGTTCTTCAGGGAAGTGGGTGAAATCTCTTATGGGTGTCAAGAAGAATGAAAAAGAAGACCAAGAAAAAATGGGTGTCAAGAGTAAGAAATGGAAGCCATGGGGCTCTAAAGGGAAGTTCAGATCAGATTCTTCACCAAGGACTGCTGCAATGGCAGCACTAGCCCGAGCTCCTGCTAAAGATATCAGGGTTTTAAGGCAAGAAGGGGCTGCCATCCGCATCCAAACTGCTTTTCGTGGTTTCTTGGCAAGAAGAGCTTTGAGAGCTTTAAAAGGAATCGTGAGGCTTCAAGCATTAGTTCGCGGCCGACAGGTGAGGAAACAGGCCACCGTAACGCTTCGGTGTATGCAAGCTCTCGTTCGTGTCCAAGCTCGTGTTAGGGCTCGTCGTGTGCGG…
GB_D01G0558	GB_D01G0558.1	GbaIQD47	ATGGGTTCAGGAAACTGGCTTAGATCATTCATTTGTTTAAAGAAATATAAACCAAACAGATCCAAACAAGCAAAGGTACTACATGTGTTTTGCAATGACGCATTAATCCAACATGCTCGTGTTAGACACTGCATATCACTAATATGGTCACAGACCCCATCAATACAGGTACACTCGAGTAATGAAAAATCAAATGGTGATGAAAGGGTAGAAGAACATGAGGGTCCTGAAGTGGCAGCGGCTGGGAGTTCACAAAGCAGTCCTGGAATTGCCGTTGAACAAAGAGCGGCTGCTAAAATTCAGAAGGCATTTCGGTCTTACAGGGTATTTTTAATTTTTTGCCAAATTCCAATTTCATACATATTTCCAAGTGGACATTTGGGGTGGTTTTGCATATAA…	GbaIQD47	MGSGNWLRSFICLKKYKPNRSKQAKVLHVFCNDALIQHARVRHCISLIWSQTPSIQVHSSNEKSNGDERVEEHEGPEVAAAGSSQSSPGIAVEQRAAAKIQKAFRSYRARKAVRRLRDAGRFKNILIQGHTVKKQTTSTLSYLHSWCNVQSQIRARRICMVTEGRLKQKKMENQMKLEAKLHELEVEWCAGSETMEEILSRIQQREEAAVKRERAMAYAFSHQWRANASQYLGQASYGAGKENWGWSWIERWIAARPWEVRIHSQPIHPKKTHGRQASKSEKEMKVLASVKPCLPNGKVAPKAKNGAPSDG	GbaIQD47	ATGGGTTCAGGAAACTGGCTTAGATCATTCATTTGTTTAAAGAAATATAAACCAAACAGATCCAAACAAGCAAAGGTACTACATGTGTTTTGCAATGACGCATTAATCCAACATGCTCGTGTTAGACACTGCATATCACTAATATGGTCACAGACCCCATCAATACAGGTACACTCGAGTAATGAAAAATCAAATGGTGATGAAAGGGTAGAAGAACATGAGGGTCCTGAAGTGGCAGCGGCTGGGAGTTCACAAAGCAGTCCTGGAATTGCCGTTGAACAAAGAGCGGCTGCTAAAATTCAGAAGGCATTTCGGTCTTACAGGGCAAGAAAAGCAGTCCGCCGGCTGAGAGATGCGGGGAGATTCAAGAACATATTGATACAGGGACATACAGTGAAG…
GB_D01G1190	GB_D01G1190.1	GbaIQD48	ATGGGAAAATCCACTTCCTGTTTCAAACTCATCACTTGCGGCAGCGATTCCGCTGAAAAAGACGACGCCATTGATGCCCCTGAGGTAAATTACGGCTGAATTTCCCCCTTGTTTTTTGTTACTTTGCGTTGAATTAGTATTTCATGTGCTGTTTCGAATTGCATTTCACCTTTTAGTTTAATTTTTGGATTTGGTCGAGGAATGGGAGTTTGAAAACTTGCCTTACACCAGAATTTTAAGATCTGAGAAATCCTGCCTTAGCATTTTTTTATCAGCAATGTCTAAGCTGCCTTTTTTAACTCTGACTATTTTCCATAATTTTTGAAATGCAAATAGTTTTCTCGGTATCAAGTTTCGAATCTCTCAAAGTTTTTTAAACTTTATCTTCTTTTAACTGGT…	GbaIQD48	MGKSTSCFKLITCGSDSAEKDDAIDAPENKRSSDKKGWSFRKRSERHRVLSNSVIQVTTTTGLKESQDSVGFEFQQQDVSVASEKTSTVQYTEEKPQLMTPKEYIEEKSQLLALKEYTEEKSHSLTPIELAEEKSQLLAPIKCTEEKSQLTPEAEESKVPEPITATTNEAEDDFSLDESVVVIIQTAIRGFLAQKELGKLKNLVKLQAAVRGHLVRRHAVGTLRCVQAIVKMQLLVRARQSQEGSYVEKLDGKHQGVNQRLGNSATKKNLTYNSMEKLLSNRFAHQLMDSTPKTKTIHFKCDSSKPNSAWSWLERWMSVSSSEKASKAELPIEQPEQKKTEDCDSPRTPAVPSENISASNEPKPQVRETMVSSESEDNLITYDAANFKFEACQPSSSSV…	GbaIQD48	ATGGGAAAATCCACTTCCTGTTTCAAACTCATCACTTGCGGCAGCGATTCCGCTGAAAAAGACGACGCCATTGATGCCCCTGAGAATAAGAGATCAAGTGACAAAAAGGGATGGAGTTTTCGGAAGAGATCTGAACGGCATCGAGTGCTTAGCAACTCTGTGATACAAGTAACTACCACTACAGGACTTAAGGAAAGTCAAGACTCTGTTGGCTTTGAGTTTCAACAGCAAGATGTCTCGGTTGCTTCTGAGAAAACCTCCACTGTTCAGTACACTGAAGAGAAACCTCAGCTGATGACACCAAAAGAGTACATTGAAGAAAAATCCCAGTTGCTGGCACTAAAAGAGTACACAGAAGAAAAATCTCACTCGCTGACGCCTATAGAACTTGCTGAAGAA…
GB_D01G2509	GB_D01G2509.1	GbaIQD49	ATGGGAAAGAAAGTAAAATGGCTATCTTCTTTAAAGAAAGCCTTCAATCCAGAGTCAAAGGAAAAGAAAAACCAGGTTTGAAAAATTTCAATTCAGTCCATAATTCATGTTAAATTTCTGGTCAACCCACATGTACTTAATTTTAATGTTTTTTTGGGGGGTCAATTTGTGATTTTGATCCTTTTGTTATACTCAAATTTGAGATTTGTTTAATTTGGTATAAGGCGTCGATTATTTAGACTAATGAGATTATAAAAGGGTAAAGTACCTAGGAGGTCCCTGTATTATAGGGGCTGGATCAAATTCATCCCTCTATTATTAAATGAATTAATTGAGTCCCTATACTGTTAACAAATTGTAACAGAGTTAACATTTACTGTGTAAAAAATGTCTTAAAAA…	GbaIQD49	MGKKVKWLSSLKKAFNPESKEKKNQILDKQVHLGPSSSNAAAPTLETVNLSPPPQPEDEKIIKPETVAEATDDDVVVAPAVLTPAAVTVVQRRLNTDSRFAGKSMEEVAAIKIQTAFRVYMAKRALRALRGLVRLKSLMEGPAVKRQATSTLRCMQTLSRVQCQIRMRRIRMTEENQALQRQILQKHAKELVNLQMGEDWDDSLQSKEQIEASLLSKHEAAMRRERAMAYSFTHQQTWKNGSKSMNPLFMDMNNPTWGWSWLERWMAARPWEGRGVTGKEPNNDQSSVKNAHFEGEISKAYARYQLNLDNKQSPKSSQKPNRTSSHLSPSPKPPSIPSRKLKSASPSGSIIAPDDDTRSIVSVQSERNRRHSIAGSSVRDDESLASSPSLPSYMVPTKS…	GbaIQD49	ATGGGAAAGAAAGTAAAATGGCTATCTTCTTTAAAGAAAGCCTTCAATCCAGAGTCAAAGGAAAAGAAAAACCAGATTTTGGATAAGCAAGTGCATTTGGGTCCTAGTAGTTCTAATGCAGCTGCACCCACATTAGAAACTGTTAATTTGTCCCCTCCACCTCAGCCGGAAGATGAGAAAATAATCAAACCCGAGACGGTTGCTGAAGCTACCGATGATGATGTTGTTGTTGCTCCAGCTGTTCTGACCCCGGCTGCTGTTACGGTCGTTCAACGCCGACTTAATACAGATTCTCGGTTTGCTGGAAAATCTATGGAGGAAGTTGCAGCGATCAAAATTCAGACAGCTTTTCGAGTTTACATGGCGAAAAGAGCATTGCGTGCTTTACGAGGACTTGTG…
GB_D02G0111	GB_D02G0111.1	GbaIQD50	ATGGGAAAGAAAGGAAGTTGGTTTTCTGCAATCAAAAGAGTTTTCGTATCGAATTCGAAGGAGAAACTAAATATTGTAAGTCGGTATTTCGATGTTTTTAAGGTTGAAGTCGGTTTTGTTATGTATGTCACCTATTGAGATTTATGTCCTAATAGATTGTTATGCAGCATGTATGTCGTAAAATCGGAATTTTTACGGCTTGTTTTGTTTCGTTGAATCGTTTTAGGAATCGGATAAAAAGGGCGGTAAAGAAAGGAAGAAGAAAGGTCAAGCAAATTTCAAGCATGGAGAAGCTAATTCCTTCATTCCCCTGTTTAGGGAACCGAGTAGTATCGAGAAAATTCTTGGGGAGGCTGAAAGAGATCGGAAACTATCGTTCCGGCCTTCAACACCACCGGA…	GbaIQD50	MGKKGSWFSAIKRVFVSNSKEKLNIESDKKGGKERKKKGQANFKHGEANSFIPLFREPSSIEKILGEAERDRKLSFRPSTPPDLLRTPPFMLPRAASPRVRSQRIASPRAASPKTASSPRANSPRAASPFLPPPPRAASPRAGPPRLVRPRLEPTLRNHHASATKIQAAYRGYMARRSFRALKGLVRLQGVVRGHNVKRQTITAMKYMQLLVRVQSQIQSRRIQMLENQARRQAQFKKDKEAESGFGKWTFGQSETGNENWDDSLLTKEEMEARMQRKVEAVIKRERAMAYAYSHQLWKDAMKSPHTGVPNIRSGVFPWWWNWLERRLPPTDLPENQATKTFQFTPTMPNSELKPSPRPQSSQFTFDNIIDIPTPKSTRSTILPTTRPMQTPTPPSKLV…	GbaIQD50	ATGGGAAAGAAAGGAAGTTGGTTTTCTGCAATCAAAAGAGTTTTCGTATCGAATTCGAAGGAGAAACTAAATATTGAATCGGATAAAAAGGGCGGTAAAGAAAGGAAGAAGAAAGGTCAAGCAAATTTCAAGCATGGAGAAGCTAATTCCTTCATTCCCCTGTTTAGGGAACCGAGTAGTATCGAGAAAATTCTTGGGGAGGCTGAAAGAGATCGGAAACTATCGTTCCGGCCTTCAACACCACCGGATCTACTTAGAACACCACCTTTCATGCTTCCTAGAGCTGCGTCTCCTCGTGTTCGTTCTCAAAGGATTGCCTCTCCAAGGGCTGCTTCTCCGAAGACTGCTTCTTCTCCACGAGCCAATTCACCTAGAGCTGCTTCTCCGTTTCTGCCTCCA…
GB_D03G0044	GB_D03G0044.1	GbaIQD51	ATGGGCACTGCTAGAAACTGGTTCAACACAGTTAGAAAGAAGTTCATCAAATCATCCCACCAAAGAGATATCGTCATTCCTCATAGCGAAAATCTCAGCCAGCAGTCAATGATCAAAGAAGTTAGATACTTCCCCAATATTTCACCTTCATCGAGATCATCATTTCAGACAAAAAATTTAACCAGAGAGGATATTGCAGCAATTAAGATCCAATCAGTTTTCAGGGGTCATCTTGTAACTACAATAACTTATATTTCTTTTTCAAACACTTTAGATGTAAACTAACCATTTCGTGTTCTCTAATGATGAACAGGCAAGACGAGCATATAGAGCATTGAGAAGCCTGGTTAAGCTGCAAGCAGTGGCCCGAGGGGCGTATGTAAGGAAACAAGTACAAAT…	GbaIQD51	MGTARNWFNTVRKKFIKSSHQRDIVIPHSENLSQQSMIKEVRYFPNISPSSRSSFQTKNLTREDIAAIKIQSVFRGHLARRAYRALRSLVKLQAVARGAYVRKQVQIAMNCMHALVRLQVKVRARQLLGRYSE	GbaIQD51	ATGGGCACTGCTAGAAACTGGTTCAACACAGTTAGAAAGAAGTTCATCAAATCATCCCACCAAAGAGATATCGTCATTCCTCATAGCGAAAATCTCAGCCAGCAGTCAATGATCAAAGAAGTTAGATACTTCCCCAATATTTCACCTTCATCGAGATCATCATTTCAGACAAAAAATTTAACCAGAGAGGATATTGCAGCAATTAAGATCCAATCAGTTTTCAGGGGTCATCTTGCAAGACGAGCATATAGAGCATTGAGAAGCCTGGTTAAGCTGCAAGCAGTGGCCCGAGGGGCGTATGTAAGGAAACAAGTACAAATAGCAATGAATTGCATGCATGCACTTGTCAGGTTACAGGTCAAGGTTCGCGCCCGCCAACTCCTGGGCAGGTACAGTGAG…
GB_D03G0610	GB_D03G0610.1	GbaIQD52	ATGGGGAAGACTACAAGGTGGCTCAAGTCAGTTTTAGGCATGAAAAAGGAAAAAGAAAAAACCCCCATTCAGCATTCTGTTTTATACGACAAGAATGACAAGAAAAGGTGGAGTTTTGCCAAGTCCGGGAAAGATGTCGACGCAAATTCTCAAACCCCATCGGCCGTCACTGATGCCGCTTGGCTTAGGTCCTACTTTGCCGAAACCGAGAAAGTGCAGAACAAACATGCCGTTGCTGTGGCTGCTGCTACAGCAGCTGCAGCCGATGCAGCTATGGCAGCAGCACAAGCTGCCGTCGCAGTCGTCAGGCTGACCAGCAATGCTAGAAATTCTTTCTTGGCTGGAGGGAAGGAGAAGTGGGCAGCTGTTAAAATTCAAGCCGCCTTTAGAGGTTACTTG…	GbaIQD52	MGKTTRWLKSVLGMKKEKEKTPIQHSVLYDKNDKKRWSFAKSGKDVDANSQTPSAVTDAAWLRSYFAETEKVQNKHAVAVAAATAAAADAAMAAAQAAVAVVRLTSNARNSFLAGGKEKWAAVKIQAAFRGYLSRKALRALKGLVRLQALVRGYLVRKRAAATLHSMQALIRAQSTVRSQRMRRSFNKENRYHSENQPRKSIERFDEWRSEINAYDDNPKIVEIDTLKTRSRSHRFNTALSECGDDLPYQTISSPLPRLVPPRTSLPHYQNLNDFEWCFSGGDECRFATAHNTPRFGNAGRSNAPTTPTQSVCGDGYFRPYSNFPNYMTNTQSFKAKLRSYSAPKQRPESGGAKKRLSLNEIMAARNSISGVRMNKSYYQIHHQF	GbaIQD52	ATGGGGAAGACTACAAGGTGGCTCAAGTCAGTTTTAGGCATGAAAAAGGAAAAAGAAAAAACCCCCATTCAGCATTCTGTTTTATACGACAAGAATGACAAGAAAAGGTGGAGTTTTGCCAAGTCCGGGAAAGATGTCGACGCAAATTCTCAAACCCCATCGGCCGTCACTGATGCCGCTTGGCTTAGGTCCTACTTTGCCGAAACCGAGAAAGTGCAGAACAAACATGCCGTTGCTGTGGCTGCTGCTACAGCAGCTGCAGCCGATGCAGCTATGGCAGCAGCACAAGCTGCCGTCGCAGTCGTCAGGCTGACCAGCAATGCTAGAAATTCTTTCTTGGCTGGAGGGAAGGAGAAGTGGGCAGCTGTTAAAATTCAAGCCGCCTTTAGAGGTTACTTG…
GB_D03G1768	GB_D03G1768.1	GbaIQD53	ATGGGTAAAGCTTCCAAGTGGTTCCGCAGCATCCTCGGCTTCAAAAAATCCGACCCCCATAACCAACCTTCTCCTTCTTCTTCAAAACCAACTTCCCATAAAGACAAACGGCGTTGGAGTTTCGTCAAATCGTACCGTGAAAAAGACTCCTCCACGAACAATAGTAATGCGAAGTTGCCGTCGTCTTCGCAGCAACAGAAAGACTCTGTTTCCTTCGTTGAAAGGAAAGGTGACAATGAAGTAACGGATCCTAGCAAGCACGCCATCGCTGTTGCTGCCGCTACTGCCGCCGTTGCCGAAGCAGCCGTTGCGGCTGCTCAAGCTGCCGCTGCGGTGGTTAGGCTCACTAGTAACAGTGGTAGGTGCGCGCGTGAATCGGCAGCGGTTTACGTTTGCAAC…	GbaIQD53	MGKASKWFRSILGFKKSDPHNQPSPSSSKPTSHKDKRRWSFVKSYREKDSSTNNSNAKLPSSSQQQKDSVSFVERKGDNEVTDPSKHAIAVAAATAAVAEAAVAAAQAAAAVVRLTSNSGRCARESAAVYVCNNNSYIAHDESSAIKIQSAFRGYLARKALRALKGLVRLQALVRGHIERKRTAEWLRRMQALLRAQARARAGRAQISESSQSSCKSSHFHHPDPATPEKFEHVIRSKGTKYEQSSMLKRNGSKSSGRTVDNQEKLHSGWYRRVDEQTWEHSTRIGPNDDEKNDKILEVDTGKPNFISKRRNLFHSTHLSLNSDLYSCSFTNSRDSHQTAPSPSSGEVQSLTPLMLSHSEAIQESPFCGAVDDNSPQFYSASSKGASSKRSPFTPAKSD…	GbaIQD53	ATGGGTAAAGCTTCCAAGTGGTTCCGCAGCATCCTCGGCTTCAAAAAATCCGACCCCCATAACCAACCTTCTCCTTCTTCTTCAAAACCAACTTCCCATAAAGACAAACGGCGTTGGAGTTTCGTCAAATCGTACCGTGAAAAAGACTCCTCCACGAACAATAGTAATGCGAAGTTGCCGTCGTCTTCGCAGCAACAGAAAGACTCTGTTTCCTTCGTTGAAAGGAAAGGTGACAATGAAGTAACGGATCCTAGCAAGCACGCCATCGCTGTTGCTGCCGCTACTGCCGCCGTTGCCGAAGCAGCCGTTGCGGCTGCTCAAGCTGCCGCTGCGGTGGTTAGGCTCACTAGTAACAGTGGTAGGTGCGCGCGTGAATCGGCAGCGGTTTACGTTTGCAAC…
GB_D04G0096	GB_D04G0096.1	GbaIQD54	ATGGGTGCCTCAGGAAAATGGTTTAAATCGCTTATAACTTTCAAACCACTTCAAGATCCTACTAATCAAGTAACTTCACACTAGGTTTACCTCTTTTTTCTTTCTTCTTTTTATTTATGCTTTCATGGTTTCATTTTTCTGTTAATTGGGTTTGTAGGAGAAGGTGGGAGATAAGACGAAGAAGAAGTGGAGGCTATGGAGGAGCTCATCCGAAGGGTTGGGATCCATCTCATCAAAGGTTCCCAGGATGCACCACGTGGCTGCTTCAGAGGCCTCTGATTCATCTTTGTTGGTGGATGATGTGCTCGCTTCAGCTATGGCTACTGTTGCTCGTGCTCCACCCAAAGATTTCAGAGCTGTTAAGCGGGAATGGGCCGCCATTCGAATCCAGACCGCATT…	GbaIQD54	MGASGKWFKSLITFKPLQDPTNQEKVGDKTKKKWRLWRSSSEGLGSISSKVPRMHHVAASEASDSSLLVDDVLASAMATVARAPPKDFRAVKREWAAIRIQTAFRALLARRALRALKAVVRIQAIFRGRQVRKQAAVTLRCMQALVRVQARVRAQCVTSSEGQAMPKLMDEDPAKQAERGWCDSLGTLEELRAKQQMRQQGAIKRERAVAYSVLKQSRSCASPNARANKQPYSHNHQRLDRNSPDWNWLDRWMATKPWDTRAMEEGTEPAEMVMMMNTISRKSEDNNFSFHSSSYEHEPLKVKRNNVTTRILARPPTSMQTSGSLSAPSSESVYEETSTSTSSASPTTLSSNTPVAGTLEDNHAQKPSYMNPTESIKAKQKKAFRFSPDNVRRRHVVDD…	GbaIQD54	ATGGGTGCCTCAGGAAAATGGTTTAAATCGCTTATAACTTTCAAACCACTTCAAGATCCTACTAATCAAGAGAAGGTGGGAGATAAGACGAAGAAGAAGTGGAGGCTATGGAGGAGCTCATCCGAAGGGTTGGGATCCATCTCATCAAAGGTTCCCAGGATGCACCACGTGGCTGCTTCAGAGGCCTCTGATTCATCTTTGTTGGTGGATGATGTGCTCGCTTCAGCTATGGCTACTGTTGCTCGTGCTCCACCCAAAGATTTCAGAGCTGTTAAGCGGGAATGGGCCGCCATTCGAATCCAGACCGCATTTCGAGCCTTGCTGGCAAGACGAGCTCTAAGGGCGTTGAAAGCAGTAGTGAGGATTCAAGCTATATTCCGGGGTCGTCAAGTCCGAAAG…
GB_D04G0897	GB_D04G0897.1	GbaIQD55	ATGGGAAAAAAAGGTGGCTGGTTTTCTATTGTGAAGAAAGCTTTGAGCCCTGAATCCAAGAAATCTCAGGTTTCAATGATTTAATTCATAATCTAATGGATTTCTTTTTTCGGTTTGGGTTTTCTTAGATTTGTTGTTTTTAATTAATTTCAGCACCAAACTCCAAAGCCAAAGAAAAAATGGTTCGGAAAAAGCAAAGATTTGGGACCTGTGTCTGTGCCTGAAGAAACTGAAGTGATAACTGAAGATGTAAAGTTAAAAGAAGCTGAAAACGAACAAAGCAAACATGCCTACTCTGTGGCTCTTGCCACCGCTGTGGCGGCCGAGGCCGCGGTGGCAGCTGCTCAGGCGGCTGCTGAAGTTGTCCGTCTCACTTCTCAGCCGCGCCGTCTGGGGAAG…	GbaIQD55	MGKKGGWFSIVKKALSPESKKSQHQTPKPKKKWFGKSKDLGPVSVPEETEVITEDVKLKEAENEQSKHAYSVALATAVAAEAAVAAAQAAAEVVRLTSQPRRLGKSKEEIAAIRIQTAFRGYLARRALRALRGLVRLKSLIRGQSVKRQATTTLRCMQTLARLQSEISARRIRMSEENQALQRQLQQKCQKELEKLRAPMGEDWNDSTQSKEQIEARQQNKQEATMKRERALAYAYCHQRSWKNCSRSVNQTFMDPSNSHWGWSWLERWMAARPWEVRSTTDNNDRGSVKSMGARSISISEISRAYSRRDLNNDNKPSPTPQKSSRVPSHQSPSTPPSKAPSISSVSGKTRLPSPRGSQWGGYEDSRSILSTRSDRYRRHSIAGSSMRDDESLTSSPAV…	GbaIQD55	ATGGGAAAAAAAGGTGGCTGGTTTTCTATTGTGAAGAAAGCTTTGAGCCCTGAATCCAAGAAATCTCAGCACCAAACTCCAAAGCCAAAGAAAAAATGGTTCGGAAAAAGCAAAGATTTGGGACCTGTGTCTGTGCCTGAAGAAACTGAAGTGATAACTGAAGATGTAAAGTTAAAAGAAGCTGAAAACGAACAAAGCAAACATGCCTACTCTGTGGCTCTTGCCACCGCTGTGGCGGCCGAGGCCGCGGTGGCAGCTGCTCAGGCGGCTGCTGAAGTTGTCCGTCTCACTTCTCAGCCGCGCCGTCTGGGGAAGTCAAAGGAGGAAATAGCTGCTATCAGGATTCAAACAGCATTTCGTGGATATTTGGCTAGGAGGGCACTGCGAGCTTTGAGAGGG…
GB_D04G1357	GB_D04G1357.1	GbaIQD56	ATGGGAAAGAAAGGGAAATGGTTGTCCTCTCTAAAGAAAGCCTTCTTCTCAGAGTCCAAGGGAAAGAAAAACCAGGTTAGGATAAGTCTCGTTCAGCTAAAAATCATATGTAGTTTCATGGTTAGCTCTGTTTTTAATATTCTTGATTACTATGTTTCTCAGAAATCAAAAGAACAATTTTTGGAGAAGGTGCATTTGGATCCCACTGGTTCTGATGCAGCCAAGTTATCCCCACTTCCTCAGCCTGAAGAGGTGAAATTAATTGAACCTGAAGTTGAGCAAAGCAAGCAGACTTACCCTGTGGCAGTTGCCAATTCTCCTGCCGTTCCAGCTCAGGTTGCTCTACAGGCCATTCGACATCAACTTAATACAGATGCTAGGTTTGCCGGAAAATCTAAG…	GbaIQD56	MGKKGKWLSSLKKAFFSESKGKKNQKSKEQFLEKVHLDPTGSDAAKLSPLPQPEEVKLIEPEVEQSKQTYPVAVANSPAVPAQVALQAIRHQLNTDARFAGKSKEEVAAIKIQAAFRAYLAKRALRALRGLARLKSLMEGPAARRQAAGSLRCLQTLSRMQCQIHARRTRMMEENQALQRQLLQKHAKEIVNLQMGEDWDDTVRSKEQIEASLLSKHEAAMRRERAMAYSFTHQQTWKNASRSMNPLFMDPSNPSWGWSWMERWMTARPWEVRGGMRDKEHLDDQSSLKSARSNFGGEISKAYARYQLNLDKQSTKANQKPSRTSSLLSPSTPKSASIPARKLKSASPRSGVAGLDDETRSIVSMKSDRNRRHSIAGSSVRDNESLANSPSLPSYMVPT…	GbaIQD56	ATGGGAAAGAAAGGGAAATGGTTGTCCTCTCTAAAGAAAGCCTTCTTCTCAGAGTCCAAGGGAAAGAAAAACCAGAAATCAAAAGAACAATTTTTGGAGAAGGTGCATTTGGATCCCACTGGTTCTGATGCAGCCAAGTTATCCCCACTTCCTCAGCCTGAAGAGGTGAAATTAATTGAACCTGAAGTTGAGCAAAGCAAGCAGACTTACCCTGTGGCAGTTGCCAATTCTCCTGCCGTTCCAGCTCAGGTTGCTCTACAGGCCATTCGACATCAACTTAATACAGATGCTAGGTTTGCCGGAAAATCTAAGGAGGAAGTGGCGGCAATCAAAATTCAAGCAGCTTTCCGAGCTTACCTTGCAAAAAGGGCATTGCGTGCTTTAAGAGGACTGGCTAGG…
GB_D05G0271	GB_D05G0271.1	GbaIQD57	ATGGGGAGAGCTTCAAGGTGGCTAAAGAGCTTGTTTGGGATAAAGAACAGTAAAAACAGCTTCAATCCCAGAGACGGGAAAGACAAGAAAAACTGCGGCATTGAACATTCAGTGGGAGATTCAAGCATTTCCCCAGAAAAGGTTGCGTGGTTAAGATCGTGCTATAATGAAACAGAGAGGGAGCAGAACAAGCACGCCATTGCTGTGGCTGCCGCCACTGCTGCTGCGGCGGATGCAGCAGTAGCCGCCGCGCAGGCTGCAGTGGCGGTGGTGAGACTGACTAGTCATGGTAGAGGGACCATGTTTGGTGGTGTACATGAGAAGTGGGCTGCTGTCAAGATTCAAACAGTTTTTAGAGGTTATCTGGTAAGTAAGTGGAGTTTTTATTTCTTAATTTAT…	GbaIQD57	MGRASRWLKSLFGIKNSKNSFNPRDGKDKKNCGIEHSVGDSSISPEKVAWLRSCYNETEREQNKHAIAVAAATAAAADAAVAAAQAAVAVVRLTSHGRGTMFGGVHEKWAAVKIQTVFRGYLARKALRALKGLVKIQALVRGYLVRKQASATFHSMQALMRAQATIKSQKARAIINNDAIRFDIRARKSMERFDDTRSEHTVSIHSRRLSASLDIDESPKIVEVDTGIKPRARSRRTNTSISDFIDDHTYQTLPSPLPCRCPARLSIPDSRHYQDIDWGFSGDECRFSTAHSTPRFINSCAPATPAKSVSGHNFFRPCGDSPNYMANTQSFKAKLRSHSAPKQRPEPGPKRRLSLNEMMESRSSLSGVKMQRSCSRAQEAIHFKNAVMGKLDRSLEFGK…	GbaIQD57	ATGGGGAGAGCTTCAAGGTGGCTAAAGAGCTTGTTTGGGATAAAGAACAGTAAAAACAGCTTCAATCCCAGAGACGGGAAAGACAAGAAAAACTGCGGCATTGAACATTCAGTGGGAGATTCAAGCATTTCCCCAGAAAAGGTTGCGTGGTTAAGATCGTGCTATAATGAAACAGAGAGGGAGCAGAACAAGCACGCCATTGCTGTGGCTGCCGCCACTGCTGCTGCGGCGGATGCAGCAGTAGCCGCCGCGCAGGCTGCAGTGGCGGTGGTGAGACTGACTAGTCATGGTAGAGGGACCATGTTTGGTGGTGTACATGAGAAGTGGGCTGCTGTCAAGATTCAAACAGTTTTTAGAGGTTATCTGGCTCGAAAAGCATTACGAGCTTTGAAAGGATTG…
GB_D05G0781	GB_D05G0781.1	GbaIQD58	ATGGGTGTCTCAGGAAAATGGATCAAAGCACTAGTGGGCTTGAAGAAATCAGAAAAGTCTCAATCTTCAGAGAAAGTAGAAAATGTTAGTTTGAATGTTGCGGTTTTTTTTGGCTTCATGCTTGTGTCACAACCCACACACAATATCCAGGCCTGTGACATGTACATCATGGCATGTGTGCCTCTTCAAAATGCTGAAGTATTATCAAATGTCAGAAAGCATCTTCTATGCACACTTGTAGTTAGATGATCATGTTTTTGGAGTAATGCATTTTTCATTGACTTAGGGCTTAGTTGAGTTGTTGACTAATGTGGTACATACAAGGAGTATTATGTAGTAACTTACATGCAGTAGCTTTCCTTGTTAGCCTAATCAAATTGTGATTTCTACTCTCTTCAT…	GbaIQD58	MGVSGKWIKALVGLKKSEKSQSSEKVENRATGSKFRHRRKQLVEFDTNELQEELDENAASLAENATTRATIDAAGSPSDAFEVHDAPLNEHAREEWAATRIQTAFRGFLARRALRALKGLVRLQALVRGHAVRKQAAITLRCMQALVRVQARVRARRVRLALENQTAQQKLQQQLANEAHVKEIEEGWCDSIGSVEEIQAKLLKRQEAAAKRERAMAYALAHQWQAGSRQQSVPAGFEPDKSSWGWNWLERWMAVRPWENRFLDINLRDGVKIREDSPAEGKNGASSQIKPAMRKPAASSLHANLSNKKTGPSHFDGSDSPPGKSACVLEAVNAPSSKPKSKPNHEDSVEEADSRPVISSRSHSNPKERLTQSDKQAKRRLSMPNTGGGIVSQTTKLSK…	GbaIQD58	ATGGGTGTCTCAGGAAAATGGATCAAAGCACTAGTGGGCTTGAAGAAATCAGAAAAGTCTCAATCTTCAGAGAAAGTAGAAAATAGAGCAACTGGTAGCAAATTTCGTCACCGAAGAAAGCAGTTGGTTGAGTTTGATACTAATGAACTTCAAGAAGAGTTGGATGAGAATGCTGCTTCACTAGCTGAAAATGCTACTACTCGTGCAACTATAGATGCTGCTGGCTCTCCTTCTGATGCCTTTGAAGTGCATGATGCACCTCTTAATGAACATGCTAGGGAAGAATGGGCTGCCACGAGGATACAAACTGCTTTCCGAGGATTTCTGGCCAGAAGAGCACTGCGAGCATTAAAAGGATTGGTAAGACTGCAGGCCCTTGTCAGGGGTCATGCTGTAAGA…
GB_D05G1350	GB_D05G1350.1	GbaIQD59	ATGGGGAAAGCTGCAAGGTGGCTGAAGGGGTTATTGGGCATGAAAAAGGAGAAAGATAAAGACCGGATAGAGCAATATTCATCTGTTTTATCCGATCAGAAGGAGAGGAAAAGATTTAGTTTTGGCAAATCCAGCAAAGGTGTCAGTGAAATTTCTCAGAGTCCAAGCAATGTTTCCACCACTACAGATGCTGCTTGGCTCAGATCCTACATTGCTGAAACTGAGAAAGACCAAAACAAGCATGCAATTGCAGTGGCTGCTGCCACCGCAGCTGCAGCTGATGCCGCCGTGGCTGCAGCAAAGGCGGCAATGGCAGTGGTGAAGCTAACCAGTAATGGACGAACCAGTTTGGTTGGTGGAGGGAGGGAAAGGTGGGCAGCTGTGAAAATTCAAAGCGTC…	GbaIQD59	MGKAARWLKGLLGMKKEKDKDRIEQYSSVLSDQKERKRFSFGKSSKGVSEISQSPSNVSTTTDAAWLRSYIAETEKDQNKHAIAVAAATAAAADAAVAAAKAAMAVVKLTSNGRTSLVGGGRERWAAVKIQSVFRGYLSRKALRALKGLVRLQALVRGYLVRKRTIATLHSMQALLRAQTTVRSQRIRRSFNRDHSCCLENKPRSSIERFDEPRSVIHSKRLSASMETNAHDDSPKIVEIDTFKTRSRSRRFNLNALSECGDDFASHTTSSPLLCPVPARTSTPHHQNVDDFEWCFADDECRLSTAQSTPRFANPVRTPIAPATPLSVCGERYFRRPHSNLPNYMAKTQSFKAKLRSHSAPKQRPEPGAKKRLSLNGLMAARNSISGVRMNTSCYQVDE…	GbaIQD59	ATGGGGAAAGCTGCAAGGTGGCTGAAGGGGTTATTGGGCATGAAAAAGGAGAAAGATAAAGACCGGATAGAGCAATATTCATCTGTTTTATCCGATCAGAAGGAGAGGAAAAGATTTAGTTTTGGCAAATCCAGCAAAGGTGTCAGTGAAATTTCTCAGAGTCCAAGCAATGTTTCCACCACTACAGATGCTGCTTGGCTCAGATCCTACATTGCTGAAACTGAGAAAGACCAAAACAAGCATGCAATTGCAGTGGCTGCTGCCACCGCAGCTGCAGCTGATGCCGCCGTGGCTGCAGCAAAGGCGGCAATGGCAGTGGTGAAGCTAACCAGTAATGGACGAACCAGTTTGGTTGGTGGAGGGAGGGAAAGGTGGGCAGCTGTGAAAATTCAAAGCGTC…
GB_D05G1394	GB_D05G1394.1	GbaIQD60	ATGGGTGCCTCAGGAAAATGGTTTAGATCACTTGTAACTTTGAAACCACTTCATGAACCCATTAACCATGTATTTTTCTTCAATCCCATAACTAAGTTTCTAATTTTCTGGAACTCTTTTTTTTCCTTCGTGCTTTCAGTGTTTTTATTTTTCATAATTTTTTTTGTAGGAGAAAATGGGAGATAATAAGTCCAAGAAGAAGTGGAAACTATGGAGGAGCTCATCAGAAGGGTTCGGATCCTCCTCATCCAAGAGTTTCAAAATGCGGCACGTGGTAGCTGCCCCACTGGCCTCCGATTCTTCTTTCATGGCTGATGATCTGCTTGCTGCTGCCATGGCTACCATTGTTCGTGCTCAACCCAAAGATTTCAGAGCTGTGAAGCGTGAATGGGCCGCCAT…	GbaIQD60	MGASGKWFRSLVTLKPLHEPINHEKMGDNKSKKKWKLWRSSSEGFGSSSSKSFKMRHVVAAPLASDSSFMADDLLAAAMATIVRAQPKDFRAVKREWAAIRIQTAFRGLLARRALRALKAVVRIQAIFRGRLVRKQAAVTLRCMQALVRVQARVRAQCLASSEEQSLHKLDDPTKEAEKGWCDIPGTLEEVKAKQQMRQQGAKKRERAMAYSVSRSYGNGSPNFRANKQQPLSRRHHQRLHRDSPDWDWLDRWMSTKPWETRTIEEPDSTVSRKSEDNIVSFHSTSSEQRDSLKLKTKNPKTSILTRPANQTSCSSSAPSSESVNDKSSTSTSSASVSPTTLSSNTIVVGTLNNSNHTQKPSYMNPTESIKAKQKTFKFSSSDNMRRHVVDDDDDDDLQ…	GbaIQD60	ATGGGTGCCTCAGGAAAATGGTTTAGATCACTTGTAACTTTGAAACCACTTCATGAACCCATTAACCATGAGAAAATGGGAGATAATAAGTCCAAGAAGAAGTGGAAACTATGGAGGAGCTCATCAGAAGGGTTCGGATCCTCCTCATCCAAGAGTTTCAAAATGCGGCACGTGGTAGCTGCCCCACTGGCCTCCGATTCTTCTTTCATGGCTGATGATCTGCTTGCTGCTGCCATGGCTACCATTGTTCGTGCTCAACCCAAAGATTTCAGAGCTGTGAAGCGTGAATGGGCCGCCATTCGAATTCAGACTGCATTTCGCGGTTTGCTGGCAAGACGAGCTCTGAGGGCATTGAAAGCAGTAGTAAGGATTCAAGCCATATTCCGTGGTCGTCTAGTC…
GB_D05G1620	GB_D05G1620.1	GbaIQD61	ATGGGTTCTGGAAACTTGTTCAAGTCAATAATAAATATAGTGAAAGATGACAACTCAAAGAAAGTAAAGGTATATTCTCAAACAGTCATAAACTAAGCTATGCAAGTCTCTACATTCCAGTTATAAATAAACCTAAGATTGCTTCTCTAGTCATTGATTTGCAATTTGAATCCTTGGGTTAATATTATCTATGATCTCATCTGTTTGGCACAGGGGTCTTCTGCTTCTGAAAAATCCAGTGGCTTCAAATGGAAGAAACACCAGCAAAAGGCATCCACTAGACCAGGTCTAATTAGTGGAAATTCTAATACTCTTGGCATGCCAATTGAGGACTTGGCAGCTACTAGGATTCAAACTGCATTCAGGGCCTATAGAGTATGTTGGTTTGGAGGTTCTACA…	GbaIQD61	MGSGNLFKSIINIVKDDNSKKVKGSSASEKSSGFKWKKHQQKASTRPGLISGNSNTLGMPIEDLAATRIQTAFRAYRARKQLRRLKGIVRLQAQTLNSSIKKQATTTLNYLHSWSIIQAQIRARRLCMVTEGHLRQKKIANQIKLEAKLHDIEVEWSCGPETMEEILTKIHHREEAAVKRERTMAYAFSHQWRASNSDNNGIGNYELAKANWGWSWVERWIAVRPWESRLPAQSITPKKPLNRQINKASKNSSSPKPKPKPHFSNEKETMKMKPRRLSYPGAEKPTARQQSTKAEEENNKKGERVV	GbaIQD61	ATGGGTTCTGGAAACTTGTTCAAGTCAATAATAAATATAGTGAAAGATGACAACTCAAAGAAAGTAAAGGGGTCTTCTGCTTCTGAAAAATCCAGTGGCTTCAAATGGAAGAAACACCAGCAAAAGGCATCCACTAGACCAGGTCTAATTAGTGGAAATTCTAATACTCTTGGCATGCCAATTGAGGACTTGGCAGCTACTAGGATTCAAACTGCATTCAGGGCCTATAGAGCTCGAAAACAATTACGTCGATTGAAAGGTATTGTAAGATTGCAGGCTCAAACCCTAAATAGTTCCATCAAAAAGCAAGCTACAACAACATTAAATTATCTTCACTCGTGGAGCATCATACAGGCTCAAATAAGAGCTCGTCGACTCTGTATGGTAACAGAAGGCCAT…
GB_D05G1930	GB_D05G1930.1	GbaIQD62	ATGGGAAAATCCACTTCCTGTTTCAAAATCATCACTTGCGGCGGCGATTTTGCTGAGAACAACGACGTTATTCATGTTCCTGAGCCTGAGGTATATATATAAATATCCTTTTCGCCTTTACGGCTGCCGTTATTTTTTTCGTTGTTGTTTTGCGTTGGATTAGGATTTCACCTTCCGACTTTGCATTTGAGGTTTCAGTTCGAAACAGTCAGTGCATTGTTTAATTTATGGATTTACTTGAGGAACCGGAGTTTAAACTTGCCTTACTCCACTACTTTAAGATCTGACTACTCTTGGCTTCGCATTTTTATCAGCAATGTCCAAGCTGCCTTTTAAATCCAATTACTTTCACAACTTATATAATGCAAATGTTTTTTAGTTTCTGGTTTCAAATATAGC…	GbaIQD62	MGKSTSCFKIITCGGDFAENNDVIHVPEPEIKKSNDKKGWSFRKRSERHRVLSNTVIQEATSGLKESPESSGFNFQQPDASIIPEETSTIEYSEEKPQAPTPKEHIEEESKCVASKGYTEEKSQLLIPEDSKVPEPVATATNEAEDDANLGESVVVIIQTAIRGFLAHKELGKLKNLVKLQAAVRGHLVRRHALGTLRCIQAIVKMQVLVRARLSQEGPYDEKKRDGKHCGENQSLERSAIKQNATYTSIENLLSNRFARKLMDSTQKTKPIRIKCDPSKPNSAWSWLERWMSVSLSKRPSTTELSIEQPEREKSDNCDFQVTTTVPESFPESNEPKLYVRETLVSSESEENLIAHDAANSKFEACQTTSSTVMDDLEQPQIDNSTSDIKEGEENLITY…	GbaIQD62	ATGGGAAAATCCACTTCCTGTTTCAAAATCATCACTTGCGGCGGCGATTTTGCTGAGAACAACGACGTTATTCATGTTCCTGAGCCTGAGATTAAGAAATCAAATGACAAAAAGGGATGGAGTTTTAGAAAGAGATCTGAACGGCATCGGGTGCTTAGCAACACTGTTATACAAGAAGCTACTTCTGGACTTAAGGAAAGTCCAGAATCTTCCGGTTTTAATTTTCAACAGCCTGATGCATCCATTATTCCTGAGGAAACCTCCACCATTGAATACAGTGAAGAGAAACCTCAGGCTCCGACACCAAAGGAGCACATTGAAGAAGAATCTAAGTGTGTGGCATCAAAAGGATACACTGAAGAAAAATCTCAGTTGTTGATTCCGGAGGACTCAAAAGTT…
GB_D05G3034	GB_D05G3034.1	GbaIQD63	ATGGGCAAAAAAAGCGATTGGTTTTGGTTTGTGAAGAAAGCTTTGACCCCTGAGTCCAAGAAAGATCAGGTAAAAGTTTGCACAATTTAAGATTTTTTATAATTAAAAAAATTATTTATGAAAATGAATCGTTTTGAATAATATAATACAACATCATCGATTTATTGGACAATATAACCTATAAAAAGGGGTGAGGCCAAAATGTCAATGCAACATCCTTTTTCACTCAACTTTTACTCTTTTTAAAAATGGTATATAGTTTAGTTTTATAATTTTATAGTTATAGGTGTGGTATAATTTTGAATTCTATACATCTATTTTACGAAAACTAGAAGTTAATTTATTTATTTTAATTTTTCATATTTTGATTTTTGCATGTTTTGGAATTTAGAAAATTAA…	GbaIQD63	MGKKSDWFWFVKKALTPESKKDQKESSKSKKKWQSKTKDSEPAVPLPQETETETKTEEPEPPPSEDAKPAEAENEPKRHTHFIALATAMAAAAAVAASKATAEAVRVASLQRISSERTAATKIQTAFRGYLARKALPELRRSERLKSMIEGQSVKEQAKSALRCMQTMGGVQSRIRGMRLRMLEENQILHHHLQQKRHKELDKFNASMGGEWHDGRKSKEQSEAIKQYKQEAAMRRERALAYAFTRQRSWKVSSKAANQTLMDQNTPHWGWSWLERWMAARPWDIPCSSPNSASVNTLVSPSISNNDNKPSPTPSKPTPPPPSKIPSFSSLSSQIRQPSPRGTPPGGVECSTPDRDRRRQSSIGGFSSAKDDKSVGSSAEKAPSWMKQVRASQLSRSLK…	GbaIQD63	ATGGGCAAAAAAAGCGATTGGTTTTGGTTTGTGAAGAAAGCTTTGACCCCTGAGTCCAAGAAAGATCAGAAGGAAAGTTCAAAATCAAAGAAAAAATGGCAAAGCAAAACCAAGGATTCGGAGCCTGCAGTTCCTTTGCCTCAAGAAACTGAAACGGAAACAAAAACTGAAGAGCCTGAACCTCCTCCCTCTGAAGATGCCAAACCAGCGGAAGCTGAAAATGAGCCTAAAAGACACACCCACTTCATCGCTCTTGCCACCGCTATGGCTGCTGCCGCCGCGGTCGCAGCTTCTAAGGCGACTGCTGAGGCTGTTCGCGTCGCTTCTTTACAACGCATATCGTCGGAGAGAACGGCTGCTACCAAGATTCAAACTGCATTTCGCGGATACTTGGCTCGG…
GB_D06G0054	GB_D06G0054.1	GbaIQD64	ATGGGAAGATCCATTTCCTGTTTCAAAATCATCACTTGCGGCACTGATTCAGCTGATAAAAACGACGACGTTATCGATGTTCCTCAGGTATATGTGTTATCCTTTTAGCCTTTACGGCGGCTGTTCGTTGGATTTAAGATTTCATGTTTTTTTTTTTGTAATTGATGTTTTTAGTTGCTTTAATTGAAGTTTTCAGAGGAATCGAAGCTTTAGAGCTTGACATCTTTCATTATTTTGAGATCCGATTGCTTCCACAGTTTATGAATTGAATTTGTTTATTTTCAGCTTCAGTTTCCAAATCTAGCAAGTTTTTTAAGGTCAAATTGTATAGAATGTCTCTGTACCATGTGGTTTTTATGGATTTAGTCCCTATAATATAATTTGATCATTTCTCGGCTA…	GbaIQD64	MGRSISCFKIITCGTDSADKNDDVIDVPQDKRSSDKKGWSFRKRSERHRVLSNTVVQEASTGLEESPETASYVQQSDVSVAPEKTSTVQYTEEKLQSVAPKDYVEEKSQLSTQEDLKVPEPVVAATNEAKDDSNVDESVVVVVQTAIRGFLARKELGKLKNLVKLQAALRGHLVRRHAVGTLRCIQAIVKMQMLVRARHARLSQEGSYSEKNAASTSIEKLLSNRFARQLLDSMPKTKPIRINCDPSKPSPGWSWLERWMSTSSSEKTSMAELPNEQPRDSPLDATVPSKAISESNDVNKILVSSESEENLITYVAADSKSKACLPTSSVTGDLERTQIDNMSTSDLKETSLDQTIETEAHCLDVGVESLDAVLSGADTISRSKEPSITENPVLHDRKG…	GbaIQD64	ATGGGAAGATCCATTTCCTGTTTCAAAATCATCACTTGCGGCACTGATTCAGCTGATAAAAACGACGACGTTATCGATGTTCCTCAGGACAAGAGATCGAGTGACAAAAAGGGATGGAGTTTCCGGAAGAGATCTGAACGGCATCGGGTGCTTAGCAACACTGTGGTACAAGAAGCTTCTACTGGACTGGAGGAAAGTCCTGAAACTGCTAGTTATGTTCAACAGTCTGATGTCTCCGTTGCTCCTGAGAAAACCTCCACCGTTCAGTACACCGAAGAGAAACTTCAGTCAGTGGCACCAAAAGATTACGTTGAAGAAAAATCTCAATTATCGACCCAAGAGGACTTGAAAGTGCCCGAACCTGTTGTTGCTGCCACGAATGAGGCTAAAGATGATTCT…
GB_D06G1941	GB_D06G1941.1	GbaIQD65	ATGGCTAAGAAAAAGAGCTGGTTCAGTCTAGTGAAGAAGTTTTTTCTCTTTGAGACAATTGCAAGAACAGAGAAGGTAACTTTTTTTTTTTTTTGCTATTTACTGCTGTTTCCCAGTTTTTATTTTTATTTTTGCTTTATCCTTTATGAATGGATGTTATCTATTTGTCAGAAGGAGAAAAAAAGGAAATGGATGTTTGGAAGGTTAAGGACCAAGAGGTTGACAGCACCACCAAACGACGTGACAAAGGATGAGCATGTAACTGTGGCTATTGCCACACCTGCTGCCGCCGAAGCAGGTGTTGCAGCCGCTCAGGTTGCGGCCGAGGCTGTTCCACCCTATGGTACCCTTCATTCTAACCATATATGTGATGGAGAAACAGATGAACGAGCCCTGGAT…	GbaIQD65	MAKKKSWFSLVKKFFLFETIARTEKKEKKRKWMFGRLRTKRLTAPPNDVTKDEHVTVAIATPAAAEAGVAAAQVAAEAVPPYGTLHSNHICDGETDERALDVQELAATKIQATFRGYLARKALRALKGIVRLQAIIRGSAVRRQAMNTLKCLQSIVNIQSQVSAMRFQMAEGTWQYDETKQLVTLEDKIIKVDINSQRRWDDSILTKEEAEAMVLSRKEAAIKRERIKEYSYVHRKSAESELNKGNGRLKYWLDEWVDTQVTKSKELEDLDSVWTSNRKPMEENRAKHLRLKTSPRPYHYNSEGLESPVVPVPRRSFHKKQCSLGEDNSFPTSPVVPPYMAATQSARAKVRSLSSPKVRPGSFETQSESYSPYKNKLCLISSITSEVPSSYKMNGSRSS…	GbaIQD65	ATGGCTAAGAAAAAGAGCTGGTTCAGTCTAGTGAAGAAGTTTTTTCTCTTTGAGACAATTGCAAGAACAGAGAAGAAGGAGAAAAAAAGGAAATGGATGTTTGGAAGGTTAAGGACCAAGAGGTTGACAGCACCACCAAACGACGTGACAAAGGATGAGCATGTAACTGTGGCTATTGCCACACCTGCTGCCGCCGAAGCAGGTGTTGCAGCCGCTCAGGTTGCGGCCGAGGCTGTTCCACCCTATGGTACCCTTCATTCTAACCATATATGTGATGGAGAAACAGATGAACGAGCCCTGGATGTTCAAGAACTTGCTGCCACAAAAATCCAAGCTACCTTTCGGGGATACCTGGCAAGGAAAGCTTTGCGGGCGCTGAAGGGGATAGTGAGGCTTCAA…
GB_D06G2053	GB_D06G2053.1	GbaIQD66	ATGGGCAAAAAAGGAAGCTGGTTTACTGCTGTGAAGAAAGTTCTAAGCCTTGAACCCAACAAAGATGAGGTTTCATTTTCAATTATTTTATTTCATAATCTAATTGTTTTTTATTTAATTTTTTGTATTTTTTTTATTTCACCAGAAGATTCAAAAATCCAAGAAAAATGGGGTTAAATTACCTGAGAAGATCAAAGGAAGCAAACGTGACAACTGGTTCGCTCCGGCCACCACCATGGTGACCGGCGCGTTGGTTCGCCTTACTTTGTCGCCACACTACTTGGGAAAATCAATGGAGGAAATAGCTACTGTTAAGATTCAAACTGTTTTTCGAGGATACCTGGTATCAAATTTCTTCCCCCATTTCTTTAATTTGAAATTTCTTATATTAAGTAATTT…	GbaIQD66	MGKKGSWFTAVKKVLSLEPNKDEKIQKSKKNGVKLPEKIKGSKRDNWFAPATTMVTGALVRLTLSPHYLGKSMEEIATVKIQTVFRGYLARKALRDLRGLERLKSLIQGQSVKRQATITLRCMRTLARVQSQTRTRQLRVSEQNRALQKHLQTKYEKQLQNSKSYMGEDWNVSTKSKEQMQAKQQYRQVAAMRRERALAYSFTHQRSWKVTCRSMNHTSMDPFNPKWSWSWLERWMSTRPWEIQNAPDNNDHGPSKSVGAEITKAKSQSDVNNDHNKQSSTPAKPIRPPNRRSSSTPPSKTHSISSKKGLESPSPTRIQLPDCYKRHSIGGLSLERDDEVFANSPPNNKIPARSSSKDRSRPPSINRNPVNTRRHSGPPKVDIFSN	GbaIQD66	ATGGGCAAAAAAGGAAGCTGGTTTACTGCTGTGAAGAAAGTTCTAAGCCTTGAACCCAACAAAGATGAGAAGATTCAAAAATCCAAGAAAAATGGGGTTAAATTACCTGAGAAGATCAAAGGAAGCAAACGTGACAACTGGTTCGCTCCGGCCACCACCATGGTGACCGGCGCGTTGGTTCGCCTTACTTTGTCGCCACACTACTTGGGAAAATCAATGGAGGAAATAGCTACTGTTAAGATTCAAACTGTTTTTCGAGGATACCTGGCGAGGAAGGCATTGCGAGATTTGAGAGGGTTAGAGAGGTTGAAATCATTGATACAAGGGCAATCCGTGAAACGACAAGCCACTATTACGTTACGATGCATGCGGACACTTGCTCGAGTGCAGTCCCAAACT…
GB_D07G0093	GB_D07G0093.1	GbaIQD67	ATGGGAAAAGCTACAAGGTGGCTAAAGAGCTTATTTGGGATAAAGAACACCAAAGAATGCCCAAGTTCCGGTGACCGGAAAGATAAGAAACGGTGTAGCATTGGCCATTCAGGGCGGGAATCAAGCGGCGGATTATGTCACAACCCTACAACGAAACCACCAAATATATCACCGGCAGAGGTGGTTTGGCTGAGATCATTCTACAATGAAACGGAGAAAGAGCAGAATAAGCACGCAATTGCGGTGGCAGCTGCCACGGCTGCTGCTGCAGATGCCGCTGTCGCCGCCGCTCAGGCAGCTGTGGCGGTGGTGAGGCTTACGAGTCATGGAAGAGGTACCATGTTCGGCGGTGGTGGACATGGAAAGTGGGCTGCCATTAAGATTCAATCCGTTTTCAGA…	GbaIQD67	MGKATRWLKSLFGIKNTKECPSSGDRKDKKRCSIGHSGRESSGGLCHNPTTKPPNISPAEVVWLRSFYNETEKEQNKHAIAVAAATAAAADAAVAAAQAAVAVVRLTSHGRGTMFGGGGHGKWAAIKIQSVFRGYLAKKALRALKGLVKIQALVRGYLVRKQASATLHGMQALIRAQATIRSQKARKSMEKFDDTRSERTVSFHSRRLSASLDTLNIEESPKIVEIDTGRPKSRSRRTNTSVSDFGDDPSFQILSSSVPARVPARLSVPDSHTDWGLTGDECRFSTAQSTPRFINCFVSNAPVTPAKSVCADNFFRHYGIGNLNFPNYMANTQSFKAKLRSHSAPKQRPEPGPKKRLSLVETTESRSSLSGVRMQRSCSQAQEAISFKNVVMGKLDRYS…	GbaIQD67	ATGGGAAAAGCTACAAGGTGGCTAAAGAGCTTATTTGGGATAAAGAACACCAAAGAATGCCCAAGTTCCGGTGACCGGAAAGATAAGAAACGGTGTAGCATTGGCCATTCAGGGCGGGAATCAAGCGGCGGATTATGTCACAACCCTACAACGAAACCACCAAATATATCACCGGCAGAGGTGGTTTGGCTGAGATCATTCTACAATGAAACGGAGAAAGAGCAGAATAAGCACGCAATTGCGGTGGCAGCTGCCACGGCTGCTGCTGCAGATGCCGCTGTCGCCGCCGCTCAGGCAGCTGTGGCGGTGGTGAGGCTTACGAGTCATGGAAGAGGTACCATGTTCGGCGGTGGTGGACATGGAAAGTGGGCTGCCATTAAGATTCAATCCGTTTTCAGA…
GB_D07G0225	GB_D07G0225.1	GbaIQD68	ATGGGTGCTTCAGCGAAATGGGTGAAATCTCTTATTGGTCTCAAGAAAACTGTAAAAGATGACAAAGTAAGCTCTACTCTTTTTTGTGGTTCATCTCAAAGTTACCTTACTGTTATATAGAATTAATCACCAAAGTGTTTTTTTTTTGTAGGAAAAGATGAGTGGCAAGAGCAAGAAATGGAAGCTATGGAGGAGTTCTTCAGGGGATGGAATAGGTTCCTCATGGAAGGGTTTTAAAGGAAAGTTTAAAGCAGATTACGAAGGATCTGATTCTTCACCAAGGTCTGAAGCTTTCTCTGCTGCCATGACTGCTGTGGTTCGAGCTCCTCCTAAAGATTTCAGGGTTGTAAGGCAAGAATGGGCTGCTATCCGCATTCAAACTGCTTTCCGAGGCTTCTT…	GbaIQD68	MGASAKWVKSLIGLKKTVKDDKEKMSGKSKKWKLWRSSSGDGIGSSWKGFKGKFKADYEGSDSSPRSEAFSAAMTAVVRAPPKDFRVVRQEWAAIRIQTAFRGFLARRALRALKGIVRIQAFVRGRQVRKQAAVTLRCMQALVRVQARVRARRVRMSIEGQAVQKILDEHRSKAELLKQAEEGWCDSKGTLDDVKIKLQLRQEGAFKRERALAYSLAQKQWRLNMDSNTRTNSSVSVPYLKNQVFDKNSWGWSWLERWMAARPWETRLMEQSQADPSEPTPPSKTCSESRKTTRPTEPCSVKVRKNNVTTRISAKPPHIGQGTRSSSSPSSEFRFEESSASSSICTSTTPVSWNTIPTSERTEKTGNSRPNYMNLTESTKAKQRAANHALRRIQMQSMD…	GbaIQD68	ATGGGTGCTTCAGCGAAATGGGTGAAATCTCTTATTGGTCTCAAGAAAACTGTAAAAGATGACAAAGAAAAGATGAGTGGCAAGAGCAAGAAATGGAAGCTATGGAGGAGTTCTTCAGGGGATGGAATAGGTTCCTCATGGAAGGGTTTTAAAGGAAAGTTTAAAGCAGATTACGAAGGATCTGATTCTTCACCAAGGTCTGAAGCTTTCTCTGCTGCCATGACTGCTGTGGTTCGAGCTCCTCCTAAAGATTTCAGGGTTGTAAGGCAAGAATGGGCTGCTATCCGCATTCAAACTGCTTTCCGAGGCTTCTTGGCAAGAAGGGCTTTAAGGGCTTTAAAGGGAATCGTGAGGATCCAAGCCTTTGTTCGCGGTCGACAGGTGAGGAAACAGGCTGCT…
GB_D07G0705	GB_D07G0705.1	GbaIQD69	ATGAGTCAAGACATAGATTCTCAGAAGTTCACTCTTCAGGATTCACCTTCTAATCCTGAAAGGATAAAGCAAGAACAATCGGCGACCCTGGTGCAGGCTGCTTTTAGGGGTTACCTGGTATTGTTATCCTATTCTTTGTGGATTTTTAGTATCAATTTTAAGAGTTTACATAACCAAGGAATAACCTTTAGCAGATATCATAGCCAAACTGACATCAGCTCTTTATGTGAAGGCTCGCCGAGCGTTCTGGGCACTCAAAGGGATTATAAGGCTGCAAGCACTTATTCGTGGCCACTTGGTTAGGAGACAAGCTATCTCTACTTTGTGCTGTATGATGGGAATTGTCAAGTTACAAGCTCGCGTTCGTGGACAACTGGTCAGACATTCTGATTGTGTCCA…	GbaIQD69	MSQDIDSQKFTLQDSPSNPERIKQEQSATLVQAAFRGYLARRAFWALKGIIRLQALIRGHLVRRQAISTLCCMMGIVKLQARVRGQLVRHSDCVHELQKKCNQINLLESKLVVSLGFNMPSHIGKLSAHAFVRKLIASSPTVMPLRLRYDVGEPNSVWIWLERWSASCFWKPVPQPKKTSNTKFEKKRVNGQTVEMDTGRAKRSVRRIPPANMDTSVQATSEFDKPKCNPRKISGHPAEPVQENPQNELEKVKRNLRKVHNPVVEHSLQSEFEFEKLKSLEKVSSTPDLDMVEESLNRSAEKTSKEAAMTANNSANKMKKETALTVNSSVEKRKKEMAVAVNSSTEKMSREMTTVNISAGGLNKEMAVTVKGSSEIIKKQVTTAASESPEIETMPWPLG…	GbaIQD69	ATGAGTCAAGACATAGATTCTCAGAAGTTCACTCTTCAGGATTCACCTTCTAATCCTGAAAGGATAAAGCAAGAACAATCGGCGACCCTGGTGCAGGCTGCTTTTAGGGGTTACCTGGCTCGCCGAGCGTTCTGGGCACTCAAAGGGATTATAAGGCTGCAAGCACTTATTCGTGGCCACTTGGTTAGGAGACAAGCTATCTCTACTTTGTGCTGTATGATGGGAATTGTCAAGTTACAAGCTCGCGTTCGTGGACAACTGGTCAGACATTCTGATTGTGTCCACGAATTGCAGAAAAAATGCAATCAAATAAACCTTCTGGAGAGCAAGCTTGTAGTTTCTCTTGGATTTAATATGCCCTCACACATTGGAAAGTTGTCAGCACATGCTTTTGTTCGT…
GB_D08G1154	GB_D08G1154.1	GbaIQD70	ATGGGAAAGAAAGGGAGTGGATGGTTCTCCACGGTGAAGAAAGTGTTCAAGTCTTCATCTAAGGACTTGCCCGAGAAAAAGGTAACTGATTTTTTTTGTTGTTGGGTTTTGGATTTCTTTGCTTAATTTCTAGGCAACCGATCAAAGGTTTTTATGTTGACATCTTTCAAGATTTTCTTTTTCAGATTTTCATTTTAAGGCAGACTTAAAATAAAATACAATAAACCCAAAATCCAAAACATTCTGGATTATGTTTCTTTTAGTTAGGGGTGCTTACCCTTTTCCTATCTGAACATGGTTAGCTCTTATCTGGGTATCTTACATGCCCATTATTCATAAGTCATCTGTTACAAAACTAGATTTATCGAACTTTTCCTACATGTTTAAAATATCATATTC…	GbaIQD70	MGKKGSGWFSTVKKVFKSSSKDLPEKKKESVEKWPNEGPKVVSFEHFPAESSPDITKDESEMSTPNKDSDHAIAVALATAAAAEAAVAAAQAAAKVVRLAGYGRHSMEERAATLIQSYYRGYLARRALRALKGLVRLQALVRGYNVRKQAQNTMRCMQALVRVQARVRARRLQLTQEKLQKRVDDDEDDNEEEKRGMEELKLERKPKSPLNKYDSWDGENVNGCASKKHDAVMRRERALAYAYSYQEEQRQHHEQLLVQPQHNGKDVGVYLNEREKAQWGWNWLECWMSPQPYPARQLGLQEGAYLALPRATTTTDNMLEKTVEMDVVTPIKSSSYLTQQQLQSDSSSVTSYMVTTQSVKAKGRSQGSAKQQRGAYVPEWNSSTKKASGCDSSSSGGGP…	GbaIQD70	ATGGGAAAGAAAGGGAGTGGATGGTTCTCCACGGTGAAGAAAGTGTTCAAGTCTTCATCTAAGGACTTGCCCGAGAAAAAGAAAGAGAGTGTTGAGAAATGGCCGAATGAGGGCCCGAAAGTAGTGTCATTTGAACATTTTCCGGCAGAGAGTTCACCAGACATCACTAAAGATGAGAGTGAAATGTCAACTCCGAACAAAGATAGTGACCACGCCATTGCTGTGGCCTTGGCAACCGCTGCTGCTGCAGAAGCTGCTGTTGCTGCTGCTCAAGCAGCGGCTAAAGTTGTTCGATTGGCTGGTTATGGACGCCACTCTATGGAAGAAAGAGCTGCAACTCTTATACAGTCGTATTACAGAGGCTACCTGGCTCGGAGAGCTTTGCGAGCTTTGAAGGGA…
GB_D08G1253	GB_D08G1253.1	GbaIQD71	ATGGGCCTTTTCCGGCGACTCTTTGGCGCCAAGAAGCCTGCCCAACAACGCCCCGACAAAGACAGGAGGCGTTGGAGCTTTACCAGATCTTCCCATCCCACGTCTTCGACTTCTCATCTTGATGCTCTTTCTGGTCCATGCAATGGCACATTGGATGCCAACAAGCGCGCCATAGCAGTAGCAGCCGCCACTGCTGCTGTAGCTGAGGCTGCTCTGGCTGCAGCGCATGCGGCGGCTGAGGTTGTTAGGCTGACAAGTGGTGGTGTTGGCAGCGCCGATGGGAGCAACCGACGCCTCCCACAAGAACTAGCGGCTGTTAAGATACAGTCCGCTTTTCGAGGTTATCTGGTTAGTATTTTCTTCTGTTCTAAATTTTATTTTATTCTTGCTTGAACTTTT…	GbaIQD71	MGLFRRLFGAKKPAQQRPDKDRRRWSFTRSSHPTSSTSHLDALSGPCNGTLDANKRAIAVAAATAAVAEAALAAAHAAAEVVRLTSGGVGSADGSNRRLPQELAAVKIQSAFRGYLARRALRALKALVKLQALVRGHVVRKQTADMLRRMQTLVRLQARARASRSYMTKSFYSTCKISHSRHARCGSNSNLMDTINLEKARMGSNWLDNWMEESLRNNHRDSPLIHRHADDVKSDKILEVDTWKPNLNCPPCNRNFRTSQHGSAFDYNQSYMAYGSPRKQSGKGSNQIPDNFSAEVLPLSSLKHPGRKDKAILRTADIDNNPQVLSASSSRPGSSARRSPFAKRECSWGYLSGFSGHPNYMANTESFRAKYRSQSAPRQRLEFDKYGSNRRTFQGLWDS…	GbaIQD71	ATGGGCCTTTTCCGGCGACTCTTTGGCGCCAAGAAGCCTGCCCAACAACGCCCCGACAAAGACAGGAGGCGTTGGAGCTTTACCAGATCTTCCCATCCCACGTCTTCGACTTCTCATCTTGATGCTCTTTCTGGTCCATGCAATGGCACATTGGATGCCAACAAGCGCGCCATAGCAGTAGCAGCCGCCACTGCTGCTGTAGCTGAGGCTGCTCTGGCTGCAGCGCATGCGGCGGCTGAGGTTGTTAGGCTGACAAGTGGTGGTGTTGGCAGCGCCGATGGGAGCAACCGACGCCTCCCACAAGAACTAGCGGCTGTTAAGATACAGTCCGCTTTTCGAGGTTATCTGGCACGGAGGGCACTGAGGGCATTGAAAGCATTGGTGAAGCTTCAAGCACTG…
GB_D08G1266	GB_D08G1266.1	GbaIQD72	ATGGGGAAGATTGGAGGAAACTCTTGCTTGACTGCAGTCAAGAAAGCCTTTAGGTCTCCTACTAAGGAAAACGATAAGAGGAGCTGTAGAAGGAGAGACGATGGTGAACAAGAGGAAGAAGAGAAGGTTATTATTTTCTCTTCAACTTATCCTTTTTCTCTTGAATGTTTTTGTTTGTGCATGTGATTAACTTTAAATCAATGTTCTTTTTCTTGGTTTGCGCAGAAAAGAGGGAAACGAAGATGGATTTTCAAGAAGCCTCCGTATCAGGAAACAGTGATACAACACAGTGAAGCAAGCACCATAGTTACAATAGCCAATGCTAAAGTTGCCACTAATTCAGAAACCTCAGCACTGAATACCGTTCCCGAAGCTGAGCAAAGATCACATGCCATTGCG…	GbaIQD72	MGKIGGNSCLTAVKKAFRSPTKENDKRSCRRRDDGEQEEEEKKRGKRRWIFKKPPYQETVIQHSEASTIVTIANAKVATNSETSALNTVPEAEQRSHAIAVAIATTAAAQVAVATAQAAVEVVRLTRPSVFLREHIAAIVIQTAFRGYLAKRALRALKGLVKLQALVRGHNVRKRANITLRCMEAMARVQARVRDQRKRLSVHERSMDSIFSDHRTNTLWSSYLADRKSIYSRGESNYDDDWRTHWDEHPKTLKEIQAILQKTKQATMKREKALAQAFSNQIWTGDRNTVESEDEVDGKTRWVDRWTTRKQWESTGRMSSHHIDSIKTVEIDTSRPYSYSAPHSQNPNSQYHYQQRRPSSFSVASPLHKTINGLPIRSITPSPSKAKPLQIYSASPRYL…	GbaIQD72	ATGGGGAAGATTGGAGGAAACTCTTGCTTGACTGCAGTCAAGAAAGCCTTTAGGTCTCCTACTAAGGAAAACGATAAGAGGAGCTGTAGAAGGAGAGACGATGGTGAACAAGAGGAAGAAGAGAAGAAAAGAGGGAAACGAAGATGGATTTTCAAGAAGCCTCCGTATCAGGAAACAGTGATACAACACAGTGAAGCAAGCACCATAGTTACAATAGCCAATGCTAAAGTTGCCACTAATTCAGAAACCTCAGCACTGAATACCGTTCCCGAAGCTGAGCAAAGATCACATGCCATTGCGGTGGCTATTGCTACCACAGCAGCTGCTCAAGTAGCAGTAGCAACCGCTCAAGCTGCTGTAGAAGTTGTTCGGCTCACCAGGCCTTCCGTTTTCTTGAGA…
GB_D08G2143	GB_D08G2143.1	GbaIQD73	ATGGACAAAGCCTCCAAGTGGTTCCGCAGTATCCTCGGTCTCAAAAGAAGAGACTCCCACAAACAACCACCTTCTTCCAAACGTCGTTGGTGTTAGTACAAAACTCCGGTAAGGAAAAAACTCGAACACACGATCGGAACTCGAAAAGAAAAAGAAGAAATAGGACAGGCTCCAAGGCGTGTATCAAGCCACTATCTTTAAGGTTATATTCGCCCCCACTTATCTTCAGTGTGCAAACGAGTTCCAAGCAAACCTCGAGGATACAATGAAGCCAATGACTATTTGCGTTTTGCACTGACGAGAATAGTCCACTATGCACTGAGTAATGTATAACAAAAACTCAATTTTTACAAAGAATTTCTGCAGCAATACTTTATAGAATAATCTAATAATGTTAGA…	GbaIQD73	MDKASKWFRSILGLKRRDSHKQPPSSKRRCWSFVKSYREKDSSAVSTATSSLRGLQQPLEDSVSVIDANIGYDAVDDNNDHAIAVAAATAAVAEAAVAAAQAAAVVVKLTGSNGRCARDPVSHISNSYGAGEELAAVKIQSTFRGYLARRALRALKGLVKLQALVRGHIERKKTTEWLRRMQAFLQTEARARAGQTQISESSRISSKSSHYLHPGPPTSENFEHAVQLKSTKSEQSSMLKRNGSRLSGRTCDNYEQIHPGWYTSDHWIDVRSWDQRGHSTRIGHMVDEKNDKILEVDIGKPRFTSKLRNLFRSTHLALNSDLYSCSFTNSRDSHQTAPTPLFEAQSLNPLKFPHEVEESLFCTVDNSPNFHSASSKGGSSMRSPFTPAKSDGSRSYLSG…	GbaIQD73	ATGGACAAAGCCTCCAAGTGGTTCCGCAGTATCCTCGGTCTCAAAAGAAGAGACTCCCACAAACAACCACCTTCTTCCAAACGTCGTTGTTGGAGTTTCGTTAAATCCTACCGCGAGAAGGACTCCTCCGCCGTCTCTACTGCCACGTCGTCGCTTCGCGGTCTTCAGCAACCACTCGAAGATTCCGTTTCTGTTATTGACGCGAATATTGGGTATGATGCAGTGGATGATAATAATGACCACGCCATTGCTGTGGCTGCCGCCACTGCCGCGGTTGCCGAAGCAGCCGTTGCGGCTGCTCAAGCTGCCGCTGTGGTGGTTAAGCTCACCGGAAGCAATGGTAGGTGCGCGCGTGATCCAGTGTCTCACATTAGCAACAGCTACGGGGCAGGCGAGGAA…
GB_D08G2866	GB_D08G2866.1	GbaIQD74	ATGGGAAAAGCTACGAGGTGGTTGAAGAGCTTATTTGGGATAAAGAACAGCAAAGACTACTTGAATTCCGGTGACCGGAAAGGCAAAAAAAGGTCTAGAATTGCCCGTTCGGGGAGGGATCCCAGCGGCGGATTGTGTCACAGCGTTACAGCGACACCACCACCAAACATGTCACCGGCAGAAGTGTCTATGTGGATAAGGTCATACTACAATGAAACGGAGAAGGAACAAAACAAACACGCAATCGCCGTAGCGGCAGCCACGGCAGCGGCTGCCGATGCTGCGGTGGCCGCTGCGAAAGCAGCCGTGGCGGTCGTGAGGCTGACAAGTCACGGAAGGGGAACCATGTCCGGGCACGAGAGATGGGCTGCTGTTAAAATTCAAACCGCGTTTCGAGGT…	GbaIQD74	MGKATRWLKSLFGIKNSKDYLNSGDRKGKKRSRIARSGRDPSGGLCHSVTATPPPNMSPAEVSMWIRSYYNETEKEQNKHAIAVAAATAAAADAAVAAAKAAVAVVRLTSHGRGTMSGHERWAAVKIQTAFRGYLARKALRALKGLVKIQALVRGYLVRKQATIRSHKANRFDIRARKSMERLYSFNHTTNGIDENSKIVEVVDIDRPKSRSRRNVNASKSDFGDEYQPVHRTLSSPFLSRVPARISIPDGRDWGLTGDEYRFCTAQNTPRVISSCGSNSNVSVAPPPRSVCSDNWFRHYGNYPNYMANTQSFKAKLRSQSAPKQRPELGPKKRLSLDEMVESRCSLSGVRMQRWCSQV	GbaIQD74	ATGGGAAAAGCTACGAGGTGGTTGAAGAGCTTATTTGGGATAAAGAACAGCAAAGACTACTTGAATTCCGGTGACCGGAAAGGCAAAAAAAGGTCTAGAATTGCCCGTTCGGGGAGGGATCCCAGCGGCGGATTGTGTCACAGCGTTACAGCGACACCACCACCAAACATGTCACCGGCAGAAGTGTCTATGTGGATAAGGTCATACTACAATGAAACGGAGAAGGAACAAAACAAACACGCAATCGCCGTAGCGGCAGCCACGGCAGCGGCTGCCGATGCTGCGGTGGCCGCTGCGAAAGCAGCCGTGGCGGTCGTGAGGCTGACAAGTCACGGAAGGGGAACCATGTCCGGGCACGAGAGATGGGCTGCTGTTAAAATTCAAACCGCGTTTCGAGGT…
GB_D08G2921	GB_D08G2921.1	GbaIQD75	ATGGGTGCTTCAGGGAAATGGGTAATATCTCTTATTGGTCTCAAAATAACCCAAAAACAACACCAAGTAAGCTCTGGGTTTTCTATGTTATTCCACCGTAAAAATATTTATTTACATTTTAAAGATTTAAAGCTCTTTCCTTTTTGTGTGTTTATGTAGGAGAAAGTGAATAACAACAAGAAATGGAAGCTATGGAGAAAGTTTAGATCAGATTCTCAAAGCTCTGATTCTTTCATTGCTGCCATGGCCGCCATTGTTCGAGCTCCTTATAAAGATTTCAGTTTTTTAAAGCAAGAATGGGCTGCCATTCGCATTCAAACAGCTTTTCGTGGCTTCTTGGTAAAGTTGAAGTCTTTTTTTTTCCTTTACATGTTTGGTATCCGAGAAAGTGATGGAATG…	GbaIQD75	MGASGKWVISLIGLKITQKQHQEKVNNNKKWKLWRKFRSDSQSSDSFIAAMAAIVRAPYKDFSFLKQEWAAIRIQTAFRGFLARRALRALKGIVRLQALVRGRQVRKQASVTLRCMQALVRVQARVRARRVRMSIEGQTVRKMLDGHRSKDDVLKQAEDGWCGSKGTLEDVKTKLQMREKGAFKRERTLAYSLAQKQWKSVPGSTTRTNGLIPCLISQEFDKNSWGWNWLERWMVARPWETRLMELSTRTDPSKTCLESLSGKNERCSEPCSMKARKNNVTTRVSAKPPPHTTQVTRLSSSPSSEFRFDESSGSSSICTSTTPVSGTTVLPSDATGDSGNSRPNYMNMTVSTKAKQRSGNHGFQRQSMDEFEFKRSAGFDNRDSKSSKRGNCLYN	GbaIQD75	ATGGGTGCTTCAGGGAAATGGGTAATATCTCTTATTGGTCTCAAAATAACCCAAAAACAACACCAAGAGAAAGTGAATAACAACAAGAAATGGAAGCTATGGAGAAAGTTTAGATCAGATTCTCAAAGCTCTGATTCTTTCATTGCTGCCATGGCCGCCATTGTTCGAGCTCCTTATAAAGATTTCAGTTTTTTAAAGCAAGAATGGGCTGCCATTCGCATTCAAACAGCTTTTCGTGGCTTCTTGGCAAGGAGAGCATTGAGGGCTTTAAAAGGAATTGTGAGGCTACAAGCTTTGGTTCGAGGTAGACAAGTTCGGAAACAAGCCTCGGTGACGCTTCGATGCATGCAAGCTCTCGTTCGTGTTCAAGCTCGAGTCAGGGCTCGTCGTGTTCGAATG…
GB_D09G1146	GB_D09G1146.1	GbaIQD76	ATGGAAAATGTGAATTCTTTTAGTCTCTCTCTCTCTCTCTCTATATATATATATATATATATATATGTATATATATATATAAATTTTGGTTGCTACCTTACTAATGAGATGACAACGATTTGCAGGGGGTGCTTGAAGTGAGAAGGTTGATGGGGAATTTATGGTTGCTTTACTTAGAATTAACCAATTGACAATCTTTTAAAGTAGCCGAGGTCCTTCTTCTTCAACCCAAGATTGAAACTTGAAAGGTTAGTTGATAATGTCTTTGCATATTGTTAGTGAATTGAAAATGGTGATTCCTTCTCTCTTTTTTTCCTTCATTCAATAATTACTCATTTGACACCATTTTCTTCCCTGTATCTACTTGTTTGATGCTTCCAATTTGTATGGCCACCGAAA…	GbaIQD76	MENPRSFFFNPRLKLERSALSSSVVIVGTMGVSGKWIKALVGLKKTDKSQSSEKKVNRGATSKFRHRRKHSIDFDTDKLQEGLDQNAASPARDANTQAIADAAGSPSGSLEVRDAALNELVMEEWAATRIQTAFRGFLARRALRALKGLVRLQALVRGHAVRKQAAMTLRCMQALVRVQARIRARRVRLTLESETAQQKLQQQLADEARVKEIEEGWCNSIGSVEEIQAKLLKRQEAAAKRERAMAYALAHQWQAGSRQQSVPAGFEPDKSSWGWNWLERWMAVRPWENRFLDINLQDGVVACEDGSAEGKNGANSQIKPAIKKPAASNLHANLSNLKIGLSYSEGSDSPPGKSANVVDAVNALSSKPKSKPIIEDLGEEAGSKPVITSRSRSNPKERS…	GbaIQD76	ATGGAAAATCCGAGGTCCTTCTTCTTCAACCCAAGATTGAAACTTGAAAGGTCTGCTTTATCTAGTTCAGTTGTCATTGTTGGTACCATGGGTGTCTCAGGAAAATGGATCAAAGCATTGGTTGGCTTGAAAAAAACAGACAAGTCACAATCCTCAGAGAAGAAAGTAAATAGGGGAGCTACCAGCAAATTTCGTCACCGAAGGAAGCATTCCATTGATTTTGACACAGATAAACTTCAAGAAGGGTTGGATCAGAATGCTGCTTCACCAGCCAGAGATGCTAATACTCAAGCAATTGCAGATGCTGCTGGCTCCCCCTCTGGTTCACTTGAAGTGCGTGATGCAGCTCTTAATGAACTTGTAATGGAAGAATGGGCTGCCACAAGGATACAAACAGCT…
GB_D09G1320	GB_D09G1320.1	GbaIQD77	ATGGGAAAGAAAAGGTGCTGGTTTAGTTGGGTGAAGAAGATATTCGCTTCTGATGCGAAACCAAAACCGGAAAAGGTTCATTTTTAACTCCTTTTTTTTGTTGTTGTTGTTGAGAATAATAGCTTTTGGTTTATAAAAAGTTTGATTGTACTTTGCAGAAATCAAGGAGGTGGAAATGGATTTTTAGAAGACTGAAACTAAAGCAATACCACCCTGCACTTCCCCCACTTCAAAAATCATTGTGTGAAGCAAGGGAAGAGCAAAGAAATCATGCTTTAAACGTAGCCATTGCAACAGCTGCCGCAGCGGAGGCTGCAATTGCTGCCGCCCAAGCAGCGGCTGAGGTTGTGCGTCTCACATCTGCCTCTAACCCTTCTCATCATTTCACTACAATCGACA…	GbaIQD77	MGKKRCWFSWVKKIFASDAKPKPEKKSRRWKWIFRRLKLKQYHPALPPLQKSLCEAREEQRNHALNVAIATAAAAEAAIAAAQAAAEVVRLTSASNPSHHFTTIDRNLAALNIQTAFRAHLARKALRALKGVVKLQDIVRGRAVRRQALINRKCLQSGTNMYPKVKEKSTSPTRVICQDSRRKQSLMNKDELQDKDIKGQYACNSEKSWNDSVLSKQDIEVKFLRSQEAMAKRERMKKYSYSHRERLNTRMLDELVHVKEAKAEANERDRVMISKLDVPSNLSTWEINGPPHVRHRKLKKQQDTLNGMNSPFSFPRRSFSLTQQSAAGDEGSIPNSPVFPSYMGATECAKAKARSRSTPRQRVGFWDSCFDNSGAYKGGLSLWSTYEGEPFSIDENCCL…	GbaIQD77	ATGGGAAAGAAAAGGTGCTGGTTTAGTTGGGTGAAGAAGATATTCGCTTCTGATGCGAAACCAAAACCGGAAAAGAAATCAAGGAGGTGGAAATGGATTTTTAGAAGACTGAAACTAAAGCAATACCACCCTGCACTTCCCCCACTTCAAAAATCATTGTGTGAAGCAAGGGAAGAGCAAAGAAATCATGCTTTAAACGTAGCCATTGCAACAGCTGCCGCAGCGGAGGCTGCAATTGCTGCCGCCCAAGCAGCGGCTGAGGTTGTGCGTCTCACATCTGCCTCTAACCCTTCTCATCATTTCACTACAATCGACAGAAACTTGGCTGCTCTTAATATCCAAACTGCTTTTCGGGCACACCTGGCAAGGAAAGCACTGAGGGCATTGAAGGGAGTAGTG…
GB_D09G1646	GB_D09G1646.1	GbaIQD78	ATGGGTGGACTTTGTTTCCAACCAAACCAATCAGGGGAGGGTGGCAATGCAGTTAGATAAGTGTGTCGCATTTTTTGCCCCAAGAACTGGGTCACACTAGCAAAAGGACCAGCTGTTTCTTCTTCATATTCTCTAAAATCCACTTGTCAACTTCTCTTTATATATTCCATTTTCTTCTCCATATCAAAAGGATGCAGTCTGCTAAGCCTATGCAGTGACAACCTTTCAAATTTCTGGGTTCTTTTTTTCTGTTTTTATTGTGAATAGAAAGGGAAAGAGCACTCTTCAAATTCTTTGAGATCTGGGAATTACAATCTCAGGTGCTTCTGCTACTTTTTTTTCTCTTCAAATTCTTTGAGATCTGGGAATTACAATCTCAGGTGCTTCTGCTACTTTTTT…	GbaIQD78	MGGLCFQPNQSGEGGNAKGKEHSSNSLRSGNYNLRVHSEERYDGEERKMVVFFEESVQPRFPGKKNQKSKQQLLEKQVHLGSNDSGAATLETVNLSPPPPEEVKPIEAESKQTYPVVVATAAASPQAAVEVVQRQLNRDALFAGKSEEEVAAIKIQTAFRVYLARRALHALKGLVRLKSLMEGPVVKRQAASTLRCMQTLSRLQCQVRIRRTRMTEENQALQRQLLQKHAKEIVNLQMGEDWDDSLQSKEQIEASLLSKHEAAMRRERAMAYSFTHQQTWKNASRSMNPLFMDPNNPSWGWSWLERWMAAQPQEGRGTTEKEQNDQSSIRSARSNFGGEISKAYARYQLNLDKQSPKAGQKPNQTSSLLSVSTPKTSASIPARKLKSASPRSSVVGPDD…	GbaIQD78	ATGGGTGGACTTTGTTTCCAACCAAACCAATCAGGGGAGGGTGGCAATGCAAAAGGGAAAGAGCACTCTTCAAATTCTTTGAGATCTGGGAATTACAATCTCAGGGTTCACAGTGAGGAAAGATACGATGGGGAAGAAAGGAAAATGGTTGTCTTCTTTGAAGAAAGTGTTCAGCCCAGATTCCCAGGAAAAAAAAACCAGAAATCAAAACAGCAGTTGTTGGAGAAGCAGGTGCATTTGGGTTCCAATGATTCTGGTGCAGCCACTTTAGAAACTGTCAACTTGTCCCCTCCTCCGCCAGAAGAAGTTAAACCGATTGAAGCTGAAAGCAAGCAGACTTACCCTGTGGTAGTTGCCACTGCTGCTGCTTCACCTCAGGCTGCCGTAGAGGTTGTTCAA…
GB_D09G2252	GB_D09G2252.1	GbaIQD79	ATGGGAAAGAAGGGAAGTTGGTTTTCTGCAATTAAAAAAATTTTCTTTCCACACTCCAAGGAAAAGCTAAATAATGTAAGTTGTTATTCTAACAATGATGCATATGAACTTCACCATTTCATCCGTGCTTTTGTTTCAACTCTACAAATTTATACAATCGTAGATGATATATGGTTGCTTAATTTCGTTCTTTCTCTTGTGTATGAAGTTTAAACATGCCTGTAGGTTGTGCTGGCATGAAAAACAGTTTTATGTTCTCAAACCAGTTTGTGATTACTGAATAGAAGAGCATAAGAACCTGGAATTTGGAAAAAGGGTCTAAAACAAAAGTGGATATAATTAGTTGCCTTTTGATGAACTATAGATGCATCTAATTGGAGTGTGAAATTTCTGATTGAA…	GbaIQD79	MGKKGSWFSAIKKIFFPHSKEKLNNESEKRSDKEKKKGPGKLRHGETNSFLPLFRKPSSIEKILGEAEREHNLIFRPPTPPEQPRTPPFVPHRPASPQGPSPRVASPRVASPRAASPPRAASPRAASPPPPPPPPPRAASPRVASPRGASPKPAPSRIVRPRPEPTLKNQHASATQIQAAYRGYKTRRSFRALKGLVRLQGVVRGQHVKRQTTNAMKYMQLLVRVQSQIQSRRIQKLENQERQQAESKEAESTLGKWTSQSEAGNENWDDSVLTKEEREARMQRKVEAVIKRERAMAYAYSNQLWKSTPGSGIRSGGFPWWWNWLDHPLPPVNAPGSQGTKSFQLTPPRPNSQLKPSSRPQSSSSRQRQFTYDNIMETPTPKSTRSTILHAKRRMRTPP…	GbaIQD79	ATGGGAAAGAAGGGAAGTTGGTTTTCTGCAATTAAAAAAATTTTCTTTCCACACTCCAAGGAAAAGCTAAATAATGAATCGGAAAAAAGAAGTGATAAAGAAAAGAAGAAAGGCCCAGGAAAATTAAGGCATGGAGAAACCAATTCCTTCCTTCCCCTCTTTAGAAAGCCCAGCAGTATAGAGAAAATTCTGGGGGAAGCTGAACGAGAGCATAATCTAATATTCAGGCCTCCCACACCTCCGGAGCAGCCAAGAACACCACCTTTTGTGCCTCATAGACCTGCATCTCCACAGGGTCCATCTCCAAGGGTTGCCTCTCCTAGGGTTGCTTCTCCAAGAGCTGCTTCCCCTCCACGAGCTGCATCCCCTAGAGCTGCTTCACCACCTCCACCTCCACCT…
GB_D09G2341	GB_D09G2341.1	GbaIQD80	ATGGGGAAGACAGCGAAATGGTTGAAAAGCCTGTTGACTGGTAAGAAAGACAAAAGTAGAAACATAAGTAATAATCAGAATTCTTCAGTTGTCCCTGAGAATCCAACGACGACCGTTTCGATCCCACTGCCACCGACAACTCCTAAAGAGAAACGACGATGGAGTTTCCGGAGATCTTCGGCTTCAGCGACGCCTGTTAGGGAGTTGAATTCTGTAGAACAAGTGGTTACCCCTTCACCTCCACCACCACCGGCTCCGCCGGTTGTGACGGATGTGATCCGGGTAAGTGGTAGTGCTGACGATGAGAAAGTTGATGCAGGTGAAGAGGCCGCTGCTAAGATGATTCAAGCTGTGTTTCGATCTTACCTGGTATGTTATAATTTGTTAGATTTGATGGCT…	GbaIQD80	MGKTAKWLKSLLTGKKDKSRNISNNQNSSVVPENPTTTVSIPLPPTTPKEKRRWSFRRSSASATPVRELNSVEQVVTPSPPPPPAPPVVTDVIRVSGSADDEKVDAGEEAAAKMIQAVFRSYLARKALKALKGIVKLQALVRGHLVRRQASVTLKCMQALVTAQARARAQRIRMVEDSRPASRRQSPHRRSTTPDQRLRHGYHEIDSGVEENIKIVEIDHGDSKASLQSRNSYSMEHRFSNPQASPVTSSYLADQISPGACSGHFEDHFFTVAQSSPHYAESETFEYSFCPNYMANTESSRAKARSQSAPKSRPDSIERQPSGRRRSSTEGRNHVPKAMKMKRSSSHVGAAEKNSQYQYQYQYPWSIKLDRSSVSLIDSECGSTSTVLTNTNYCRSHFG…	GbaIQD80	ATGGGGAAGACAGCGAAATGGTTGAAAAGCCTGTTGACTGGTAAGAAAGACAAAAGTAGAAACATAAGTAATAATCAGAATTCTTCAGTTGTCCCTGAGAATCCAACGACGACCGTTTCGATCCCACTGCCACCGACAACTCCTAAAGAGAAACGACGATGGAGTTTCCGGAGATCTTCGGCTTCAGCGACGCCTGTTAGGGAGTTGAATTCTGTAGAACAAGTGGTTACCCCTTCACCTCCACCACCACCGGCTCCGCCGGTTGTGACGGATGTGATCCGGGTAAGTGGTAGTGCTGACGATGAGAAAGTTGATGCAGGTGAAGAGGCCGCTGCTAAGATGATTCAAGCTGTGTTTCGATCTTACCTGGCAAGGAAAGCTTTGAAAGCGTTGAAAGGG…
GB_D10G0319	GB_D10G0319.1	GbaIQD81	ATGGGTTCTGGAAATGTGTTGAAGACACTAGTGAATATAGTGAAGGATGACAGCTCAAAGCAAGTGAAGGTATATCTATCATTATTTTACTTAACAATCATAAGCTAAGCTCTGCAAGTTTTCTGTTATCTTGTTATGAATAAAATCTGAGTTTGGTTCTGAAATAATTCATTTGCTATTTGAATCTTTTGGACTAATGTTATCCAAATTCCAAACCCTTTTGGGAAGTGTAATCTTATGTACCATTGGAATGACAAAATTTGAAGCTTTTAGTTACTTTTTTTTCAATGAATCCGAGCTCATATTCGGCTATAAGTGTCACTTCTATACCTTCCCTGACACCATTTTTTCAATTTGGTTTTGTCATATGCCAACATCTGAATATGCGTTTGGATGCTT…	GbaIQD81	MGSGNVLKTLVNIVKDDSSKQVKRSSASTKSKGFKWKKLQRKTSMRTKFIRDSAALGMSIEDLAATRIQTAFRAYRARKKLRLLKGIVRLQAKTKTYSIKKQATTTLNYLHSWSNIQAQIRARRLCMVTEGGLRQKKIANQLKLEAKLHELEVEWSGGPGTMEEVLTKIHQKEAAAVKRERTMAYAFSHQWRAPNSINNGLGSYKLAKANWRWSWVERWIAVRPWERRLPTPSTTPKSTPKEPQNKQTSKGGKNSNSPKPKASVSVKPPLSNAKGAMKPRRLSYPGAEKPAARQVNTKADKINIEKEEIST	GbaIQD81	ATGGGTTCTGGAAATGTGTTGAAGACACTAGTGAATATAGTGAAGGATGACAGCTCAAAGCAAGTGAAGAGATCTTCAGCTTCTACAAAATCCAAAGGCTTCAAATGGAAGAAACTCCAGCGAAAGACGTCCATGAGAACAAAATTTATTAGAGATTCCGCTGCTCTTGGTATGTCAATTGAGGATTTAGCAGCAACTCGGATTCAAACCGCATTCCGAGCCTATAGGGCTAGAAAAAAATTACGTCTATTGAAAGGTATAGTAAGATTACAGGCTAAAACCAAAACTTATTCAATCAAAAAGCAAGCTACAACAACATTAAATTATCTTCATTCATGGAGTAACATACAGGCTCAGATAAGAGCTCGTCGACTATGTATGGTAACGGAAGGCGGTCTT…
GB_D10G1315	GB_D10G1315.1	GbaIQD82	ATGGGAAAGAAAGGAAGTTGGTTTTCTGCAATTAAAAGGGTTTTCATACCACACTCCAAGGAAAAGCTAAGTAATGTAAGTTCGTATTTTTAACTAGGTGCATATGGACTTCGCTACTTTGTCTATGGTTTTGATTAACTATATGAAAAGAACGTACTAATTGTAGATGTTTTTTATTGTTTAATTTCATCATCTATCTCATATTTTTGTTAGAGAAAAACTTACATTTTGTGTATAAGGTTCAAACATCCAGCAGATAGTTGTGATTGCTGATTAGGTAAACAAAAGAACCCGGCATTTGGAAAGAAGTCAAAATAGAAATGGGTAGAATTAGTTGCCTTTGGAGAGTGAAATTTCTGATTGAAGACATTTTTGTTGCATAGTCAGCTCTTGAAGTCA…	GbaIQD82	MGKKGSWFSAIKRVFIPHSKEKLSNESDKRSGKEKKKKGLGKLRHGETNSFIPLFREPSSIEKILGEAEREHKLVFRPPTPPEQPTTPPFVPHKDASPRVPSQRIASPRIASPRAASPRTVSPPRAASPRAAPPKVVRPRPEPTLRNHHASATKIQAAYRGYMARRSFRAWKGLVRLQGVVRGQNVKRQTSTAMKRMQLLVRIQSQIQSRRIQMLENQARQEVHFKNDKEVESTLGKLAFSQASEAGNEDWDDSVLPKEEIEARMQRKVEAVIKRERAMAYAYSHQLWKTTPKPVHADIRTRGFPWWWNWLERQLSSSNTPESQGIKNFPLTPPRPNSELKPSPKPPLSSKQHQFMFDNMDTPTPKSTRSTTRPMQTPPSRILQGSSSGLSKYSRPRAS…	GbaIQD82	ATGGGAAAGAAAGGAAGTTGGTTTTCTGCAATTAAAAGGGTTTTCATACCACACTCCAAGGAAAAGCTAAGTAATGAATCGGATAAACGAAGTGGTAAAGAAAAGAAGAAGAAAGGCCTAGGAAAATTAAGGCATGGAGAAACCAATTCCTTTATTCCCCTCTTTAGAGAACCCAGCAGTATTGAGAAAATTCTTGGGGAGGCTGAAAGAGAGCATAAACTAGTATTCAGGCCTCCAACACCTCCAGAGCAGCCAACGACACCACCTTTTGTGCCTCATAAAGATGCTTCTCCAAGAGTTCCTTCACAGAGGATTGCCTCTCCTAGGATTGCTTCCCCGAGGGCTGCTTCTCCAAGAACCGTTTCCCCTCCACGAGCTGCTTCTCCAAGAGCTGCTCCA…
GB_D10G2806	GB_D10G2806.1	GbaIQD83	ATGGCGAAGAAGAAGAGCTGGTTCAATCTAGTGAAGAGGTTCTTTCTCTTTGAGACACTTATAAATGCACAAAAGGTAACTCCCCCCCCCCCCCTTTTGTTTTCGCTGTTCTTGTATGGATGAATGGCTGTCATGGATGTTAATATGTTATATATATCTGTCGGTAGGATAACAGAAGGAAATGGATGTTTGGAAGGTTTAGGACCAAAAGGTTAGCATCCATTAAAGCTCCATCACCACCAAGAGACAGCATAAAATATGAAACAGAGGAAGACCAGAAGAAACATGCCTTAACAGTGGCAATTGCCGCAGTGGCTGCTGCTGAAGCAGCTGTTGCAGCTGCTCAGGTTGCAGCCGAGGTTGTTCGCCTCACAGGCGCTGATGCCCCTAAAGCTAAAG…	GbaIQD83	MAKKKSWFNLVKRFFLFETLINAQKDNRRKWMFGRFRTKRLASIKAPSPPRDSIKYETEEDQKKHALTVAIAAVAAAEAAVAAAQVAAEVVRLTGADAPKAKEEQTIDVKPDCSSSSELDNQFQQLAAVKIQASFRGYLARKALRALKGIVRLQAIIRGRVVRRQALTALKCLQSIVNIQSQVCARRFQMVEGTWQQHDENKELITLKDKILKVDTNSQTRWDNCNGRLKYWLDQWVDTKSKDVEVEDIDSVWTSNRKPTRLKTFSRQYHCDAEGVDSPVRVQRRRSFHGKQSSLGEDSSFITSPVVPTYMAATQSTKAKVRSMSSPKLRPGTCDTQSESYSPYKNKLCLISSVTSKPNAYEQRSPTLKGIKSKQTLKDLSFDSECSLPNWVQKSTFK	GbaIQD83	ATGGCGAAGAAGAAGAGCTGGTTCAATCTAGTGAAGAGGTTCTTTCTCTTTGAGACACTTATAAATGCACAAAAGGATAACAGAAGGAAATGGATGTTTGGAAGGTTTAGGACCAAAAGGTTAGCATCCATTAAAGCTCCATCACCACCAAGAGACAGCATAAAATATGAAACAGAGGAAGACCAGAAGAAACATGCCTTAACAGTGGCAATTGCCGCAGTGGCTGCTGCTGAAGCAGCTGTTGCAGCTGCTCAGGTTGCAGCCGAGGTTGTTCGCCTCACAGGCGCTGATGCCCCTAAAGCTAAAGAAGAACAAACCATTGATGTTAAACCTGATTGTTCTTCATCTAGTGAGCTTGACAACCAGTTCCAACAACTTGCTGCTGTAAAAATCCAGGCT…
GB_D11G0333	GB_D11G0333.1	GbaIQD84	ATGGGAAAATCACCGGGAAAATGGATTAAGGCTGTGCTTTTTGGAAAGAAGTCTTCCAAATCTGGTTATCATAAAGGAAGGGAGGTAATATTTATTGCTAATTACTACTAAACGAAAAATATAATGTTTAGATTATGTACATGAGGAACTGCAAATATAGTTCCTCTGTCATTTGGTTTATTTTTGGTGGCTTCATTCCCTCTACTGAGAAAGTTAAGTAATTGTAAAGGATTAGCTGATTTGAACAGTAGCTTCCCCGAAATTTCTCGGGAGCTGTTGTATTTAACATGGCTGTTTTAATGCTTTGGTTTTGGGAATGTATCATTCTTTCCTCGAGTTATGAGATAAACATGATATGGCATCTTTCTTCCATCAATCCTAAAATATTTATGTACACTT…	GbaIQD84	MGKSPGKWIKAVLFGKKSSKSGYHKGRENVANVNEVLVSARASEAEVPVAPPFPSQLNQYANERNERDERKLELENKEAANIYNDDRISLPVSQGIGSQESTLQDFQNDPERMKQKQAATIVQAAFRGYLARRAFWALKGIIRLQALIRGHLVRRQAIATLCCVMGIVKLQSHIRGVMARRSDGGLEVHKKYNQMNLWESKPVVSLGVNMPARIGKLSANTFVHKLVASSPPVMPLRLHDDTGEPNSVWNWLERWSASCFWKPVPQPKKASKLQKKQANGQVVETDSGRPKLSVRRIRPANLDGASVQATSEFDKPKRNLRKVSSHPAEMAVQENPQNELEKVKRNLRKVHNPVVENSVQSRVEPDKPKQSLEKFSSATNPDVVEQSLNSLAEKANKEM…	GbaIQD84	ATGGGAAAATCACCGGGAAAATGGATTAAGGCTGTGCTTTTTGGAAAGAAGTCTTCCAAATCTGGTTATCATAAAGGAAGGGAGAATGTTGCCAATGTAAACGAGGTGTTGGTTTCAGCCAGGGCATCAGAAGCTGAAGTCCCTGTGGCTCCTCCCTTCCCTTCACAGCTTAATCAATATGCTAATGAGAGAAATGAGAGAGATGAAAGGAAATTAGAACTGGAAAACAAGGAGGCTGCAAATATCTATAACGATGACAGGATATCACTACCAGTGAGTCAAGGCATAGGTTCTCAGGAATCCACTCTTCAAGATTTCCAAAATGATCCTGAAAGAATGAAGCAAAAGCAAGCAGCAACCATCGTTCAGGCTGCTTTTAGGGGTTACCTGGCTCGCCGA…
GB_D11G1088	GB_D11G1088.1	GbaIQD85	ATGGGGAAGAAAGGAGGGACTTCCTGGTTGACTGCTGTGAAAAGGGCTTTTAGATCTCCTACTAAAGACGGTCATGATAAGAGAAGTAACAGAAGAAAGGATGAACCTGACCACCAAGATGAGGATGAAGACAAGGTTTGTATTTATAGTATCAATGAACTCTTCATTCATTACTATACATGAAAACAGAAGAAAATAAAACAAAACAAAAAAAAAAGTAAATGAAGTTGAATCTTTTACTGTAAATATAATTCTTGGTCTGTTACTGGTTTTGGTAGAAGAGAGAGAAGCGAAGGTGGATCTTCAGGAAACCCACAATTCAAGAACCGGTGATTCATCAGCAAACAACACCAGTGAAGGCTACAGGTCGTAATGGTGCAGGTGCAGCATCAGATGGTG…	GbaIQD85	MGKKGGTSWLTAVKRAFRSPTKDGHDKRSNRRKDEPDHQDEDEDKKREKRRWIFRKPTIQEPVIHQQTTPVKATGRNGAGAASDGATATAAEQRYDTPRAATEGAAVVQVARPTRPSNYAREHHLAAIVIQTTFRGYLARRALRALKGLVKLQALVRGHNVRKQAKITLRCMQALVRVQARVLDQRVRLSHDGSRKSAFSDTNSVLESRYLQDISDRRSLVSREGSSIADDWDERPHTIEEVKAMLEHRKEAALKREKNLSQALSQQMRRARRSPSMGDEDEVECRPKWLDRRTPAKPWDNRGRASTDHRDSVKTVEIDTSQPYSYLAPIYRRTNSNQYHQHGPQNQRPSSPLHRAQQNAPMHHSPVTPSPSKARSIQVRSSSPRCVRGDRSSVSSQTP…	GbaIQD85	ATGGGGAAGAAAGGAGGGACTTCCTGGTTGACTGCTGTGAAAAGGGCTTTTAGATCTCCTACTAAAGACGGTCATGATAAGAGAAGTAACAGAAGAAAGGATGAACCTGACCACCAAGATGAGGATGAAGACAAGAAGAGAGAGAAGCGAAGGTGGATCTTCAGGAAACCCACAATTCAAGAACCGGTGATTCATCAGCAAACAACACCAGTGAAGGCTACAGGTCGTAATGGTGCAGGTGCAGCATCAGATGGTGCAACCGCAACAGCCGCAGAGCAAAGGTATGATACTCCTAGGGCAGCAACCGAGGGTGCAGCAGTGGTACAAGTGGCTCGCCCAACTAGACCTTCAAATTATGCTAGAGAGCACCACCTTGCTGCCATTGTTATTCAGACTACT…
GB_D12G1391	GB_D12G1391.1	GbaIQD86	ATGGGGATGAAAGGAGGGACTTCATGGTTGACTGCTGTGAAAAGGGCTTTTAGATCTCCTACTAAAGATACCCATGAAGATGAAAAGGTAAGTGTTTCAATCTATTTTAATGGCTGTTTATGAATCTAAAAAGAAAACCCTTTGATTTTTTTTTTATATAGAAGAGAGATAAACGGAGGTGGATCTTTAGGAAACAAAATACAAGTCCTGTGAAGAGTGTAGGTAATAATGGTGGTGGTGGTGCAAGTACGGCAGCAGCGGAGCAAAGACATGCTATTGCTGTGGCGGTGGCTAAAGCAGCTGAAGCTGAAGCTGCGGTGGCGACGGCACAAGCAGCTTTACAAGCTTCTCGGTTGACTAAACCTAGTTATGGCAGGAAACATCACTTTGCTGCTATTG…	GbaIQD86	MGMKGGTSWLTAVKRAFRSPTKDTHEDEKKRDKRRWIFRKQNTSPVKSVGNNGGGGASTAAAEQRHAIAVAVAKAAEAEAAVATAQAALQASRLTKPSYGRKHHFAAIVIQTAFRGYLARRALRALKGLVKLQALVRGHNVRKQAKMTLRCMQALAKVQSRVLDQRMRLSHDGCSRKSAFSDTNCVWESRYLQDISDRRSLSREGSSIADDWDERPHTVEEVKAMLQHRKEAALKREKSLSQALSQQMRRARRSPSMGGQDEWLDRWMPAKPWDNRGRASMDQRDNVKTVEMDTSQPYSYLAPNYRRTNSNHYHQRPSSPLHRAQHNAQPFHPSPITPSPSKTRPVQVRSASPRCVREDRTSFSSSQTPSLRSNYYYTGRVSTQASTSINNATTLPNYM…	GbaIQD86	ATGGGGATGAAAGGAGGGACTTCATGGTTGACTGCTGTGAAAAGGGCTTTTAGATCTCCTACTAAAGATACCCATGAAGATGAAAAGAAGAGAGATAAACGGAGGTGGATCTTTAGGAAACAAAATACAAGTCCTGTGAAGAGTGTAGGTAATAATGGTGGTGGTGGTGCAAGTACGGCAGCAGCGGAGCAAAGACATGCTATTGCTGTGGCGGTGGCTAAAGCAGCTGAAGCTGAAGCTGCGGTGGCGACGGCACAAGCAGCTTTACAAGCTTCTCGGTTGACTAAACCTAGTTATGGCAGGAAACATCACTTTGCTGCTATTGTTATTCAGACAGCTTTTAGAGGCTACCTGGCCAGGAGAGCTCTACGTGCGTTAAAAGGGCTAGTGAAGTTACAA…
GB_D12G2705	GB_D12G2705.1	GbaIQD87	ATGGGAAAGAACACTGCTACCTCTTGGTTGTCAATGGTGAAAAAGGCCTTTAGGTCTCCAGGTAAAGATTATGAGAAAAAGAGTAGCAGGAGAGAAGAATGTGGGCATCAGGAAGAGGATGAAAAGGTAGTATATAGTAATTAACAACTTCATCATTCTCTTGCATTTATTTTTTGTAGTATAATTTATTTAATTAAGTTGGTGGTGGGTGCATGGCTTTTTTTGGGGTTGTGCAGAAGAGGGAGAAAAGAAGATGGCTGTTTAGAAGGGGTAGTAGTAATATCAATCATGTCCAACAGTGTGAAGCAAAGATACCAACACCAACGACATCGACAAGTACTGCTACACCACCTGCGAACAATGCAGCAGAAACAGCATTGGATTTTGCAGAACAACGGC…	GbaIQD87	MGKNTATSWLSMVKKAFRSPGKDYEKKSSRREECGHQEEDEKKREKRRWLFRRGSSNINHVQQCEAKIPTPTTSTSTATPPANNAAETALDFAEQRHAIAVAAAEAAVATAQAAVEIVRLSSRPSNYANVREHYHYAAIVIQTAFRGYLARRALRALKGLVKLQALVRGHNVRRQAKLALKCMQSLVRVQDRVLDQQRARLSHEGYRRKSMFDETNALWETRYLQDIRRRKSMSRDMSCTTDEWNDRPQTSEEIEALLLTKKEAALKREKALAYAFSNQIWRSRRNPSAEDEKEVEERTKWLDRWMATKQWDNNNRVSTDKRDSIKTVEIDSYKLQSYSSPTIRRRHSLSLNQFPPTPSPCKTKPSQVRSASPRCLKEEKYYTSAANTPSLASTYCTTN…	GbaIQD87	ATGGGAAAGAACACTGCTACCTCTTGGTTGTCAATGGTGAAAAAGGCCTTTAGGTCTCCAGGTAAAGATTATGAGAAAAAGAGTAGCAGGAGAGAAGAATGTGGGCATCAGGAAGAGGATGAAAAGAAGAGGGAGAAAAGAAGATGGCTGTTTAGAAGGGGTAGTAGTAATATCAATCATGTCCAACAGTGTGAAGCAAAGATACCAACACCAACGACATCGACAAGTACTGCTACACCACCTGCGAACAATGCAGCAGAAACAGCATTGGATTTTGCAGAACAACGGCACGCAATTGCCGTTGCAGCAGCTGAAGCTGCTGTGGCAACAGCACAAGCGGCTGTTGAGATCGTTAGGCTTAGTTCTAGACCTTCCAATTATGCCAATGTTCGAGAACAC…
GB_D12G2795	GB_D12G2795.1	GbaIQD88	ATGGGAAAGAAAGGGAGTGGATGGTTCTCGACGGTGAAGAAAGTGTTCAAATCATCTCACAAAGACTTGCCTGACAAAAAAGTAACGTAATTTTTTCATCGGTTTTTAGGTTTTTTTTTTTGGCCTTTTGATGTTTGTTTAGCAGGTTGATTTGATTGCCATATTTCCAAGCAAAATCAATGGCACCTTTCAAAATTTTTTTTTCATTTTAAGGCAAATTTTTAATAAATGCAGGGAAAAAAAAAGAGAAAGCAAACATCTACATCACAAACATCTGGATTTTTGCTTGTATTTATTTGGGTTCTTATCTTTTTGTTGTTAGAACTTGGTTAACTATATAGTGCCCACGTTTGCAAGTACATTACAAATTCTCTTTGATCTTACTCATTTGTGGTCATA…	GbaIQD88	MGKKGSGWFSTVKKVFKSSHKDLPDKKRENNVEKWPNEAPDGVSFEHFPAESSPDITNNESAMSTPLNEDRNHAIAVAMATAAAAEAAVAAAQAAAKVVRLAGYGRQSKEERAATLIQSYYRGYLARRALRALKGLVRLQALVRGYNVRKQAQMTMRCMQALVRVQARVRARRLQLTDNDKIPKRSDEDYEEKKGMGEVERKPRSLLKRYDSWDGGQQSSEKVKESVSKKHDAAMRRERALAYAYSYQQQPQQQLMQPHPNGKDVGVHLNDREKAQWGWNWLEHWMSSQPYDARQLGHQEGSYMTLLTTTATTTVTDNMSEKTVEMDVVTAMDSGSYSTLQQAQSGSSNVPSYMAPTQSAKAKVRSQGPMIMKQQRVPHAPQWNPSTKKSPGCDSSSSG…	GbaIQD88	ATGGGAAAGAAAGGGAGTGGATGGTTCTCGACGGTGAAGAAAGTGTTCAAATCATCTCACAAAGACTTGCCTGACAAAAAAAGAGAGAATAATGTGGAGAAATGGCCAAATGAGGCCCCGGATGGAGTGTCGTTTGAACATTTTCCGGCGGAGAGTTCACCGGACATCACGAATAATGAGAGTGCAATGTCGACTCCTCTGAATGAAGATAGGAACCATGCCATTGCTGTCGCCATGGCAACTGCTGCTGCTGCAGAAGCAGCTGTTGCGGCAGCTCAAGCTGCCGCTAAAGTCGTCCGGTTGGCGGGTTATGGACGACAGTCTAAGGAAGAAAGAGCTGCAACGCTTATACAGTCGTATTATAGAGGCTATCTGGCTCGGAGAGCTTTGCGTGCTTTG…
GB_D13G0115	GB_D13G0115.1	GbaIQD89	ATGGGAAAGAAAAGGAGCTGGTTTAGTTGGGTGAAAAAGATTTTTGCTTCTAATGCACAACCAAAAACACAGAAGGTTCATTTTCAGTACTTGTTACTTTTCAACTTTTGCTTCTTCTTCTTCTTTTTTTTTTTTTTGANNNNNNNNNNNNNNNNNNNNNNNNNNNNNNNNNNNNNNNNNNNNNNNNNNNNNNNNNNNNNNNNNNNNNNNNNNNNNNNNNNNNNNNNNNNNNNNNNNNNNNNNNNNNNNNNNNNNNNNNNNNNNNNNNNNNNNNNNNNNNNNNNNNNNNNNNNNNNNNNNNNNNNNNNNNNNNNNNNNNNNNNNNNNNNNNNNNNNNNNNNNNNNNNNNNNNNNNNNNNNNNNNNNNNNNNNNNNNNNNNNNNNNNNNNNNNNNNNNNN…	GbaIQD89	MGKKRSWFSWVKKIFASNAQPKTQKKSRRWRWIFGKLKLKQCRPALPAIPQQKSLCQATEDQRKHALNLAIATAAAAEIAVAAAQAAAEVVRLANASNHFSNFTTKDRNRAAIKIQTAFRAHLARKALRALKGLVLLQAIIRGQVTRRRAMKNMKCLQSGTEMYPEIKEKVICQDTRRNQSLVHKDQLQVKDIIEHEYYSRRNWNDSVFSKEDAEAVWLRRQEAMAKRERMKKYSYSHRERVNSYMLDESVHVKETGRNSFLEAEANSEGTRRERMMILKHNVASNSSTWKVDGLHGLNSPYLFPRRSFCRVQNQNPAGNESSVPSSPVFPTYMAATESAKAKVRSMSTPRQRLGLSDTCFDHNMPYKGGLSLWSTYNGETFKYQ	GbaIQD89	ATGGGAAAGAAAAGGAGCTGGTTTAGTTGGGTGAAAAAGATTTTTGCTTCTAATGCACAACCAAAAACACAGAAGAAATCAAGGAGGTGGAGATGGATTTTCGGAAAACTAAAGCTCAAGCAATGCCGCCCTGCATTACCGGCGATACCCCAGCAGAAATCGTTATGTCAAGCAACCGAGGATCAAAGAAAGCATGCTTTGAATCTTGCCATTGCGACAGCTGCTGCAGCTGAAATTGCGGTTGCTGCAGCACAAGCGGCAGCCGAGGTCGTTCGTCTGGCTAATGCCTCTAACCATTTCAGTAATTTCACAACAAAGGATAGGAACCGAGCTGCTATTAAGATCCAAACCGCTTTCCGGGCACATCTGGCAAGGAAAGCCCTACGGGCACTAAAGGGA…
GB_D13G0761	GB_D13G0761.1	GbaIQD90	ATGGGAAAATCTCCAGCAAAATGGATCAAGACCTTACTTCTTGGGAAGAAATCTTCAAAGTCCAGTTTCTCAAAAGAAAAAGAGAAGCTGGTGAGGAAGTACTAATTATCTTCAAATATTAAATAGCTCTTGAAATGTTGCATTTTCTAATTTTGTTGATTATTATGTTCAGAAATCTGCAAATAAAGGTGAGGTTTTGGTTTCTTCCAAGGTGACTGTGTCTGACCTATCAGTGGATCCTCCATCAATTTCAGCACCTATTCTAGTGAATAGCGCTAGGAATGTGGTGGACTCTGAGAAGGGTATACCTGCGCAATTGCCGAATGATGGGGCAAATATTCCATCTCCAAAAGTGGATGGAAATGATGCCACAACTGGTAATTTTGGTAACCCAGAAAA…	GbaIQD90	MGKSPAKWIKTLLLGKKSSKSSFSKEKEKLKSANKGEVLVSSKVTVSDLSVDPPSISAPILVNSARNVVDSEKGIPAQLPNDGANIPSPKVDGNDATTGNFGNPENPDRIRLDPAAVMVQAAFRGYLARRAFRTLKGIIRLQAVIRGHLVRRQAVATLCCTWGIVKLQALARGQKVRCSDIAMEIQEKHLRLLQGSKSSDSIGVSTSSKVKNLSNNVFVQKLLASSPSVLPLQLQYVPEEPNSSWQWLQRWTMSHFWLSPLKPVRSGKTKRSIQKLSNAKVVNGSSHSTLEHEKNKRGLRRVSGNSAADSVRKHPQNELERVKRSLRKLSDSSKEVSDKSEVFNEKTKKTLKKTSNSNDPDFSEQESAEKIRDVAATLSELSILEADMKMSSEDPSLGE…	GbaIQD90	ATGGGAAAATCTCCAGCAAAATGGATCAAGACCTTACTTCTTGGGAAGAAATCTTCAAAGTCCAGTTTCTCAAAAGAAAAAGAGAAGCTGAAATCTGCAAATAAAGGTGAGGTTTTGGTTTCTTCCAAGGTGACTGTGTCTGACCTATCAGTGGATCCTCCATCAATTTCAGCACCTATTCTAGTGAATAGCGCTAGGAATGTGGTGGACTCTGAGAAGGGTATACCTGCGCAATTGCCGAATGATGGGGCAAATATTCCATCTCCAAAAGTGGATGGAAATGATGCCACAACTGGTAATTTTGGTAACCCAGAAAATCCTGATAGGATTAGGCTTGACCCAGCTGCTGTGATGGTACAGGCTGCTTTCAGAGGTTATCTGGCTCGCAGGGCATTTCGA…
GB_D13G0763	GB_D13G0763.1	GbaIQD91	ATGGGGAAATCTCCAGCGAAATGGATCAAGACCTTGCTTCTTGGGAAGAAATCTTCAAAGTCCAGTTTCTCAAAAGGAAAAGATAAGCTGGTAAGGAAGTATTAATTATCTTCAAATGTTAAATAGCACTTGAAGATTGAAAATGTTGCATTTTCTAATTTTTGTTGATTATCATGGGCAGAATTCTGCAAATAAAGGTGAGGTTTTGGTTTCTTCCAAGGTAACTGTGTCTGACCTATCAGCGGATTCTCCATCGATTTCAGCACCTATTCTAGTGAGCCGTGCTAGGAATGTGATGGACTCTGAGAAGGGTATACCTGCCCAATTGCCGATTGATGGGGAAAATATTCCATCTCTAAAAGTGGATGGAAATAATGCCACAACCGGTAATTTTGGTAA…	GbaIQD91	MGKSPAKWIKTLLLGKKSSKSSFSKGKDKLNSANKGEVLVSSKVTVSDLSADSPSISAPILVSRARNVMDSEKGIPAQLPIDGENIPSLKVDGNNATTGNFGNPENPDRIRLDPAAVTVQAAFRGYLARREFRILKGIIRLQAVIRGHLVRRQAVATLCCTWGIVKLQALARGQKVRCSDIAMEIQEKHLRLLQGLKSSNSVGASISSTVKNLSSNVFVQKLLASSPSVLPLQLQYVPEEPNSSWQWLQRWTRSQFWEYPSKPIRSGKTKLSVQKLSFAKAVNGSSHSTLEYEKNKRGLRRISVNSAADSVREHPQNELERVKRNLRKLSNSSKEVTDKSEFVNEKTKKTLKKYSSSNGPDVLEQESAEKIRDVTATLSELSILEADLKFSSEHASLGE…	GbaIQD91	ATGGGGAAATCTCCAGCGAAATGGATCAAGACCTTGCTTCTTGGGAAGAAATCTTCAAAGTCCAGTTTCTCAAAAGGAAAAGATAAGCTGAATTCTGCAAATAAAGGTGAGGTTTTGGTTTCTTCCAAGGTAACTGTGTCTGACCTATCAGCGGATTCTCCATCGATTTCAGCACCTATTCTAGTGAGCCGTGCTAGGAATGTGATGGACTCTGAGAAGGGTATACCTGCCCAATTGCCGATTGATGGGGAAAATATTCCATCTCTAAAAGTGGATGGAAATAATGCCACAACCGGTAATTTTGGTAACCCAGAAAATCCTGATAGGATTAGGCTTGACCCAGCTGCTGTGACAGTACAGGCTGCTTTCAGAGGTTATCTGGCTCGCCGGGAATTCCGA…
GB_D13G1069	GB_D13G1069.1	GbaIQD92	ATGGGGAAGAAAGGAAAATGGTTGTCTTCTCTAAAGAAAGCCTTCACCCCAGAATCCAAGGAAAAGAAAACCCAGGTCTGAAAGAAGTCCAATTCAGCTATAAATTACCCACAGTTTATTAGTCCTCAATGAGTGTTTTTAATTTTCTTTATTGCTATGTTTTTTTTTCAGAAATCCAAAGAACAGGTTTTGGGAAAGCAAGTGGATTTGGGTTCCAATGATTCTGATGCAGCCACTTTAGAAACTCTCAACTTGTCCCCTCCTCCCCAGCCACAGAAGGTGAAATTAATCGAAGCCGAGGCTGAACCGAGCGAGCAAACTTACCCTGTGGAAGTTGCTATTGCTGCTGCTGCTGCTGTGGCTTTGGCCGCTCCAGCTGAGGCAGTTGCGGATGTCGTT…	GbaIQD92	MGKKGKWLSSLKKAFTPESKEKKTQKSKEQVLGKQVDLGSNDSDAATLETLNLSPPPQPQKVKLIEAEAEPSEQTYPVEVAIAAAAAVALAAPAEAVADVVRRQSNTGPRFAGKSNEEVAAIKIQTAFRVYLAKRALHALRGLVRLKSMMEGPMVKRQAAGTLRCMQTISRVQCQIRLRRIRMTEENQALQRQLLQKHAKEIVNLQMGEDWDDSLQSKEQIEASLLSKHEASMRREKAMAYSFTHQQTWKNASRSMNPLFMDPNNPSWGWSWLERWMAAWPWEGRGMAEKEQNNDQSSVKSGRSSFGGDISKAYARYQLNLDKQSLKASQKPSRTSSLQSPSTPKPVSTLTRKLKSPSPRSSVVAPDDDMRSTVSVLSERNRRHTIGGSSVLDDESLAS…	GbaIQD92	ATGGGGAAGAAAGGAAAATGGTTGTCTTCTCTAAAGAAAGCCTTCACCCCAGAATCCAAGGAAAAGAAAACCCAGAAATCCAAAGAACAGGTTTTGGGAAAGCAAGTGGATTTGGGTTCCAATGATTCTGATGCAGCCACTTTAGAAACTCTCAACTTGTCCCCTCCTCCCCAGCCACAGAAGGTGAAATTAATCGAAGCCGAGGCTGAACCGAGCGAGCAAACTTACCCTGTGGAAGTTGCTATTGCTGCTGCTGCTGCTGTGGCTTTGGCCGCTCCAGCTGAGGCAGTTGCGGATGTCGTTCGTCGTCAATCCAACACAGGTCCTCGGTTTGCTGGAAAATCTAATGAAGAAGTGGCAGCTATCAAAATTCAAACCGCTTTCCGAGTTTACCTTGCA…
GB_D13G2053	GB_D13G2053.1	GbaIQD93	ATGGGAAAGGCAAGCAAATGGTTAGTAAACTTCTTGCTAGGGAGAAAAGATGATAAAGGAAAAAGGAAGAATTTGTCCATATCTTTTGATGAAGAGAATTTGGTTTCATCCCCGTCTGCAACTCCATCGTCCGCATCTTCGTTTAAGCGGAGATGGAGTTTTGGGAAGTTGTCGAGTAAAGATCGAGCTCATAAGAGTTCCCGGTCACTTGACTCAATGACTGCAACTCCACTTTTGAAGCAAGCTGTATTCAATATGGAGATCCGGCATGATAACACGAGGGTTTTCACAATGGCCATGATGAATTCTAGCAGAAGGAAAACAAAAGCAAGATATGCAGCAGTGGAAAATGCGGCAGCGACCCAGATTCAAGCCGCTTTTCGTTCGTATTTGGTAATG…	GbaIQD93	MGKASKWLVNFLLGRKDDKGKRKNLSISFDEENLVSSPSATPSSASSFKRRWSFGKLSSKDRAHKSSRSLDSMTATPLLKQAVFNMEIRHDNTRVFTMAMMNSSRRKTKARYAAVENAAATQIQAAFRSYLARKALHALRGLVKLQALVRGYLVRKQTTATLRSMHALMSIQVRARFQRIQMADQSQLDVKSQSLRYGRFLQEMEFKRSQREGINEKHGPVKSQNGLMNHSQMERIEQGIIKYYSGELPILKRQLKHEEFSFTTHNSPRHSPPMSKVTPARSSFSSHDYPYMPSYMANTQSSRAKLRSQSEPRQRPALNFKAKGKRITSAEEMDDDILPRYSFSQSKGVADEHQDPWIVKLYQSTITPKMDTSSYK	GbaIQD93	ATGGGAAAGGCAAGCAAATGGTTAGTAAACTTCTTGCTAGGGAGAAAAGATGATAAAGGAAAAAGGAAGAATTTGTCCATATCTTTTGATGAAGAGAATTTGGTTTCATCCCCGTCTGCAACTCCATCGTCCGCATCTTCGTTTAAGCGGAGATGGAGTTTTGGGAAGTTGTCGAGTAAAGATCGAGCTCATAAGAGTTCCCGGTCACTTGACTCAATGACTGCAACTCCACTTTTGAAGCAAGCTGTATTCAATATGGAGATCCGGCATGATAACACGAGGGTTTTCACAATGGCCATGATGAATTCTAGCAGAAGGAAAACAAAAGCAAGATATGCAGCAGTGGAAAATGCGGCAGCGACCCAGATTCAAGCCGCTTTTCGTTCGTATTTGGCAAGG…
GB_D13G2250	GB_D13G2250.1	GbaIQD94	ATGGGTTCTTCAGGGAAATGGGTGAAATCTCTTATGGGTGTCAAGAAGAATGAAAAAGAAGACCAAGTAAGCTTCGGGTTTTTTCCTGCTTTGTTGCACAGCTACTATTATTTACATTTCTTCACTAAAGCTTTCTGTTATGCAGGAAAAAATGGGTGTCAAGAGTAAGAAATGGAAGCCATGGGGCTCTAAAGGGAAGTTCAGATCAGATTCTTCACCAAGGACTGCTGCAATGGCAGCACTAGCCCGAGCTCCTGCTAAAGATTTCAGGGTTTTAAGGCAAGAAGGGGCTGCCATCCGCATCCAAACTGCTTTTCGTGGTTTCTTGGTAAATTGCAAACACCCTTTTCAGTCTCATATTTTTTTCATTTCTTTCATTGTTTGGTGTCCGTGAAAATG…	GbaIQD94	MGSSGKWVKSLMGVKKNEKEDQEKMGVKSKKWKPWGSKGKFRSDSSPRTAAMAALARAPAKDFRVLRQEGAAIRIQTAFRGFLARRALRALKGIVRLQALVRGRQVRKQATITLRCMQALIRVQARVRARRVRMSTEGRAVQKMLDECHSKDDILKQAEDGWCDSKGTLEDVKTKLQMKQEGTFKRERALAYSLAQKQWRSKPSSTNQTNSSGLYTKYQEFDENSWGWSWLERWMAARPWETRLMEPSQAPPSKHCLEGKNARSSSPCFVEVGKNNISTRISAKPPCIGQVTHSSSSPSSEFRFNPSSASSSICRSSTPVSGNTTLSSTDRTEQSGNSRPDYMNLTESTKAKQRPRNNPVHMSRPLYPNTNAGNRYV	GbaIQD94	ATGGGTTCTTCAGGGAAATGGGTGAAATCTCTTATGGGTGTCAAGAAGAATGAAAAAGAAGACCAAGAAAAAATGGGTGTCAAGAGTAAGAAATGGAAGCCATGGGGCTCTAAAGGGAAGTTCAGATCAGATTCTTCACCAAGGACTGCTGCAATGGCAGCACTAGCCCGAGCTCCTGCTAAAGATTTCAGGGTTTTAAGGCAAGAAGGGGCTGCCATCCGCATCCAAACTGCTTTTCGTGGTTTCTTGGCAAGAAGAGCTTTGAGAGCTTTAAAAGGAATCGTGAGGCTTCAAGCATTAGTTCGCGGCCGACAGGTGAGGAAACAGGCCACCATAACGCTTCGGTGCATGCAAGCTCTCATTCGTGTCCAAGCTCGTGTTAGAGCTCGTCGTGTGCGG…

## Sheet: Ghi
Genome Wide Identification, Classification and Functional Characterization Analysis of IQD gene family in Diploid and Tetraploid Cotton (Gossypium) Abdul Rehman1,2,3, Zhen Peng2, Hongge Li2, Guangyong Qin1, Yinhua Jia2，Zhaoe Pan2，Shoupu He1,2, Abdul Qayyum3 and Xiongming Du1,2*, 1Zhengzhou Research Base, State Key Laboratory of Cotton Biology, Zhengzhou University, Zhengzhou 450000, China. 2State…
Gene ID	Principle Transcript ID	Rename	Genomic	Rename	Proteins	Rename	CDS
GH_A01G0547	GH_A01G0547.1	GhiIQD01	ATGGGTTCAGGAAACTGGCTTAGATCATTCATTTGTTTAAAGAAATATAAACCAAACAGATCCAAACAAGCAAAGGTAGTACATGTGTTTTGGAATGACGCATTAATCCAACATATTGCTCGTGTTAGACACTGCATATCACTAATATGGTCACAGACCCCATCAATACAGGTACACTCGAGTAATGAAAAATCAAATGGTGATGAAAGGGTAGAAGAACATGAGGGTCCTGAAGTGGCAGCGGCTGGGAGTTCACAAAGCAGTCCTGGAATTGCCGTTGAACAAAGAGCGGCTGCTAAAATTCAGAAGGCATTTCGGTCTTACAGGGTATTTTTAATTTTTTGCCAAATTCCAATTTCATACATATTTCCAAGTGGAATTACCTTTTAAGAGATCAAA…	GhiIQD01	MGSGNWLRSFICLKKYKPNRSKQAKTPSIQVHSSNEKSNGDERVEEHEGPEVAAAGSSQSSPGIAVEQRAAAKIQKAFRSYRARKAVRRLRDAGRFKNILIQGHTVKKQTRSTLSYLHSWCNVQSQIRARRICMVTEGRLKQKKMENQMKLEAKLHELEVEWCGGSETMEEILSRIQQREEAAVKRERAMAYAFSHQWRANASQYLGQASYGAGKENWGWSWIERWIAARPWEVRIHSQPIHPKKTHGRQASKSEKEMKVSASVKPCLPNGKVAPKAKNGAPSDG	GhiIQD01	ATGGGTTCAGGAAACTGGCTTAGATCATTCATTTGTTTAAAGAAATATAAACCAAACAGATCCAAACAAGCAAAGACCCCATCAATACAGGTACACTCGAGTAATGAAAAATCAAATGGTGATGAAAGGGTAGAAGAACATGAGGGTCCTGAAGTGGCAGCGGCTGGGAGTTCACAAAGCAGTCCTGGAATTGCCGTTGAACAAAGAGCGGCTGCTAAAATTCAGAAGGCATTTCGGTCTTACAGGGCAAGAAAAGCAGTCCGCCGGCTGAGAGATGCGGGGAGATTCAAGAACATATTGATACAGGGACATACAGTGAAGAAACAAACAAGAAGCACGCTAAGCTATTTACATTCATGGTGCAATGTCCAGTCTCAAATCCGAGCTCGGAGAATATGT…
GH_A01G1101	GH_A01G1101.1	GhiIQD02	ATGGGAAAATCCACTTCCTGTTTCAAACTCATCACTTGCGGCAGCGATTCCGCTGAAAAAGACGACGCCATTGATGTCCCTGAGGTAAATTACGGCTGCATTTTCCCCCTTTTTTTTGTTACTTTGCTTTGAATTAGTATTTCATCTGCTGTTTCGAATTGCATTTCACCTTTTAGTTTAATTTTTGGATTTGGTCGAGGAATGGGAGTTTGAAAACTTGTCTTACACCAGAATTTTAAGATCTGAGAATTCCTGCCTTAGCATTTTTTATCAGCAATGTCCAAGCTGCCTTTTTTAACTCTGATTATTTTCCATAATTTTTTAAATGCAAATAGTTTTCTCGGTATCAAGTTTCGAAACTCTCAAAGGTTTTTAAAATTTATCTTCTTTTAACTGGTT…	GhiIQD02	MGKSTSCFKLITCGSDSAEKDDAIDVPENKRSSDKKGWSFRKRSERHRVLSNSVIQVTTTTGLKESQDSDGFEFQQQDVSVASEKTSTVQYTEEKPQLMTPKEYIEEKSQLVALKEYTEEKSHSLTPIELAEEKSQLLAPIKCTEEKSQLTPEPAESKVPEPITATTNEAEDDFSLDESVVVIIQTAIRGFLAQKELGKLKNLVKLQAAVRGHLVRRHAVGTLRCVQAIVKMQLLVRARQSQEGSYVEKLDGKHQEVNQRLQGNSATKKNLTYNSMEKLLSNRFARQLMDSTPKTKTIHFKCDSSKPNSAWSWLERWMSVSSSEKASKAELPIEQPEQKNTEDCDSPRTPAVPSENISASNEPKPHVRETMVSSESEDNLITHDAANFKFEACQASSSS…	GhiIQD02	ATGGGAAAATCCACTTCCTGTTTCAAACTCATCACTTGCGGCAGCGATTCCGCTGAAAAAGACGACGCCATTGATGTCCCTGAGAATAAGAGATCAAGTGACAAAAAGGGATGGAGTTTTCGGAAGAGATCTGAACGGCATCGAGTGCTTAGCAACTCTGTGATACAAGTAACTACCACTACAGGACTTAAGGAAAGTCAAGACTCTGATGGTTTTGAGTTTCAACAGCAAGATGTCTCGGTTGCTTCTGAGAAAACCTCCACTGTTCAGTACACTGAAGAGAAACCTCAGCTGATGACACCAAAAGAGTACATTGAAGAAAAATCCCAGTTGGTGGCACTGAAAGAGTACACAGAAGAAAAATCTCACTCGCTGACGCCTATAGAACTTGCTGAAGAA…
GH_A01G2332	GH_A01G2332.1	GhiIQD03	ATGGGGAAGAAAGTAAAATGGCTATCTTCTTTAAAGAAAGCCTTCAATCCAGAGTCAAAGGAAAAGAAAAATCAGGTTTGAAAATTTTCAATTCAGTCCATAATTCATGTTAAATTTCTGGTCAACCCACATGTACTTAAATTTTTATGTTTTCTTTGGGGTCAATTTGTGATTTTGATCCTTTTGTTATACTGAAATTTGAGATTTGTTTAATTTGGTATAAGGCGTCGATTATTTAGACTAATGAGATTATAAAAGGTTAAAGTACCTAGGAAGTCCCTGTATTATAGGGGCTGGATCAAATTCGTCCCTCTATTGTTAAATGAATTAATTGAGTCCCTATACTATTACAAAGAATCAAATGATACCAAAAAAAATGTCTTAAATTTTCTTTTCAAT…	GhiIQD03	MGKKVKWLSSLKKAFNPESKEKKNQILDKQVHLGPSSSNAAAPTLETVNLSPPPQPEDEKIIKPETVAEATDDDVVVAPAVPTPAAVTVVQRRLNIDSRFAGKSMEEVAAIKIQTAFRVYMAKRALCALRGLVRLKSLMEGPAVKRQVTSTLRCMQTLSRVQCQIRMRRIRMTEENQALQRQILQKHAKELVNLQMGEDWDDSLQSKEQIEASLLSKHEAAMRRERAMAYSFTHQQTWKNGSKSMNPLFMDMNNLTWGWSWLERWMAARPWEGRGVTGKEPNNDQSSVKSAHFEGEISKAYARYQLNLDNKQSPKSSQKPNRTSSHLSPSPKPPSTPSPKLKSASPSGSIIAQDDDTRSIVSAQSERNRRHSIAGSLVRDDESLASSPSLPSYMVPTKS…	GhiIQD03	ATGGGGAAGAAAGTAAAATGGCTATCTTCTTTAAAGAAAGCCTTCAATCCAGAGTCAAAGGAAAAGAAAAATCAGATTTTGGATAAGCAAGTGCATTTGGGTCCTAGTAGTTCTAATGCGGCTGCACCCACATTAGAAACTGTTAATTTGTCCCCTCCACCTCAGCCGGAAGATGAGAAAATAATCAAACCCGAGACGGTTGCTGAAGCTACCGATGATGATGTTGTTGTTGCTCCAGCTGTTCCGACCCCGGCTGCTGTTACGGTCGTTCAACGCCGACTTAATATAGACTCTCGGTTTGCTGGAAAATCTATGGAGGAAGTTGCAGCGATCAAAATTCAGACAGCTTTTCGAGTTTACATGGCGAAAAGAGCATTGTGTGCTTTACGAGGACTTGTG…
GH_A02G0100	GH_A02G0100.1	GhiIQD04	ATGGGAAAGAAAGGAAGTTGGTTTTCTGCAATCAAAAGAGTTTTCGTATCGAATTCGAAGGGGAAGCTAGATATTGTAAGTCGGTATTTCGATGTTTTTAAGGTTGAAGTCGGTTTTGTTATGTATGTGACCTATTGAGATTTATATCCTAATAGATTGTTATGCAGCATGTATGTCGTAAAATCGGAATATTTACGGCTTGTTTTGTTTCGATGAATCGTTTTAGGAATCGGACAAAAAGGGCGGTAAAGAAAGGAAGAAGAAAGGTCAAGCAAATTACAAGCATGGAGAAGCTAATTCCTTCATTCCCCTGTTTAGGGAACCGAGTAGTATCGAGAAAATTCTCGGGGAGGCTGAAAGAGATCGGAAACTATCGTTCCGGCCTTCAACACCACCGGA…	GhiIQD04	MGKKGSWFSAIKRVFVSNSKGKLDIESDKKGGKERKKKGQANYKHGEANSFIPLFREPSSIEKILGEAERDRKLSFRPSTPPDQLRTPPFMLPRAASPRVRSQRIASPRAASPKTASSPRANSPRAASPFLPPPPRAASPRAGPPRLVRPRLEPTLRNHHASATKIQAAYRGYMARRSFRALKGLVRLQGVVRGHNVKRQTITAMKYMQLLVRVQSQIQSRRIQMLENQARRQAQFKNDKEADIGKLTFGQSETGNENWDDSLLTKEEIEARMQRKVEAVIKRERAMAYAYSHQLWKDAMKSPHTGVPNIRSGVFPWWWNWLERRLPPTDLPENQATKTFQFTPRPNSELKPSPRPQSSQFTFDNIIDIPTPKSTRSTILPTTRPMQTPTPPSKLVPQA…	GhiIQD04	ATGGGAAAGAAAGGAAGTTGGTTTTCTGCAATCAAAAGAGTTTTCGTATCGAATTCGAAGGGGAAGCTAGATATTGAATCGGACAAAAAGGGCGGTAAAGAAAGGAAGAAGAAAGGTCAAGCAAATTACAAGCATGGAGAAGCTAATTCCTTCATTCCCCTGTTTAGGGAACCGAGTAGTATCGAGAAAATTCTCGGGGAGGCTGAAAGAGATCGGAAACTATCGTTCCGGCCTTCAACACCACCGGATCAACTTAGAACACCACCTTTCATGCTTCCTAGGGCTGCGTCTCCTCGTGTTCGTTCTCAAAGGATTGCCTCACCAAGGGCTGCTTCTCCGAAGACTGCTTCTTCTCCACGAGCCAATTCACCTAGAGCTGCTTCTCCGTTTCTGCCTCCA…
GH_A02G1393	GH_A02G1393.1	GhiIQD05	ATGGGGAAGACTACAAGGTGGCTCAAGTCAGTTTTAGGCATGAAAAAGGAAAAAGAAAAAACCCCCATTCAGCATTCTGTTTTATACGACAAGAATGACAAGAAAACGTGGAGTTTTGCCAAGTCCGGGAAAGATGTCGACGCAAATTCTCAAACCCCATCGGCCGTCACTGATGCCGCTTGGCTTAGGTCCTACTTTGCCGAAACCGAGAAAGTGCAGAACAAACATGCCGTTGCTGTGGCTGCTGCTACAGCAGCTGCAGCCGATGCAGCTATGGCAGCAGCACAAGCTGCCGTCGCAGTCGTCAGGCTGACCAGCAATGCTAGAGCTTCTTTCTTGGCTGGAGGGAAGGAGAAGTGGCCAGCTGTTAAAATTCAAGCCGCCTTTAGAGGTTACTTG…	GhiIQD05	MGKTTRWLKSVLGMKKEKEKTPIQHSVLYDKNDKKTWSFAKSGKDVDANSQTPSAVTDAAWLRSYFAETEKVQNKHAVAVAAATAAAADAAMAAAQAAVAVVRLTSNARASFLAGGKEKWPAVKIQAAFRGYLSRKALRALKGLVRLQALVRGYLVRKRAAATLHSMQALIRAQSAVRSQRMRRSFNKENRYHPENQPRKSIERFDEWRSEINAYDDNPKIIEIDTLKSRSRSHRFNTALSECGDDLPYQTISSPLPRLVPPRTSLPHYQNLNDFEWCFSGGDECRFATAHNTPRFGNAGRSNAPTTPTQSVCGDGYFKPYSNFPNYMTNTQSFKAKLRSYSAPKQRPESGGAKKRLSHNEIMAARNSISGVRMNKSYYQIHHQF	GhiIQD05	ATGGGGAAGACTACAAGGTGGCTCAAGTCAGTTTTAGGCATGAAAAAGGAAAAAGAAAAAACCCCCATTCAGCATTCTGTTTTATACGACAAGAATGACAAGAAAACGTGGAGTTTTGCCAAGTCCGGGAAAGATGTCGACGCAAATTCTCAAACCCCATCGGCCGTCACTGATGCCGCTTGGCTTAGGTCCTACTTTGCCGAAACCGAGAAAGTGCAGAACAAACATGCCGTTGCTGTGGCTGCTGCTACAGCAGCTGCAGCCGATGCAGCTATGGCAGCAGCACAAGCTGCCGTCGCAGTCGTCAGGCTGACCAGCAATGCTAGAGCTTCTTTCTTGGCTGGAGGGAAGGAGAAGTGGCCAGCTGTTAAAATTCAAGCCGCCTTTAGAGGTTACTTG…
GH_A02G2016	GH_A02G2016.1	GhiIQD06	ATGGGCACTGCTAGAAACTGGTTCAACACAGTTAGAAAGAAGTTCATCAAATCATCCCACCAAAGAGATATCGTCATCCCTCATAGCGAAAATCTCAGCCAGCAGTCAATGATCAAAGAAGTTAGAGACTTCCCCAACATTTCACCTTCATCGAGATCATCATTTCAGACAAAAAATTTAACCAGAGAGGATATTGCAGCAATTAAGATCCAATCAGTTTTCAGGGGTCATCTTGTAACTACGATAACTTATATTTCTTTTTCAAACACTTTAGATGTAAACTAACCATTTCGTGTTCTCGAATGATGGACAGGCAAGACGAGCATATAGAGCATTGAGAAGCCTGGTTAAGCTGCAAGCAGTGGCCCGAGGGGCGTATGTAAGGAAACAAGTACAAAT…	GhiIQD06	MGTARNWFNTVRKKFIKSSHQRDIVIPHSENLSQQSMIKEVRDFPNISPSSRSSFQTKNLTREDIAAIKIQSVFRGHLARRAYRALRSLVKLQAVARGALQVKVRARQLLAGTVSDRRCS	GhiIQD06	ATGGGCACTGCTAGAAACTGGTTCAACACAGTTAGAAAGAAGTTCATCAAATCATCCCACCAAAGAGATATCGTCATCCCTCATAGCGAAAATCTCAGCCAGCAGTCAATGATCAAAGAAGTTAGAGACTTCCCCAACATTTCACCTTCATCGAGATCATCATTTCAGACAAAAAATTTAACCAGAGAGGATATTGCAGCAATTAAGATCCAATCAGTTTTCAGGGGTCATCTTGCAAGACGAGCATATAGAGCATTGAGAAGCCTGGTTAAGCTGCAAGCAGTGGCCCGAGGGGCGTTACAGGTCAAGGTTCGTGCCCGCCAACTCCTCGCAGGTACAGTGAGTGACCGCCGATGCAGCTAG
GH_A03G0236	GH_A03G0236.1	GhiIQD07	ATGGGTAAAGCTTCCAAGTGGTTCCGCAGCATCCTCGGCTTCAAAAAATCCGAACCCCATAACCAACCTTCTTCTTCTTCAAAACCAACTTCCCATAAAGACAAACGGCGTTGGAGTTTCGTCAAATCGTACCGTGAAAAAGACTCCTCCACGAACAGTAGTAATGGGAAGTTGCCGTCGTCTTCGCAGCAACTGAAAGATTCTGTTTCCTTCGTTGAAAGGAAAGGTGACAATGAAGTAACGGATCCTAGCAAGCACGCCATCGCTGTTGCTGCCGCCACTGCCGCCGTTGCCGAAGCAGCCGTTGCGGCTGCTCAAGCTGCCGCTGCAGTGGTTAGGCTCACTAGTAACGGTGGTAGGTGCGCTCGTGAATCGGCAGCGGTTCACGTTTGCAACAAC…	GhiIQD07	MGKASKWFRSILGFKKSEPHNQPSSSSKPTSHKDKRRWSFVKSYREKDSSTNSSNGKLPSSSQQLKDSVSFVERKGDNEVTDPSKHAIAVAAATAAVAEAAVAAAQAAAAVVRLTSNGGRCARESAAVHVCNNNSYIAHEESSAIKIQSAFRGYLARRALRALKGLVRLQALVRGHIERKRTAEWLRRMQALLRAQARARAGRAQISESSQSSCKSSHFHHPDPATPEKFEHVSRSQGTKYEQSSMLKRNGSKSSGRTVDNQEKLHSGWYCRVDEQTWVHSTRIGPNDDEKNDKILEVDTGKPNFISKRRNLFHSTHLSLNSDLYSCSFTNSRDSHQTAPSPSSGEVQSLTPLMLSHSEAIQESPFCDAVDDNSPQFYSASSKGASSKRSPFTPAKSDG…	GhiIQD07	ATGGGTAAAGCTTCCAAGTGGTTCCGCAGCATCCTCGGCTTCAAAAAATCCGAACCCCATAACCAACCTTCTTCTTCTTCAAAACCAACTTCCCATAAAGACAAACGGCGTTGGAGTTTCGTCAAATCGTACCGTGAAAAAGACTCCTCCACGAACAGTAGTAATGGGAAGTTGCCGTCGTCTTCGCAGCAACTGAAAGATTCTGTTTCCTTCGTTGAAAGGAAAGGTGACAATGAAGTAACGGATCCTAGCAAGCACGCCATCGCTGTTGCTGCCGCCACTGCCGCCGTTGCCGAAGCAGCCGTTGCGGCTGCTCAAGCTGCCGCTGCAGTGGTTAGGCTCACTAGTAACGGTGGTAGGTGCGCTCGTGAATCGGCAGCGGTTCACGTTTGCAACAAC…
GH_A04G0950	GH_A04G0950.1	GhiIQD08	ATGGGAAAGAAAGGGAAATGGTTGTCCTCTCTAAAGAAAGCCTTCTTCTCAGAGTCCAAGGGAAAGAAAACCAGGTTAGGATAAGTCTCGTTCAGCTAAAAATCATCTGCAGTTTCATGGTTAGCTCAGTTTTTAGTATTCTTGATTACTATGTTTCTCAGAAATCAAAAGAACTTTTTTGGAGAAGAAGGTGCATCTGGATCCCACTGGTTCTGATGCAGCCAAGTTATCCCCACTTCCTCAGCCTGAAGAGGTGAAATTAATTGAACCTGAAGTTGAGCAAAGCAAGCAGACTTACCCTGTGGCAGTTGCCAATTCTGCTGCGGTTCAAGCTCTGGTTGCTCTGCAGGCCATTCGACATCAACTTAATACAGATGCTAGGTTTGCCGGAAAATCTAA…	GhiIQD08	MGKKGKWLSSLKKAFFSESKGKKTRTFLEKKVHLDPTGSDAAKLSPLPQPEEVKLIEPEVEQSKQTYPVAVANSAAVQALVALQAIRHQLNTDARFAGKSKEEVAAIKIQAAFRAYLAKRALRALRGLARLKSLMEGIAARRQASGSLRCMQTLSRMQCQIHARRTRMMEENQALQRQLLQKLAKEIVNLQMGEDWDDSVRSKEQIEASLLSKHEAAMRRERTMAYSFTHQQTWKNASRSMNPLFMDPSNPSWGWSWMERRMTARPWEVRGGMRHREHLDDQSSLKSARSNFGGEISKAYARYQLNLDKQSPKANQKPSRTSSLLSPSTPKSASIPARKLKSASPRSGVAGLDDETRSIVSMKSDRNRRHSIAGSSVRDNESLANSPSLPSYMVPTKSA…	GhiIQD08	ATGGGAAAGAAAGGGAAATGGTTGTCCTCTCTAAAGAAAGCCTTCTTCTCAGAGTCCAAGGGAAAGAAAACCAGAACTTTTTTGGAGAAGAAGGTGCATCTGGATCCCACTGGTTCTGATGCAGCCAAGTTATCCCCACTTCCTCAGCCTGAAGAGGTGAAATTAATTGAACCTGAAGTTGAGCAAAGCAAGCAGACTTACCCTGTGGCAGTTGCCAATTCTGCTGCGGTTCAAGCTCTGGTTGCTCTGCAGGCCATTCGACATCAACTTAATACAGATGCTAGGTTTGCCGGAAAATCTAAGGAGGAAGTGGCGGCAATCAAAATTCAAGCAGCTTTCCGAGCTTACCTTGCAAAAAGGGCATTGCGTGCTTTAAGAGGACTGGCTAGGTTGAAATCA…
GH_A05G0263	GH_A05G0263.1	GhiIQD09	ATGGGGAGAGCTTCAAGGTGGCTGAAGAGCTTGTTTGGGATAAAGAACAGCAAAAACAGCTTCAATCCCAGAGACGGGAAAGACAAGAAAAACGGCAGCATTGACCATTCAGTGGGTGATTCAAGCATTTCCCCAGAAAAGGTTGCGTGGTTAAGATGGTGCTATAATGAAACAGAGAGGGAGCAGAACAAGCACGCCATTGCTGTGGCTGCCGCCACTGCTGCTGCGGCGGATGCAGCAGTAGCCGCCGCGCAGGCTGCAGTGGCGGTGGTGAGACTGACTAGTCATGGTAGAGGGACCATGTTTGGTGGTGTACATGAGAAGTGGGCTGCTGTCAAGATTCAAACAGTTTTTAGAGGTTATCTGGTAAGTAAGTAGAGTTTTTATTTCTTAATTTAT…	GhiIQD09	MGRASRWLKSLFGIKNSKNSFNPRDGKDKKNGSIDHSVGDSSISPEKVAWLRWCYNETEREQNKHAIAVAAATAAAADAAVAAAQAAVAVVRLTSHGRGTMFGGVHEKWAAVKIQTVFRGYLARKALRALKGLVKIQALVRGYLVRKQASATFHSMQALMRAQATIKSQKARAIINNDAIRFDIRARKSMERFDDTRSEHTVSIHSRRLSASLDIDESPKIVEVDTGIKPKARSRRTNTSISDFIDDHTYQTLPSPLPCRCPARLSIPDSRHYQDIDWGFSGDECRFSTAHSTPRFINSCAPATPAKSVSGHNFFRPCGDSPNYMANTQSFKAKLRSHSAPKQRPEPGPKKRLSLNEMMESRSSLSGVKMQRSCSRAQKAIHFKNAVMGKLDRSLEFGK…	GhiIQD09	ATGGGGAGAGCTTCAAGGTGGCTGAAGAGCTTGTTTGGGATAAAGAACAGCAAAAACAGCTTCAATCCCAGAGACGGGAAAGACAAGAAAAACGGCAGCATTGACCATTCAGTGGGTGATTCAAGCATTTCCCCAGAAAAGGTTGCGTGGTTAAGATGGTGCTATAATGAAACAGAGAGGGAGCAGAACAAGCACGCCATTGCTGTGGCTGCCGCCACTGCTGCTGCGGCGGATGCAGCAGTAGCCGCCGCGCAGGCTGCAGTGGCGGTGGTGAGACTGACTAGTCATGGTAGAGGGACCATGTTTGGTGGTGTACATGAGAAGTGGGCTGCTGTCAAGATTCAAACAGTTTTTAGAGGTTATCTGGCTCGAAAAGCATTACGAGCTTTGAAAGGATTG…
GH_A05G0790	GH_A05G0790.1	GhiIQD10	ATGGGTGTCTCAGGAAAATGGATCAAAGCACTAGTGGGCTTGAAGAAATCAGAAAAGTCTCAATCTTCAGAGAAAGTAGAAAATGTTAGTTTGAATGTTGCGAATTTTTTTTGCCCTTCCGTAGGTTTAGATTTGGCTTCATGCTTGTGTCACAACCCACACACAATATCCTGGCCTGTGACATGTACATCATGGCACGTGTGCCTCTTCAAAATGCTGAAGTATTATCAAATGTCAGAAAGTATCTTCTGTGCGCACTTGTAGCTAGATGATCATGTTTTTGGAGTAATGCATTTTTCGTTGACTTATGGCTTAGCTGAGTTGTTGACTAATCCGGTACATACAAGGAGTATTATGTAGTAACTTACATGCAGTAGCTTTCCTTGTTAGCCTAATCAA…	GhiIQD10	MGVSGKWIKALVGLKKSEKSQSSEKVENRATGSKFRHRRKHSVEFDTNELQEELDENAASLAENATCATIDAAGCPSDALEVHDAPLNEHAREEWAATRIQTAFRGFLARRALRALKGLVRLQALVRGHAVRKQAAITLRCMQALVRVQARVRARRVRLALENQTAQQKLQQQLANEAHVKEIEEGWCDSIGSVEEIQAKLLKRQEAAAKRERAMAYALAHQWQAGSRQQSVPAGFEPDKSSWGWNWLERWMAVRPWENRFLDINLRDGVKIREDSPAEGKNDASSQIKPAIGKPAASSLHANLSNKKTGPSHFDGSDSPPGKSACVLEAVNAPSSKPKSKPNREDSVEEAGSGPVISSRSHSNPKERRTQSDKLAKRRLSMPNTGGVIVSQTTKLSKT…	GhiIQD10	ATGGGTGTCTCAGGAAAATGGATCAAAGCACTAGTGGGCTTGAAGAAATCAGAAAAGTCTCAATCTTCAGAGAAAGTAGAAAATAGAGCAACTGGTAGCAAATTTCGTCACCGAAGAAAGCATTCGGTTGAGTTTGATACAAATGAACTTCAAGAAGAGTTGGATGAGAATGCTGCTTCACTAGCTGAAAATGCTACTTGTGCAACTATAGATGCTGCTGGCTGTCCTTCTGATGCACTTGAAGTGCATGATGCACCTCTTAATGAACATGCAAGGGAAGAATGGGCTGCCACGAGGATACAAACTGCTTTCCGAGGATTTCTGGCCAGAAGAGCACTGCGAGCATTAAAAGGATTGGTAAGACTGCAGGCCCTTGTCAGGGGTCATGCTGTAAGAAAA…
GH_A05G1339	GH_A05G1339.1	GhiIQD11	ATGGGGAAAGCTGCAAGGTGGCTGAAGGGGTTATTGGGCATGAAAAAGGAGAAAGATAAAGACCGGATAGAGCAATATTCATCTGTTTTATCCGATAAAAAAGAGAGGAAAAGATTTAGTTTTGGCAAATCCAGCAAAGGTGTCAGTGAAATTTCTCAGAGTCCAAGCAATGTTTCCACGACTACAGATGCTGCTTGGCTCAGATCCTACATTGCTGAAACTGAGAAAGACCAAAACAAGCATGCAATTGCAGTGGCTGCTGCCACCGCAGCTGCAGCTGATGCCGCCGTGGCCGCAGCAAAGGCGGCAATGGCAGTGGTGAAGCTAACCAGTAATGGACGAACCAGTTTGGTTGGTGGAGGGAGGGAAAGGTGGGCAGCTATGAAAATTCAAAGCGTC…	GhiIQD11	MGKAARWLKGLLGMKKEKDKDRIEQYSSVLSDKKERKRFSFGKSSKGVSEISQSPSNVSTTTDAAWLRSYIAETEKDQNKHAIAVAAATAAAADAAVAAAKAAMAVVKLTSNGRTSLVGGGRERWAAMKIQSVFRGYLSRKALRALKGLVRLQALVRGYLVRKRTIATLHSMQALLRAQTTVRSQRIHRSFNKDHSCCLEHKPRSSIERFDEPRSVIHSKRLSASMETNAYDDSPKIVEIDTFKTRSRSRRFNLNALSECGDDFASHTNTSPLLCPVPVRTSTPHHQNVDDFEWCFADDECRLSTAQSTPRFANPVRTPIAPATPLSVCGEGYFRRPHSNLPNYMAKTQSFKAKLRSHSAPKQRPEPGAKKRLSLNGLMAARNSISGVRMNTSCYQVDE…	GhiIQD11	ATGGGGAAAGCTGCAAGGTGGCTGAAGGGGTTATTGGGCATGAAAAAGGAGAAAGATAAAGACCGGATAGAGCAATATTCATCTGTTTTATCCGATAAAAAAGAGAGGAAAAGATTTAGTTTTGGCAAATCCAGCAAAGGTGTCAGTGAAATTTCTCAGAGTCCAAGCAATGTTTCCACGACTACAGATGCTGCTTGGCTCAGATCCTACATTGCTGAAACTGAGAAAGACCAAAACAAGCATGCAATTGCAGTGGCTGCTGCCACCGCAGCTGCAGCTGATGCCGCCGTGGCCGCAGCAAAGGCGGCAATGGCAGTGGTGAAGCTAACCAGTAATGGACGAACCAGTTTGGTTGGTGGAGGGAGGGAAAGGTGGGCAGCTATGAAAATTCAAAGCGTC…
GH_A05G1378	GH_A05G1378.1	GhiIQD12	ATGGGTGCCTCAGGAAAATGGTTTAGATCACTTGTTACTTTGAAACCACTTCATGAACCCATTAACCATGTATTTTTCTTCAATCCCATAACTAAGTTTCTAATTTTCTGGAACTCCTTTTTTTTCTTCGTGCTTTCAGTGTTTTTATTTTTTATAATTTTTTTTTGTAGGAGAAAATGGGAGATAATAAGTCCAAGAAGAAATGGAAACTATGGAGGAGCTCATCAGAAGGGTTCGGATCCTCCTCATCCAAGAGTTACAAAATGCGGCACGTGGTAGCTGGTCCACAGGCCTCCGATTCTTCTTTCATAGCTGATGATCTGCTTGCCGCTGCCATGGCTACCATTGTTCGTGCTCAACCCAAAGATTTCAGAGCTGTGAAGCGTGAATGGGCCGCCA…	GhiIQD12	MGASGKWFRSLVTLKPLHEPINHEKMGDNKSKKKWKLWRSSSEGFGSSSSKSYKMRHVVAGPQASDSSFIADDLLAAAMATIVRAQPKDFRAVKREWAAIRIQTAFRGFLARRALRALKAVVRIQAIFRGRLVRKQAAVTLRCMQALVRVQARVRAQCLVSSEEQSLHKLDDPTKEAEKGWCDIPGTLEEVKAKQQMRQQGAKKRERAMAYSVSRSYGNGSPNFRANKQQPLSRRHHQRLHRDNPDWDWLDRWMSTKPWETRTIEEPDSTVSRKSEDNIVSFHSNSSDQRDSLKRKTKNPKTSILTRPANQTSGSTSAPSSESVYDKSSTSTSTASVSPTTLSSNTIVVGTLNDSNHTQKPSYMNPTESIKAKQKTLKFSSSDNMRRHVVDDDDDDDLQ…	GhiIQD12	ATGGGTGCCTCAGGAAAATGGTTTAGATCACTTGTTACTTTGAAACCACTTCATGAACCCATTAACCATGAGAAAATGGGAGATAATAAGTCCAAGAAGAAATGGAAACTATGGAGGAGCTCATCAGAAGGGTTCGGATCCTCCTCATCCAAGAGTTACAAAATGCGGCACGTGGTAGCTGGTCCACAGGCCTCCGATTCTTCTTTCATAGCTGATGATCTGCTTGCCGCTGCCATGGCTACCATTGTTCGTGCTCAACCCAAAGATTTCAGAGCTGTGAAGCGTGAATGGGCCGCCATTCGAATTCAGACTGCATTTCGCGGCTTCCTGGCAAGACGAGCTTTGAGGGCATTGAAAGCAGTAGTAAGGATTCAAGCCATATTCCGTGGTCGTCTAGTC…
GH_A05G1577	GH_A05G1577.1	GhiIQD13	ATGGGTTCTGGAAACTTGTTCAAGTCAATAATAAATATAGTGAAAGATGACAACTCAAAGAAAGTAAAGGTACATTCTCAAACAGTCATAAACTAAGCTATGCAAGTCTCTACATTCCAGTTATAAATAAACCTAAGATTGCTTCTCTAGTCATTGATTTGCAATTTGAATCCTTGGGTTAATATTATCTATGATCTCGTCTGTTTGGCACAGGGATCTTCTGCTTCTAAAAAATCCAGTGGCTTCAAATGGAAGAAACACCAGCAAAAGGCATCCACTAGACCGGGTCTAATTAGCGGAAATTCCAATACTCTTGGCATGCCAATTGAGGACTTGGCAGCTACTAGGATTCAAACTGCATTCAGGGCTTATAGAGTATGTTGGTTTGGAGGTTCTACA…	GhiIQD13	MGSGNLFKSIINIVKDDNSKKVKGSSASKKSSGFKWKKHQQKASTRPGLISGNSNTLGMPIEDLAATRIQTAFRAYRARKQLRRLKGIVRLQAQTLNSSIKKQATTTLNYLHSWSNIQAQIRARRLCMVTEGHLRQKKIANQIKLEAKLHDIEVEWSCGPETMEEILTKIHNREEAAVKRERTMAYAFSHQWRAPNSNNNGIGNYELAKANWGWSWVERWIAVRPWESRLPAQSITPKKLQNKQINKAGKNSSSPKPKPKPHFSNEKETMKMKPRRLTYPGAEKPAARQQSTKAEEENNKKEERVV	GhiIQD13	ATGGGTTCTGGAAACTTGTTCAAGTCAATAATAAATATAGTGAAAGATGACAACTCAAAGAAAGTAAAGGGATCTTCTGCTTCTAAAAAATCCAGTGGCTTCAAATGGAAGAAACACCAGCAAAAGGCATCCACTAGACCGGGTCTAATTAGCGGAAATTCCAATACTCTTGGCATGCCAATTGAGGACTTGGCAGCTACTAGGATTCAAACTGCATTCAGGGCTTATAGAGCTCGAAAACAATTACGTCGATTGAAAGGTATTGTAAGATTGCAGGCTCAAACCCTAAATAGTTCCATCAAAAAGCAAGCTACAACAACATTAAATTATCTTCACTCGTGGAGCAACATACAGGCTCAAATAAGAGCCCGTCGACTCTGTATGGTAACAGAAGGCCAT…
GH_A05G1877	GH_A05G1877.1	GhiIQD14	ATGGGAAAATCCACTTCCTGTTTCAAAATCATCACTTGCGGCGGAGATTTTGCTGAGAACAACGACGTTATTCATGTTCCTGAGCCTGAGGTATATAAATAAATATCCTTTTCGCCTTTACGGCTGCCATTTTTTTTTTGTGTTTTGCGTTGGATTAGGATTTCACCTTCCGACTTTGCATTTGAGGTTTCAGTTCGAAACAGTCAATGCATTGTTTAATTTATGGATTTTCTTGAGGAATCGGAGTTTAAACTTGCCTTACTCCACTACTTTAAGATCTGACTACTCTTGGCTTCGCATATTTATCAGCAATGTCCAGGCTGCCTTTTAAATCCGATTACTTTCACAACTTATATAATGCAAATGTTTTTTAGTTTCTGGTTTCAAATATAGCAAGTT…	GhiIQD14	MGKSTSCFKIITCGGDFAENNDVIHVPEPEIKKSNDKKGWSFRKRSERHRVLSNTVIQEATSGLKESPESAGFNFQQPDASIIPEETSTIEYSEEKPQALTPKEHIEEESKCVASKGYPEKKSQLLIPEGSKVPEPVASTTNEAEDDANLDESVVVIIQTAIRGFLAHKELGKLKNLVKLQAAVRGHLVRRHALGTLRCIQAIVKMQVLVRARLSQEGSYDEKKRDGKHCGENQSLERSAIKQNATYTSIENLLSNRFARKLMDSTQKTKPIHIKCDPSKPNSAWSWLERWMSVSLSKRPSTTELSIEQPEREKSDNCDFQVTTTVPESFPESNEPKLYVRETLVSSESEENLIAHDAANSKFEACQTTSSTVMDDLEQPQIDNSTSDIKEGEENLIIY…	GhiIQD14	ATGGGAAAATCCACTTCCTGTTTCAAAATCATCACTTGCGGCGGAGATTTTGCTGAGAACAACGACGTTATTCATGTTCCTGAGCCTGAGATTAAGAAATCAAATGACAAAAAGGGATGGAGTTTTAGAAAGAGATCTGAACGGCATCGGGTGCTTAGCAACACTGTTATACAAGAAGCTACTTCTGGACTTAAGGAAAGCCCGGAATCTGCCGGTTTTAATTTTCAACAGCCTGATGCATCCATTATTCCTGAAGAAACCTCCACCATTGAATACAGTGAAGAGAAACCTCAGGCGCTGACACCAAAGGAGCACATTGAAGAAGAATCTAAGTGTGTGGCATCAAAAGGATACCCTGAAAAAAAATCTCAGTTGTTGATTCCAGAGGGCTCAAAAGTT…
GH_A05G3022	GH_A05G3022.1	GhiIQD15	ATGGCTGCTGCCGCCGCGGTCGCAGCTTCTAAAGCGACTGCTGAGGCTGTTCACGTCGCTTCTTTACAACGCATATTGTCGGAGAGAACGGCTGCTACCAAGATTCAAACTGCATTTCGCGGATACTTGGTATGAGATCACTCCTTTTTATTTATTTACTTTTTATGTTAAGCTCTTAATTATTTCTTGCATACCTGATATCAATTGAAAATTCATGAAACTATCTAAAAAGTTCTAATGTTAAAAATTCCAAGTTTTTTTTTATCAATTAAACAAATAAAAATATTAATTTATGTTATTCTTAATTTCTTTTAAATATTCGTGTTTGATTCATATTTATGATGATCTAATTTTCTAAAGATATTTATCTAAAAATATTAGATGGAAGTTAAACATTAA…	GhiIQD15	MAAAAAVAASKATAEAVHVASLQRILSERTAATKIQTAFRGYLARRALPELRRSERLKSMIEGQSVKEQAKIALRCMQTKGGLQSRIRGMRLRILEENQILHHHLQQKRHKEHDKFNASMGGEWHDGRKSKEQSEAIKQYKQEAAMRRERALAYAFTRQRSWKVTSKAANQTLMDQNTPHWGWSWLERWMAARPWDIPCSSPNNASINTLASSSISNNDNKPSPTPSKPTPPPPSKIPSFSSLSSQIRQPSPRGTRPGGDECSTPDRDRRRQSSIGGFSSAKDDKSVGSSAEKAPSWMKQVRTSQLSSSLRHDRIPEKGVAGIAKKRLSFPATAGKVRI	GhiIQD15	ATGGCTGCTGCCGCCGCGGTCGCAGCTTCTAAAGCGACTGCTGAGGCTGTTCACGTCGCTTCTTTACAACGCATATTGTCGGAGAGAACGGCTGCTACCAAGATTCAAACTGCATTTCGCGGATACTTGGCTCGGAGGGCATTGCCAGAATTGAGAAGGTCGGAGAGATTGAAATCAATGATAGAAGGGCAATCCGTGAAAGAGCAAGCAAAAATTGCATTAAGATGCATGCAAACAAAGGGTGGACTGCAGTCCCGGATTCGTGGAATGAGGCTTAGAATATTGGAAGAGAACCAAATTCTTCATCACCACCTTCAACAGAAACGCCACAAAGAGCATGACAAGTTTAATGCCTCTATGGGAGGAGAGTGGCATGATGGTAGAAAGTCGAAGGAGCAA…
GH_A05G3607	GH_A05G3607.1	GhiIQD16	ATGGGAAAAAAAGGTGGCTGGCTTTCTATTGTGAAGAAAGCTTTGAGCCCTGAATCCAAGAAATCTCAGGTTTCAATGATTTAATTCATAATTTAATGGATTTCTTTTTTCGGTTTGGGTTTTCTTAGATTTGTTGTTTTTAATTAATTTCAGCACCAAACTCCAAAGCCAAAGAAAAAATGGTTCGGAAAAAGCAAAGATTTGAGCCCTGTGTCTGTGCCTGAAGAAACTGAAGTGATAACTGAAGATGCAAAGCTAAAAGAAGCTGAAAACGAACAAAGCAAACATGCCTACTCTGTGGCTCTTGCCACCGCTGTGGCGGCCGAGGCAGCGGTGGCAGCTGCTCAGGCGGCTGCTGAAGTTGTCCGTCTCACTTCTCAGCCGCGCCATCTGGGGAAG…	GhiIQD16	MGKKGGWLSIVKKALSPESKKSQHQTPKPKKKWFGKSKDLSPVSVPEETEVITEDAKLKEAENEQSKHAYSVALATAVAAEAAVAAAQAAAEVVRLTSQPRHLGKSKEEIAAIRIQTAFRGYLARRALRALRGLVRLKSLIRGQSVKRQATTTLRCMQTLARLQSEISARRIRMSEENQALQRQLQQKCQKELEKLRAPMREDWNDSTQSKEQIEARQQNKQGATMKRERALAYAYCHQRSWKNCSRSVNQTFMDPSNSHWGWSWLERWMAARPWEVQSTTDNNDRGSVKSMGACSISISEISRAYSRRDLNNDNKPSPTPQKSSRVPSRQSPSTPPSKAPSISSVSGKTRLPSPRGSQWGGYEDSRSILSTRSDRYRRHSIAGSSMRDDESLTSSPAV…	GhiIQD16	ATGGGAAAAAAAGGTGGCTGGCTTTCTATTGTGAAGAAAGCTTTGAGCCCTGAATCCAAGAAATCTCAGCACCAAACTCCAAAGCCAAAGAAAAAATGGTTCGGAAAAAGCAAAGATTTGAGCCCTGTGTCTGTGCCTGAAGAAACTGAAGTGATAACTGAAGATGCAAAGCTAAAAGAAGCTGAAAACGAACAAAGCAAACATGCCTACTCTGTGGCTCTTGCCACCGCTGTGGCGGCCGAGGCAGCGGTGGCAGCTGCTCAGGCGGCTGCTGAAGTTGTCCGTCTCACTTCTCAGCCGCGCCATCTGGGGAAGTCAAAGGAGGAAATAGCTGCTATCAGGATTCAAACAGCATTTCGTGGATATTTGGCTAGGAGGGCACTGCGAGCTTTGAGAGGG…
GH_A05G4277	GH_A05G4277.1	GhiIQD17	ATGGGTGCCTCAGGAAAATGGTTTAAATCGCTCATAACTTTCAAACCACTTCAAGATCCTACTAATCAAGTAACTTCACACTAGGTTTACCTCTTTTTTCTTTCTTCTTTTTATTTATGCTTTCATGGTTTCATTTTTCTGTTAATTGGGTTTGTAGGAGAAGGTGGGAGATAAGACGAAGAAGAAGTGGAGGCTATGGAGGAGCTCATCCGAAGGGTTGGGATCCACCTCATCAAAGGTTCCCAGGATGCGCCACGTGGCTGCTTCAGAGGCCTCTGATTCATCTTTGTTGGTGGATGATGTGCTGGCTTCAGCTATGGCTACTGTTGCTCGTGCTCCACCCAAAGATTTCAGAGCTGTCAAGCGGGAATGGGCCGCTATTCGAATCCAGACCGCATT…	GhiIQD17	MGASGKWFKSLITFKPLQDPTNQEKVGDKTKKKWRLWRSSSEGLGSTSSKVPRMRHVAASEASDSSLLVDDVLASAMATVARAPPKDFRAVKREWAAIRIQTAFRALLARRALRALKAVVRIQAIFRGRQVRKQAAVTLRCMQALVRVQARVRAQCVTSSEGQAMPKLMDEDPAKQAERGWCDSLGTLEELKAKQQMRQQGAIKRERAIAYSVLKQQSRSCASPNARANKQPYSHNHQRLDRNSPDWNWLDRWMATKPWETRAMEEGTEPAEKVMMMNTISRKSEDNNFSFHSSSYEHEPLKVKRNNVTTRILARPPTSMQTSGSLSAPSSESVYDETSTSTSSASPTTLSSNTPVAGTLEDNHAQKPSYMNPTESIKAKQKNTFRFSPDNVRRRHVVD…	GhiIQD17	ATGGGTGCCTCAGGAAAATGGTTTAAATCGCTCATAACTTTCAAACCACTTCAAGATCCTACTAATCAAGAGAAGGTGGGAGATAAGACGAAGAAGAAGTGGAGGCTATGGAGGAGCTCATCCGAAGGGTTGGGATCCACCTCATCAAAGGTTCCCAGGATGCGCCACGTGGCTGCTTCAGAGGCCTCTGATTCATCTTTGTTGGTGGATGATGTGCTGGCTTCAGCTATGGCTACTGTTGCTCGTGCTCCACCCAAAGATTTCAGAGCTGTCAAGCGGGAATGGGCCGCTATTCGAATCCAGACCGCATTTCGAGCCTTGCTGGCAAGACGAGCTTTAAGGGCCTTGAAAGCAGTAGTGAGGATTCAAGCTATATTCCGGGGTCGTCAAGTCCGAAAG…
GH_A06G0050	GH_A06G0050.1	GhiIQD18	ATGGGAAGATCCATTTCCTGTTTCAAAATCATCACTTGCGGCACTGATTCAGCTGATAAAAACGAAGACTTTATCGATGTTCCTCAGGTATATGTTTTATCCTTAGCCTTTACGGCGGCTGTTCGTTGGATTTAAGATTTCATGGTTTTTTTTTTTTTTGTAATTGATGTTTTTAGTTTCTTCAAATGAAGTTTTTAGAGGAATCGAAGCTTTAGAACTTGACATCTTACACTATTTTGAGATCCAATTGCTTCCACAGTTTATGAATTGAAAATGTTTATTTTTCAGCTGCAGTTTCCAAATCTAGCAAGTTTTTTAAGGTCAAATTGTATAGAATGTCTCTGTACTATGTGATTTTATGGATTTAGTCCCTATACTATAATTTGATCATTTCTTGGC…	GhiIQD18	MGRSISCFKIITCGTDSADKNEDFIDVPQDKRSSDKKGWSFRKRSERHRVLSNTVVQEASTGLEESPEAASYVQQSDVSVAPEKTSTVQYTEEKLQPVAPKDYVEEKSQLSTQEDSKVSEPVVAATNEAKDDANMDESDVVVVQTAIRGFLARKELGKLKNLVKLQAALRGHLVRRHAVGTLRCIQAIVKMQMLVRAHHARLSQECSYSEKNAASTSIEKLLSNRFARQLLDSTPKTKPIHINCDPSKPSSGWSWLERWMSTSSSEKTSTAELPNEQLDATVPSEAISESNDVNKTMVSSESEENLITYVAADSKSEACLPTSSVTGDLERTRIDNMSTSDLKETSLDQTIETEAHCLDVGVESLDAVSSGADTISRSKEPNIAENPVLRDRKGQHYGS…	GhiIQD18	ATGGGAAGATCCATTTCCTGTTTCAAAATCATCACTTGCGGCACTGATTCAGCTGATAAAAACGAAGACTTTATCGATGTTCCTCAGGACAAGAGATCGAGTGACAAAAAAGGATGGAGTTTCCGTAAGAGATCTGAACGGCATCGGGTGCTTAGCAACACTGTGGTACAAGAAGCTTCTACTGGACTGGAGGAAAGTCCTGAAGCTGCTAGTTATGTTCAACAGTCCGATGTCTCCGTTGCTCCTGAGAAAACCTCCACTGTTCAGTACACCGAAGAGAAACTTCAGCCAGTAGCACCAAAAGATTACGTTGAAGAAAAATCTCAATTATCGACCCAAGAGGACTCGAAAGTGTCCGAACCTGTTGTTGCTGCCACAAATGAGGCTAAAGATGATGCT…
GH_A06G1837	GH_A06G1837.1	GhiIQD19	ATGGCTAAGAAAAAGAGCTGGTTCAGTCTAGTGAAGAAGTTTTTTCTCTTTGAGACAATTGCAAGAACAGAGAAGGTAACGTTTTTTTTTTGCTATTTACTGCTGTTTCCCAGGTTTTTTTTTTCTTTTTCTTTATCCTTTATGAATGGATGTTATCTATTTGTCAGAAGGAGAAAAAAAGGAAATGGATGTTTGGAAGGTTAAGGACCAAGAGGTTGACAGCACCACCAAAGGACGTGACAAAGGATGAGCATGTAACTGTGGCTATTACCACACCTGCTGCCCCCGAAGCAGGTGTTGCAGCCGCTCAGGTTGCGGCCGAGATTGTTCCACCCTATGGTACCCTTCATTCTAACCATATATGTGATGGAAAAACAGATGAACGAGCCCTGGATGTTC…	GhiIQD19	MAKKKSWFSLVKKFFLFETIARTEKKEKKRKWMFGRLRTKRLTAPPKDVTKDEHVTVAITTPAAPEAGVAAAQVAAEIVPPYGTLHSNHICDGKTDERALDVQELAATKIQATFRGYLARKALRALKGIVRLQAIIRGSAVRRQAMNTLKCLQSIVNIQSQVSAMRFQMAEGTWQYDETKQLVTLEDMIIKVDINSQRRWDDSILTKEEAEAMVLSRKEAAIKRERIKEYSYVHRKSAESELNKGNGRLKYWLDEWVDTQVTKSKELEDLDSVWTSNRKPMEESRAKHLRLKTSPRPYHYNSEGLESPVVPVPRRSFHKKQCSLGEDNSFPTSPVVPPYMAATQSARAKVRSLSSPKVRPGSFETQSESYSPYKNKLCLISSITSEVPSSYKMSGSRSS…	GhiIQD19	ATGGCTAAGAAAAAGAGCTGGTTCAGTCTAGTGAAGAAGTTTTTTCTCTTTGAGACAATTGCAAGAACAGAGAAGAAGGAGAAAAAAAGGAAATGGATGTTTGGAAGGTTAAGGACCAAGAGGTTGACAGCACCACCAAAGGACGTGACAAAGGATGAGCATGTAACTGTGGCTATTACCACACCTGCTGCCCCCGAAGCAGGTGTTGCAGCCGCTCAGGTTGCGGCCGAGATTGTTCCACCCTATGGTACCCTTCATTCTAACCATATATGTGATGGAAAAACAGATGAACGAGCCCTGGATGTTCAAGAACTTGCTGCCACAAAAATCCAAGCTACCTTTCGGGGCTACCTGGCAAGGAAAGCTTTGCGGGCGCTGAAGGGGATAGTGAGGCTTCAA…
GH_A06G1940	GH_A06G1940.1	GhiIQD20	ATGGGCAAAAAAGGAAGCTGGTTTACTGCTGTGAAGAAAGTTTTAAGCCTTGAACCCAACAAAGATGAGGTTTCATTTTCAATTATTTTATTTCATAATCTAATTGTTTTTTATTTATTTTTTTGTAATTTTTTTTATTTCACCAGAAGATTCAAAAATCCAAGAAAAATGGGGTTAAATTACCTGAAAAGATCAAAGGAAGCAAACGTGCCAACTGGTTCGCTCCGGCCACCACCATGGTGACCGGCGCGTTGGTTCGCCTTACTTTGTCGCCACACTACTTGGGAAAATCAATGGAGGAAATAGCTACTGTTAAGATTCAAACTGTTTTTCGAGGATACTTGGTATCAAATTTCTTCCACTTATTATTATTATTTTTTTATAATTTTAAACTTCTTA…	GhiIQD20	MGKKGSWFTAVKKVLSLEPNKDEKIQKSKKNGVKLPEKIKGSKRANWFAPATTMVTGALVRLTLSPHYLGKSMEEIATVKIQTVFRGYLARKALRDLRGLERLKSLIQGQSVKRQATITLRCMRTLARVQSQTRTRQLRMSEQNRALQKHLQTKYEKQLQNSKSYMGEDWNVSTKSKEQMQAKQQYRQVAAMRRERALAYSFTHQVTCRSMNHTFMDPFNPKWSWSWLERWMSTRPWEIQNAPDNNDHGPSKSVGAEITKAKSQSDVNNDHNKRSSTLAKPIRPPNRRSFSTPPSKTHSISSKKGLQSPSPTRIQLPDRYKRHSIGGLSLERDDEVFANSPPSNKIPARSSSKDQSRPPSINRNPVNTRRHSGPPKVDIFPN	GhiIQD20	ATGGGCAAAAAAGGAAGCTGGTTTACTGCTGTGAAGAAAGTTTTAAGCCTTGAACCCAACAAAGATGAGAAGATTCAAAAATCCAAGAAAAATGGGGTTAAATTACCTGAAAAGATCAAAGGAAGCAAACGTGCCAACTGGTTCGCTCCGGCCACCACCATGGTGACCGGCGCGTTGGTTCGCCTTACTTTGTCGCCACACTACTTGGGAAAATCAATGGAGGAAATAGCTACTGTTAAGATTCAAACTGTTTTTCGAGGATACTTGGCGAGGAAGGCATTGCGAGATTTGAGAGGGTTAGAGAGGTTGAAATCGTTGATACAAGGGCAATCCGTGAAACGACAAGCCACTATTACGTTACGATGCATGCGGACACTTGCTCGAGTGCAGTCCCAAACT…
GH_A07G0094	GH_A07G0094.1	GhiIQD21	ATGGGAAAAGCTACAAGGTGGCTAAAGAGCTTATTTGGGATAAAGAACAACAAAGAATGCCCAAGTTCCGGTGACCGGAAAGATAAGAAACGGTGTAGCATTGGCCATTCAGGGCGGGAATCAAGTGGCGGATTATGTCACAACCCTACAACGATACCACCAAATATATCACCGGCAGAGGTGGTGTGGCTGAGATCATTCTACAATGAAACGGAGAAAGAGCAGAATAAGCACGCAATTGCGGTGGCAGCTGCCACGGCTGCTGCTGCAGATGCCGCTGTCGCCGCCGCTCAGGCAGCTGTGGCGGTGGTGAGGCTTACGAGTCATGGAAGAGGTACCATGGTCGGCGGTGGTGGACACGAAAAGTGGGCTGCCATTAAGATTCAATCCGTTTTCAGA…	GhiIQD21	MGKATRWLKSLFGIKNNKECPSSGDRKDKKRCSIGHSGRESSGGLCHNPTTIPPNISPAEVVWLRSFYNETEKEQNKHAIAVAAATAAAADAAVAAAQAAVAVVRLTSHGRGTMVGGGGHEKWAAIKIQSVFRGYLAKKALRALKGLVKIQALVRGYLVRKQASATLHGMQALIRAQATIRSQKARKSMEQFDDTRSERTVSFHSRRLSASLDTLNIEESPKIVEIDTGRPKSRSRRTNTSVSDFGDDPSFQILSSSVPARVPARLSVPDSHTDWGLTGDECRFSTAQSTPRFINCCVSNAPVTPAKSVCADNFFRHYGIGNLNFPNYMANTQSFKAKLRSHSAPKQRPEPGPKKRLSLVETTESRSSLSGARMQRSCSQAQEAISFKNVVMGKLDRSL…	GhiIQD21	ATGGGAAAAGCTACAAGGTGGCTAAAGAGCTTATTTGGGATAAAGAACAACAAAGAATGCCCAAGTTCCGGTGACCGGAAAGATAAGAAACGGTGTAGCATTGGCCATTCAGGGCGGGAATCAAGTGGCGGATTATGTCACAACCCTACAACGATACCACCAAATATATCACCGGCAGAGGTGGTGTGGCTGAGATCATTCTACAATGAAACGGAGAAAGAGCAGAATAAGCACGCAATTGCGGTGGCAGCTGCCACGGCTGCTGCTGCAGATGCCGCTGTCGCCGCCGCTCAGGCAGCTGTGGCGGTGGTGAGGCTTACGAGTCATGGAAGAGGTACCATGGTCGGCGGTGGTGGACACGAAAAGTGGGCTGCCATTAAGATTCAATCCGTTTTCAGA…
GH_A07G0227	GH_A07G0227.1	GhiIQD22	ATGGGTGCTTCAGCGAAATGGGTGAAATCTCTTATTGGTCTCAAGAAAACTGTAAAAGATGACCAAGTAAGCTCTACTTTTTTTTGTGGTTCATCTCAAAGTTACCTTACTGTTATATAGAATTAATCACCAAAGTGTTTTTTTTTTGTAGGAAAAGATGGGTGGCAAGAGCAAGAAATGGAAGCTATGGAGGAGTTCTTCAGGGGATGGAATAGGTTCCTCATGGAAGGGTTTTAAAGGAAAGTTTAAAGCAGATTACGAAGGATCTGATTCTTCACCAAGGTCTGAAGCTTTCTCTGCTGCCATGGCTGCTGTGGTTCGAGCTCCTCCTAAAGATTTCAGGGTTGTAAGGCAAGAATGGGCTGCTATCCGCATTCAAACTGCTTTCCGAGGCTTCTT…	GhiIQD22	MGASAKWVKSLIGLKKTVKDDQEKMGGKSKKWKLWRSSSGDGIGSSWKGFKGKFKADYEGSDSSPRSEAFSAAMAAVVRAPPKDFRVVRQEWAAIRIQTAFRGFLARRALRALKGVVRIQAFVRGRQVRKQAAVTLRCMQALVRVQARVRARRVRMSIEGQAVQKILDEHRSKAELLKQAEEGWCDSKGTLDDVTIKLQLRQEGAFKRERALAYSLAQKQWRLNMDSNTRTNSSVSVPYLKNQVFDKNSWGWSWLERWMAARPWETRLMEQSQADPSEPTPPSKTCSESRKITRPTEPCSVKVRKNNVTTRISAKPPHIGQGTRSSSSPSSEFRFEESSASSSICTSTTRVSWNTMPTSERTEKTGNSRPNYMNLTESTKAKQRAANHALRRIQMQSMD…	GhiIQD22	ATGGGTGCTTCAGCGAAATGGGTGAAATCTCTTATTGGTCTCAAGAAAACTGTAAAAGATGACCAAGAAAAGATGGGTGGCAAGAGCAAGAAATGGAAGCTATGGAGGAGTTCTTCAGGGGATGGAATAGGTTCCTCATGGAAGGGTTTTAAAGGAAAGTTTAAAGCAGATTACGAAGGATCTGATTCTTCACCAAGGTCTGAAGCTTTCTCTGCTGCCATGGCTGCTGTGGTTCGAGCTCCTCCTAAAGATTTCAGGGTTGTAAGGCAAGAATGGGCTGCTATCCGCATTCAAACTGCTTTCCGAGGCTTCTTGGCAAGAAGGGCTTTAAGGGCTTTAAAGGGAGTCGTTAGGATCCAAGCCTTTGTTCGCGGTCGACAGGTGAGGAAACAGGCTGCT…
GH_A07G0720	GH_A07G0720.1	GhiIQD23	ATGGGAAAATCTCCCGGAAAATGGATTAAGACTGTGCTTTTTGGAAAGAAACCTTCCAAATCTAGTTATCCTAAAGGAAGGGAGGTAATATTTTACTGCTAATTACTACTAAACAGCAAATATCATGTTATTTATATTTGAAAGCAGTGGTAAATTCTTGTTTGCAATGCTGTTAATTAGAGTTTCCTATAAGCTAGATGGGGGACAGATCCATAGTCGGGGCTGTTGCCACCATTGAAATCCTAAAGGCCCTAGGAGAGTTGGAGTATATTTAATAAATAGCTAGATTTTACGTATACCCCACTGAAATTGAAAAGAAAAATGATATGCATATTACATGTTTATAAATGTTTATTGATTTGCTTTGCAAAATAATAAGGTCTTATTAGAAATCCTATC…	GhiIQD23	MGKSPGKWIKTVLFGKKPSKSSYPKGREKVDNDSQVLVAARASESDLAVAPPFSSQLNPHTTERDERRLELENKETANISHDDETSLPMSQDIDSLKFTLQDSPSNPERIKHEQSATLVQAAFRGYLARRAFWALKGIIRLQALIRGHLVRRQAISTLCCMMGIVKLQARVRGQMVRHSDCVHELQKKCNQINLLESKLVVSLGFNMPSHIGKLSGHAFVRKLIASSPTVMPLRLRYDVGEPNSVWIWLERWSASCFWKPVPQPKKISNTKFQKKKVNGQTVEMDTGRAKRSVRRIPSSNMDSTSVQATSEFDKPKCNPRKIFGHPAGPVQENPQNELEKVKRNLRKVHNPVVEHSLQSEFEFEKLKSLEKVSSTPDLDIVEESLKRSAEKTSKEAAMT…	GhiIQD23	ATGGGAAAATCTCCCGGAAAATGGATTAAGACTGTGCTTTTTGGAAAGAAACCTTCCAAATCTAGTTATCCTAAAGGAAGGGAGAAGGTTGACAATGACAGCCAGGTATTGGTTGCAGCCAGGGCATCAGAAAGTGATTTGGCTGTGGCTCCTCCCTTCTCTTCACAGCTCAATCCTCATACTACTGAGAGAGATGAAAGGAGATTAGAATTGGAGAACAAGGAAACTGCAAATATCTCACATGATGATGAGACATCACTGCCAATGAGTCAAGACATAGATTCTCTGAAGTTCACTCTTCAGGATTCACCTTCTAATCCTGAAAGGATAAAGCACGAACAATCGGCGACCCTGGTGCAGGCTGCTTTTAGGGGTTACCTGGCTCGCCGAGCGTTCTGG…
GH_A08G1119	GH_A08G1119.1	GhiIQD24	ATGGGAAAGAAAGGGAGTGGATGGTTCTCTACGGTGAAGAAAGTGTTCAAGTCTTCATCTAAGGACTTGCCCGAGAAAAAGGTAACTGATTTTTGTTGTTGTTTGGTTTTGGATTTCTTTGCTTAATTTCTAGGCAACCGATCAAAGGTGTTTATGTTGGCATCTTTCAAGATTTTCTTTTTTTCAGATTTTCATTTTAAGGCAGACTTAAAAATAAAAAATATAAAAACAAAACAAAACCAAAATCCAAAACATTCTGGATTATGTTTCTTTCAGTTAGGGGTGCTTACCCTTTTCCTATCTGCACATGGTTAGCTCTTAGCTGGGTATCTTACATGCCCATTATTCATAAGTCATCTGTTACAAAACTAGATTTATCTAACTTTTCCTACATATTTA…	GhiIQD24	MGKKGSGWFSTVKKVFKSSSKDLPEKKEESVEKWPNEAPEVVSFEHFPAESSPDITKDESETSTPNKDRDHAIAVALATAAAAEAAVAAAQAAAKVVRLAGYRRHSMEERAATLIQSYYRGYLARSALRALKGLVRLQALVRGYNVRKQAQNTMRCMQALVRVQARVRARRLQLTQEKLQKRVDDDEDDNEEEKRGMEELKLERKPKSPLNKYDSWDGENVNGCASKKHDAVMRRERALAYAYSYQEEQRQHHEQLLMQPQHNGKDVGVYLNEREKAQWGWNWLECWMSSQPYPARQLGLQEGAYMALPRATTTTDNMSEKTVEMDDVTPIKSGSYLTQQQLQSDSSSVPSYMVTTQSAKAKVRSQGSAKQQRGPYVPEWNSSTKKASGCDSSSSGGGP…	GhiIQD24	ATGGGAAAGAAAGGGAGTGGATGGTTCTCTACGGTGAAGAAAGTGTTCAAGTCTTCATCTAAGGACTTGCCCGAGAAAAAGGAAGAGAGTGTTGAGAAATGGCCGAATGAGGCCCCGGAAGTAGTGTCATTTGAACATTTTCCGGCAGAGAGTTCACCAGACATCACTAAGGATGAGAGTGAAACGTCAACTCCGAACAAAGATAGGGACCACGCCATTGCTGTGGCCTTGGCAACCGCTGCTGCAGCAGAAGCTGCTGTTGCTGCTGCTCAAGCAGCGGCTAAAGTTGTTCGATTGGCTGGTTATAGACGCCACTCTATGGAAGAAAGAGCTGCAACTCTTATACAGTCGTATTATAGAGGCTACCTGGCTCGGAGTGCTTTGCGAGCTTTGAAGGGA…
GH_A08G1336	GH_A08G1336.1	GhiIQD25	ATGGGGAAGATTGGAGGAAACTCTTGGTTGACTGCAGTCAAGAAAGCCTTTAGGTCTCCTACTAAGGAAAACGATAAGAGGAGCTGTAGAAGGAGAGAAGATGGTGAACAAGAGGAAGAAGAGAAGGTTATTATTCTCTCTTCAACTTTTCCTTTTTCTCTTGAATGTTTTTGTTTGTGCATGTGATTAACTTTAATTCAATGTTCTTTTTCTTGGTTTGCGCAGAAAAGAGGGAAACGAAGATGGATTTTCAAGAAGCCTTCGTATCAGGAAACAGTGATACAACACAGTGAAGCAAGCACCATAGTCACAATAACCAATGCTAAAGTTGCCACTAATTCAGAAACCTCAGCACTGAATACCGTTCCCGAAGCTGAGCAAAGATCACATGCCATTGCA…	GhiIQD25	MGKIGGNSWLTAVKKAFRSPTKENDKRSCRRREDGEQEEEEKKRGKRRWIFKKPSYQETVIQHSEASTIVTITNAKVATNSETSALNTVPEAEQRSHAIAVAIATTAAAQAAVATAQAAVEVVRLTRPSVFLREHFAAIVIQTAFRGYLAKRALRALKGLVKLQALVRGHNVRKRANITLRCMEAMARVQARVRDQRKRLSVHERSMDSIFSDHRTNTLWSSYLADKNSIYSREESKYDDDWRTHWDEHPKTLKEIQAILQKTKQATMKREKALAQAFSNQIWTGDRNTVESEDEVDGKTRWVDRWTTRKQWESTGRMSSDHIDPIKTVEIDTSRPYSYSAPHSQNPNSQYHYQQRRPSSFSVASPLHKTIDGLPIRSITPSPSKAKPLQIYSASPRYL…	GhiIQD25	ATGGGGAAGATTGGAGGAAACTCTTGGTTGACTGCAGTCAAGAAAGCCTTTAGGTCTCCTACTAAGGAAAACGATAAGAGGAGCTGTAGAAGGAGAGAAGATGGTGAACAAGAGGAAGAAGAGAAGAAAAGAGGGAAACGAAGATGGATTTTCAAGAAGCCTTCGTATCAGGAAACAGTGATACAACACAGTGAAGCAAGCACCATAGTCACAATAACCAATGCTAAAGTTGCCACTAATTCAGAAACCTCAGCACTGAATACCGTTCCCGAAGCTGAGCAAAGATCACATGCCATTGCAGTGGCTATTGCTACTACAGCAGCTGCTCAAGCAGCAGTAGCAACCGCACAAGCTGCTGTAGAAGTTGTTCGGCTCACCAGGCCTTCCGTTTTCTTGAGA…
GH_A08G2051	GH_A08G2051.1	GhiIQD26	ATGGACAAAGCCTCCAAGTGGTTCCGCAGTATCCTCGTTCTCAAAAGAAGAGACTCCCACAAACAACCACCTTCTTCCAAACGTCGTTGGAGTTTCGTTAAATCCTACCGCGAGAAGGACTCCTCCGCCGTCTCCACTGCAACGTCGTCCCTACGCGGTCTTCAGCAACCACTCGAAGATTCTGTTTCTGTTGTTGACGCGAATAGTGGGTATGATGCGGTGGATGATAATAACGACCACGCCATTGCTGTGGCTGCCGCTACTGCCGCCGTTGCCGAAGCAGCCGTTGCGGCTGCTCAAGCTGCCGCTGTGGTGGTTAGGCTCACCGGAAGCAGTGGTAGGTGCGCGCGTGATCCGGTGGCTCACGTTAGCAACAGCTACTGGGCAGGCGAGGAATTA…	GhiIQD26	MDKASKWFRSILVLKRRDSHKQPPSSKRRWSFVKSYREKDSSAVSTATSSLRGLQQPLEDSVSVVDANSGYDAVDDNNDHAIAVAAATAAVAEAAVAAAQAAAVVVRLTGSSGRCARDPVAHVSNSYWAGEELAAVKIQSTFRGYLARRALRALKGLVKLQALVRGHIERKKTAEWLRRMQVFLQTQARARAGRAQISESSRISSKSSHYLHPGPPTPENFEHAVQPKSTKYEQSSMLKRNGSRLSGRTRDNYEQMHPGWYTSDHWIDDQSWDQRGHSTRIGHTDDEKRMTKFLRLILGNPVSPPNAETCFTLHTLH	GhiIQD26	ATGGACAAAGCCTCCAAGTGGTTCCGCAGTATCCTCGTTCTCAAAAGAAGAGACTCCCACAAACAACCACCTTCTTCCAAACGTCGTTGGAGTTTCGTTAAATCCTACCGCGAGAAGGACTCCTCCGCCGTCTCCACTGCAACGTCGTCCCTACGCGGTCTTCAGCAACCACTCGAAGATTCTGTTTCTGTTGTTGACGCGAATAGTGGGTATGATGCGGTGGATGATAATAACGACCACGCCATTGCTGTGGCTGCCGCTACTGCCGCCGTTGCCGAAGCAGCCGTTGCGGCTGCTCAAGCTGCCGCTGTGGTGGTTAGGCTCACCGGAAGCAGTGGTAGGTGCGCGCGTGATCCGGTGGCTCACGTTAGCAACAGCTACTGGGCAGGCGAGGAATTA…
GH_A08G2765	GH_A08G2765.1	GhiIQD27	ATGGGAAAAGCTACAAGGTGGTTGAAGAGCTTATTTGGGATAAAGAACAGCAAAGACTACTTGAATTCCGGTGACCGGAAAGGAAAAAAAGGGTCTAGCATTGGCCGTTCGGGGAGGGATCCCAGCGGCGGATTGTGTCACAGCGTTACAGCGACACCACCACCAAACATGTCACCGGCAGAAGTGTCTATGTCGATAAGGTCATACTACAATGAAACGGAGAAGGAACAAAACAAACACGCAATCGCCGTAGCGGCCGCCACGGCAGCGGCTGCCGATGCTGCGGTGGCCGCGGCGAAAGCAGCTGTGGCGGTCGTGAGGCTGACAAGTCACGGAAGGGGAACCATGTTCGGGCACGAGAGATGGGCTGCTGTTAAAATTCAAACCGCGTTTCGAGGT…	GhiIQD27	MGKATRWLKSLFGIKNSKDYLNSGDRKGKKGSSIGRSGRDPSGGLCHSVTATPPPNMSPAEVSMSIRSYYNETEKEQNKHAIAVAAATAAAADAAVAAAKAAVAVVRLTSHGRGTMFGHERWAAVKIQTAFRGYLARRALRALKGLVKIQALVRGYLVRKQATIRSHKANRFDIRARKSMERLYSFNHTTNGIDENSKIVEVVDIVRPKSRSRRNVNASESDFGDDYQPVHRTLSSPFLSRVPARISIPDGGRDWGLTGDEYRFCTAQNTPRVISSCGSNSNASVAPPPKSVCSDNWFRHYGNYPNYMANTQSFKAKLRSQSAPKQRPEIGPRKRLSLDEMMESRCSLSGVRMQRWCSQV	GhiIQD27	ATGGGAAAAGCTACAAGGTGGTTGAAGAGCTTATTTGGGATAAAGAACAGCAAAGACTACTTGAATTCCGGTGACCGGAAAGGAAAAAAAGGGTCTAGCATTGGCCGTTCGGGGAGGGATCCCAGCGGCGGATTGTGTCACAGCGTTACAGCGACACCACCACCAAACATGTCACCGGCAGAAGTGTCTATGTCGATAAGGTCATACTACAATGAAACGGAGAAGGAACAAAACAAACACGCAATCGCCGTAGCGGCCGCCACGGCAGCGGCTGCCGATGCTGCGGTGGCCGCGGCGAAAGCAGCTGTGGCGGTCGTGAGGCTGACAAGTCACGGAAGGGGAACCATGTTCGGGCACGAGAGATGGGCTGCTGTTAAAATTCAAACCGCGTTTCGAGGT…
GH_A08G2816	GH_A08G2816.1	GhiIQD28	ATGGGTGCTTCAGGGAAATGGGTAATATCTCTTATTGGTCTCAAAAAAACCCAAAAACAACACCAAGTAAGCTCTGGGTTTTCTATGTTATTCCACCGTAAAAATATTTATATACATTTTAAAGATTTAAAGCTCTTTCCTTTTTGTGTGTTTATGTAGGAGAAAGTGAATAGCAACAAGAAATGGAAGCTATGGAGAAAGTTTAGATCAGATTCTCAAAGCTCTGATTCTTTCATTGCTGCCATGGCCGCCATTGTTCGAGCTCCTTATAAAGATTTCAGTTTTTTAAAGCAAGAATGGGCTGCCATTCGCATTCAAACAGCTTTTCGTGGCTTCTTGGTAAAGTTGAAGTCTTTTTTTTTTTTTTCCTTTACATGTTTGGTATCCGGCAAAGTGATG…	GhiIQD28	MGASGKWVISLIGLKKTQKQHQEKVNSNKKWKLWRKFRSDSQSSDSFIAAMAAIVRAPYKDFSFLKQEWAAIRIQTAFRGFLARRALRALKGIVRLQALVRGRQVRKQASVTLRCMQALVRVQARVRARRVRMSIEGQAVRKMLDGHRSKDDVLKQAEDGWCGSKGTLEDVKTKLHMREKGAFKRERTLAYSLAQKQWKSVPGSTTRTNGLIPCLISQEFDKNSWGWNWLERWMVARPLETRLMEQSTRTDPSKTCLESLSGKNERCSEPCSMKARKNNVTTRVSAKPPPHTRQVTRSSSSPSSEFRFDESSGSSSICTSTTPVSGTTVLPSDATGDSGNSRPNYMTMTVSTKAKQRSGNHGFQRQSMDELEFKRSAGFDNGDSKSCAGSDPSVRMSRP…	GhiIQD28	ATGGGTGCTTCAGGGAAATGGGTAATATCTCTTATTGGTCTCAAAAAAACCCAAAAACAACACCAAGAGAAAGTGAATAGCAACAAGAAATGGAAGCTATGGAGAAAGTTTAGATCAGATTCTCAAAGCTCTGATTCTTTCATTGCTGCCATGGCCGCCATTGTTCGAGCTCCTTATAAAGATTTCAGTTTTTTAAAGCAAGAATGGGCTGCCATTCGCATTCAAACAGCTTTTCGTGGCTTCTTGGCAAGGAGAGCATTGAGGGCTTTAAAAGGAATTGTGAGGCTACAAGCTTTGGTTCGAGGTAGACAAGTTCGGAAACAAGCCTCTGTGACGCTTCGATGCATGCAAGCTCTCGTTCGTGTTCAAGCTCGAGTCAGGGCTCGTCGTGTTCGAATG…
GH_A09G1181	GH_A09G1181.1	GhiIQD29	ATGGGTGTCTCAGGAAAATGGATCAAAGCATTGGTTGGCTTGAAAAGAACAGACAAGTCACAATCCTCGGAGAAGAAAGAAAATGTCAGTATGACTAACTATATATATTCTAAACAGTTTCTCCTATTTTGGAGGTTTAGATTGGGTATGTTATTGTGTAATATCACGTGTGCCTCTTCAAAATGAAGTGATGTCTTATTGTCTCAAGTTATCTGGTACAATGGAAAGGGGTGTTTTATGGGAACTTACATGCAGCAATTCTCCTTGTTAGTCAAAAGAAATATATGATTTTGTTCTCTTCAGCCATCCTAGTCAATGATGCTTTATGTCATTATCAGAATAATTGCACCTTTTTTTATGCTTCTTTCTATTCATCTAGTCTTATTGTGGCTTGTAGAA…	GhiIQD29	MGVSGKWIKALVGLKRTDKSQSSEKKENRAATSKFRHRRKHSIEFYTDKLQEELDQNAASPARDANTHAIADAAGFPSGSLEVRDVALNELVMEEWAATRIQTAFRGFLARRALRALKGLVRLQALVRGHAVRKQAAMTLRCMQALVRVQARVRARRVRLTLESETAQQKLQQQLADEARVKEIEEGWCDSIGSVEEIQAKLLKRQEAAAKRERAMAYALAHQWQAGSRQQSVPAGFEPDKSSWGWNWLERWMAVRPWENRFLDINLRDGAVACEDGSAEGKNGANSQIKPATKKPAASNLHANLSNLKVGPSYSEGSDSPPGKSANVVDAVNALSSKPKSKPIIEDLGEEAGSKPVFTSRSRSNPKERSIKSDKLVKKRLSLPNSGEGTGSQTSKPGK…	GhiIQD29	ATGGGTGTCTCAGGAAAATGGATCAAAGCATTGGTTGGCTTGAAAAGAACAGACAAGTCACAATCCTCGGAGAAGAAAGAAAATAGGGCAGCTACTAGCAAATTTCGTCACCGAAGGAAGCATTCCATTGAGTTTTACACAGATAAACTTCAAGAAGAGTTGGATCAGAATGCTGCTTCACCAGCCAGAGATGCTAATACTCATGCAATTGCAGATGCTGCTGGCTTCCCCTCTGGTTCACTTGAAGTGCGTGATGTAGCTCTTAATGAACTTGTAATGGAAGAATGGGCTGCCACAAGGATACAAACAGCTTTCCGTGGGTTTCTGGCTAGAAGAGCACTCCGAGCCTTAAAAGGATTGGTCAGACTGCAGGCCCTGGTGAGGGGTCATGCTGTAAGA…
GH_A09G1366	GH_A09G1366.1	GhiIQD30	ATGGGAAAGAAAAGGTGCTGGTTTAGTTGGGTGAAGAAGATATTCGCTTCTGATGCAAAACCAAAACCGGAAAAGGTTCATTTTTAACTCTTTTTTTTTTGTTGAGAATAATAGCTTTTGGTTTATCAAAAGTTTGATTGTACTTTGCAGAAATCAAGGAGGTGGAAATGGATTTTTAGAAGACTGAAACTAAAGCAACACCACCTTGCACTTCCTGCACCTCAAAAATCATTGTGTGAAGCAAGGGAAGAGCAAAGAAATCATGCTTTAAACGTAGCCATTGCAACAGCTGCCGCAGCGGAGGCCGCAATTGCTGCCGCCCAAGCAGCGGCTGAGGTTGTGCGTCTCACAGTTGCCTCTAACCCTTCTCATCATTTCACTACAATCGACAGAAACTTG…	GhiIQD30	MGKKRCWFSWVKKIFASDAKPKPEKKSRRWKWIFRRLKLKQHHLALPAPQKSLCEAREEQRNHALNVAIATAAAAEAAIAAAQAAAEVVRLTVASNPSHHFTTIDRNLAALKIQTAYRAHLARKALRALKGVVKLQAIVRGRAVRRQALINRKWLQSGTNMNPKVKEKSTSPTKVICQDSRRKQSLMNKDELQDKDIKGQYACNSEKSWNDSVLSKQDIEVNFLRSQEAMAKRERMKKYSYSHRERLNTRMLDELVHVKEAKAEANERERVMISKLDVPSNLSTWEVNGPPHVRHRKLKKQQDTLNGMNPLFSFPRRSFSRTQQSAAGDEGSIPNSPVFPSYMGATECAKAKARSRSTPRQRVGFWDSCFDNSGAYKGGLSLWSTYERAPFSIDESCCL…	GhiIQD30	ATGGGAAAGAAAAGGTGCTGGTTTAGTTGGGTGAAGAAGATATTCGCTTCTGATGCAAAACCAAAACCGGAAAAGAAATCAAGGAGGTGGAAATGGATTTTTAGAAGACTGAAACTAAAGCAACACCACCTTGCACTTCCTGCACCTCAAAAATCATTGTGTGAAGCAAGGGAAGAGCAAAGAAATCATGCTTTAAACGTAGCCATTGCAACAGCTGCCGCAGCGGAGGCCGCAATTGCTGCCGCCCAAGCAGCGGCTGAGGTTGTGCGTCTCACAGTTGCCTCTAACCCTTCTCATCATTTCACTACAATCGACAGAAACTTGGCTGCTCTTAAAATCCAAACTGCTTATCGGGCACACCTGGCAAGGAAAGCACTGAGGGCATTGAAGGGAGTAGTG…
GH_A09G1685	GH_A09G1685.1	GhiIQD31	ATGGGGAAGAAAGGAAAATGGTTGTCTTCTTTGAAGAAAGTGTTCAGCCCAGATTCCAAGGAAAAGAAAAACCAGGTTTGAAGAAAATCCCATTCACCTAATTTTGCCTTTGCAGTAGTTTATAGTCCTCAATGAGTTTTTAGTATTCTTGATTGCTATGTTTTTCAGAAATCAAAACAACAGTTGTTGGAGAAGCAGGTGCATTTGGGTTCCAATGATTCTGGTGCAGCCACTTTAGAAACTGTCAACTTGCCCCCTCCTCCGCCAGAAGAAGTTAAACCGATTGAAGCAGAAAGCAAGCAGACTTACCCTGTGGCAGTTGCCACTGCTGCTGCTTCACCTCAGGCTGCCGTAGAGGTTGTTCAACGTCAGCTTAATAGAGATGCTCTGTTCGCTGGA…	GhiIQD31	MGKKGKWLSSLKKVFSPDSKEKKNQKSKQQLLEKQVHLGSNDSGAATLETVNLPPPPPEEVKPIEAESKQTYPVAVATAAASPQAAVEVVQRQLNRDALFAGKSEEEVAAIKIQTAFRVYLARRALHALKGLVRLKSLMEGPVVKRQAVSTLRCMQTLSRLQCQVRIRRTRMTEENQALQRQLLQKHAKEIVNLQMGEDWDDSLQSKEQIEASLLSKHKAAMRRERAMAYSFTHQQTWKHTSRSMNPLFMDPNNPSWGWSWLERWMAAPPQEGRGTTEKEQNDQSSIRSARSNFGGEISKAYARYQLNLDKQSPKTGQKPNQTSSLLSVSTPKTSASIPARKLKSASPRSSVVGPDDDGRSMVSIQSERNRRHSIAGSSVHDSEGLGSSPSLPSYMVPT…	GhiIQD31	ATGGGGAAGAAAGGAAAATGGTTGTCTTCTTTGAAGAAAGTGTTCAGCCCAGATTCCAAGGAAAAGAAAAACCAGAAATCAAAACAACAGTTGTTGGAGAAGCAGGTGCATTTGGGTTCCAATGATTCTGGTGCAGCCACTTTAGAAACTGTCAACTTGCCCCCTCCTCCGCCAGAAGAAGTTAAACCGATTGAAGCAGAAAGCAAGCAGACTTACCCTGTGGCAGTTGCCACTGCTGCTGCTTCACCTCAGGCTGCCGTAGAGGTTGTTCAACGTCAGCTTAATAGAGATGCTCTGTTCGCTGGAAAATCTGAGGAGGAAGTGGCAGCAATAAAGATTCAAACAGCTTTCCGAGTTTACCTGGCTAGAAGGGCATTGCATGCTTTAAAAGGATTGGTC…
GH_A09G1949	GH_A09G1949.1	GhiIQD32	ATGGGTCTTTTCCGGCGACTCTTTGGAGCCAAAAAGTCCGACAAAACCCGATCCGATAAAGAACGGAGGCGTTGGAGCTTTGCTAGATCTTCCAATCCCACGTCTTCAACTTCCCATATAGATCATGCTCTTACTACTGCTCCATGCGGTGACACCTTGGATGCCAGCAAGCACGCAATAGCAGTAGCAGCCGCCACTGCTGCTGTAGCTGAGGCTGCTCTCGCAGCTGCGCATGCGGCTGCTGAGGTTGTTAGACTGACAAGTGGTGGTGGTGGCCCCGCTGGGAACAACCGACGACTCGTACAGGAGGTAGCGGCTGTTAGGATACAGACCGCTTTTCGAGGTTATCTGGTTAGTATTTTCTTCCTTTTTACCTTCACATCATTTCTTCCTAGCCAT…	GhiIQD32	MGLFRRLFGAKKSDKTRSDKERRRWSFARSSNPTSSTSHIDHALTTAPCGDTLDASKHAIAVAAATAAVAEAALAAAHAAAEVVRLTSGGGGPAGNNRRLVQEVAAVRIQTAFRGYLARRALRALKALVKLQALVRGHFVRKQTADMLRRMQTLVKLQDRARSSRAHVTKSLDSVVKMSRLPRNAVHATSGKDECQLRAYCTKSDGLSILKRCGSNSNFRNIIDLEKARMGSNWLDHWRGESLWNNRREAPLSRRLADDEKSDKILEVDTWKPHLSSQQSHRNVRPSQHFSALDYTQSFTAYDSPRKASGKASNAIPNISSAEVLTLSSMKYPGGKDEAVLRTADNSPQVHSASSRPGSSARRSPFTPTRSECSWGYLSGYSGYPNYMANTESSRAKYR…	GhiIQD32	ATGGGTCTTTTCCGGCGACTCTTTGGAGCCAAAAAGTCCGACAAAACCCGATCCGATAAAGAACGGAGGCGTTGGAGCTTTGCTAGATCTTCCAATCCCACGTCTTCAACTTCCCATATAGATCATGCTCTTACTACTGCTCCATGCGGTGACACCTTGGATGCCAGCAAGCACGCAATAGCAGTAGCAGCCGCCACTGCTGCTGTAGCTGAGGCTGCTCTCGCAGCTGCGCATGCGGCTGCTGAGGTTGTTAGACTGACAAGTGGTGGTGGTGGCCCCGCTGGGAACAACCGACGACTCGTACAGGAGGTAGCGGCTGTTAGGATACAGACCGCTTTTCGAGGTTATCTGGCACGGAGGGCACTGAGAGCTTTGAAAGCATTGGTGAAGCTTCAAGCG…
GH_A09G2303	GH_A09G2303.1	GhiIQD33	ATGGGAAAGAAGGGAAGTTGGTTTTCTGCAATTAAAAAAATTTTCTTTCCACACTCCAAGGAAAAGCTAAATAATGTAAGTTGTTATTCTAACAATGATGCATATGAACTTCACCACTTCATCCGTGCTTTTGTTTCAACTCTACGAATTTATACAATCGTAGATGATATATGGTTGCTTAATTTCGTTCTTTCTCTTGTGTATGAGGTTTAAACATGCCTGTAGGTTGTGCTGGCATGAAAAACAGTTTTATGTTCTCAAACCAGTTTGTGATTACTGAATAGAAGAGCATAAGAACCCGGAATTTTGGAAAAAGGGTCTAAAACACAAGTGGATATAATTAGTTGCCTTTTGATGAACTATAGATGCATCTAATTGGAGTGTGAAATTTCTGATTGA…	GhiIQD33	MGKKGSWFSAIKKIFFPHSKEKLNNESDKRSDKEKKKGTGKLRHGETNSFLPLFRKPSSIEKILGEAEREQNLIFRPPTPPEQPRTPPFMPHRPASPRGPSPRVASPRVASPRAASPPRAASPRAASPPPPPPPPPRAASPRVASPRGASPKPAPSRIVRPRPEPTLKNQHASATQIQAAYRGYKARRSFRALKGLVRLQGVVRGQHVKRQTTNAMKYMQLLVRVQSQIQSRRIQKLENQERQQAQSKEAESTLGKWISQSEAGNENWDDSVLTKEEREARMQRKVEAVIKRERAMAYAYSNQLWKSTPGSGIRSGGFPWWWNWFDHPLPPVNAPGSQGTKSFQLTPPRPNSQLKPSSRPQSSGSRQRQFTYDNIMETPTPKSTRSTILHAARRMRTPP…	GhiIQD33	ATGGGAAAGAAGGGAAGTTGGTTTTCTGCAATTAAAAAAATTTTCTTTCCACACTCCAAGGAAAAGCTAAATAATGAATCGGATAAAAGAAGTGATAAAGAAAAGAAGAAAGGCACAGGAAAATTAAGGCATGGAGAAACCAATTCCTTCCTTCCCCTCTTTAGAAAGCCCAGCAGTATCGAGAAAATTCTTGGGGAAGCTGAACGAGAGCAAAATCTAATATTCAGGCCTCCCACACCTCCGGAGCAGCCAAGAACACCACCTTTTATGCCTCATAGACCTGCATCTCCACGGGGTCCATCTCCTAGGGTTGCCTCTCCTAGGGTTGCTTCTCCAAGAGCTGCTTCCCCTCCACGAGCTGCATCCCCTAGAGCTGCTTCTCCACCTCCACCTCCACCC…
GH_A09G2394	GH_A09G2394.1	GhiIQD34	ATGGGGAAGACAGCGAAATGGTTGAAAAGCTTGTTGACTGGTAAGAAAGACAAAAGTAGAAACATAAGTAATAATCAGAATTCTTCAGTTGTCCCTGAGAATCCAACGACGACCGTTTCGATCCCACTGCCACCGACAACTCCTAAAGAGAAACGACGATGGAGTTTCCGGAGATCTTCGGCTTCAGCGACGCCTGTTAGGGAGTTGAATTCTGTAGAACAAGTGGTTACCCCTTCACCTCCACCACCACCGGCTCCGCCGGTTGTGACCGATGTGATCCGGGTAAGTGGTAGTGCTGATGATGAGAAAGTTGATGCAGGTGAAGAGGCGGCTGCTAAGATGATTCAAGCTGTGTTTCGGTCGTACCTGGTATGTTATAATTTGTTAGATTTGATGGCT…	GhiIQD34	MGKTAKWLKSLLTGKKDKSRNISNNQNSSVVPENPTTTVSIPLPPTTPKEKRRWSFRRSSASATPVRELNSVEQVVTPSPPPPPAPPVVTDVIRVSGSADDEKVDAGEEAAAKMIQAVFRSYLARKALKALKGIVKLQALVRGHLVRRQASVTLKCMQALVTAQARARAQRIRMVEDSRPASRRQSPHRRSTTPDQRLRHGYHEIDSGLEENIKIVEIDHGDSKASLQSRNSYSMEHRFSNHQASPVTSSYLADQISPGACSGHFEDHFFTVAQSSPHYAESETFEYSFCPNYMANTESSRAKARSQSAPKSRPDSIERQPSGRRRSSTEGRNHVPKAMKMKRSSSHVGAAEKNSQYQYQYQYPWSIKLDRSSVSLIDSECGSTSTVLTNTNYCRSHFG…	GhiIQD34	ATGGGGAAGACAGCGAAATGGTTGAAAAGCTTGTTGACTGGTAAGAAAGACAAAAGTAGAAACATAAGTAATAATCAGAATTCTTCAGTTGTCCCTGAGAATCCAACGACGACCGTTTCGATCCCACTGCCACCGACAACTCCTAAAGAGAAACGACGATGGAGTTTCCGGAGATCTTCGGCTTCAGCGACGCCTGTTAGGGAGTTGAATTCTGTAGAACAAGTGGTTACCCCTTCACCTCCACCACCACCGGCTCCGCCGGTTGTGACCGATGTGATCCGGGTAAGTGGTAGTGCTGATGATGAGAAAGTTGATGCAGGTGAAGAGGCGGCTGCTAAGATGATTCAAGCTGTGTTTCGGTCGTACCTGGCAAGGAAAGCTTTGAAAGCGTTGAAAGGG…
GH_A10G0319	GH_A10G0319.1	GhiIQD35	ATGGGTTCTGGAAATGTGTTGAAGACACTAGTGAATATAGTGAAGGATGACAGCTCAAAGCAAGTGAAGGTATATATATCATTATTTTACTTAACAATCATAAGCTAAGTTCTGCAAGCTTTCTGTTATCCTGTTATGAATAAAATCTGAGTTTGGTTCTGAAATAATTCATTTTCTATTTGAATCTTTTGGACTAATGTTATCCAAATTCCAAACCCTTTTGGGAAGTGTAATCTTGTGTACCATTGGAATGACAAATTTTGAGGCTTTTAGTTACTTTTTTCTCAACGAATCCGAGCTCATATTCGGCTATAAGTGTCACTTCTATACCTTCCCTGACACCATTTGTTCAATTTGGTTGTCATATGCCAACATCTGAATATGTGTTTGGATGGTTAT…	GhiIQD35	MGSGNVLKTLVNIVKDDSSKQVKRSSGSTKSKGFKWKKLQRKTSMRTKFIRDSAALGMSIEDLAATRIQTAFRAYRARKKLRLLKGIVRLQAKTRTYSIKKQATTTLHYLHSWSNIQAQIRARRLCMVTEGRLRQKKIANQLKLEAKLHELEVEWSGGPGTMEEVLTKIHQKEAAAVKRERTMAYAFSHQWRAPNSINNGLGSYRLAKANWGWSWVERWIAVRPWERRLPTPSTTPKSTPKEPQNKQTSKGGKNSNSPKPKASVSVKPPLSNAKGAMKPRRLSYPGAEKPAARQVNTKADKINIEKEEIST	GhiIQD35	ATGGGTTCTGGAAATGTGTTGAAGACACTAGTGAATATAGTGAAGGATGACAGCTCAAAGCAAGTGAAGAGATCTTCAGGTTCTACAAAATCCAAAGGCTTCAAATGGAAGAAACTCCAGCGAAAGACTTCCATGAGAACAAAATTTATTAGAGATTCCGCTGCTCTTGGTATGTCAATTGAGGATTTAGCAGCAACTCGGATTCAAACCGCATTCCGAGCCTATAGGGCTAGAAAAAAATTACGTCTATTGAAAGGTATAGTAAGATTACAGGCTAAAACCCGAACTTATTCAATCAAAAAGCAAGCTACAACAACATTACATTATCTTCATTCATGGAGCAACATACAGGCTCAGATAAGAGCTCGTCGACTATGTATGGTAACGGAAGGCCGCCTT…
GH_A10G1560	GH_A10G1560.1	GhiIQD36	ATGGGAAAGAAAGGAAGTTGGTTTTCTGCAATTAAAAGGGTTTTCATACCACACTCCAAGGAAAAGCTAAGTAATGTAAGTTCATATTTTTAACTAGGTGCATATGGACTTCGCTACTTTGTCTATGGTTTTGATTAACTATATGAAAAGAACGTACTAATTGTAGATGTTTTTTATTGTTTAATTTCATTATCTATCTTATATTTTTGTTAGAGAAAAACTTACATTTTGTGTATAAGGTTCAAACATCCAGCAGATAGTTGTGATTGCTGATTAGGTAAACAAAAGAACCCGGCATTGGAAAGATGTCAAAATAGAAATGGGTAGAATTAGTTGCCTTTGGAGAGTGAAATTTCTGATTGAAGACATTTTTGTTGCATAGTCAGCTCTTGAAGTCAA…	GhiIQD36	MGKKGSWFSAIKRVFIPHSKEKLSNESDKRSGKEKKKKGLGKLRHGETNSFIPLFREPSSIEKILGEAEREHKLVFRPPTPPEQPATPPFVPHKDASPRVPSQRIASPRIASPRAASPRTVSPPRAASPRAAPPKVVRPRPEPTLRNHHASATKIQAAYRGYMARRSFRAWKGLVRLQGVVRGQNVKRQTSTAMKRMQLLVRIQSQIQSRRIQMLENQARQEVHFKNDKEVESTLGKLAFSQASETGNEDWDDSVLPKEEIEARMQRKVEAVIKRERAMAYAYSHQLWKTTPKTVHADIRTRGFPWWWNWLERQLSSSNTPESQGIKNFQLTPPRSNSELKPSPEPPLSSKQHQFMFDNMDTPTPKSTRSTTRPMQTPPSRILQGSSSGLSKYSRPRAS…	GhiIQD36	ATGGGAAAGAAAGGAAGTTGGTTTTCTGCAATTAAAAGGGTTTTCATACCACACTCCAAGGAAAAGCTAAGTAATGAATCGGATAAACGAAGTGGTAAAGAAAAGAAGAAGAAAGGCCTAGGAAAATTAAGGCATGGAGAAACCAATTCCTTTATTCCCCTCTTTAGAGAGCCCAGCAGTATTGAGAAAATTCTTGGGGAGGCTGAAAGAGAGCATAAACTAGTATTCAGGCCTCCAACACCTCCAGAGCAGCCAGCGACACCACCTTTTGTGCCTCATAAAGATGCTTCTCCTAGAGTTCCTTCACAGAGGATTGCCTCTCCTAGGATTGCTTCCCCGAGGGCTGCTTCTCCAAGAACCGTTTCCCCTCCACGAGCTGCTTCTCCAAGAGCTGCTCCA…
GH_A10G2676	GH_A10G2676.1	GhiIQD37	ATGGCGAAGAAGAAGAGCTGGTTCAATCTAGTGAAGAGGTTCTTTCTCTTTGAGACACTTATAAATGCACAAAAGGTAACTCCTCACCCCCCCCTTTCCTTTTGCTGTTCTTGTATGGATGAATGGCTGTCATGGATGTTAATATGTTATATATATCTGTCGGTAGGATAACAGAAGGAAATGGATGTTTGGAAGGTTTAGGACCAAAAGGTTAGCATCCATTAAAGCTCCATCACCACCAAGAGACAGCATAAAATATGAAACAGAGGAGGACCAGAAGAAACATGCCTTAACAGTGGCAATTGCCGCAGTGGCTGCTGCTGAAGCAGCTGTTGCAGCTGCTCAGGTTGCAGCCGAGGTTGTTCGCCTCACAGGCAATGACGCCCCTAAAGCTAAAGA…	GhiIQD37	MAKKKSWFNLVKRFFLFETLINAQKDNRRKWMFGRFRTKRLASIKAPSPPRDSIKYETEEDQKKHALTVAIAAVAAAEAAVAAAQVAAEVVRLTGNDAPKAKEEQTNDVKPDCSSSSELGNKFQQLAAIKIQASFRGYLARKALRALKGIVKLQAIIRGRVVRRQALTALKCLQSIVNIQSQVCARRFQIVEGTWQQHDENKELITLKDKILKVDTNSQTRWDNCNGGLKYWLDQWVDTKSKDVEVEDIDSVWTSNRKPTRLKTFSRQYHCDAEGVDSPVRVQGRRSFHGKQSSLGEDSSFITSPVVPTYMAATQSTKAKVRSMSSPKLRPGTCDTQSESYSPYKNKSCLLSSVTSKPNAYEQRSPTLKGVKSKKTLKDLSFNS	GhiIQD37	ATGGCGAAGAAGAAGAGCTGGTTCAATCTAGTGAAGAGGTTCTTTCTCTTTGAGACACTTATAAATGCACAAAAGGATAACAGAAGGAAATGGATGTTTGGAAGGTTTAGGACCAAAAGGTTAGCATCCATTAAAGCTCCATCACCACCAAGAGACAGCATAAAATATGAAACAGAGGAGGACCAGAAGAAACATGCCTTAACAGTGGCAATTGCCGCAGTGGCTGCTGCTGAAGCAGCTGTTGCAGCTGCTCAGGTTGCAGCCGAGGTTGTTCGCCTCACAGGCAATGACGCCCCTAAAGCTAAAGAAGAACAAACCAATGATGTTAAACCTGACTGTTCTTCATCTAGTGAGCTTGGCAACAAGTTCCAACAACTTGCTGCTATAAAAATCCAGGCT…
GH_A11G0174	GH_A11G0174.1	GhiIQD38	ATGGTAAACAAAACACCGACCTCGTGGTTGTCAATGGTGAAAAGGGCTCTCGGGTCTAATGCTAAAGATAACGAGAAAAAAAGTTGCAGAACAAGAGAGAAAAGAAGATGGCTATTTAAATGGTCTCAACAACGTAAACCCAAAACCAAATCACAATCCATTGCAGCTGTTAACATCGTTAGGCTTAATTGCAGAGCTTCCAATTACGCCATTGTTGGAGAAAAAAACCAAGCTGCTATTGTCATTCAAACAGCTTTTAGAGGCTACATAGTAAGTGAAAGATTCTCTCTCTATATATAATTAACTGTTCATTTAGTGTTTTTATTTTTTATTTTTTTTTGTGAAAGGCAAGGAAAGCATTGGGAGCATTGAAAGGGGTAGTGAAGCTTCAAGCTTTAG…	GhiIQD38	MVNKTPTSWLSMVKRALGSNAKDNEKKSCRTREKRRWLFKWSQQRKPKTKSQSIAAVNIVRLNCRASNYAIVGEKNQAAIVIQTAFRGYIARKALGALKGVVKLQALVRGHNVRRRAKVALKCMQSLVRVQNRVLLHQQRARLSYEGCRRAMFIESNSSWESPWLQDLRRRKSITLDKDEKEVEEATKWLDRRRATKQWESHNRASIDKRDSIREPMQLRLPSLRCLKEKSSYHSAANSPRLTMVPNYMAATESAKAKVRSRSTTRQRPGNAERDGGGQISPRSTSDLRWMKL	GhiIQD38	ATGGTAAACAAAACACCGACCTCGTGGTTGTCAATGGTGAAAAGGGCTCTCGGGTCTAATGCTAAAGATAACGAGAAAAAAAGTTGCAGAACAAGAGAGAAAAGAAGATGGCTATTTAAATGGTCTCAACAACGTAAACCCAAAACCAAATCACAATCCATTGCAGCTGTTAACATCGTTAGGCTTAATTGCAGAGCTTCCAATTACGCCATTGTTGGAGAAAAAAACCAAGCTGCTATTGTCATTCAAACAGCTTTTAGAGGCTACATAGCAAGGAAAGCATTGGGAGCATTGAAAGGGGTAGTGAAGCTTCAAGCTTTAGTGAGAGGGCACAATGTGAGAAGACGAGCAAAGGTGGCACTAAAATGCATGCAATCTTTGGTTCGAGTACAAAATCGA…
GH_A11G0321	GH_A11G0321.1	GhiIQD39	ATGGGAAAATCACCGGGAAAATGGATTAAGGCTGTGCTTTTTGGAAAGAAATCTTCCAAAACTGGTTATCATAAAGGAAGGGAGGTAATATTTATTGCTAATTACTACTAAACGAAAAATATAATGTTTAGATTATGTACATGAGGAACTGCAAATATAGTTCCTCTGTCATTTGGTTTATTTTTGGTGGCTTCATTCCCTCTACTGAGAAAGTTAAGTAATTGTAAAGGATTAGCTGATTTGGACGGTAGCTTCCCTGAAATTTCTCGGGAGCTGTTGTATTTAACATGGCTGTTTTGATGCTTTGGTTTTGGGAATGTATCATTCTTTCCTCGAGTTATGAGATAAACATGATATGGCATCTTTCTTCCATCAATCCTAAAATATTAATGTACACTT…	GhiIQD39	MGKSPGKWIKAVLFGKKSSKTGYHKGRENVANVNEVLVSARASEAEVPVAPPFPSQLNQYANERNERDERKLELENKEAANISNDDRISLPVSQGIDSQESTLQYFQNDPERMKQKQAATIVQAAFRGYLARRAFWALKGIIRLQALIRGHLVRRQAIATLCCVMGIVKLQSHIRGVMARRSDGGLEVQKKYNQMNLWESKPVVSLGVNMPARIGKLSANAFARKLVASSPPVMPLHLHDDAGEPNSVCNWLERWSASCFWKPVPQPKKASKLQKKQANGQVVETDSGRPKLSVRRIRPANLDCASVQATSEFDKPKRNLRKVSSRPAEMAVQENPQNELEKVKRNLRKVHNPVVENSVQSQVESDKQKQSLEKFPSATNPDIVEQSLNSLAEKANKEM…	GhiIQD39	ATGGGAAAATCACCGGGAAAATGGATTAAGGCTGTGCTTTTTGGAAAGAAATCTTCCAAAACTGGTTATCATAAAGGAAGGGAGAATGTTGCCAATGTAAATGAGGTGCTGGTTTCAGCCAGGGCATCAGAAGCTGAAGTCCCTGTGGCTCCTCCTTTCCCTTCACAGCTTAATCAATATGCTAATGAGAGAAATGAGAGAGATGAAAGGAAATTAGAACTGGAAAACAAGGAGGCTGCAAATATCTCTAACGATGACAGGATATCACTGCCAGTGAGTCAAGGCATAGATTCTCAGGAATCCACTCTTCAATATTTCCAAAATGATCCTGAAAGAATGAAGCAAAAGCAAGCAGCAACCATCGTTCAGGCTGCTTTTAGGGGTTACCTGGCTCGCCGA…
GH_A11G1049	GH_A11G1049.1	GhiIQD40	ATGGGGAAGAAAGGAGGGACTTCCTGGTTGACTGCTGTGAAAAGGGCTTTTAGATCTCCGACTAAAGACGGTCATGATAAGAGAAGTAACAGAAGAAAGGATGAACCTGACCACCAAGATGAGGATGAAGACAAGGTTTGTATTATAGTATCAATGAACTCTTCATTCATTTCTATACATGAAAACAGAAGAAAACAAAACAAAAATAATAATAATAATAAATGAAGTTGAATCTTTTACAGTAAATATAATTCTTGATCTGTTACTGGTTTTGGTAGAAGAGAGAGAAGCGAAGGTGGATCTTCAGGAAAACTACAATTCAAGAACCGGTGATTCATCAGCAAAAAACACCAGTGAAGGCTACAGGTCGTAATGGTGCAGGTGCAGCATCAGATGGTG…	GhiIQD40	MGKKGGTSWLTAVKRAFRSPTKDGHDKRSNRRKDEPDHQDEDEDKKREKRRWIFRKTTIQEPVIHQQKTPVKATGRNGAGAASDGATATAAEQRYDIPMAATEGAAVVQVARPTRPSNYAREHHLAAIVIQTTFRGYLARRALRALKGLVKLQALVRGHNVRKQAKMTLRCMQALVRVQARVLDQRVRLSHDGSRKSAFSDTNSVLESRYLQDISDRRSLVSREGSSIADDWDERPHTIEEVKAMLEHRKEAALKREQNLSQALSQQMRRARRSPSMGDEDEIDGRPKWLDRRTPAKPWDNRGRASTDHRDSVKTVEIDTSQPYSYLAPTYIRTNSNQYHQHGPQNQRPSSPLHRAQQNAPMHHSPITPSPSKARSIQVRSSSPRCVRGDRSSVSSQTP…	GhiIQD40	ATGGGGAAGAAAGGAGGGACTTCCTGGTTGACTGCTGTGAAAAGGGCTTTTAGATCTCCGACTAAAGACGGTCATGATAAGAGAAGTAACAGAAGAAAGGATGAACCTGACCACCAAGATGAGGATGAAGACAAGAAGAGAGAGAAGCGAAGGTGGATCTTCAGGAAAACTACAATTCAAGAACCGGTGATTCATCAGCAAAAAACACCAGTGAAGGCTACAGGTCGTAATGGTGCAGGTGCAGCATCAGATGGTGCAACCGCAACGGCCGCAGAGCAAAGGTATGATATTCCTATGGCAGCAACCGAGGGTGCAGCAGTGGTACAAGTGGCTCGCCCAACTAGACCTTCAAATTATGCTAGAGAGCACCACCTTGCTGCCATTGTTATTCAGACCACT…
GH_A12G1325	GH_A12G1325.1	GhiIQD41	ATGGGGAAGAAAGGAGGGACTTCATGGTTGACTGCTGTGAAAAGGGCTTTTAGATCTCCTACTAAAGATACCCATGATGATGAAAAGGTAAGTGTTTCAATCTATTTTAATGGCTGTTTATGAATATAAAAAGAAAAGCCTTTGATTTTTTATTTTTTTTATATAGAAGAGAGATAAACGGAGGTGGATCTTTAGGAAACAAGATACAAGTCCTGTGAAGAGTGTAGGTAATAATGGTGGTGGTGGTGGTGGTGCAAGTACGGCAGCAGCGGAGAAAAGGCATGCTATTGCTGTGGCGGTGGCTAAAGCAGCGGAAGCTGAAGCTGCGGTGGCGACTGCAGAAGCAGCTTTACAAGCTGCTCGGTTGACTAAACCTAGTTATGGCAGGAAACATCACTT…	GhiIQD41	MGKKGGTSWLTAVKRAFRSPTKDTHDDEKKRDKRRWIFRKQDTSPVKSVGNNGGGGGGASTAAAEKRHAIAVAVAKAAEAEAAVATAEAALQAARLTKPSYGRKHHFAAIVIQTAFRGYLARRALRALKGLVKLQALVRGHNVRKQAKMTLRCMQALVKVQSRVLDQRMRLSHDGCSRKSAFSDTWESRYLQDISDRRSLSRGGSSIADDWDERPHTVEEVKAMLQHRKEAALKREKSLSQALSQQMRRARRSPSMGGQDEWLDRWMPAKPWDNRGRASMDQRDNVKTVEMDTSQPYSYVAPNYRRTNSNHYHQRPSSPLHRAQHNAQAFHPSPITPSPSKTRPVQVRSASPRCVREDRTSFSSSQTPSLRSNYYYTGRVSTQASTSINNAITLPNYMA…	GhiIQD41	ATGGGGAAGAAAGGAGGGACTTCATGGTTGACTGCTGTGAAAAGGGCTTTTAGATCTCCTACTAAAGATACCCATGATGATGAAAAGAAGAGAGATAAACGGAGGTGGATCTTTAGGAAACAAGATACAAGTCCTGTGAAGAGTGTAGGTAATAATGGTGGTGGTGGTGGTGGTGCAAGTACGGCAGCAGCGGAGAAAAGGCATGCTATTGCTGTGGCGGTGGCTAAAGCAGCGGAAGCTGAAGCTGCGGTGGCGACTGCAGAAGCAGCTTTACAAGCTGCTCGGTTGACTAAACCTAGTTATGGCAGGAAACATCACTTTGCTGCTATTGTTATTCAGACAGCTTTTAGAGGCTACCTGGCCAGGAGAGCTCTACGTGCGTTAAAAGGGCTAGTGAAG…
GH_A12G2604	GH_A12G2604.1	GhiIQD42	ATGGGAAAGAACACTGCTACCTCGTGGTTGTCAATGGTGAAAAAGGCCTTTAGGTCTCCAGGTAAAGATTATGGGAAAAAGAGTAGCAGAAGGAGAGAAGAATGTGGGCATCAGGAAGAGGATGAAAAGGTACGTAGTATATAGTAATTAAAAACTTCATCATTCTCTTAAATTTATTTTTTGTAGTATAATTTATTTAATTGAGTTGGTGGTGGGTGCATGGCTTTTTTTGGGGTTGTGCAGAAGAGGGAGAAAAGAAGATGGCTGTTTAGAAGGGGCAATAGTAATATCAATCATGTCCAACAGTGTGAAGCAAAGACACCAACACCAACAACATCGACAAGTACTGCTGCACCACCTGCGAACAATGCAGCAGAAACAGCATTGGATTTTGCAGAA…	GhiIQD42	MGKNTATSWLSMVKKAFRSPGKDYGKKSSRRREECGHQEEDEKKREKRRWLFRRGNSNINHVQQCEAKTPTPTTSTSTAAPPANNAAETALDFAEQRHAIAVAAAEAAVATAQAAVEIVRLSSRPSNYANVREHYHYAAIVIQTAFRGYLARRALRALKGLVKLQALVRGHNVRRQAKLALKCMQSLLRVQDRVLDQQRARLSHEGYRRKSMFDETNALWETRYLQDIRRRKSMSRDMSCTTDEWDDRPQTSEEIEALLLTKKEAALKREKALAYAFSNQIWRSRRNPSAEDEKEVEERTKWLDRWMATKQWDNNNRVSTDKRDSIKTVEIDSYKLQSYSSPTIRRPHSFFLNQFPPTPSPCKTKPLQVRSASPRCLKEEKCYTSAANTPSLASTYCTT…	GhiIQD42	ATGGGAAAGAACACTGCTACCTCGTGGTTGTCAATGGTGAAAAAGGCCTTTAGGTCTCCAGGTAAAGATTATGGGAAAAAGAGTAGCAGAAGGAGAGAAGAATGTGGGCATCAGGAAGAGGATGAAAAGAAGAGGGAGAAAAGAAGATGGCTGTTTAGAAGGGGCAATAGTAATATCAATCATGTCCAACAGTGTGAAGCAAAGACACCAACACCAACAACATCGACAAGTACTGCTGCACCACCTGCGAACAATGCAGCAGAAACAGCATTGGATTTTGCAGAACAACGGCACGCAATTGCCGTTGCAGCTGCTGAAGCTGCTGTGGCAACAGCACAAGCGGCTGTTGAGATCGTTAGGCTTAGTTCTAGACCTTCCAATTATGCCAATGTTAGAGAA…
GH_A12G2690	GH_A12G2690.1	GhiIQD43	ATGGGAAAGAAAGGGAGTGGATGGTTCTCGACGGTGAAGAAAGTGTTCAAATCTTCTCACAAAGACTTGCCTGACAAAAAAGTAACGTATTTTTTCATTGGTTTTTAGATTATTTTTTTTTGCCTTTTGATGTTTGTTTAGCAGGTTGATTTGATTGCCATATTTCCAAGCAAAAACAATGGCACCTTTCAAGTTTTTTTTTCATTTTAAGGCAATTTTTTAATAAATGCAGGGAAAAAAAAGAGAGAGCAAACATCTACATCACAAACATCTGGATTTTTGCTTGTATTTATTTGGGTTCTTATCTTTTTGTTGTTAGAACTTAGGTTAACTATATAGTGCCCAGGTTTGCAAGTACATTACAAATTCTCTTTGATCTTACTCATTTGTGGTCATAAT…	GhiIQD43	MGKKGSGWFSTVKKVFKSSHKDLPDKKRENNVEKWPNEAPDVVSFEHFPAESSPDITNNESAMSTPLNEDRNHAIAVAMATAAAAEAAVAAAQAAAKVVRLAGYGRQSKEERAATLIQSYYRGYLARTALRALKGLVRLQALVRGYNVRKQAQMTMRCMQALVRVQARVRARRLQLTDHDKIPKRSDEDDEEKKGTGEVERKPRSLLKRYDSWDGGQQSSEKVKESVSKKHDAAMRRERALAYAYGYQQLQPQQQLMQPHPNGKDVGVHLNDREKAQWGWNWLEHWMSSQPYHARQLGHQEGSYMTLPTTTATTTVTDNMSEKTVEMDVVTAMDSGSYSTLQQAQSGSSNVPSYMAPTQSAKAKVRSQGPMIMKQQRVPHAPQWNPSTKKSPGCDSSSS…	GhiIQD43	ATGGGAAAGAAAGGGAGTGGATGGTTCTCGACGGTGAAGAAAGTGTTCAAATCTTCTCACAAAGACTTGCCTGACAAAAAAAGAGAGAATAATGTGGAGAAATGGCCAAATGAGGCCCCGGATGTAGTGTCGTTTGAACATTTTCCGGCGGAGAGTTCACCGGACATCACGAATAATGAGAGTGCCATGTCGACTCCTCTGAATGAAGATAGGAACCATGCCATTGCTGTCGCCATGGCAACTGCTGCTGCTGCAGAAGCAGCTGTTGCGGCAGCTCAAGCTGCCGCTAAAGTCGTCCGGTTGGCGGGTTATGGACGACAATCTAAGGAAGAAAGAGCTGCAACGCTTATACAGTCGTATTATAGAGGCTATCTGGCTCGGACAGCTTTGCGTGCTTTG…
GH_A13G0121	GH_A13G0121.1	GhiIQD44	ATGGGAAAGAAAAGGAGCTGGTTTAGTTGGGTGAAAAAGATTTTTGCTTCTAATGCACAACCAAAAACACAGAAGGTTCATTTTCAGTACTTGTTACTTTTCAACTTTTGCTTCTTTCTTTTTATTTTTTTTTGAATAATTAATAGCTTTTTGATTCATCTTTTTGGTTCTTTTTTCCTTTTTGTTTGTAATAATTTCGGTTCTACTTTTCAGAAATCAAGGAGGTGGAGATGGATTTTCGGAAAACTAAAGCTCAAGCAATGTCGCCCTGCATTGCCGGCGATACCCCAGCAGAAATCGTTATGTCAAGCAACCGAGGATCAAAGAAAGCATGCTTTGAATCTTGCCATTGCGACAGCTGCTGCAGCTGAAGTTGCGGTTGCTGCAGCACAAGCAGCA…	GhiIQD44	MGKKRSWFSWVKKIFASNAQPKTQKKSRRWRWIFGKLKLKQCRPALPAIPQQKSLCQATEDQRKHALNLAIATAAAAEVAVAAAQAAAQVVRLANASNHFSNFTTRDRNRAAIKIQTAFRAHLARKALRALKGLVLLQAIIRGQVTRRRAMKNMKCLQSGTDMYPEIKEKVICQDTRRNQSLVHKDQLQGKDIIKHEYYSRRNWNDSVFSKEDAEAVWLRRQEAMAKRERMKKYSYSHRERVNSYMLDESVHVKETGRNSFVEAEANSEGTRRERMMILKHNVASNSSRWEVHGLHGLNSPYLFPRRSFCRVQNQNPAGNESSVPSSPVFPTYMAATESAKAKVRSMSTPRQRLGLPDTCFDHNMPYKGGLSLWSTYNGETFEYQ	GhiIQD44	ATGGGAAAGAAAAGGAGCTGGTTTAGTTGGGTGAAAAAGATTTTTGCTTCTAATGCACAACCAAAAACACAGAAGAAATCAAGGAGGTGGAGATGGATTTTCGGAAAACTAAAGCTCAAGCAATGTCGCCCTGCATTGCCGGCGATACCCCAGCAGAAATCGTTATGTCAAGCAACCGAGGATCAAAGAAAGCATGCTTTGAATCTTGCCATTGCGACAGCTGCTGCAGCTGAAGTTGCGGTTGCTGCAGCACAAGCAGCAGCCCAGGTCGTTCGTCTGGCTAATGCCTCTAACCACTTCAGTAATTTCACAACAAGGGATAGGAACCGAGCTGCTATTAAGATCCAAACCGCTTTCAGGGCACATCTGGCAAGGAAAGCCTTACGGGCACTAAAGGGA…
GH_A13G0768	GH_A13G0768.1	GhiIQD45	ATGGGAAAATCTCCAGCAAAATGGATCAAGACCTTACTTCTTGGGAAGAAATCTTCAAAGTCCAGTTTCTCAAAAGGAAAAGAGAAGCTGGTGAGGAAGTACTAATTATCTTCAAATATTAAATAGCTTTTGAAATGTTGCATTTTCTAATTTTGTTGATTATTATGTTCAGAAATCTGCAAATAAAGGTGAGGTTTTGGTTTCTTCCAAGGTGACTGTGTCTGACCTATCAGTGGATCCTCCATCAATTTCAGCACCTATTCTAGTGAATAGCGCTAGGAATGTGGTGGACTCTGAGAAGGGTATACCTGCCCAATTGCCAAATGATGGGGCAAATATTCCATCTCCAAAAGTGGATGGAAATGATGCCACAACTGGTAATTTTGGTAACCCAGAAAA…	GhiIQD45	MGKSPAKWIKTLLLGKKSSKSSFSKGKEKLKSANKGEVLVSSKVTVSDLSVDPPSISAPILVNSARNVVDSEKGIPAQLPNDGANIPSPKVDGNDATTGNFGNPENPDRIGLDPAAVTVQAAFRGYLARRAFRTLKGIIRLQAVIRGHLVRRQAVATLCCTWGIVKLQALARGQKVRCSDIAMEIQEKHLRLLQGSKSSDSIGVSTSSKVKNLSNNVFVQKLLASSPSVLPLQLQYVPEEPNSSWQWLLRWTMSHFWVSPLKPVRSGKTKRSIQKLSNAKVVNGSSHSTLEHEKNKRGVRRVSGNSAADSVRKHPQNELERVKRSLRKLSDSSKEVSDKSEVFNEKTKKTPKKTSNSNDPDFSEQESAEKIRDVTATLSELSILEADLKMSLEDPSLGE…	GhiIQD45	ATGGGAAAATCTCCAGCAAAATGGATCAAGACCTTACTTCTTGGGAAGAAATCTTCAAAGTCCAGTTTCTCAAAAGGAAAAGAGAAGCTGAAATCTGCAAATAAAGGTGAGGTTTTGGTTTCTTCCAAGGTGACTGTGTCTGACCTATCAGTGGATCCTCCATCAATTTCAGCACCTATTCTAGTGAATAGCGCTAGGAATGTGGTGGACTCTGAGAAGGGTATACCTGCCCAATTGCCAAATGATGGGGCAAATATTCCATCTCCAAAAGTGGATGGAAATGATGCCACAACTGGTAATTTTGGTAACCCAGAAAATCCTGATAGGATTGGGCTTGACCCAGCTGCTGTGACGGTACAGGCTGCTTTCAGAGGTTATCTGGCTCGCAGGGCATTTCGA…
GH_A13G0771	GH_A13G0771.1	GhiIQD46	ATGGGGAAATCTCCAGCGAAATGGATCAAGACCTTGCTTCTTGGGAAGAAATCTTCAAAGTCCAGTTTCTCAAAAGGAAAAGAGAAGCTGGTAAGGAAGTATTAATTATCTTCAAATGTGAAATAGCACTTGAAGATTGAAAATGTTGCATATTCTAATTTTTGTTGATTATCATGGGCAGAATTCTGCAACTAAAGGTGAGGTTTTGGTTTCTTCCAAGGTGTCTGACCTATCAGCGGATCCTCCATCGATTTCAGCACCTATTCTAGTGAGCCGTGTTAGGAATGTGGTGGACTCTGAGAAGGGTATACCTGACCAATTGCCGATTGATGGGGCAAATATTCCATCTCTAAAAGTGGATGGAAATAATGCCACAACCGGTAATTTTGGTAACCCAGA…	GhiIQD46	MGKSPAKWIKTLLLGKKSSKSSFSKGKEKLNSATKGEVLVSSKVSDLSADPPSISAPILVSRVRNVVDSEKGIPDQLPIDGANIPSLKVDGNNATTGNFGNPENPDRIRLDPAAVTVQAAFRGYLARRAFRILKGIIRLQAVICGHLVRRQAVATLCCTWGIVKLQALARGQKVRCSDIAMEIQEKHPRLLQGLKSSNSIGVSISSMVKNLSNNVFVQKLLASSPSVLPLQLQYVPEEPNSSWQWLQRWTRSQFWEYPSKPIRSGKTKLSVQKLSNAKAVNGSSHSTLEHKKNKRGLRRVSVNSAADSVWEHPQNELERVKRNLRKLSNSSKEVTDKSEFVNEKTKKTLKIYSSSNDPDVLEQESAEKIRDVTATLSELSILEADLKFSSEDASLGEPI…	GhiIQD46	ATGGGGAAATCTCCAGCGAAATGGATCAAGACCTTGCTTCTTGGGAAGAAATCTTCAAAGTCCAGTTTCTCAAAAGGAAAAGAGAAGCTGAATTCTGCAACTAAAGGTGAGGTTTTGGTTTCTTCCAAGGTGTCTGACCTATCAGCGGATCCTCCATCGATTTCAGCACCTATTCTAGTGAGCCGTGTTAGGAATGTGGTGGACTCTGAGAAGGGTATACCTGACCAATTGCCGATTGATGGGGCAAATATTCCATCTCTAAAAGTGGATGGAAATAATGCCACAACCGGTAATTTTGGTAACCCAGAAAATCCTGATAGGATTAGGCTTGACCCAGCTGCTGTGACAGTACAGGCTGCTTTCAGAGGTTATCTGGCTCGCCGGGCATTTCGAATCCTC…
GH_A13G0956	GH_A13G0956.1	GhiIQD47	ATGGGGAAGAAAGGAAAATGGTTGTCTTCACTAAAGAAAGCCTTCACCCCAGAATCCAAGGAAAAGAAAACCCAGGTCTGAAAGAAGTCCAATTCAGCTATAAATTACCCACAGTTTATTAGTCTTCAATGAGTGTTTTTAATTTTCTTTATTGCTATGTTTTTTTTCAGAAATCCAAAGAAAAGGTTTTGGTAAAGCAAGTGGATTGGGGTTCCAATGATTCTGATGCAGCCACTTTAGAAACTCTCAAGTTGTCCCCTCCTCCCCAGCCACAAGAGGCGAAATTAATCGAAGCCGAGGTTGAACCGAGCGAGCAAACTTACCCTGTGGAAGTTGCCATTGCTGCTGCTGCTGCTGTGGCTTTGGCCGCTCCAGCTGAGGCAGTTGCGGATGTCGTTC…	GhiIQD47	MGKKGKWLSSLKKAFTPESKEKKTQKSKEKVLVKQVDWGSNDSDAATLETLKLSPPPQPQEAKLIEAEVEPSEQTYPVEVAIAAAAAVALAAPAEAVADVVRRQSNTGPRFAGKSNEEVAAIKIQTAFRVYLAKRALHALRGLVRLKSMMEGPMVKRQAAGTLRCMQKLSRVQCQIRLRRIRMTEENQALQRQLLQKHAKEIVNLQMGEDWDDSLQSKEQIEASLLSKHEASMRREKAMAYSFTHQQTWKNASRSMNALFMDPNNLSWGWSWLERWMAARPWEGRGMAEKEQNNDQSSVKSGRSSFGGDISKAYARYQLNLDKQSLKASQKPSRTSSLQSPSTPKPVSMPTRKLKSPSPRSSVVAPDDDMRSTVSVLSERNRRHTIGGSSVLDDESLAS…	GhiIQD47	ATGGGGAAGAAAGGAAAATGGTTGTCTTCACTAAAGAAAGCCTTCACCCCAGAATCCAAGGAAAAGAAAACCCAGAAATCCAAAGAAAAGGTTTTGGTAAAGCAAGTGGATTGGGGTTCCAATGATTCTGATGCAGCCACTTTAGAAACTCTCAAGTTGTCCCCTCCTCCCCAGCCACAAGAGGCGAAATTAATCGAAGCCGAGGTTGAACCGAGCGAGCAAACTTACCCTGTGGAAGTTGCCATTGCTGCTGCTGCTGCTGTGGCTTTGGCCGCTCCAGCTGAGGCAGTTGCGGATGTCGTTCGTCGTCAATCCAACACAGGTCCACGGTTTGCTGGAAAATCTAATGAAGAAGTGGCAGCCATCAAAATTCAAACCGCTTTCCGAGTTTACCTTGCA…
GH_A13G1240	GH_A13G1240.1	GhiIQD48	ATGGGAAGAGCAAGGAAATGGCTGATAAGCTTCTTGTTAGGAAGGAAAGATGATAAAGGTAAATGGAAGAACATTTCCAAATCTTTTGAAGATCAAGGAAGTTTGATGGCAATCCCATCTGCAATTCCACCTGCAAGTCCTTTTAGGTGCTTATGGAGTTTTCGGAAGCCGGTGGCCGCGTCTGAAGTTCGAGCTCTTAAAGGTTCGAGGTCTTTCGGTTCAATGATTGCTACTTCACTTGCAAAACCAGCTGTATTGGACATGGAGAATCAACATGACAAGACCAGAGTCTCTTCAGTGGCAATATCTAAAGCAATAGAAGATGTCGCTGCAACGCGGATTCAAGCTGCCTTTCGATCGTATTTGGTACTAAATTACGAATCCTGGGATTTATTATAG…	GhiIQD48	MGRARKWLISFLLGRKDDKGKWKNISKSFEDQGSLMAIPSAIPPASPFRCLWSFRKPVAASEVRALKGSRSFGSMIATSLAKPAVLDMENQHDKTRVSSVAISKAIEDVAATRIQAAFRSYLARKALHALKGLVKLQALVRGQLVRKQATSTLGSMHALMAIQVRARIHRIQMAAEPRLNPKSLLLRYGRFPLEKEFKRAQKDEQHGTFKSSKVETLEQRDPKNYFEELSKQNYKEFSFTTYNSPRHCPPLKSKPTPARSSFSSNEYHYMANTQFQGPKSGHKVNPNNDLHPTSKLKAKEGLQLKK	GhiIQD48	ATGGGAAGAGCAAGGAAATGGCTGATAAGCTTCTTGTTAGGAAGGAAAGATGATAAAGGTAAATGGAAGAACATTTCCAAATCTTTTGAAGATCAAGGAAGTTTGATGGCAATCCCATCTGCAATTCCACCTGCAAGTCCTTTTAGGTGCTTATGGAGTTTTCGGAAGCCGGTGGCCGCGTCTGAAGTTCGAGCTCTTAAAGGTTCGAGGTCTTTCGGTTCAATGATTGCTACTTCACTTGCAAAACCAGCTGTATTGGACATGGAGAATCAACATGACAAGACCAGAGTCTCTTCAGTGGCAATATCTAAAGCAATAGAAGATGTCGCTGCAACGCGGATTCAAGCTGCCTTTCGATCGTATTTGGCAAGGAAAGCATTGCATGCTTTGAAGGGATTA…
GH_A13G1987	GH_A13G1987.1	GhiIQD49	ATGGGAAAGGCAAGCAAATGGTTAGTAAACTTCTTGCTAGGGAGAAAAGATGATAAAGGAAAAAGGAAGAATTTGTCCATATCTTTTGATGAAGAGAATTTGGTTTCATCCCCATCCGCAACTCCATCGTCCGCATCTTCGTTTAAGCGGAGATGGAGTTTTGGGAAGTTGTCGAGTAAAGATCGAGCTCATAAGAGTTCCCGGTCACTTGACTCAATGATTGCAACTCCACTTTTGAAGCAAGCTGTATTCAATATGGAGATCCGGCATGATAACACGAGGGTTTTCACAATGGCCATGATGAATTCTAGCAGAAGGAAAACAAAAGCAAGATATGCAGCAGTGGAAAATGCGGCAGCGACCCAGATTCAAGCCGCTTTTCGTTCGTATTTGGTAATG…	GhiIQD49	MGKASKWLVNFLLGRKDDKGKRKNLSISFDEENLVSSPSATPSSASSFKRRWSFGKLSSKDRAHKSSRSLDSMIATPLLKQAVFNMEIRHDNTRVFTMAMMNSSRRKTKARYAAVENAAATQIQAAFRSYLARKALHALRGLVKLQALVRGYLVRKQTTATLRSMHALMSIQVRARFQRIQMADQSQLDVKSQSLRYGRFLQEMEFKRSQREGINEKHGLVKSQNGLMNYSQMERIEQGIIKYYSGELPILKRQPKHEEFSFTTHNSPRHSPPTSKATPARSSFSSHDYPYMPSYMANTQSSRAKLRSQSEPRQRPALNFKAKSKRITSAEEMDDDILPRYSFSQSKGVADEHQDPWIVKLY	GhiIQD49	ATGGGAAAGGCAAGCAAATGGTTAGTAAACTTCTTGCTAGGGAGAAAAGATGATAAAGGAAAAAGGAAGAATTTGTCCATATCTTTTGATGAAGAGAATTTGGTTTCATCCCCATCCGCAACTCCATCGTCCGCATCTTCGTTTAAGCGGAGATGGAGTTTTGGGAAGTTGTCGAGTAAAGATCGAGCTCATAAGAGTTCCCGGTCACTTGACTCAATGATTGCAACTCCACTTTTGAAGCAAGCTGTATTCAATATGGAGATCCGGCATGATAACACGAGGGTTTTCACAATGGCCATGATGAATTCTAGCAGAAGGAAAACAAAAGCAAGATATGCAGCAGTGGAAAATGCGGCAGCGACCCAGATTCAAGCCGCTTTTCGTTCGTATTTGGCAAGG…
GH_A13G2167	GH_A13G2167.1	GhiIQD50	ATGGGTTCTTCAGGGAAGTGGGTGAAATCTCTTATGGGTGTCAAGAAGAATGAAAAAGAAGACCAAGTAAGCTCCGGGTTTTTTTCTGCTTTGTTTCACAGCTACTATTATTTACATTTCTGCACCTAAGCTCTTTGTTATGAAGGAAAAAATGGGTGTCAAGAGTAAGAAATGGAAGCCATGGGGCTCTAAAGGGAAGTTCAGATCAGATTCTTCACCAAGGACTGCTGCAATGGCAGCACTAGCCCGAGCTCCTGCTAAAGATATCAGGGTTTTAAGGCAAGAAGGGGCTGCCATCCGCATCCAAACTGCTTTTCGTGGTTTCTTGGTAAATTGCAAACACCCGTGTTAGTCTCATAATTTTCATTTCTTTCATTGTTTGGTGTCCGTGAAAGTGAA…	GhiIQD50	MGSSGKWVKSLMGVKKNEKEDQEKMGVKSKKWKPWGSKGKFRSDSSPRTAAMAALARAPAKDIRVLRQEGAAIRIQTAFRGFLARRALRALKGIVRLQALVRGRQVRKQATVTLRCMQALVRVQARVRARRVRMSTEGRAVQKILDECHSKDDILKQAEDGWCDSKGTLEDAKTKLQMKQGGAFKRERALAYSLAQKQWRSKPGSTSQTNNSGLYTKYQEFDKNSWGWSWLERWMAARRWEIFRYNLTIKTLLRGKECEIFFPMLCGSQKEQYQHKDFCKASKYWASDSFLFKSKFRVSVQFKFSFIFNMHVFYTCFWKHYLEQYR	GhiIQD50	ATGGGTTCTTCAGGGAAGTGGGTGAAATCTCTTATGGGTGTCAAGAAGAATGAAAAAGAAGACCAAGAAAAAATGGGTGTCAAGAGTAAGAAATGGAAGCCATGGGGCTCTAAAGGGAAGTTCAGATCAGATTCTTCACCAAGGACTGCTGCAATGGCAGCACTAGCCCGAGCTCCTGCTAAAGATATCAGGGTTTTAAGGCAAGAAGGGGCTGCCATCCGCATCCAAACTGCTTTTCGTGGTTTCTTGGCAAGAAGAGCTTTGAGAGCTTTAAAAGGAATCGTGAGGCTTCAAGCATTAGTTCGCGGCCGACAGGTGAGGAAACAGGCCACCGTAACGCTTCGGTGTATGCAAGCTCTCGTTCGTGTCCAAGCTCGTGTTAGGGCTCGTCGTGTGCGG…
GH_D01G0541	GH_D01G0541.1	GhiIQD51	ATGGGTTCAGGAAACTGGCTTAGATCATTCATTTGTTTAAAGAAATATAAACCAAACAGATCCAAACAAGCAAAGGTAGTACATGTGTTTTGCAATGACGCATTAATCCAACATGCTCGTGTTAGACACTGCATATCACTAATATGGTCACAGACCCCATCAATACAGGTACACTCGAGTAATGAAAAATCAAATGGTGATGAAAGGGTAGAAGAACATGAGGGTCCTGAAGTGGCAGCGGCTGGGAGTTCACAAAGCAGTCCTGGAATTGCCGTTGAACAAAGAGCGGCTGCTAAAATTCAGAAGGCATTTCGGTCTTACAGGGTATTTTTAATTTTTTGCCAAATTCCAATTTCATACATATTTCCAAGTGGACATTTGGGTGGTTTTGCATATAAA…	GhiIQD51	MGSGNWLRSFICLKKYKPNRSKQAKTPSIQVHSSNEKSNGDERVEEHEGPEVAAAGSSQSSPGIAVEQRAAAKIQKAFRSYRARKAVRRLRDAGRFKNILIQGHTVKKQTTSTLSYLHSWCNVQSQIRARRICMVTEGRLKQKKMENQMKLEAKLHELEVEWCAGSETMEEILSRIQQREEAAVKRERAMAYAFSHQWRANASQYLGQASYGAGKENWGWSWIERWIAARPWEVRIHSQPIHPKKTHGRQASKSEKEMKVLASVKPCLPNGKVAPKAKNGAPSDG	GhiIQD51	ATGGGTTCAGGAAACTGGCTTAGATCATTCATTTGTTTAAAGAAATATAAACCAAACAGATCCAAACAAGCAAAGACCCCATCAATACAGGTACACTCGAGTAATGAAAAATCAAATGGTGATGAAAGGGTAGAAGAACATGAGGGTCCTGAAGTGGCAGCGGCTGGGAGTTCACAAAGCAGTCCTGGAATTGCCGTTGAACAAAGAGCGGCTGCTAAAATTCAGAAGGCATTTCGGTCTTACAGGGCAAGAAAAGCAGTCCGCCGGCTGAGAGATGCGGGGAGATTCAAGAACATATTGATACAGGGACATACAGTGAAGAAACAAACAACAAGCACGCTAAGCTATTTACATTCATGGTGCAATGTCCAGTCTCAAATCCGAGCTCGGAGAATATGT…
GH_D01G1150	GH_D01G1150.1	GhiIQD52	ATGGGAAAATCCACTTCCTGTTTCAAACTCATCACTTGCGGCAGCGATTCCGCTGAAAAAGACGACGCCATTGATGCCCCTGAGGTAAATTACGGCTGAATTTCCCCCTTGTTTTTTGTTACTTTGCGTTGAATTAGTATTTCATGTGCTGTTTCGAATTGCATTTCACCTTTTAGTTTAATTTTTGGATTTGGTCGAGGAATGGGAGTTTGAAAACTTGCCTTACACCAGAATTTTAAGATCTGAGAAATCCTGCCTTAGCATTTTTTTATCAGCAATGTCTAAGCTGCCTTTTTTAACTCTGACTATTTTCCATAATTTTTGAAATGCAAATAGTTTTCTCGGTATCAAGTTTCGAATCTCTCAAAGTTTTTTAAACTTTATCTTTTTTTAACTGGT…	GhiIQD52	MGKSTSCFKLITCGSDSAEKDDAIDAPENKRSSDKKGWSFRKRSERHRVLSNSVIQVTTTTGLKESQDSVGFEFQQQDVSVASEKTSTVQYTEEKPQLMTPKEYIEEKSQLLALKEYTEEKSHSLTPIELAEEKSQLLAPIKCTEEKSQLTPEPEESKVPEPITATTNEAEDDFSLDESVVVIIQTAIRGFLAQKELGKLKNLVKLQAAVRGHLVRRHAVGTLRCVQAIVKMQLLVRARQSQEGSYVEKLDGKHQGVNQRLQGNSATKKNLTYNSMEKLLSNRFAHQLMDSTPKTKTIHFKCDSSKPNSAWSWLERWMSVSSSEKASKAELPIEQPEQKKTEDCDSPRTPAVPSENISASNEPKPQVRETMVSSESEDNLITYDAANFKFEACQPSSSS…	GhiIQD52	ATGGGAAAATCCACTTCCTGTTTCAAACTCATCACTTGCGGCAGCGATTCCGCTGAAAAAGACGACGCCATTGATGCCCCTGAGAATAAGAGATCAAGTGACAAAAAGGGATGGAGTTTTCGGAAGAGATCTGAACGGCATCGAGTGCTTAGCAACTCTGTGATACAAGTAACTACCACTACAGGACTTAAGGAAAGTCAAGACTCTGTTGGCTTTGAGTTTCAACAGCAAGATGTCTCGGTTGCTTCTGAGAAAACCTCCACTGTTCAGTACACTGAAGAGAAACCTCAGCTGATGACACCAAAAGAGTACATTGAAGAAAAATCCCAGTTGCTGGCACTAAAAGAGTACACAGAAGAAAAATCTCACTCGCTGACGCCTATAGAACTTGCTGAAGAA…
GH_D01G2410	GH_D01G2410.1	GhiIQD53	ATGGGAAAGAAAGTAAAATGGCTATCTTCTTTAAAGAAAGCCTTCAATCCAGAGTCAAAGGAAAAGAAAAACCAGGTTTGAAAATTTTCAATTCAGTCCATAATTCATGTTAAATTTCTGGTCAACCCACATGTACTTAATTTCAATGTTTTTTTGGGGGGTCAATTTGTGATTTTGATCCTTTTGTTATACTCAAATTTGAGATTTGTTTAATTTGGTATAAGGCGTCGATTATTTAGACTAATGAGATTATAAAAGGGTAAAGTAGCTAGGAGGTCCCTGTATTGTAGGGGCTGGATCAAATTCATCCCTCTATTATTAAATGAATTAATTGAGTCCCTATACTGTTAACAATTTGTAACAGAGTTAACATTTACTGTGTAAAAAATGTCTTAAAAA…	GhiIQD53	MGKKVKWLSSLKKAFNPESKEKKNQILDKQVHLGPSSSNAAAPTLETVNLSPPPQPEDEKIIKPETVAEATDDDVVVAPAVPTPAAVTVVQRRLNTDSRFAGKSMEEVAAIKIQTAFRVYMAKRALRALRGLVRLKSLMEGPAVKRQATSTLRCMQTLSRVQCQIRMRRIRMTEENQALQRQILQKHAKELVNLQMGEDWDDSLQSKEQIEASLLSKHKAAMRRERAMAYSFTHQQTWKNGSKSMNPLFMDMNNPTWGWSWLERWMAARPWEGHGVTGKEPNNDQSSVKNAHFEGEISKAYARYQLNLDNKQSPKSSQKPNRTSSHLSPSPKPPSTPSRKLKSASPSGSIIAPDDDTRSIVSVQSERNRRHSIAGSSVRDDESLASSPSLPSYMVPTKS…	GhiIQD53	ATGGGAAAGAAAGTAAAATGGCTATCTTCTTTAAAGAAAGCCTTCAATCCAGAGTCAAAGGAAAAGAAAAACCAGATTTTGGATAAGCAAGTGCATTTGGGTCCTAGTAGTTCTAATGCAGCTGCACCCACATTAGAAACTGTTAATTTGTCCCCTCCACCTCAGCCGGAAGATGAGAAAATAATCAAACCCGAGACGGTTGCTGAAGCTACCGATGATGATGTTGTTGTTGCTCCAGCGGTTCCGACCCCGGCTGCTGTTACGGTCGTTCAACGCCGACTTAATACAGATTCTCGGTTTGCTGGAAAATCTATGGAGGAAGTTGCAGCGATCAAAATTCAGACAGCTTTTCGAGTTTACATGGCGAAAAGAGCATTGCGTGCTTTACGAGGACTTGTG…
GH_D02G0104	GH_D02G0104.1	GhiIQD54	ATGGGAAAGAAAGGAAGTTGGTTTTCTGCAATCAAAAGAGTTTTCGTATCGAATTCGAAGGAGAAACTAAATATTGTAAGTCGGTATTTCGATGTTTTTAAGGTTGAAGTCGGTTTTGTTATGTATGTCACCTATTGAGATTTATGTCCTAATAGATTGTTATGCAGCATGTATGTCGTAAAATCGGAATTTTTACGGCTTGTTTTGTTTCGTTGAATCGTTTTAGGAATCGGATAAAAAGGGCGGTAAAGAAAGGAAGAAGAAAGGTCAAGCAAATTACAAGCATGGAGAAGCTAATTCCTTCATTCCCCTGTTTAGGGAACCGAGTAGTATCGAGAAAATTCTTGGGGAGGCTGAAAGAGATCGGAAACTATCGTTCCGGCCTTCAACACCACCGGA…	GhiIQD54	MGKKGSWFSAIKRVFVSNSKEKLNIESDKKGGKERKKKGQANYKHGEANSFIPLFREPSSIEKILGEAERDRKLSFRPSTPPDQLRTPPFMLPRAASPRVRSQRIASPRAASPKTASSPRANSPRAASPFLPPPPRAASPRAGPPRLVRPRLEPTLRNHHASATKIQAAYRGYMARRSFRALKGLVRLQGVVRGHNVKRQTITAMKYMQLLVRVQSQIQSRRIQMLENQARRQAQFKKDKEAESGFGKWTFGQSETGNENWDDSLLTKEEMEARMQRKVEAVIKRERAMAYAYSHQLWKDAMKSPHTGVPNIRSGVFPWWWNWLERRLPPTDLPENQATKTFQFTPTMPNSELKPSPRPQSSQFTFDNIIDIPTPKSTRSTILPTTRPMQTPTPPSKLV…	GhiIQD54	ATGGGAAAGAAAGGAAGTTGGTTTTCTGCAATCAAAAGAGTTTTCGTATCGAATTCGAAGGAGAAACTAAATATTGAATCGGATAAAAAGGGCGGTAAAGAAAGGAAGAAGAAAGGTCAAGCAAATTACAAGCATGGAGAAGCTAATTCCTTCATTCCCCTGTTTAGGGAACCGAGTAGTATCGAGAAAATTCTTGGGGAGGCTGAAAGAGATCGGAAACTATCGTTCCGGCCTTCAACACCACCGGATCAACTTAGAACACCACCTTTCATGCTTCCTAGAGCTGCGTCTCCTCGTGTTCGTTCTCAAAGGATTGCCTCTCCAAGGGCTGCTTCTCCGAAGACTGCTTCTTCTCCACGAGCCAATTCACCTAGAGCTGCTTCTCCGTTTCTGCCTCCA…
GH_D03G0046	GH_D03G0046.1	GhiIQD55	ATGGGCACTGCTAGAAACTGGTTCAACACAGTTAGAAAGAAGTTCATCAAATCATCCCACCAAAGAGATATCGTCATTCCTCATAGCGAAAATCTCAGCCAGCAGTCAATGATCAAAGAAGTTAGATACTTCCCCAATATTTCACCTTCATCGAGATCATCATTTCAGACAAAAAATTTAACCAGAGAGGATATTGCAGCAATTAAGATCCAATCAGTTTTCAGGGGTCATCTTGTAACTACAATAACTTATATTTCTTTTTCAAACACTTTAGATGTAAACTAACCATTTCGTGTTCTCTAATGATGAACAGGCAAGACGAGCATATAGAGCATTGAGAAGCCTGGTTAAGCTGCAAGCAGTGGCCCGAGGGGCGTATGTAAGGAAACAAGTACAAAT…	GhiIQD55	MGTARNWFNTVRKKFIKSSHQRDIVIPHSENLSQQSMIKEVRYFPNISPSSRSSFQTKNLTREDIAAIKIQSVFRGHLARRAYRALRSLVKLQAVARGAYVRKQVQIAMNCMHALVRLQVKVRARQLLGRYSE	GhiIQD55	ATGGGCACTGCTAGAAACTGGTTCAACACAGTTAGAAAGAAGTTCATCAAATCATCCCACCAAAGAGATATCGTCATTCCTCATAGCGAAAATCTCAGCCAGCAGTCAATGATCAAAGAAGTTAGATACTTCCCCAATATTTCACCTTCATCGAGATCATCATTTCAGACAAAAAATTTAACCAGAGAGGATATTGCAGCAATTAAGATCCAATCAGTTTTCAGGGGTCATCTTGCAAGACGAGCATATAGAGCATTGAGAAGCCTGGTTAAGCTGCAAGCAGTGGCCCGAGGGGCGTATGTAAGGAAACAAGTACAAATAGCAATGAATTGCATGCATGCACTTGTCAGGTTACAGGTCAAGGTTCGCGCCCGCCAACTCCTGGGCAGGTACAGTGAG…
GH_D03G0607	GH_D03G0607.1	GhiIQD56	ATGGGGAAGACTACAAGGTGGCTCAAGTCAGTTTTAGGCATGAAAAAGGAAAAAGAAAAAACCCCCATTCAGCATTCAGTTTTATACGACAAGAATGACAAGAAAAGGTGGAGTTTTGCCAAGTCCGGGAAAGATGTCGACGCAAATTCTCAAACCCCATCGGCCGTCACTGATGCCGCTTGGCTTAGGTCCTACTTTGCCGAAACCGAGAAAGTGCAGAACAAACATGCCGTTGCTGTGGCTGCTGCTACAGCAGCTGCAGCCGATGCAGCTATGGCAGCAGCACAAGCTGCCGTCGCAGTCGTCAGGCTGACCAGCAATGCTAGAAATTCTTTCTTGGCTGGAGGGAAGGAGAAGTGGGCAGCTGTTAAAATTCAAGCCGCCTTTAGAGGTTACTTG…	GhiIQD56	MGKTTRWLKSVLGMKKEKEKTPIQHSVLYDKNDKKRWSFAKSGKDVDANSQTPSAVTDAAWLRSYFAETEKVQNKHAVAVAAATAAAADAAMAAAQAAVAVVRLTSNARNSFLAGGKEKWAAVKIQAAFRGYLSRKALRALKGLVRLQALVRGYLVRKRAAATLHSMQALIRAQSTVRSQRMRRSFNKENRYHSENQPRKSIERFDEWRSEINAYDDNPKIVEIDTLKTRSRSHRFNTALSECGDDLPYQTISSPLPRLVPPRTSLPHYQNLNDFEWCFSGGDECRFATAHNTPRFGNAGRSNAPTTPTQSVCGDGYFRPYSNFPNYMTNTQSFKAKLRSYSAPKQRPESGGAKKRLSLNEIMAARNSISGVRMNKSYYQIHHQF	GhiIQD56	ATGGGGAAGACTACAAGGTGGCTCAAGTCAGTTTTAGGCATGAAAAAGGAAAAAGAAAAAACCCCCATTCAGCATTCAGTTTTATACGACAAGAATGACAAGAAAAGGTGGAGTTTTGCCAAGTCCGGGAAAGATGTCGACGCAAATTCTCAAACCCCATCGGCCGTCACTGATGCCGCTTGGCTTAGGTCCTACTTTGCCGAAACCGAGAAAGTGCAGAACAAACATGCCGTTGCTGTGGCTGCTGCTACAGCAGCTGCAGCCGATGCAGCTATGGCAGCAGCACAAGCTGCCGTCGCAGTCGTCAGGCTGACCAGCAATGCTAGAAATTCTTTCTTGGCTGGAGGGAAGGAGAAGTGGGCAGCTGTTAAAATTCAAGCCGCCTTTAGAGGTTACTTG…
GH_D03G1733	GH_D03G1733.1	GhiIQD57	ATGGGTAAAGCTTCCAAGTGGTTCCGCAGCATCCTCGGCTTCAAAAAATCCGACCCCCATAACCAACCTTCTCCTTCTTCTTCAAAACCAACTTCCCATAAAGACAAACGGCGTTGGAGTTTCGTCAAATCGTACCGTGAAAAAGACTCCTCCACGAACAATAGTAATGCGAAGTTGCCGTCGTCTTCGCAGCAACAGAAAGACTCTGTTTCCTTCGTTGAAAGGAAAGGTGACAATGAAGTAACGGATCCTAGCAAGCACGCCATCGCTGTTGCTGCCGCTACTGCCGCCGTTGCCGAAGCAGCCGTTGCGGCTGCTCAAGCTGCCGCTGCGGTGGTTAGGCTCACTAGTAACAGTGGTAGGTGCGCGCGTGAATCGGCAGCGGTTTACGTTTGCAAC…	GhiIQD57	MGKASKWFRSILGFKKSDPHNQPSPSSSKPTSHKDKRRWSFVKSYREKDSSTNNSNAKLPSSSQQQKDSVSFVERKGDNEVTDPSKHAIAVAAATAAVAEAAVAAAQAAAAVVRLTSNSGRCARESAAVYVCNNNSYIAHDESSAIKIQSAFRGYLARRALRALKGLVRLQALVRGHIERKRTAEWLRRMQALLRAQARARAGRAQISESSQSSCKSSHFHHPDPATPEKFEHVIRSKGTKYEQSSMLKRNGSKSSGRTVDNQEKLHSGWYRRVDEQTWEHSTRIGPNDDEKNDKILEVDTGKPNFISKRRNLFHSTHLSLNSDLYSCSFTNSRDSHQTAPSPSSGEVQSLTPLMLSHSEAIQESPFCGAVDDNSPQFYSASSKGASSKRSPFTPAKSD…	GhiIQD57	ATGGGTAAAGCTTCCAAGTGGTTCCGCAGCATCCTCGGCTTCAAAAAATCCGACCCCCATAACCAACCTTCTCCTTCTTCTTCAAAACCAACTTCCCATAAAGACAAACGGCGTTGGAGTTTCGTCAAATCGTACCGTGAAAAAGACTCCTCCACGAACAATAGTAATGCGAAGTTGCCGTCGTCTTCGCAGCAACAGAAAGACTCTGTTTCCTTCGTTGAAAGGAAAGGTGACAATGAAGTAACGGATCCTAGCAAGCACGCCATCGCTGTTGCTGCCGCTACTGCCGCCGTTGCCGAAGCAGCCGTTGCGGCTGCTCAAGCTGCCGCTGCGGTGGTTAGGCTCACTAGTAACAGTGGTAGGTGCGCGCGTGAATCGGCAGCGGTTTACGTTTGCAAC…
GH_D04G0099	GH_D04G0099.1	GhiIQD58	ATGGGTGCCTCAGGAAAATGGTTTAAATCGCTTATAACTTTCAAACCACTTCAAGATCCTACTAATCAAGTAACTTCACACTAGGTTTACCTCTTTTTTCTTTCTTCTTTTTATTTATGCTTTCATGGTTTCATTTTTCTGTTAATTGGGTTTGTAGGAGAAGGTGGGAGATAAGACGAAGAAGAAGTGGAGGCTATGGAGGAGCTCATCCGAAGGGTTGGGATCTATCTCATCAAAGGTTCCCAGGATGCACCACGTGGCTGCTTCAGAGGCCTCTGATTCATCTTTGTTGGTGGATGATGTGCTCGCTTCAGCTATGGCTACTGTTGCTCGTGCTCCACCCAAAGATTTCAGAGCTGTTAAGCGGGAATGGGCCGCCATTCGAATCCAGACCGCATT…	GhiIQD58	MGASGKWFKSLITFKPLQDPTNQEKVGDKTKKKWRLWRSSSEGLGSISSKVPRMHHVAASEASDSSLLVDDVLASAMATVARAPPKDFRAVKREWAAIRIQTAFRALLARRALRALKAVVRIQAIFRGRQVRKQAAVTLRCMQALVRVQARVRAQCVTSSEGQAMPKLMDEDPAKQAERGWCDSLGTLEELRAKQQMRQQGAIKRERAVAYSVLKQQSRSCASPNARANKQPYSHNHQRLDRNSPDWNWLDRWTATKPWDTRAMEEGTEPAEMVMMMNTISRKSEDNNFSFHSSSYEHEPLKVKRNNVTTRILARPPTSMQTSGSLSAPSSESVYEETSTSTSSASPTTLSSNTPVAGTLEDNHAQKPSYMNPTESIKAKQKKTFRFSPDNVRRRHVVD…	GhiIQD58	ATGGGTGCCTCAGGAAAATGGTTTAAATCGCTTATAACTTTCAAACCACTTCAAGATCCTACTAATCAAGAGAAGGTGGGAGATAAGACGAAGAAGAAGTGGAGGCTATGGAGGAGCTCATCCGAAGGGTTGGGATCTATCTCATCAAAGGTTCCCAGGATGCACCACGTGGCTGCTTCAGAGGCCTCTGATTCATCTTTGTTGGTGGATGATGTGCTCGCTTCAGCTATGGCTACTGTTGCTCGTGCTCCACCCAAAGATTTCAGAGCTGTTAAGCGGGAATGGGCCGCCATTCGAATCCAGACCGCATTTCGAGCCTTGCTGGCAAGACGAGCTCTAAGGGCGTTGAAAGCAGTAGTGAGGATTCAAGCTATATTCCGGGGTCGTCAAGTCCGAAAG…
GH_D04G0861	GH_D04G0861.1	GhiIQD59	ATGGGAAAAAAAGGTGGCTGGTTTTCTATTGTGAAGAAAGCTTTGAGCCCTGAATCCAAGAAATCTCAGGTTTCAATGATTTAATTCATAATCTAATGGATTTCTTTTTTCGGTTTGGGTTTTCTTAGATTTGTTGTTTTTAATTAATTTCAGCACCAAACTCCAAAGCCAAAGAAAAAATGGTTCGGAAAAAGCAAAGATTTGGGACCTGTGTCTGTGCCTGAAGAAACTGAAGTGATAACTGAAGATGTAAAGTTAAAAGAAGCTGAAAACGAACAAAGCAAACATGCCTACTCTGTGGCTCTTGCAACCGCTGTGGCGGCCGAGGCCGCGGTGGCAGCTGCTCAGGCGGCTGCTGAAGTTGTCCGTCTCACTTCTCAGCCGCGCCGTCTGGGGAAG…	GhiIQD59	MGKKGGWFSIVKKALSPESKKSQHQTPKPKKKWFGKSKDLGPVSVPEETEVITEDVKLKEAENEQSKHAYSVALATAVAAEAAVAAAQAAAEVVRLTSQPRRLGKSKEEIAAIRIQTAFRGYLARRALRALRGLVRLKSLIRGQSVKRQATTTLRCMQTLARLQSEISARRIRMSEENQALQRQLQQKCQKELEKLRAPMGEDWNDSTQSKEQIEARQQNKQEATMKRERALAYAYCHQRSWKNCSRSVNQTFMDPSNSHWGWSWLERWMAARPWEVRSTTDNNDRGSVKSMGARSISISEISRAYSRRDLNNDNKPSPTPQKSSRVPSHQSPSTPPSKAPSISSVSGKTRLPSPRGSQWGGYEDSRSILSTRSDRYRRHSIAGSSMRDDESLTSSPAV…	GhiIQD59	ATGGGAAAAAAAGGTGGCTGGTTTTCTATTGTGAAGAAAGCTTTGAGCCCTGAATCCAAGAAATCTCAGCACCAAACTCCAAAGCCAAAGAAAAAATGGTTCGGAAAAAGCAAAGATTTGGGACCTGTGTCTGTGCCTGAAGAAACTGAAGTGATAACTGAAGATGTAAAGTTAAAAGAAGCTGAAAACGAACAAAGCAAACATGCCTACTCTGTGGCTCTTGCAACCGCTGTGGCGGCCGAGGCCGCGGTGGCAGCTGCTCAGGCGGCTGCTGAAGTTGTCCGTCTCACTTCTCAGCCGCGCCGTCTGGGGAAGTCAAAGGAGGAAATAGCTGCTATCAGGATTCAAACAGCATTTCGTGGATATTTGGCTAGGAGGGCACTGCGAGCTTTGAGAGGG…
GH_D04G1282	GH_D04G1282.1	GhiIQD60	ATGGGAAAGAAAGGGAAATGGTTGTCCTCTCTAAAGAAAGCCTTCTTCTCAGAGTCCAAGGGAAAGAAAAACCAGGTTAGGATAAGTCTCGTTCAGCTAAAAATCATCTGTAGTTTCATGGTTAGCTCAGTTTTTAATATTCTTGATTACTATGTTTCTCAGAAATCAAAAGAACAATTTTTGGAGAAGGTGCATTTGGATCCCACTGGTTCTGATGCAGCCAAGTTATCCCCACTTCCTCAGCCTGAAGAGGTGAAATTAATTGAACCTGAAGTTGAGCAAAGCAAGCAGACTTACCCTGTGGCAGTTGCCAATTCTCCTGCCGTTCCAGCTCAGGTTGCTCTACAGGCCATTCGACATCAACTTAATACAGATGCTAGGTTTGCCGGAAAATCTAAG…	GhiIQD60	MGKKGKWLSSLKKAFFSESKGKKNQKSKEQFLEKVHLDPTGSDAAKLSPLPQPEEVKLIEPEVEQSKQTYPVAVANSPAVPAQVALQAIRHQLNTDARFAGKSKEEVAAIKIQAAFRAYLAKRALRALRGLARLKSLMEGPAARRQAAGSLRCLQTLSRMQCQIHARRTRMMEENQALQRQLLQKHAKEIVNLQMGEDWDDTVRSKEQIEASLLSKHEAAMRRERAMAYSFTHQQTWKNASRSMNPLFMDPSNPSWGWSWMERWMTARPWEVRGGMRDKEHLDDQSSLKSARSNFGGEISKAYARYQLNLDKQSTKANQKPSRTSSLLSPSTPKSASIPARKLKSASPRSGVAGLDDETRSIVSMKSDRNRRHSIAGSSVRDNESLANSPSLPSYMVPT…	GhiIQD60	ATGGGAAAGAAAGGGAAATGGTTGTCCTCTCTAAAGAAAGCCTTCTTCTCAGAGTCCAAGGGAAAGAAAAACCAGAAATCAAAAGAACAATTTTTGGAGAAGGTGCATTTGGATCCCACTGGTTCTGATGCAGCCAAGTTATCCCCACTTCCTCAGCCTGAAGAGGTGAAATTAATTGAACCTGAAGTTGAGCAAAGCAAGCAGACTTACCCTGTGGCAGTTGCCAATTCTCCTGCCGTTCCAGCTCAGGTTGCTCTACAGGCCATTCGACATCAACTTAATACAGATGCTAGGTTTGCCGGAAAATCTAAGGAGGAAGTGGCGGCAATCAAAATTCAAGCAGCTTTCCGAGCTTACCTTGCAAAAAGGGCATTGCGTGCTTTAAGAGGACTGGCTAGG…
GH_D05G0268	GH_D05G0268.1	GhiIQD61	ATGGGGAGAGCTTCAAGGTGGCTAAAGAGCTTGTTTGGGATAAAGAACAGTAAAAACAGCTTCAATCCCAGAGACGGGAAAGACAAGAAAAACTGCGACATTGAACATTCAGTGGGAGATTCAAGCATTTCCCCAGAAAAGGTTGCGTGGTTAAGATCGTGCTATAATGAAACAGAGAGGGAGCAGAACAAGCACGCCATTGCTGTGGCTGCCGCCACTGCTGCTGCGGCGGATGCAGCAGTAGCCGCCGCGCAGGCTGCAGTGGCGGTGGTGAGACTGACTAGTCATGGTAGAGGGACCATGTTTGGTGGTGTACATGAGAAGTGGGCTGCTGTCAAGATTCAAACAGTTTTTAGAGGTTATCTGGTAAGTAAGTGGAGTTTTTATTTCTTAATTTAT…	GhiIQD61	MGRASRWLKSLFGIKNSKNSFNPRDGKDKKNCDIEHSVGDSSISPEKVAWLRSCYNETEREQNKHAIAVAAATAAAADAAVAAAQAAVAVVRLTSHGRGTMFGGVHEKWAAVKIQTVFRGYLARKALRALKGLVKIQALVRGYLVRKQASATFHSMQALMRAQATIKSQKARAIINNDAIRFDIRARKSMERFDDTRSEHTVSIHSRRLSASLDIDESPKIVEVDTGIKPRARSRRTNTSISDFIDDHTYQTLPSPLPCRCPARLSIPDSRHYQDIDWGFSGDKCRFSTAHSTPRFINSCAPATPAKSVSGHNFFRPCGDSPNYMANTQSFKAKLRSHSAPKQRPEPVPKKRLSLNEMMESRSSLSGVKMQRSCSRAQEAIHFKNAVMGKLDRSLEFGK…	GhiIQD61	ATGGGGAGAGCTTCAAGGTGGCTAAAGAGCTTGTTTGGGATAAAGAACAGTAAAAACAGCTTCAATCCCAGAGACGGGAAAGACAAGAAAAACTGCGACATTGAACATTCAGTGGGAGATTCAAGCATTTCCCCAGAAAAGGTTGCGTGGTTAAGATCGTGCTATAATGAAACAGAGAGGGAGCAGAACAAGCACGCCATTGCTGTGGCTGCCGCCACTGCTGCTGCGGCGGATGCAGCAGTAGCCGCCGCGCAGGCTGCAGTGGCGGTGGTGAGACTGACTAGTCATGGTAGAGGGACCATGTTTGGTGGTGTACATGAGAAGTGGGCTGCTGTCAAGATTCAAACAGTTTTTAGAGGTTATCTGGCTCGAAAAGCATTACGAGCTTTGAAAGGATTG…
GH_D05G0787	GH_D05G0787.1	GhiIQD62	ATGGGTGTCTCAGGAAAATGGATCAAAGCACTAGTGGGCTTGAAGAAATCAGAAAAGTCTCAATCTTCAGAGAAAGTAGAAAATGTTAGTTTGAATGTTGCGGTTTTTTTTGGCTTCATGCTTGTGTCACAACCCACACACAATATCCAGGCCTGTGACATGTACATCATGGCATGTGTGCCTCTTCAAAATGCTGAAGTATTATCAAATGTCAGAAAGCATCTTCTATGCACACTTGTAGTTAGATGATCATGTTTTTGGAGTAATGCATTTTTCATTGACTTAGGGCTTAGTTGAGTTGTTGACTAATGTGGTACATACAAGGAGTATTATGTAGTAACTTACATGCAGTAGCTTTCCTTGTTAGCCTAATCAAATTGTGATTTCTACTCTCTTCAT…	GhiIQD62	MGVSGKWIKALVGLKKSEKSQSSEKVENRATGSKFRHRRKQLVEFDTNELQEELDENAASLAENATTRATIDAAGSPSDAFEVHDAPLNEHAREEWAATRIQTAFRGFLARRALRALKGLVRLQALVRGHAVRKQAAITLRCMQALVRVQARVRARRVRLALENQTAQQKLQQQLANEAHVKEIEEGWCDSIGSVEEIQAKLLKRQEAAAKRERAMAYALAHQWQAGSRQQSVPAGFEPDKSSWGWNWLERWMAVRPWENRFLDINLRDGVKIREDSPAEGKNGASSQIKPAMRKPAASSLHANLSNKKTGPSHFDGSDSPPGKLACVLEAVNAPSSKPKSKPNHEDSVEEADSRPVISSRSHSNPKERLTQSDKQAKRRLSMPNTGGGIVSQTTKLSK…	GhiIQD62	ATGGGTGTCTCAGGAAAATGGATCAAAGCACTAGTGGGCTTGAAGAAATCAGAAAAGTCTCAATCTTCAGAGAAAGTAGAAAATAGAGCAACTGGTAGCAAATTTCGTCACCGAAGAAAGCAGTTGGTTGAGTTTGATACTAATGAACTTCAAGAAGAGTTGGATGAGAATGCTGCTTCACTAGCTGAAAATGCTACTACTCGTGCAACTATAGATGCTGCTGGCTCTCCTTCTGATGCCTTTGAAGTGCATGATGCACCTCTTAATGAACATGCTAGGGAAGAATGGGCTGCCACGAGGATACAAACTGCTTTCCGAGGATTTCTGGCCAGAAGAGCACTGCGAGCATTAAAAGGATTGGTAAGACTGCAGGCCCTTGTCAGGGGTCATGCTGTAAGA…
GH_D05G1342	GH_D05G1342.1	GhiIQD63	ATGGGGAAAGCTGCAAGGTGGCTGAAGGGGTTATTGGGCATGAAAAAGGAGAAAGATAAAGACCGGATAGAGCAATATTCATCTGTTTTATCCGATCAGAAGGAGAGGAAAAGATTTAGTTTTGGCAAATCCAGCAAAGGTGTCAGTGAAATTTCTCAGAGTCCAAGCAATGTTTCCACCACTACAGATGCTGCTTGGCTCAGATCCTACATTGCTGAAACTGAGAAAGACCAAAACAAGCATGCAATTGCAGTGGCTGCTGCCACCGCAGCTGCAGCTGATGCCGCCGTGGCTGCAGCAAAGGCGGCAATGGCAGTGGTGAAGCTAACCAGTAATGGACGAACCAGTTTGGTTGGTGGAGGGAGGGAAAGGTGGGCAGCTGTGAAAATTCAAAGCGTC…	GhiIQD63	MGKAARWLKGLLGMKKEKDKDRIEQYSSVLSDQKERKRFSFGKSSKGVSEISQSPSNVSTTTDAAWLRSYIAETEKDQNKHAIAVAAATAAAADAAVAAAKAAMAVVKLTSNGRTSLVGGGRERWAAVKIQSVLRGYLSRKALRALKGLVRLQALVRGYLVRKRTIATLHSMQALLRAQTTVRSQRIRRSFNRDHSCCLENKPRSSIERFDEPRSVIHSKRLSASMETNAHDDSPKIVEIDTFKTRSRSRRFNLNALSECGDDFASHTTSSPLLCPVPARTSTPHHQNVDVFEWCFADDECRLSTAQSTPRFANPVRTPIAPATPLSVCGERYFRRPHSNLPNYMAKTQSFKAKLRSHSAPKQRPEPGAKKRLSLNGLMAARNSISGVRMNTSGYQVDE…	GhiIQD63	ATGGGGAAAGCTGCAAGGTGGCTGAAGGGGTTATTGGGCATGAAAAAGGAGAAAGATAAAGACCGGATAGAGCAATATTCATCTGTTTTATCCGATCAGAAGGAGAGGAAAAGATTTAGTTTTGGCAAATCCAGCAAAGGTGTCAGTGAAATTTCTCAGAGTCCAAGCAATGTTTCCACCACTACAGATGCTGCTTGGCTCAGATCCTACATTGCTGAAACTGAGAAAGACCAAAACAAGCATGCAATTGCAGTGGCTGCTGCCACCGCAGCTGCAGCTGATGCCGCCGTGGCTGCAGCAAAGGCGGCAATGGCAGTGGTGAAGCTAACCAGTAATGGACGAACCAGTTTGGTTGGTGGAGGGAGGGAAAGGTGGGCAGCTGTGAAAATTCAAAGCGTC…
GH_D05G1385	GH_D05G1385.1	GhiIQD64	ATGGGTGCCTCAGGAAAATGGTTTAGATCACTTGTAACTTTGAAACCACTTCATGAACCCATTAACCATGTATTTTTCTTCAATCCCATAACTAAGTTTCTAATTTTCTGGAACTCTTTTTTTTCCTTCGTGCTTTCAGTGTTTTTATTTTTCATAATTTTTTTTGTAGGAGAAAACGGGAGATAATAAGTCCAAGAAGAAGTGGAAACTATGGAGGAGCTCATCAGAAGGGTTCGGATCCTCCTCATCCAAGAGTTTCAAAATGCGGCACGTGGTAGCTGCCCCACTGGCCTCCGATTCTTCTTTCATGGCTGATGATCTGCTTGCTGCTGCCATGGCTACCATTGTTCGTGCTCAACCCAAAGATTTCAGAGCTGTGAAGCGTGAATGGGCCGCCAT…	GhiIQD64	MGASGKWFRSLVTLKPLHEPINHEKTGDNKSKKKWKLWRSSSEGFGSSSSKSFKMRHVVAAPLASDSSFMADDLLAAAMATIVRAQPKDFRAVKREWAAIRIQTAFRGLLARRALRALKAVVRIQAIFRGRLVRKQAAVTLRCMQALVRVQARVRAQCLPSSEEQSLHKLDDPTKEAEKGWCDIPGTLEEVKAKQQMRQQGAKKRERAMAYSVSRSYGNGSPNFRANKQQPLSRRHHQRLHRDSPDWDWLDRWMSTKPWETRTIEEPDSTVSRKSEDNIVSFHSTSSEQRGSLKLKTKNPKTSILTRPANQTSCSSSAPSSESVNDKSSTSTSSASVSPTTLSSNTIVVVTLNDSNHTQKPSYMNPTESIKAKQKTFKFSSSDNMRRHVVDDDDDDLQY…	GhiIQD64	ATGGGTGCCTCAGGAAAATGGTTTAGATCACTTGTAACTTTGAAACCACTTCATGAACCCATTAACCATGAGAAAACGGGAGATAATAAGTCCAAGAAGAAGTGGAAACTATGGAGGAGCTCATCAGAAGGGTTCGGATCCTCCTCATCCAAGAGTTTCAAAATGCGGCACGTGGTAGCTGCCCCACTGGCCTCCGATTCTTCTTTCATGGCTGATGATCTGCTTGCTGCTGCCATGGCTACCATTGTTCGTGCTCAACCCAAAGATTTCAGAGCTGTGAAGCGTGAATGGGCCGCCATTCGAATTCAGACTGCATTTCGCGGTTTGCTGGCAAGACGAGCTCTGAGGGCATTGAAAGCAGTAGTAAGGATTCAAGCCATATTCCGTGGTCGTCTAGTC…
GH_D05G1607	GH_D05G1607.1	GhiIQD65	ATGGGTTCTGGAAACTTGTTCAAGTCAATAATAAATATAGTGAAAGATGACAACTCAAAGAAAGTAAAGGTATATTCTCAAACAGTCATAAACTAAGCTATGCAAGTCTCTACATTCCAGTTATAAATAAACCTAAGATTGCTTCTCTAGTCATTGATTTGCAATTTGAATCCTTGGGTTAATATTATCTATGATCTCATCTGTTTGGCACAGGGGTCTTCTGCTTCTGAAAAATCCAGTGGCTTCAAATGGAAGAAACACCAGCAAAAGGCATCCACTAGACCAGGTCTAATTAGTGGAAATTCTAATACTCTTGGCATGCCAATTGAGGACTTGGCAGCTACTAGGATTCAAACTGCATTCAGGGCCTATAGAGTATGTTGGTTTGGAGGTTCTACA…	GhiIQD65	MGSGNLFKSIINIVKDDNSKKVKGSSASEKSSGFKWKKHQQKASTRPGLISGNSNTLGMPIEDLAATRIQTAFRAYRARKQLRRLKGIVRLQAQTLNSSIKKQATTTLNYLHSWSIIQAQIRARRLCMVTEGHLRQKKIANQIKLEAKLHDIEVEWSCGPETMEEILTKIHHREEAAVKRERTMAYAFSHQWRASNSDNNGIGNYELAKANWGWSWVERWIAVRPWESRLPAQSITPKKPLNRQINKASKNSSSPKPKPKPHFSNEKETMKMKPRRLSYPGAEKPTARQQSTKAEEENNKKGERVV	GhiIQD65	ATGGGTTCTGGAAACTTGTTCAAGTCAATAATAAATATAGTGAAAGATGACAACTCAAAGAAAGTAAAGGGGTCTTCTGCTTCTGAAAAATCCAGTGGCTTCAAATGGAAGAAACACCAGCAAAAGGCATCCACTAGACCAGGTCTAATTAGTGGAAATTCTAATACTCTTGGCATGCCAATTGAGGACTTGGCAGCTACTAGGATTCAAACTGCATTCAGGGCCTATAGAGCTCGAAAACAATTACGTCGATTGAAAGGTATTGTAAGATTGCAGGCTCAAACCCTAAATAGTTCCATCAAAAAGCAAGCTACAACAACATTAAATTATCTTCACTCGTGGAGCATCATACAGGCTCAAATAAGAGCTCGTCGACTCTGTATGGTAACAGAAGGCCAT…
GH_D05G1915	GH_D05G1915.1	GhiIQD66	ATGGGAAAATCCACTTCCTGTTTCAAAATCATCACTTGCGGCGGCGATTTTGCTGAGAACAACGACGTTATTCATGTTCCTGAGCCTGAGGTATATATATAAATATCCTTTTCGCCTTTACGGCTGCCGTTATTTTTTTCGTTGTTGTTTTGCGTTGGATTAGGATTTCACCTTCCGACTTTGCATTTGAGGTTTCAGTTCGAAACAGTCAGTGCATTGTTTAATTTATGGATTTACTTGAGGAACCGGAGTTTAAACTTGCCTTACTCCACTACTTTAAGATCTGACTACTCTTGGCTTCGCATTTTTATCAGCAATGTCCAAGCTGCCTTTTAAATCCAATTACTTTCACAACTTATATAATGCAAATGTTTTTTAGTTTCTGGTTTCAAATATAGC…	GhiIQD66	MGKSTSCFKIITCGGDFAENNDVIHVPEPEIKKSNDKKGWSFRKRSERHRVLSNTVIQEATSGLKESPESSGFNFQQPDASIIPEETSTIEYSEEKPQALTPKEHIEEESKCVASKGYTEEKSQLLIPEDSKVPEPVATATNEAEDDANLGESVVVIIQTAIRGFLAHKELGKLKNLVKLQAAVRGHLVRRRALGTLRCIQAIVKMQVLVRARLSQEGPYDEKKRDGKHCGENQSLERSAIKQNATYTSIENLLSNRFARKLMDSTQKTKPIRIKCDPSKPNSAWSWLERWMSVSLSKRPSTTELSIEQPEREKSDNCDFQVTTTVPESFPESNEPKLYVRETLVSSESEENLIAHDAANSKFEACQTTSSTVMDDLEQPQIDNSTSDIKEGEENLITY…	GhiIQD66	ATGGGAAAATCCACTTCCTGTTTCAAAATCATCACTTGCGGCGGCGATTTTGCTGAGAACAACGACGTTATTCATGTTCCTGAGCCTGAGATTAAGAAATCAAATGACAAAAAGGGATGGAGTTTTAGAAAGAGATCTGAACGGCATCGGGTGCTTAGCAACACTGTTATACAAGAAGCTACTTCTGGACTTAAGGAAAGTCCGGAATCTTCCGGTTTTAATTTTCAACAGCCTGATGCATCCATTATTCCTGAGGAAACCTCCACCATTGAATACAGTGAAGAGAAACCTCAGGCGCTGACACCAAAGGAGCACATTGAAGAAGAATCTAAGTGTGTGGCATCAAAAGGATACACTGAAGAAAAATCTCAGTTGTTGATTCCGGAGGACTCAAAAGTT…
GH_D05G3028	GH_D05G3028.1	GhiIQD67	ATGGGCAAAAAAAGAGATTGGTTTTGGTTTGTGAAGAAAGCTTTGACCCCTGAGTCCAAGAAAGATCAGGTAAAAGGTTTGCACAATTTAAGATTTTTTATAATTAAAAAAAAAGTTATTTATGAAAATGAATCGTTTTGAATAATATAATATCATATAATTGATTTATTAGACAATATAACCTATAAAAATTAATATTTTAGTTTAAAAAGGGGTGATGCCAAAATGTCAATGCAACATCCTTTTTCACTCAACTTTTACTCTTTTTAAAAATTTTATATAGTTTAGTTTTATAATTTTATAGTTATGGGTGTGGTATAATTTTGAATTTCATATATCTATTTTAAGAAAACTAGAAGTTAATTCATTTATTTTAATTTCTCATATTTTGATCTTTGC…	GhiIQD67	MGKKRDWFWFVKKALTPESKKDQKESSKSKKKWQSKTKDSEPAVPLPQETETETKTEEPEPPPPEDAKPAEAENKPKRHTHFIALATAMAAAAAVAASKATAEAVRVASLQRISSERTAATKIQTAFRGYLARRALPELRRSERLKSMIEGQSVKEQAKTALRCMQTMGGVQSRIRGMRLRMLEENQILHHHLQQKRHKELDKFNASMGGEWHDGRKSKEQSEAIKQYKQEAAMRRERALAYAFTRQRSWKVSSKAANQTLMDQNTPHWGWSWLERWMAARPWDIPCSSPNSASVNTLVSSSISNNDNKPSPTPSKPTPPPPSKIPSFSSLSSQIRQPSPRGTPPGGVECSTPDRDRRRQSSIGGFSSAKDDKSVGSSAEKAPSWMKQVRASQLSRSLK…	GhiIQD67	ATGGGCAAAAAAAGAGATTGGTTTTGGTTTGTGAAGAAAGCTTTGACCCCTGAGTCCAAGAAAGATCAGAAGGAAAGTTCAAAATCAAAGAAAAAATGGCAAAGCAAAACCAAGGATTCGGAGCCTGCAGTTCCTTTGCCTCAAGAAACTGAAACGGAAACAAAAACTGAAGAGCCTGAACCTCCTCCCCCTGAAGATGCCAAACCAGCGGAAGCTGAAAATAAGCCTAAAAGACACACCCACTTCATCGCTCTTGCCACCGCTATGGCTGCTGCCGCCGCGGTCGCAGCTTCTAAGGCGACTGCTGAGGCTGTTCGCGTCGCTTCTTTACAACGCATATCGTCGGAGAGAACGGCTGCTACCAAGATTCAAACTGCATTTCGCGGATACTTGGCTCGG…
GH_D06G0037	GH_D06G0037.1	GhiIQD68	ATGGGAAGATCCATTTCCTGTTTCAAAATCATCACTTGCGGCACTGATTCAGCTGATAAAAACGACGACGTTATCGATGTTCCTCAGGTATATGTGTTATCCTTTTAGCCTTTACGGCGGCTGTTCGTTGGATTTAAGATTTCATGTTTTTTTTTTTGTAATTGATGTTTTTAGTTGCTTTAATTGAAGTTTTCAGAGGAATCGAAGCTTTAGAACTTGACATCTTTCATTATTTTGAGATCCGATTGCTTCCACAGTTTATGAATTGAATTTGTTTATTTTCAGCTTCAGTTTCCAAATCTAGCAAGTTTTTTAAGGTCAAATTGTATAGAATGTCTCTGTACCATGTGGTTTTTATGGATTTAGTCCCTATAATATAATTTGATCATTTCTCGGCTA…	GhiIQD68	MGRSISCFKIITCGTDSADKNDDVIDVPQDKRSSDKKGWSFRKRSERHRVLSNTVVQEASTGLEESPETASYVQQSDVSVAPEKTSTVQYTEEKLQSVAPKDYVEEKSQLLTQEDLKVPEPVVAATNEAKDDSNVDESVVVVVQTAIRGFLARKELGKLKNLVKLQAALRGHLVRRHAVGTLRCIQAIVKMQMLVRARHARLSQEGSYSEKNAASTSIEKLLSNRFARQLLDSMPKTKPIRINCDPSKPSPGWSWLERWMSTSSSEKTSMAELPNEQPRDSPLDATVPSKAISESNDVNKILVSSESEENLITYVAADSKSKACLPTSSVTGDLERTQIDNMSTSDLKETSLDQTIETEAHCLDVGVESLDAVLSGADTISRSKEPSITENPVLHDRKG…	GhiIQD68	ATGGGAAGATCCATTTCCTGTTTCAAAATCATCACTTGCGGCACTGATTCAGCTGATAAAAACGACGACGTTATCGATGTTCCTCAGGACAAGAGATCGAGTGACAAAAAGGGATGGAGTTTCCGGAAGAGATCTGAACGGCATCGGGTGCTTAGCAACACTGTGGTACAAGAAGCTTCTACTGGACTGGAGGAAAGTCCTGAAACTGCTAGTTATGTTCAACAGTCTGATGTCTCCGTTGCTCCTGAGAAAACCTCCACCGTTCAGTACACCGAAGAGAAACTTCAGTCAGTGGCACCAAAAGATTACGTTGAAGAAAAATCTCAATTATTGACCCAAGAGGACTTGAAAGTGCCCGAACCTGTTGTTGCTGCCACGAATGAGGCTAAAGATGATTCT…
GH_D06G1866	GH_D06G1866.1	GhiIQD69	ATGGCTAAGAAAAAGAGCTGGTTCAATCTAGTGAAGAAGTTTTTTCTCTTTGAGACAATTGCAAGAACAGAGAAGGTAACTTTTTTTTTTTGCTATTTACTGCTGTTTCCCAGTTCTTATTTTTATTTTTGCTTTATCCTTTATGAATGGATGTTATCTATTTGTCAGAAGGAGAAAAAAAGGAAATGGATGTTTGGAAGGTTAAGGACCAAGAGGTTGACAGCACCACCAAACGACGTGACAAAGGATGAGCATGTAACTGTGGCTATTGCCACACCTGCTGCCGCCGAAGCAGGTGTTGCAGCCGCTCAGGTTGCGGCCGAGGCTGTTCCACCCTATGGTACCCTTCATTCTAACCATATATGTGATGGAGAAACAGATGAACGAGCCCTGGATGTT…	GhiIQD69	MAKKKSWFNLVKKFFLFETIARTEKKEKKRKWMFGRLRTKRLTAPPNDVTKDEHVTVAIATPAAAEAGVAAAQVAAEAVPPYGTLHSNHICDGETDERALDVQELAATKIQATFRGYLARKALRALKGIVRLQAIIRGSAVRRQAMNTLKCLQSIVNIQSQVSAMRFQTAEGTWQYDETKQLVTLEDKIIKVDINSQRRWDDSILTKEEAEAMVLSRKEAAIKRERIKEYSYVHRKSAESELNKGNGRLKYWLDEWVDTQVTKSKELEDLDSVWTSNRKPMEENRAKHLRLKTSPRPYHYNSEGLESPVVPVPRRSFHKKQCSLGEDNSFPTSPVVPPYMAATQSARAKVRSLSSPKVRPGSFETQSESYSPYKNKLCLISSITSEVPSSYKMNGSRSS…	GhiIQD69	ATGGCTAAGAAAAAGAGCTGGTTCAATCTAGTGAAGAAGTTTTTTCTCTTTGAGACAATTGCAAGAACAGAGAAGAAGGAGAAAAAAAGGAAATGGATGTTTGGAAGGTTAAGGACCAAGAGGTTGACAGCACCACCAAACGACGTGACAAAGGATGAGCATGTAACTGTGGCTATTGCCACACCTGCTGCCGCCGAAGCAGGTGTTGCAGCCGCTCAGGTTGCGGCCGAGGCTGTTCCACCCTATGGTACCCTTCATTCTAACCATATATGTGATGGAGAAACAGATGAACGAGCCCTGGATGTTCAAGAACTTGCTGCCACAAAAATCCAAGCTACCTTTCGGGGATACCTGGCAAGGAAAGCTTTGCGGGCGCTGAAGGGGATAGTGAGGCTTCAA…
GH_D06G1971	GH_D06G1971.1	GhiIQD70	ATGGGCAAAAAAGGAAGCTGGTTTACTGCTGTGAAGAAAGTTCTAAGCCTTGAACCCAACAAAGAAGAGGTTTCATTTTCAATTATTTTATTTCATAATCTAATTGTTTTTTATTTAATTTTTTGTATTTTTTTTATTTCACCAGAAGATTCAAAAATCCAAGAAAAATGGGGTTAAATTACCTGAGAAGATCAAAGGAAGCAAACGTGACAACTGGTTCGCTCCGGCCACCACCATGGTGACCGGCGCGTTGGTTCGCCTTACTTTGTCGCCACACTACTTGGGAAAATCAATGGAGGAAATAGCTACTGTTAAGATTCAAACTGTGTTTCGAGGATACCTGGTATCAAATTTCTTCCCCCATTTCTTTAATTTGAAATTTCTTATATTAAGTAATTT…	GhiIQD70	MGKKGSWFTAVKKVLSLEPNKEEKIQKSKKNGVKLPEKIKGSKRDNWFAPATTMVTGALVRLTLSPHYLGKSMEEIATVKIQTVFRGYLARKALRDLRGLERLKSLIQGQSVKRQATITLRCMRTLARVQSQTRTRQLRVSEQNRALQKHLQTKYEKQLQNSKSYMGEDWNVSTKSKEQMQAKQQYRQVAAMRRERALAYSFTHQRSWKVTCRSMNHTSMDPFNPKWSWSWLERWMSTRPWEIQNAPDNNDHGPSKSVGAEITKAKSQSDVNNDHNKQSSTPAKPIRPPNRRSSSTPPSKTHSISSKKGLESPSPTRIQLPDCYKRHSIGGLSLERDDEVFANSPPNNKIPARSSSKDRSRPPSINRNPVNTRRHSGPPKVDIFSN	GhiIQD70	ATGGGCAAAAAAGGAAGCTGGTTTACTGCTGTGAAGAAAGTTCTAAGCCTTGAACCCAACAAAGAAGAGAAGATTCAAAAATCCAAGAAAAATGGGGTTAAATTACCTGAGAAGATCAAAGGAAGCAAACGTGACAACTGGTTCGCTCCGGCCACCACCATGGTGACCGGCGCGTTGGTTCGCCTTACTTTGTCGCCACACTACTTGGGAAAATCAATGGAGGAAATAGCTACTGTTAAGATTCAAACTGTGTTTCGAGGATACCTGGCGAGGAAGGCATTGCGAGATTTGAGAGGGTTAGAGAGGTTGAAATCATTGATACAAGGGCAATCCGTGAAACGACAAGCCACTATTACGTTACGATGCATGCGGACACTTGCTCGAGTGCAGTCCCAAACT…
GH_D07G0100	GH_D07G0100.1	GhiIQD71	ATGGGAAAAGCTACAAGGTGGCTAAAGAGCTTATTTGGGATAAAGAACACCAAAGAATGCCCAAGTTCCGGTGACCGGAAAGATAAGAAACGGTGTAGCATTGGGCATTCAGGGCGGGAATCAAGCGGCGGATTATGTCACAACCCTACAACGATACCACCAAATATATCACCGGCAGAGGTGGTTTGGCTGAGATCATTCTACAATGAAACGGAGAAAGAGCAGAATAAGCACGCAATTGCGGTGGCAGCTGCCACGGCTGCTGCTGCAGATGCCGCTGTCGCCGCCGCTCAGGCAGCTGTGGCGGTGGTGAGGCTTACGAGTCATGGAAGAGGTACCATGTTCGGCGGTGGTGGACATGGAAAGTGGGCTGCCATTAAGATTCAATCCGTTTTCAGA…	GhiIQD71	MGKATRWLKSLFGIKNTKECPSSGDRKDKKRCSIGHSGRESSGGLCHNPTTIPPNISPAEVVWLRSFYNETEKEQNKHAIAVAAATAAAADAAVAAAQAAVAVVRLTSHGRGTMFGGGGHGKWAAIKIQSVFRGYLAKKALRALKGLVKIQALVRGYLVRKQASATLHGMQALIRAQATIRSQKARKSMEKFDDTRSERTVSFHSTRLSASLDTLNIEESPKIVEIDTGRPKSRSRRTNTSVSDFGDDPSFQILSSSVPARLPARLSVPDSHTDWGLTGDECRFSTAQSTPRFINCCVSNAPVTPAKSVCADNFFRHYGIGNLNFPNYMANTQSFKAKLRSHSAPKQRPEPGPKKQLPLVETTESRSSLSGVRMQRSCSQAQEAISFKNVVMGKLDRYS…	GhiIQD71	ATGGGAAAAGCTACAAGGTGGCTAAAGAGCTTATTTGGGATAAAGAACACCAAAGAATGCCCAAGTTCCGGTGACCGGAAAGATAAGAAACGGTGTAGCATTGGGCATTCAGGGCGGGAATCAAGCGGCGGATTATGTCACAACCCTACAACGATACCACCAAATATATCACCGGCAGAGGTGGTTTGGCTGAGATCATTCTACAATGAAACGGAGAAAGAGCAGAATAAGCACGCAATTGCGGTGGCAGCTGCCACGGCTGCTGCTGCAGATGCCGCTGTCGCCGCCGCTCAGGCAGCTGTGGCGGTGGTGAGGCTTACGAGTCATGGAAGAGGTACCATGTTCGGCGGTGGTGGACATGGAAAGTGGGCTGCCATTAAGATTCAATCCGTTTTCAGA…
GH_D07G0234	GH_D07G0234.1	GhiIQD72	ATGGGTGCTTCAGCGAAATGGGTGAAATCTCTTATTGGTCTCAAGAAAACTGTAAAAGATGACAAAGTAAGCTCTACTCTTTTTTGTGGTTCATCTCAAAGTTACCTTACTGTTATATAGAATTAATCACCAAAGTGTTTTTTTTTTGTAGGAAAAGATGAGTGGCAAGAGCAAGAAATGGAAGCTATGGAGGAGTTCTTCAGGGGATGGAATAGGTTCCTCATGGAAGGGTTTTAAAGGAAAGTTTAAAGCAGATTACGAAGGATCTGATTCTTCACCAAGGTCTGAAGCTTTCTCTGCTGCCATGGCTGCTGTGGTTCGAGCTCCTCCTAAAGATTTCAGGGTTGTAAGGCAAGAATGGGCTGCTATCCGCATTCAAACTGCTTTCCGAGGCTTCTT…	GhiIQD72	MGASAKWVKSLIGLKKTVKDDKEKMSGKSKKWKLWRSSSGDGIGSSWKGFKGKFKADYEGSDSSPRSEAFSAAMAAVVRAPPKDFRVVRQEWAAIRIQTAFRGFLARRALRALKGIVRIQAFVRGRQVRKQAAVTLRCMQALVRVQARVRARRVRMSIEGQAVQKILDEHRSKAELLKQAEEGWCDSKGTLDDVKIKLQLRQEGAFKRERALAYSLAQKQWRLNMDSNTRTNSSVSVPYLKNQVFDKNSWGWSWLERWMAARPWETRLMEQSQADPSEPTPPSKTCSESRKTTRPTEPCSVKVRKNNVTTRISAKPPHIGQGTRSSSSPSSEFRFEESSASSSICTSTTPVSWNTIPTSERMEKTGNSRPNYMNLTESTKAKQRAANHALRRIQMQSMD…	GhiIQD72	ATGGGTGCTTCAGCGAAATGGGTGAAATCTCTTATTGGTCTCAAGAAAACTGTAAAAGATGACAAAGAAAAGATGAGTGGCAAGAGCAAGAAATGGAAGCTATGGAGGAGTTCTTCAGGGGATGGAATAGGTTCCTCATGGAAGGGTTTTAAAGGAAAGTTTAAAGCAGATTACGAAGGATCTGATTCTTCACCAAGGTCTGAAGCTTTCTCTGCTGCCATGGCTGCTGTGGTTCGAGCTCCTCCTAAAGATTTCAGGGTTGTAAGGCAAGAATGGGCTGCTATCCGCATTCAAACTGCTTTCCGAGGCTTCTTGGCAAGAAGGGCTTTAAGGGCTTTAAAGGGAATCGTGAGGATCCAAGCCTTTGTTCGCGGTCGACAGGTGAGGAAACAGGCTGCT…
GH_D07G0707	GH_D07G0707.1	GhiIQD73	ATGGGAAAATCTCCCGGAAAATGGATTAAGACTGTGCTTTTTGGAAAGAAACCTTCCAAATCTAGTTATCCTAAAGGAAGGGAGGTAATATTTTACTGCAAATTACTACTAAACAGCAAATATAATGTTATTTATATTTGCAAGCAGTGGCAAATTCTTGTTTGCATTGCTGTTACTTAGAGTTTCCTATAAGCTAGATGGGGGACAGATCCGTAGTCGGTGCTGTTGCCACCATTGAGATCTTAATGGCCCTAGGAGAGTTGGAGTATATTTAATAAATAGCTAGATTTTACGTATACCCCACTGAAATTGAAAAGAAAAATGATATGCATATTACATGTTTATAAATGTTGATTGATTTGCTTTGCAAAATAATAAGGTCTAATTAGAAATCCTATC…	GhiIQD73	MGKSPGKWIKTVLFGKKPSKSSYPKGREKVANDSQVLVAARASESDLAVAPPFSSQLNPHTTERDERRLELENKETANISHDDETSLPMSQDIDSQKFTLQDSPSNPERIKQEQSATLVQAAFRGYLARRAFWALKGIIRLQALIRGHLVTRQAISTLCCMMGIVKLQARVRGHLVRHSDCVHELQKKCNQINLLESKLVVSLGFNMPSHIGKLSAHAFVRKLIASSPTVMPLRLRYDVGEPNSVWIWLERWSASCFWKPVPQPKKTSNTKFEKKRVNGQTVEMDTGRAKRSVRRIPPANMDTSVQATSEFDKPKCNPRKISGHPAEPVQENPQNELEKVKRNLRKVHNPVVEHSLQSEFEFEKLKSLEKVSSTPDLDMVEESLNRSAEKTSKEAAMTA…	GhiIQD73	ATGGGAAAATCTCCCGGAAAATGGATTAAGACTGTGCTTTTTGGAAAGAAACCTTCCAAATCTAGTTATCCTAAAGGAAGGGAGAAGGTTGCCAATGACAGCCAGGTATTGGTTGCAGCCAGGGCATCAGAAAGTGATTTGGCTGTGGCTCCTCCCTTCTCTTCACAGCTCAATCCTCATACTACTGAGAGAGATGAAAGGAGATTAGAATTGGAGAACAAGGAAACTGCAAATATCTCACATGATGATGAGACATCACTGCCAATGAGTCAAGACATAGATTCTCAGAAGTTCACTCTTCAGGATTCACCTTCTAATCCTGAAAGGATAAAGCAAGAACAATCGGCGACCCTGGTGCAGGCTGCTTTTAGGGGTTACCTGGCTCGCCGAGCGTTCTGG…
GH_D08G1102	GH_D08G1102.1	GhiIQD74	ATGGGAAAGAAAGGGAGTGGATGGTTCTCCACGGTGAAGAAAGTGTTCAAGTCTTCATCTAAGGACTTGCCCGAGAAAAAGGTAACTGATTTTTTTTGTTGTTGGGTTTTGGATTTCTTTGCTTAATTTCTAGGCAACCGATCAAAGGTTTTTATGTTGACATCTTTCAAGATTTTCTTTTTCAGATTTTCATTTTAAGGCAGACTTAAAATAAAATACAATAAACCCAAAATCCAAAACATTCTGGATTATGTTTCTTTTAGTTAGGGGTGCTTACCCTTTTCCTATCTGAACATGGTTAGCTCTTATCTGGGTATCTTACATGCCCATTATTCATAAGTCATCTGTTACAAAACTAGATTTATCGAACTTTTCCTACATGTTTAAAATATCATATTC…	GhiIQD74	MGKKGSGWFSTVKKVFKSSSKDLPEKKNESVEKWPNEGPEVVSFEHFPAESSPDITKDESETSTPNKDSDHAIAVALATAAAAEAAVAAAQAAAKVVRLAGYGRHSMEERAATLIQSYYRGYLARRALRALKGLVRLQALVRGYNVRKQAQNTMRCMQALVRVQASVRARRLQLTQEKLQKRVDDDEDDNEEEKRGMEELKLERKPKSPLNKYDSWDGENVNGCASKKHDAVMRRERALAYAYSYQEEQRQHHEQLLVQPQHNGKDVGVYLNEREKAQWGWNWLECWMSPQPYPARQLGLQEGAYLALPRATTTTDNMLEKTVEMDVVTPIKSSSYLTQQQLQSDSSSVTSYMVTTQSVKAKGRSQGSAKQQRGAYVPEWNSSTKKASGCDSSSSGGGP…	GhiIQD74	ATGGGAAAGAAAGGGAGTGGATGGTTCTCCACGGTGAAGAAAGTGTTCAAGTCTTCATCTAAGGACTTGCCCGAGAAAAAGAACGAGAGTGTTGAGAAATGGCCGAATGAGGGCCCGGAAGTAGTGTCATTTGAACATTTTCCGGCAGAGAGTTCACCAGACATCACTAAAGATGAGAGTGAAACGTCAACTCCGAACAAAGATAGTGACCACGCCATTGCTGTGGCCTTGGCAACCGCTGCTGCTGCAGAAGCTGCTGTTGCTGCTGCTCAAGCAGCGGCTAAAGTTGTTCGATTGGCTGGTTATGGACGCCACTCTATGGAAGAAAGAGCTGCAACTCTTATACAGTCGTATTACAGAGGCTACCTGGCTCGGAGAGCTTTGCGAGCTTTGAAGGGA…
GH_D08G1176	GH_D08G1176.1	GhiIQD75	ATGGGCCTTTTCCGGCGACTCTTTGGCGCCAAGAAGCCTGCCCAACAACGCCCCGACAAAGACAGGAGGCGTTGGAGCTTTACCAGATCTTCCCATCCCACGTCTTCGACTTCTCATCTTGATGCCCTTTCTGGTCCATGCAATGGCACATTGGATGCCAACAAGCGCGCCATAGCAGTAGCAGCCGCCACTGCTGCTGTAGCTGAGGCTGCTCTGGCTGCAGCGCATGCGGCGGCTGAGGTTGTTAGGCTGACAAGTGGTGGTGTTGGCAGCGCCGATGGGAGCAACCGACGCCTCCCACAAGAACTAGCGGCTGTTAAGATACAGTCCGCTTTTCGAGGTTATCTGGTTAGTATTTTCTTCTGTTCTAAATTTTATTTTATTCTTGCTTGAACTTTT…	GhiIQD75	MGLFRRLFGAKKPAQQRPDKDRRRWSFTRSSHPTSSTSHLDALSGPCNGTLDANKRAIAVAAATAAVAEAALAAAHAAAEVVRLTSGGVGSADGSNRRLPQELAAVKIQSAFRGYLARRALRALKALVKLQALVRGHVVRKQTADMLRRMQTLVRLQARARASRSYMTKSFYSTCKISHSRHAVHAHSLKDECQLHVCSTKYDGSSILKRCGSNSNLMDTINLEKARMGSNWLDNWMEESLRNNHRDSPLIHRHADDAKSDKILEVDTWKPNLNCPPCNRNFRTSQHGSAFDYNQSYMAYGSPRKQSGKGSNQIPDNFSAEVLPLSSLKHPGRKDKAILRTADIDNNPQVLSASSSRPGSSARRSPFAKRECSWGYLSGFSGHPNYMANTESFRAKYRS…	GhiIQD75	ATGGGCCTTTTCCGGCGACTCTTTGGCGCCAAGAAGCCTGCCCAACAACGCCCCGACAAAGACAGGAGGCGTTGGAGCTTTACCAGATCTTCCCATCCCACGTCTTCGACTTCTCATCTTGATGCCCTTTCTGGTCCATGCAATGGCACATTGGATGCCAACAAGCGCGCCATAGCAGTAGCAGCCGCCACTGCTGCTGTAGCTGAGGCTGCTCTGGCTGCAGCGCATGCGGCGGCTGAGGTTGTTAGGCTGACAAGTGGTGGTGTTGGCAGCGCCGATGGGAGCAACCGACGCCTCCCACAAGAACTAGCGGCTGTTAAGATACAGTCCGCTTTTCGAGGTTATCTGGCACGGAGGGCACTGAGGGCATTGAAAGCATTGGTGAAGCTTCAAGCACTG…
GH_D08G1206	GH_D08G1206.1	GhiIQD76	ATGGGGAAGATTGGAGGAAACTCTTGCTTGACTGCAGTCAAGAAAGCCTTTAGGTCTCCTACTAAGGAAAACGATAAGAGGAGCTGTAGAAGGAGAGACGATGGTGAACAAGAGGAAGAAGAGAAGGTTATTATTTTCTCTTCAACTTATCCTTTTTCTCTTGAATGTTTTTGTTTGTGCATGTGATTAACTTTAAATCAATGTTCTTTTTCTTGGTTTGCGCAGAAAAGAGGGAAACGAAGATGGATTTTCAAGAAGCCTCCGTATCAGGAAACAGTGATACAACACAGTGAAGCAAGCACCATAGTTACAATAGCCAATGCTAAAGTTGCCACTAATTCAGAAACCTCAGCACTGAATACCGTTCCCGAAGCTGAGCAAAGATCACATGCCATTGCG…	GhiIQD76	MGKIGGNSCLTAVKKAFRSPTKENDKRSCRRRDDGEQEEEEKKRGKRRWIFKKPPYQETVIQHSEASTIVTIANAKVATNSETSALNTVPEAEQRSHAIAVAIATTAAAQAAVATAQAAVEVVRLTRPSVFLREHIAAIVIQTAFRGYLAKRALRALKGLVKLQALVRGHNVRKRANITLRCMEAMARVQARVRDQRKRLSVHERSMDSIFSDHRTNTLWSSYLADRKSIYSREESNYDDDWGTHWDEHPKTLKEIQAILQKTKQATMKREKALAQAFSNQIWTGDRNTVESEDEVDGKTRWVDRWTTRKQWESTGRMSSDHIDSIKTVEIDTSRPYSYSAPHSQNPNSQYHYQQRRPSSFSVASPLHKTINGLPIRSITPSPSKAKPLQIYSASPRYL…	GhiIQD76	ATGGGGAAGATTGGAGGAAACTCTTGCTTGACTGCAGTCAAGAAAGCCTTTAGGTCTCCTACTAAGGAAAACGATAAGAGGAGCTGTAGAAGGAGAGACGATGGTGAACAAGAGGAAGAAGAGAAGAAAAGAGGGAAACGAAGATGGATTTTCAAGAAGCCTCCGTATCAGGAAACAGTGATACAACACAGTGAAGCAAGCACCATAGTTACAATAGCCAATGCTAAAGTTGCCACTAATTCAGAAACCTCAGCACTGAATACCGTTCCCGAAGCTGAGCAAAGATCACATGCCATTGCGGTGGCTATTGCTACCACAGCAGCTGCTCAAGCAGCAGTAGCAACCGCTCAAGCTGCTGTAGAAGTTGTTCGGCTCACCAGGCCTTCCGTTTTCTTGAGA…
GH_D08G2064	GH_D08G2064.1	GhiIQD77	ATGGACAAAGCCTCCAAGTGGTTCCGCAGTATCCTCGGTCTCAAAAGAAGAGACTCCCACAAACAACCACCTTCTTCCAAACGTCGTTGGTGTTAGTACAAAACTCCGGTAAGGAAAAAACTCGAACACACGATCGGAAATCGAAAAGAAAAAGAAGAAATAGGACAGGCTCCAAGGCGTGTATCAAGCCACTATCTTTAAGGTTATATTCGCCCCCACTTATCTTCAGTGTGCAAACGAGTTCCAAGCAAATTAACCTCGAGGATACAATGAAGCCAATGACTATTTGCGTTTTGCACTGACGAGAATAGTCCACTATGCACTGAGTAATGTATAACAAAAACTCAATTTCTACAAAGGATTTCTGCAGCAATACTTTATAGAATAATCTAATAATAT…	GhiIQD77	MDKASKWFRSILGLKRRDSHKQPPSSKRRCWSFVKSYREKDSSAVSTATSSLRGLQQPLEDSVSVIDANIGYDAVDDNNDHAIARFRTVPLPLYNGRYSDIVPLFESLIAVAAATAAVAEAAVAAAQAAAVVVKLTGSNGRCARDPVAHISNSYGAGEELAAVKIQSTFRGYLARRALRALKGLVKLQALVRGHIERKKTTEWLRRMQAFLQTEARARAGQTQISESSRISSKSSHYLHPGPPTSENFEHAVQLKSTKSEQSSMLKRNGSRLSGRTCDNYEQIHPGWYTSDHWIDVRSWDQRGHSTRIGHMVDEKNDKILEVDIGKPRFTSKLRNLFRSTHLALNSDLYSCSFTNSRDSHQTAPTPLFEAQSLNPLKFPHEVEESLFCTVDNSPNFHSA…	GhiIQD77	ATGGACAAAGCCTCCAAGTGGTTCCGCAGTATCCTCGGTCTCAAAAGAAGAGACTCCCACAAACAACCACCTTCTTCCAAACGTCGTTGTTGGAGTTTCGTTAAATCCTACCGCGAGAAGGACTCCTCCGCCGTCTCTACTGCCACGTCGTCGCTTCGCGGTCTTCAGCAACCACTCGAAGATTCTGTTTCTGTTATTGACGCGAATATTGGGTATGATGCAGTGGATGATAATAATGACCACGCCATTGCTCGGTTTCGGACGGTGCCGCTACCGCTATATAACGGCCGCTATTCTGATATCGTCCCGCTATTTGAATCCCTGATTGCTGTGGCTGCCGCCACTGCCGCGGTTGCCGAAGCAGCCGTTGCGGCTGCTCAAGCTGCCGCTGTGGTGGTT…
GH_D08G2761	GH_D08G2761.1	GhiIQD78	ATGGGAAAAGCTACGAGGTGGTTGAAGAGCTTATTTGGGATAAAGAACAGCAAAGACTACTTGAATTCCGGTGACCGGAAAGGCAAAAAAGGGTCTAGAATTGCCCGTTCGGGGAGGGATCCCAGCGGCGGATTGTGTCACAGCGTTACAGCGACACCACCACCAAACATGTCACCGGCAGAAGTGTCTATGTGGATAAGGTCATACTACAATGAAACGGAGAAGGAACAAAACAAACACGCAATCGCCGTAGCGGCAGCCACGGCAGCGGCTGCCGATGCTGCGGTGGCCGCTGCGAAAGCAGCCGTGGCGGTCGTGAGGCTGACAAGTCACGGAAGGGGAACCATGTCCGGGCACGAGAGATGGGCTGCTGTTAAAATTCAAACCGCGTTTCGAGGT…	GhiIQD78	MGKATRWLKSLFGIKNSKDYLNSGDRKGKKGSRIARSGRDPSGGLCHSVTATPPPNMSPAEVSMWIRSYYNETEKEQNKHAIAVAAATAAAADAAVAAAKAAVAVVRLTSHGRGTMSGHERWAAVKIQTAFRGYLARKALRALKGLVKIQALVRGYLVRKQATIRSHKANRFDIRARKSMERLYSFNHTTNGIDENSKIVEVVDIDRPKSRSRRNVNASKSDFGDEYQPVHRTLSSPFLSRVPARISIPDGRDWGLTGDEYRFCTAQNTPRVISSCGSNSNVSVAPPPRSVCSDNWFRHYGNYPNYMANTQSFKAKLRSQSAPKQRPELGPKKRLSLDEMVESRCSLSGVRMQRWCSQV	GhiIQD78	ATGGGAAAAGCTACGAGGTGGTTGAAGAGCTTATTTGGGATAAAGAACAGCAAAGACTACTTGAATTCCGGTGACCGGAAAGGCAAAAAAGGGTCTAGAATTGCCCGTTCGGGGAGGGATCCCAGCGGCGGATTGTGTCACAGCGTTACAGCGACACCACCACCAAACATGTCACCGGCAGAAGTGTCTATGTGGATAAGGTCATACTACAATGAAACGGAGAAGGAACAAAACAAACACGCAATCGCCGTAGCGGCAGCCACGGCAGCGGCTGCCGATGCTGCGGTGGCCGCTGCGAAAGCAGCCGTGGCGGTCGTGAGGCTGACAAGTCACGGAAGGGGAACCATGTCCGGGCACGAGAGATGGGCTGCTGTTAAAATTCAAACCGCGTTTCGAGGT…
GH_D08G2809	GH_D08G2809.1	GhiIQD79	ATGGGTGCTTCAGGGAAATGGGTAATATCTCTTATTGGTCTCAAAATAACCCAAAAACAACACCAAGTAAGCTCTGGGTTTTCTATGTTATTCCACCGTAAAAATATTTATTTACATTTTAAAGATTTAAAGCTCTTTCCTTTTTGTGTGTTTATGTAGGAGAAAGTGAATAACAACAAGAAATGGAAGCTATGGAGAAAGTTTAGATCAGATTCTCAAAGCTCTGATTCTTTCATTGCTGCCATGGCCGCCATTGTTCGAGCTCCTTATAAAGATTTCAGTTTTTTAAAGCAAGAATGGGCTGCCATTCGCATTCAAACAGCTTTTCGTGGCTTCTTGGTAAAGTTGAAGTCTTTTTTTTTCCTTTACATGTTTGGTATCCGAGAAAGTGATGGAATG…	GhiIQD79	MGASGKWVISLIGLKITQKQHQEKVNNNKKWKLWRKFRSDSQSSDSFIAAMAAIVRAPYKDFSFLKQEWAAIRIQTAFRGFLARRALRALKGIVRLQALVRGRQVRKQASVTLRCMQALVRVQARVRARRVRMSIEGQTVRKMLDGHRSKDDVLKQAEDGWCGSKGTLEDVKTKLQMREKGPFKREKTLAYSLAQKQWKSVPGSTTRTNGLIPCLISQEFDKNSWGWNWLERWMVARPWETRLMELSTRTDPSKTCLESLSGKNERCSEPCSMKARKNNVTTRVSAKPPPHTRQVTRSSSSPSSEFRFDESSGSSSICTSTTPVSGTTVLPSDATGDSGNSRPNYMNMTVSTKAKQRSGNHGFQRQSMDEFEFKRSAGFDNRDSKSSKRGNCLYN	GhiIQD79	ATGGGTGCTTCAGGGAAATGGGTAATATCTCTTATTGGTCTCAAAATAACCCAAAAACAACACCAAGAGAAAGTGAATAACAACAAGAAATGGAAGCTATGGAGAAAGTTTAGATCAGATTCTCAAAGCTCTGATTCTTTCATTGCTGCCATGGCCGCCATTGTTCGAGCTCCTTATAAAGATTTCAGTTTTTTAAAGCAAGAATGGGCTGCCATTCGCATTCAAACAGCTTTTCGTGGCTTCTTGGCAAGGAGAGCATTGAGGGCTTTAAAAGGAATTGTGAGGCTACAAGCTTTGGTTCGAGGTAGACAAGTTCGGAAACAAGCCTCGGTGACGCTTCGATGCATGCAAGCTCTCGTTCGTGTTCAAGCTCGAGTCAGGGCTCGTCGTGTTCGAATG…
GH_D09G1141	GH_D09G1141.1	GhiIQD80	ATGGGTGTCTCAGGAAAATGGATCAAAGCATTGGTTGGCTTGAAAAAAACAGACAAGTCACAATCCTCAGAGAAGAAAGTAAATGTCAGTATGACTAACTATATATATTCTAAACAGTTTCTCCTATTTTGGAGGTTTAGATTGGGTATGTTATTGTGTAATATCATGTGTGCCTCTTCAAAATGAAGTGATGTCTTATTATCTCAAGTTATCTGGTACAATGGAAAGGGGTGTTTTATGGGAACTTACATGCAGCAATTTTCCTTGTTAGTCAAAAGAAATATATGATTTTGTTCTCTTCATCCATCCTAGTCCATGATGCTTTATGTCATTATCTGAATAATTGCACCTTTTTTTATGCTTCTTTCTATTCATCTAGTCTTATTGTTCCTTGTAGAA…	GhiIQD80	MGVSGKWIKALVGLKKTDKSQSSEKKVNRGATSKFRHRRKHSIDFDTDKLQEGLDQNAASPARDANTQAIADAAGSPSGSLEVRDAALNELVMEEWAATRIQTAFRGFLARRALRALKGLVRLQALVRGHAVRKQAAMTLRCMQALVRVQARIRARRVRLTLESETAQQKLQQQLADEARVKEIEEGWCDSIGSVEEIQAKLLKRQEAAAKRERAMAYALAHQWQAGSRQQSVPAGFEPDKSSWGWNWLERWMAVRPWENRFLDINLQDGVVACEDGSAEGKNGANSQIKPAIKKPAASNLHANLSNLKIGLSYSEGSDSPPGKSANVVDAVNALSSKPKSKPIIEDLGEEAGSKPVITSRSRSNPKERSIKSDKLVKKRLSLPNSGEGTGSQTSKTGK…	GhiIQD80	ATGGGTGTCTCAGGAAAATGGATCAAAGCATTGGTTGGCTTGAAAAAAACAGACAAGTCACAATCCTCAGAGAAGAAAGTAAATAGGGGAGCTACCAGCAAATTTCGTCACCGAAGGAAGCATTCCATTGATTTTGACACAGATAAACTTCAAGAAGGGTTGGATCAGAATGCTGCTTCACCAGCCAGAGATGCTAATACTCAAGCAATTGCAGATGCTGCTGGCTCCCCCTCTGGTTCACTTGAAGTGCGTGATGCAGCTCTTAATGAACTTGTAATGGAAGAATGGGCTGCCACAAGGATACAAACAGCTTTCCGTGGGTTTCTGGCTAGAAGAGCACTCCGAGCCTTAAAAGGATTGGTCAGACTGCAGGCCCTGGTGAGGGGTCATGCTGTAAGA…
GH_D09G1315	GH_D09G1315.1	GhiIQD81	ATGGGAAAGAAAAGGTGCTGGTTTAGTTGGGTGAAGAAGATATTCGCTTCTGATGCGAAACCAAAACCGGAAAAGGTTCATTTTTAACTCCTTTTTTTTGTTGTTGTTGTTGAGAATAATAGCTTTTGGTTTATAAAAAGTTTGATTGTACTTTGCAGAAATCAAGGAGGTGGAAATGGATTTTTAGAAGACTGAAACTAAAGCAATACCACCCTGCACTTCCCCCACTTCAAAAATCATTGTGTGAAGCAAGGGAAGAGCAAAGAAATCATGCTTTAAACGTAGCCATTGCAACAGCTGCCGCAGCGGAGGCTGCAATTGCTGCCGCCCAAGCAGCGGCTGAGGTTGTGCGTCTCACATCTGCCTCTAACCCTTCTCATCATTTCACTACAATCGACA…	GhiIQD81	MGKKRCWFSWVKKIFASDAKPKPEKKSRRWKWIFRRLKLKQYHPALPPLQKSLCEAREEQRNHALNVAIATAAAAEAAIAAAQAAAEVVRLTSASNPSHHFTTIDRNLAALNIQTAFRAHLARKALRALKGVVKLQAIVRGRAVRRQALINRKCLQSGTNMYPKVKEKSTSPTRVICQDSRRKQSLMNKDELQDKDIKGQYACNSEKSWNDSVLSKQDIEVKFLRSQEAMAKRERMKKYSYSHRERLNTRMLDELVHVKEAKAEANERDRVMISKLDVPSNLSTWEINGPPHVRHRKLKKQQDTLNGMNSPFSFPRRSFSRTQQSAAGDEGSIPNSPVFPSYMGATECAKAKARSRSTPRQRVGFWDSCFDNSGAYKGGLSLWSTYEGEPFSIDENCCL…	GhiIQD81	ATGGGAAAGAAAAGGTGCTGGTTTAGTTGGGTGAAGAAGATATTCGCTTCTGATGCGAAACCAAAACCGGAAAAGAAATCAAGGAGGTGGAAATGGATTTTTAGAAGACTGAAACTAAAGCAATACCACCCTGCACTTCCCCCACTTCAAAAATCATTGTGTGAAGCAAGGGAAGAGCAAAGAAATCATGCTTTAAACGTAGCCATTGCAACAGCTGCCGCAGCGGAGGCTGCAATTGCTGCCGCCCAAGCAGCGGCTGAGGTTGTGCGTCTCACATCTGCCTCTAACCCTTCTCATCATTTCACTACAATCGACAGAAACTTGGCTGCTCTTAATATCCAAACTGCTTTTCGGGCACACCTGGCAAGGAAAGCACTGAGGGCATTGAAGGGAGTAGTG…
GH_D09G1630	GH_D09G1630.1	GhiIQD82	ATGGTTGTCTTCTTTGAAGAAAGTGTTCAGCCCAGATTCCCAGGAAAAAAAAACCAGGTTTGAAGAAAATCCCATTCACCTAATTGTGCCTTTGCAGTAGTTTATAGTCCTCAATGAGTTTTTAGTATTCTTGATTGCTATGTTTTTCAGAAATCAAAACAGCAGTTGTTGGAGAAGCAGGTGCATTTGGGTTCCAATGATTCTGGTGCAGCCACTTTAGAAACTGTCAACTTGTCCCCTCCTCCGCCAGAAGAAGTTAAACCGATTGAAGCTGAAAGCAAGCAGACTTACCCTGTGGTAGTTGCCACTGCTGCTGCTTCACCTCAGGCTGCCGTAGAGGTTGTTCAACGTCAGCTTAATAGAGATGCTCTGTTCGCTGGAAAATCTGAGGAGGAAGTG…	GhiIQD82	MVVFFEESVQPRFPGKKNQKSKQQLLEKQVHLGSNDSGAATLETVNLSPPPPEEVKPIEAESKQTYPVVVATAAASPQAAVEVVQRQLNRDALFAGKSEEEVAAIKIQTAFRVYLARRALHALKGLVRLKSLMEGPVVKRQAASTLRCMQTLSRLQCQVRIRRTRMTEENQALQRQLLQKHAKEIVNLQMGEDWDDSLQSKEQIEASLLSKHEAAMRRERAMAYSFTHQQTWKNASRSMNPLFMDPNNPSWGWSWLERWMAAQPQEGRGTTEKEQNDQSSIRSARSNFGGEISKAYARYQLNLDKQSPKAGQKPNQTSSLLSVSTPKTSASIPARKLKSASPRSSVVGPDDDGRSMVSIQSERNRRHSIAGSSVHDNEGLGSSPLLPSYMVPTESTRAK…	GhiIQD82	ATGGTTGTCTTCTTTGAAGAAAGTGTTCAGCCCAGATTCCCAGGAAAAAAAAACCAGAAATCAAAACAGCAGTTGTTGGAGAAGCAGGTGCATTTGGGTTCCAATGATTCTGGTGCAGCCACTTTAGAAACTGTCAACTTGTCCCCTCCTCCGCCAGAAGAAGTTAAACCGATTGAAGCTGAAAGCAAGCAGACTTACCCTGTGGTAGTTGCCACTGCTGCTGCTTCACCTCAGGCTGCCGTAGAGGTTGTTCAACGTCAGCTTAATAGAGATGCTCTGTTCGCTGGAAAATCTGAGGAGGAAGTGGCAGCAATAAAGATCCAAACAGCTTTCCGAGTTTACCTGGCTAGAAGGGCATTGCATGCTTTAAAAGGATTGGTCAGGCTGAAATCATTGATG…
GH_D09G2241	GH_D09G2241.1	GhiIQD83	ATGGGAAAGAAGGGAAGTTGGTTTTCTGCAATTAAAAAAATTTTCTTTCCACACTCCAAGGAAAAGCTAAATAATGTAAGTTGTTATTCTAACAATGATGCATATGAACTTCACCATTTCATCCGTGCTTTTGTTTCAACTCTACAAATTTATACAATCGTAGATGATATATGGTTGCTTAATTTCGTTCTTTCTCTTGTGTATGAAGTTTAAACATGCCTGTAGGTTGTGCTGGCATGAAAAACAGTTTTATGTTCTCAAACCAGTTTGTGATTACTGAATAGAAGAGCATAAGAACCTGGAATTTGGAAAAAGGGTCTAAAACAAAAGTGGATATAATTAGTTGCCTTTTGATGAACTATAGATGCATCTAATTGGAGTGTGAAATTTCTGATTGAA…	GhiIQD83	MGKKGSWFSAIKKIFFPHSKEKLNNESEKRSDKEKKKGPGKLRHGETNSFLPLFRKPSSIEKILGEAEREHNLIFRPPTPPEQPRTPPFVPHRPASPQGPSPRVASPRVASPRAASPPRAASPRAASPPPPPPPPPRAASPRVASPRGASPKPAPSRIVRPRPEPTLKNQHASATQIQAAYRGYKTRRSFRALKGLVRLQGVVRGQHVKRQTTNAMKYMQLLVRVQSQIQSRRIQKLENQERQQAESKEAESTLGKWTSQSEAGNENWDDTVLTKEEREARMQRKVEAVIKRERAMAYAYSNQLWKSTPGSGIRSGGFPWWWNWLDHPLPPVNAPGSQGTKSFQLTPPRPNSQLKPSSRPQSSSSRQRQFTYDNIMETPTPKSTRSTILHAKRRMRTPP…	GhiIQD83	ATGGGAAAGAAGGGAAGTTGGTTTTCTGCAATTAAAAAAATTTTCTTTCCACACTCCAAGGAAAAGCTAAATAATGAATCGGAAAAAAGAAGTGATAAAGAAAAGAAGAAAGGCCCAGGAAAATTAAGGCATGGAGAAACCAATTCCTTCCTTCCCCTCTTTAGAAAGCCCAGCAGTATAGAGAAAATTCTGGGGGAAGCTGAACGAGAGCATAATCTAATATTCAGGCCTCCCACACCTCCGGAGCAGCCAAGAACACCACCTTTTGTGCCTCATAGACCTGCATCTCCACAGGGTCCATCTCCAAGGGTTGCCTCTCCTAGGGTTGCTTCTCCAAGAGCTGCTTCCCCTCCACGAGCTGCATCCCCTAGAGCTGCTTCACCACCTCCACCTCCACCT…
GH_D09G2334	GH_D09G2334.1	GhiIQD84	ATGGGGAAGACAGCGAAATGGTTGAAAAGCCTGTTGACTGGTAAGAAAGACAAAAGTAGAAACATAAGTAATAATCAGAATTCTTCAGTTGTCCCTGAGAATCCAACGACGACCGTTTCGATCCCACTGCCACCGACAACTCCTAAAGAGAAACGACGATGGAGTTTCCGGAGATCTTCGGCTTCAGCGACGCCTGTTAGGGAGTTGAATTCTGTAGAACAAGTGGTTACCCCTTCACCTCCACCACCACCGGCTCCGCCGGTTGTGACGGATGTGATCCGGGTAAGTGGTAGTGCTGACGATGAGAAAGTTGATGCAGGTGAAGAGGCCGCTGCTAAGATGATTCAAGCTGTGTTTCGATCTTACCTGGTATGTTATAATTTGTTAGATTTGATGGCT…	GhiIQD84	MGKTAKWLKSLLTGKKDKSRNISNNQNSSVVPENPTTTVSIPLPPTTPKEKRRWSFRRSSASATPVRELNSVEQVVTPSPPPPPAPPVVTDVIRVSGSADDEKVDAGEEAAAKMIQAVFRSYLARKALKALKGIVKLQALVRGHLVRRQASVTLKCMQALVTAQARARARAQRIRMVEDSRPASRRQSPHRRSTTPDQRLRHGYHEIDSGVEENIKIVEIDHGDSKASLQSRNSYSMEHRFSNPQASPVTSSYLADQISPGACSGHFEDHFFTVAQSSPHYAESETFEYSFCPNYMANTESSRAKARSQSAPKSRPDSIERQPSGRRRSSTEGRNHVPKAMKMKRSSSHVGAAEKNSQYQYQYQYPWSIKLDRSSVSLIDSECGSTSTVLTNTNYCRSH…	GhiIQD84	ATGGGGAAGACAGCGAAATGGTTGAAAAGCCTGTTGACTGGTAAGAAAGACAAAAGTAGAAACATAAGTAATAATCAGAATTCTTCAGTTGTCCCTGAGAATCCAACGACGACCGTTTCGATCCCACTGCCACCGACAACTCCTAAAGAGAAACGACGATGGAGTTTCCGGAGATCTTCGGCTTCAGCGACGCCTGTTAGGGAGTTGAATTCTGTAGAACAAGTGGTTACCCCTTCACCTCCACCACCACCGGCTCCGCCGGTTGTGACGGATGTGATCCGGGTAAGTGGTAGTGCTGACGATGAGAAAGTTGATGCAGGTGAAGAGGCCGCTGCTAAGATGATTCAAGCTGTGTTTCGATCTTACCTGGCAAGGAAAGCTTTGAAAGCGTTGAAAGGG…
GH_D10G0332	GH_D10G0332.1	GhiIQD85	ATGGGTTCTGGAAATGTGTTGAAGACACTAGTGAATATAGTGAAGGATGACAGCTCAAAGCAAGTGAAGGTATATCTATCATTATTTTACTTAACAATCATAAGCTAAGCTCTGCAAGTTTTCTGTTATCTTGTTATGAATAAAATCTGAGTTTGGTTCTGAAATAATTCATTTGCTATTTGAATCTTTTGGACTAATGTTATCCAAATTCCAAACCCTTTTGGGAAGTGTAATCTTATGTACCATTGGAATGACAAAATTTGAAGCTTTTAGTTACTTTTTTTTCAATGAATCCGAGCTCATATTCGGCTATAAGTGTCACTTCTATACCTTCCCTGACACCATTTGTTCAATTTGGTTTTGTCATATGCCAACATCTGAATATGCGTTTGGATGCTT…	GhiIQD85	MGSGNVLKTLVNIVKDDSSKQVKRSSASTKSKGFKWKKLQRKTSMRTKFIRDSAALGMSIEDLAATRIQTAFRAYRARKKLRLLKGIVRLQAKTKTYSIKKQATTTLNYLHSWSNIQAQIRARRLCMVTEGGLRQKKIANQLKLEAKLHELEVEWSGGPGTMEEVLTKIHQKEAAAVKRERTMAYAFSHQWRAPNSINNGLGSYKLAKANWGWSWVERWIAVRPWERRLPTPSTTPKSTPKEPQNKQTSKGGKNSNSPKPKASVSVKPPLSNAKGAMKPRRLSYPGAEKPAARQVNTKADKINIEKEEIST	GhiIQD85	ATGGGTTCTGGAAATGTGTTGAAGACACTAGTGAATATAGTGAAGGATGACAGCTCAAAGCAAGTGAAGAGATCTTCAGCTTCTACAAAATCCAAAGGCTTCAAATGGAAGAAACTCCAGCGAAAGACGTCCATGAGAACAAAATTTATTAGAGATTCCGCTGCTCTTGGTATGTCAATTGAGGATTTAGCAGCAACTCGGATTCAAACCGCATTCCGAGCCTATAGGGCTAGAAAAAAATTACGTCTATTGAAAGGTATAGTAAGATTACAGGCTAAAACCAAAACTTATTCAATCAAAAAGCAAGCTACAACAACATTAAATTATCTTCATTCATGGAGTAACATACAGGCTCAGATAAGAGCTCGTCGACTATGTATGGTAACGGAAGGCGGTCTT…
GH_D10G1333	GH_D10G1333.1	GhiIQD86	ATGGGAAAGAAAGGAAGTTGGTTTTCTGCAATTAAAAGGGTTTTCATACCACACTCCAAGGAAAAGCTAAGTAATGTAAGTTCGTATTTTTAACTAGGTGCATATGGACTTCGCTACTTTGTCTATGGTTTTGATTAACTATATGAAAAGAACGTACTAATTGTAGATGTTTTTTATTGTTTAATTTCATCATCTATCTCATATTTTTGTTAGAGAAAAACTTACATTTTGTGTATAAGGTTCAAACATCCAGCAGATAGTTGTGATTGCTGATTAGGTAAACAAAAGAACCCGGCATTTGGAAAGATGTCAAAATAGAAATGGGTAGAATTAGTTGCCTTTGGAGAGTGAAATTTCTGATTGAAGACATTTTTGTTGCATAGTCAGCTCTTGAAGTCA…	GhiIQD86	MGKKGSWFSAIKRVFIPHSKEKLSNESDKRSGKEKKKKGLGKLRHGETNSFIPLFREPSSIEKILGEAEREHKLVFRPPTPPEQPTTPPFVPHKDASPRVPSQRIASPRIASPRAASPRTVSPPRAASPRAAPPKVVCPRPEPTLRNHHASATKIQAAYRGYMARRSFRAWKGLVRLQGVVRGQNVKRQTSTAMKRMQLLVRIQSQIQSRRIQMLENQARQEVHFKNDKEVESTLGKLAFSQASEAGNEDWDDSVLPKEEIEARMQRKVEAVIKRERAMAYAYSHQLWKTTPKPVHADIRTRGFPWWWNWLERQLSSSNTPESQGIKNFPLTPPRPNSELKPSPKPPLSSKQHQFMFDNMDTPTPKSTRSTTRPMQTPPSRILQGSSSGLSKYSRPRAS…	GhiIQD86	ATGGGAAAGAAAGGAAGTTGGTTTTCTGCAATTAAAAGGGTTTTCATACCACACTCCAAGGAAAAGCTAAGTAATGAATCGGATAAACGAAGTGGTAAAGAAAAGAAGAAGAAAGGCCTAGGAAAATTAAGGCATGGAGAAACCAATTCCTTTATTCCCCTCTTTAGAGAACCCAGCAGTATTGAGAAAATTCTTGGGGAGGCTGAAAGAGAGCATAAACTAGTATTCAGGCCTCCAACACCTCCAGAGCAGCCAACGACACCACCTTTTGTGCCTCATAAAGATGCTTCTCCAAGAGTTCCTTCACAGAGGATTGCCTCTCCTAGGATTGCTTCCCCGAGGGCTGCTTCTCCAAGAACCGTTTCCCCTCCACGAGCTGCTTCTCCAAGAGCTGCTCCA…
GH_D10G2782	GH_D10G2782.1	GhiIQD87	ATGGCGAAGAAGAAGAGCTGGTTCAATCTAGTGAAGAGGTTCTTTCTCTTTGAGACACTTATAAATGCACAAAAGGTAACTCCCCCCCCCCCTTTTGTTTTCGCTGTTCTTGTATGGATGAATGGCTGTCATGGATGTTAATATGTTATATATATCTGTCGGTAGGATAACAGAAGGAAATGGATGTTTGGAAGGTTTAGGACCAAAAGGTTAGCATCCATTAAAGCTCCATCACCACCAAGAGACAGCATAAAATATGAAACAGAGGAAGACCAGAAGAAACATGCCTTAACAGTGGCAATTGCCGCAGTGGCTGCTGCTGAAGCAGCTGTTGCAGCTGCTCAGGTTGCAGCCGAGGTTGTTCGCCTCACAGGCGCTGATGCCCCTAAAGCTAAAGAA…	GhiIQD87	MAKKKSWFNLVKRFFLFETLINAQKDNRRKWMFGRFRTKRLASIKAPSPPRDSIKYETEEDQKKHALTVAIAAVAAAEAAVAAAQVAAEVVRLTGADAPKAKEEQTIDVKPDCSSSSELDNQFQQLAAVKIQASFRGYLARKALRALKGIVRLQAIIRGRVVRRQALTALKCLQSIVNIQSQVCARRFQMVEGTWQQHDENKELITLKDKILKVDTNSQTRWDNCNGRLKYWLDQWVDTKSKDVEVEDIDSVWTSNRKPTRLKTFSRQYHCDAEGVDSPVRVQRRRSFHGKQSSLGEDSSFITSPVVPTYMAATQSTKAKVRSMSSPKLRPGTCDTQSESYSPYKNKLCLISSVTSKPNAYEQRSPTLKGIKSKQTLKDLSFDSECSLPNWVQKSTFK	GhiIQD87	ATGGCGAAGAAGAAGAGCTGGTTCAATCTAGTGAAGAGGTTCTTTCTCTTTGAGACACTTATAAATGCACAAAAGGATAACAGAAGGAAATGGATGTTTGGAAGGTTTAGGACCAAAAGGTTAGCATCCATTAAAGCTCCATCACCACCAAGAGACAGCATAAAATATGAAACAGAGGAAGACCAGAAGAAACATGCCTTAACAGTGGCAATTGCCGCAGTGGCTGCTGCTGAAGCAGCTGTTGCAGCTGCTCAGGTTGCAGCCGAGGTTGTTCGCCTCACAGGCGCTGATGCCCCTAAAGCTAAAGAAGAACAAACCATTGATGTTAAACCTGATTGTTCTTCATCTAGTGAGCTTGACAACCAGTTCCAACAACTTGCTGCTGTAAAAATCCAGGCT…
GH_D11G0175	GH_D11G0175.1	GhiIQD88	ATGGTAAACAAAACACCGACCTCGTGGTTGTCAATGGTGAAAAGGGCTCTCGGGTCTAATGCTAAAGATAACGAGAAAAAAAGTTGCAGAACAAGAGAGAAAAGAAGATGGCTATTTAAATGGTCTCAACAACGTAAACCCAAAACCAAATCACAATCCATTGCAGCTGTTAACATCGTTAGGCTTAATTGCAGAGCTTCCAATTACGCCATTGTTGGAGAAAAAAACCAAGCTGCTATTGTCATCCAAACAGCTTTTAGAGGCTACATAGTATGTGAAAGATTCTCTCTCTGTATATAATTAACTGTTTATTTAGTGTTTTTGATGATTTTTTTTTTTGTGAAAGGCAAGGAAAACATTTGGAGCATTGAAAGGGGTAGTGAAGCTTCAAGCTTTAGT…	GhiIQD88	MVNKTPTSWLSMVKRALGSNAKDNEKKSCRTREKRRWLFKWSQQRKPKTKSQSIAAVNIVRLNCRASNYAIVGEKNQAAIVIQTAFRGYIARKTFGALKGVVKLQALVRGHNVRRRAKVALKCMQSLVRVQNPVLLHQQRARLSYEGCRTAMFIESNSSWESPCLQDVRRRKSITLDKDEKEVEEATKWLDRRRATKQWESHNRASIDKRDSIREPLQLRLASLRCLKEKSSYHSAANSPRLTMVPNYMAATESAKAKVRSQSTPRQRPGNAERAGGGKISPRSTSDLRWMKL	GhiIQD88	ATGGTAAACAAAACACCGACCTCGTGGTTGTCAATGGTGAAAAGGGCTCTCGGGTCTAATGCTAAAGATAACGAGAAAAAAAGTTGCAGAACAAGAGAGAAAAGAAGATGGCTATTTAAATGGTCTCAACAACGTAAACCCAAAACCAAATCACAATCCATTGCAGCTGTTAACATCGTTAGGCTTAATTGCAGAGCTTCCAATTACGCCATTGTTGGAGAAAAAAACCAAGCTGCTATTGTCATCCAAACAGCTTTTAGAGGCTACATAGCAAGGAAAACATTTGGAGCATTGAAAGGGGTAGTGAAGCTTCAAGCTTTAGTGAGAGGGCACAATGTGAGAAGGCGAGCAAAGGTGGCACTAAAATGCATGCAATCTTTGGTTCGAGTACAAAATCCA…
GH_D11G0334	GH_D11G0334.1	GhiIQD89	ATGGGAAAATCACCGGGAAAATGGATTAAGGCTGTGCTTTTTGGAAAGAAGTCTTCCAAATCTGGTTATCATAAAGGAAGGGAGGTAATATTTATTGCTAATTACTACTAAACGAAAAATATAATGTTTAGATTATGTACATGAGGAACTGCAAATATAGTTCCTCTGTCATTTGGTTTATTTTTGGTGGCTTCATTCCCTCTACTGAGAAAGTTAAGTAATTGTAAAGGATTAGCTGATTTGAACAGTAGCTTCCCCGAAATTTCTCGGGAGCTGTTGTATTTAACATGGCTGTTTTAATGCTTTGGTTTTGGGAATGTATCATTCTTTCCTCGAGTTATGAGATAAACATGATATGGCATCTTTCTTCCATCAATCCTAAAATATTTATGTACACTT…	GhiIQD89	MGKSPGKWIKAVLFGKKSSKSGYHKGRENVANVNEVLVSARASEAEVPVAPPFPSQLNQYANERNERDEGKLELENKEAANIYNDDRISLPVSQGIGSQESTLQDFQNDPERMKQKQAATIVQAAFRGYLARRAFWALKGIIRLQALIRGHLVRRQAIATLCCVMGIVKLQSHIRGVMARRSDGGLEVHKKYNQMNLWESKPVVSLGVNMPARIGKLSANTFVRKLVASSPPVMPLRLHDDTGEPNSVWNWLERWSASCFWKPVPQPKKASKLQKKQANGQVVETDSGRPKLSVRRIRPANLDGASVQATSEFDKPKRNLRKVSSHPAEMAVQENPQNELEKVKRNLRKVHNPVVENSVQSRVEPDKPKQSLEKFSSATNPDVVEQSLNSLAEKANKEM…	GhiIQD89	ATGGGAAAATCACCGGGAAAATGGATTAAGGCTGTGCTTTTTGGAAAGAAGTCTTCCAAATCTGGTTATCATAAAGGAAGGGAGAATGTTGCCAATGTAAACGAGGTGTTGGTTTCAGCCAGGGCATCAGAAGCTGAAGTCCCTGTGGCTCCTCCCTTCCCTTCACAGCTTAATCAATATGCTAATGAGAGAAATGAGAGAGATGAAGGGAAATTAGAACTGGAAAACAAGGAGGCTGCAAATATCTATAACGATGACAGGATATCACTACCAGTGAGTCAAGGCATAGGTTCTCAGGAATCCACTCTTCAAGATTTCCAAAATGATCCTGAAAGAATGAAGCAAAAGCAAGCAGCAACCATCGTTCAGGCTGCTTTTAGGGGTTACCTGGCTCGCCGA…
GH_D11G1078	GH_D11G1078.1	GhiIQD90	ATGGGGAAGAAAGGAGGGACTTCCTGGTTGACTGCTGTGAAAAGGGCTTTTAGATCTCCTACTAAAGACGGTCATGATAAGAGAAGTAACAGAAGAAAGGATGAACCTGACCACCAAGATGAGGATGAAGACAAGGTTTGTATTTATAGTATCAATGAACTCTTCATTCATTACTATACATGAAAACAGAAGAAAATAAAACAAAACAAAAAAAAAAGTAAATGAAGTTGAATCTTTTACTGTAAATATAATTCTTGATCTGTTACTGGTTTTGGTAGAAGAGAGAGAAGCGAAGGTGGATCTTCAGGAAACCCACAATTCAAGAACCGGTGATTCATCAGCAAACAACACCAGTGAAGGCTACAGGTCGTAATGGTGCAGGTGCAGCATCAGATGGTG…	GhiIQD90	MGKKGGTSWLTAVKRAFRSPTKDGHDKRSNRRKDEPDHQDEDEDKKREKRRWIFRKPTIQEPVIHQQTTPVKATGRNGAGAASDGATATAAEQRYDTPRAATEGAAVVQVARPTRPSNYAREHHLAAIVIQTTFRGYLARRALRALKGLVKLQALVRGHNVRKQAKITLRCMQALVRVQARVLDQRVRLSHDGSRKSAFSDTNSVLESRYLQDISDRRSLVSREGSSIADDWDERPHTIEEVKAMLEHRKEAALKREKNLSQALSQQMRRARRSPSMGDEDEVECRPKWLDRRTPAKPWDNRGRASTDHRDSDKTVEIDTSQPYSYLAPIYRRTNSNQYHQHGPQNQRPSSPLHRAQQNAPMHHSPVTPSPSKARSIQVRSSSPRCVRGDRSSVSSQTP…	GhiIQD90	ATGGGGAAGAAAGGAGGGACTTCCTGGTTGACTGCTGTGAAAAGGGCTTTTAGATCTCCTACTAAAGACGGTCATGATAAGAGAAGTAACAGAAGAAAGGATGAACCTGACCACCAAGATGAGGATGAAGACAAGAAGAGAGAGAAGCGAAGGTGGATCTTCAGGAAACCCACAATTCAAGAACCGGTGATTCATCAGCAAACAACACCAGTGAAGGCTACAGGTCGTAATGGTGCAGGTGCAGCATCAGATGGTGCAACCGCAACAGCCGCAGAGCAAAGGTATGATACTCCTAGGGCAGCAACCGAGGGTGCAGCAGTGGTACAAGTGGCTCGCCCAACTAGACCTTCAAATTATGCTAGAGAGCACCACCTTGCTGCCATTGTTATTCAGACTACT…
GH_D12G1345	GH_D12G1345.1	GhiIQD91	ATGGGGATGAAAGGAGGGACTTCATGGTTGACTGCTGTGAAAAGGGCTTTTAGATCTCCTACTAAAGATACCCATGAAGATGAAAAGGTAAGTGTTTCAATCTATTTTAATGGCTGTTTATGAATCTAAAAAGAAAACCCTTTGATTTTTTTTTATATAGAAGAGAGATAAACGGAGGTGGATCTTTAGGAAACAAAATACAAGTCCTGTGAAGAGTGTAGGTAATAATGGTGGTGGTGGTGCAAGTACGGCAGCAGCGGAGCAAAGACATGCTATTGCTGTGGCGGTGGCTAAAGCAGCTGAAGCTGAAGCTGCGGTGGCGACGGCACAAGCAGCTTTACAAGCTGCTCGGTTGACTAAACCTAGTTATGGCAGGAAACATCACTTTGCTGCTATTGT…	GhiIQD91	MGMKGGTSWLTAVKRAFRSPTKDTHEDEKKRDKRRWIFRKQNTSPVKSVGNNGGGGASTAAAEQRHAIAVAVAKAAEAEAAVATAQAALQAARLTKPSYGRKHHFAAIVIQTAFRGYLARRALRALKGLVKLQALVRGHNVRKQAKMTLRCMQALVKVQSRVLDQRMRLSHDGCSRKSAFSDTNSVWESRYLQDISDRRSLSREGSSIADDWDERPHTVEEVKAMLQHRKEAALKREKSLSQALSQQMRRARRSPSMGGQDEWLDRWMPAKPWDNRGRASMDQRDNVKTVEMDTSQPYSYLAPNYRRTNSNHYHQRPSSPLHRAQHNAQPFHPSPITPSPSKTRPVQVRSASPRCVREDRTSFSSSQTPSLRSNYYYTGRVSTQASTSINNATTLPNYM…	GhiIQD91	ATGGGGATGAAAGGAGGGACTTCATGGTTGACTGCTGTGAAAAGGGCTTTTAGATCTCCTACTAAAGATACCCATGAAGATGAAAAGAAGAGAGATAAACGGAGGTGGATCTTTAGGAAACAAAATACAAGTCCTGTGAAGAGTGTAGGTAATAATGGTGGTGGTGGTGCAAGTACGGCAGCAGCGGAGCAAAGACATGCTATTGCTGTGGCGGTGGCTAAAGCAGCTGAAGCTGAAGCTGCGGTGGCGACGGCACAAGCAGCTTTACAAGCTGCTCGGTTGACTAAACCTAGTTATGGCAGGAAACATCACTTTGCTGCTATTGTTATTCAGACAGCTTTTAGAGGCTACCTGGCCAGGAGAGCTCTACGTGCGTTAAAAGGGCTAGTGAAGTTACAA…
GH_D12G2626	GH_D12G2626.1	GhiIQD92	ATGGGAAAGAACACTGCTACCTCTTGGTTGTCAATGGTGAAAAAGGCCTTTAGGTCTCCAGGTAAAGATTATGAGAAAAAGAGTAGCAGGAGAGAAGAATGTGGGCATCAGGAAGAGGATGAAAAGGTAGTATATAGTAATTAACAACTTCATCATTCTCTTGCATTTATTTTTTGTAGTATAATTTATTTAATTAAGTTGGTGGTGGGTGCATGGCTTTTTTTGGGGTTGTGCAGAAGAGGGAGAAAAGAAGATGGCTGTTTAGAAGGGGTAGTAGTAATATCAATCATGTCCAACAGTGTGAAGCAAAGATACCAACACCAACGACATCGACAAGTACTGCTACACCACCTGCGAACAATGCAGCAGAAACAGCATTGGATTTTGCAGAACAACGGC…	GhiIQD92	MGKNTATSWLSMVKKAFRSPGKDYEKKSSRREECGHQEEDEKKREKRRWLFRRGSSNINHVQQCEAKIPTPTTSTSTATPPANNAAETALDFAEQRHAIAVAAAEAAVATAQAAVEIVRLSSRPSNYANVREHYHYAAIVIQTAFRGYLARRALRALKGLVKLQALVRGHNVRRQAKLALKCMQSLVRVQDRVLDQQRARLSHEGYRRKSMFDETNALWETRYLQDIRRRKAMSRDMSCTTDEWNDRPQTSEEIEALLLTKKEAALKREKALAYAFSNQIWRSRRNPSAEDEKEVEERTKWLDRWMATKQWDNNNRVSTDKRDSIKTVEIDSYKLQSYSSPTIRRRHSLSLNQFPPTPSPCKTKPSQVRSASPRCLKEEKYYTSAANTPSLASTYCTTN…	GhiIQD92	ATGGGAAAGAACACTGCTACCTCTTGGTTGTCAATGGTGAAAAAGGCCTTTAGGTCTCCAGGTAAAGATTATGAGAAAAAGAGTAGCAGGAGAGAAGAATGTGGGCATCAGGAAGAGGATGAAAAGAAGAGGGAGAAAAGAAGATGGCTGTTTAGAAGGGGTAGTAGTAATATCAATCATGTCCAACAGTGTGAAGCAAAGATACCAACACCAACGACATCGACAAGTACTGCTACACCACCTGCGAACAATGCAGCAGAAACAGCATTGGATTTTGCAGAACAACGGCACGCAATTGCCGTTGCAGCAGCTGAAGCTGCTGTGGCAACAGCACAAGCGGCTGTTGAGATCGTTAGGCTTAGTTCTAGACCTTCCAATTATGCCAATGTTCGAGAACAC…
GH_D12G2716	GH_D12G2716.1	GhiIQD93	ATGGGAAAGAAAGGGAGTGGATGGTTCTCGACGGTGAAGAAAGTGTTCAAATCATCTCACAAAGACTTGCCTGACAAAAAAGTAACGTAATTTTTTCATCGGTTTTTAGGTTTTTTTTTTTTTGGCCTTTTGATGTTTGTTTAGCAGGTTGATTTGATTGCCATATTTTCAAGCAAAATCAATGGCACCTTTCAAAATTTTTTTTTCATTTTAAGGCAAATTTTTAATAAATGCAGGGAAAAAAAAAGAGAAAGCAAACATCTACATCACAAACATCTGGATTTTTGCTTGTATTTATTTGGGTTCTTATCTTTTTGTTGTTAGAACTTGGTTAACTATATAGTGCCCACGTTTGCAAGTACATTACAAATTCTCTTTGATCTTACTCATTTGTGGTCA…	GhiIQD93	MGKKGSGWFSTVKKVFKSSHKDLPDKKRENNVEKWPNEAPDAVSFEHFPAESSPDITNNESAMSTPLNEDRNHAIAVAMATAAAAEAAVAAAQAAAKVVRLAGYGRQSKEERAATLIQSYYRGYLARRALRALKGLVRLQALVRGYNVRKQAQMTMRCMQALVRVQARVQARRLQLTDHDKIPKRSDEDYEEKKGTGEVERKPRSLLKRYDSWDGGQQSSEKVKESVSKKHDAAMRRERALAYAYSYQQQQPQQQLMQPHPNGKDVGVHLNDREKAQWGWNWLEHWMSSQPYDARQLGHQEGSYMTLLTTTATTTVTDNMSEKTVEMDVVTAMDSGSYSTLQQAQSGSSNVPSYMAPTQSAKAKVRSQGPMIMKQQRVPHAPQWNPSTKKSPGCDSSSS…	GhiIQD93	ATGGGAAAGAAAGGGAGTGGATGGTTCTCGACGGTGAAGAAAGTGTTCAAATCATCTCACAAAGACTTGCCTGACAAAAAAAGAGAGAATAATGTGGAGAAATGGCCAAATGAGGCCCCGGATGCAGTGTCGTTTGAACATTTTCCAGCGGAGAGTTCACCGGACATCACGAATAATGAGAGTGCAATGTCGACTCCTCTGAATGAAGATAGGAACCATGCCATTGCTGTCGCCATGGCAACTGCTGCTGCTGCAGAAGCAGCTGTTGCGGCAGCTCAAGCTGCCGCTAAAGTCGTCCGGTTGGCGGGTTATGGACGACAGTCTAAGGAAGAAAGAGCTGCAACGCTTATACAGTCGTATTATAGAGGCTATCTGGCTCGGAGAGCTTTGCGTGCTTTG…
GH_D13G0120	GH_D13G0120.1	GhiIQD94	ATGGGAAAGAAAAGGAGCTGGTTTAGTTGGGTGAAAAAGATTTTTGCTTCTAATGCACAACCAAAAACACAGAAGGTTCATTTTCAGTACTTGTTACTTTTCAACTTTTGCTTCTTCTTTTTTTTTTTTGAATAATTAATAGCTTTTTGATTCATCTTTTTGGTTCTTTTTTCCTTTTTGCTTGTAATAATTTCGGTTTTACTTTTCAGAAATCAAGGAGGTGGAGATGGATTTTCGGAAAACTAAAGCTCAAGCAATGCCGCCCTGCATTACCGGCGATACCCCAGCAGAAATCGTTATGTCAAGCAACCGAGGATCAAAGAAAGCATGCTTTGAATCTTGCCATTGCGACAGCTGCTGCAGCTGAAATTGCGGTTGCTGCAGCACAAGCGGCAGCCG…	GhiIQD94	MGKKRSWFSWVKKIFASNAQPKTQKKSRRWRWIFGKLKLKQCRPALPAIPQQKSLCQATEDQRKHALNLAIATAAAAEIAVAAAQAAAEVVRLANASNHFSNFTTKDRNRAAIKIQTAFRAHLARKALRALKGLVLLQAIIRGQVTRRRAMKNMKCLQSGTEMYPEIKEKVICQDTRRNQSLVHKDQLQVKDIIEHEYYSRRNWNDSVFSKEDAEAVWLRRQEAMAKRERMKKYSYSHRERVNSYMLDESVHVKETGRNSFLEAEANSEGTRRERMMILKHNVASNSSTWKVDGLHGLNSPYLFPRRSFCRVQNQNPAGNESSVPSSPVFPTYMAATESAKAKVRSMSTPRQRLGLSDTCFDHNMPYKGGLSLWSTYNGETFKYQ	GhiIQD94	ATGGGAAAGAAAAGGAGCTGGTTTAGTTGGGTGAAAAAGATTTTTGCTTCTAATGCACAACCAAAAACACAGAAGAAATCAAGGAGGTGGAGATGGATTTTCGGAAAACTAAAGCTCAAGCAATGCCGCCCTGCATTACCGGCGATACCCCAGCAGAAATCGTTATGTCAAGCAACCGAGGATCAAAGAAAGCATGCTTTGAATCTTGCCATTGCGACAGCTGCTGCAGCTGAAATTGCGGTTGCTGCAGCACAAGCGGCAGCCGAGGTCGTTCGTCTGGCTAATGCCTCTAACCATTTCAGTAATTTCACAACAAAGGATAGGAACCGAGCTGCTATTAAGATCCAAACCGCTTTCCGGGCACATCTGGCAAGGAAAGCCCTACGGGCACTAAAGGGA…
GH_D13G0741	GH_D13G0741.1	GhiIQD95	ATGGGAAAATCTCCAGCAAAATGGATCAAGACCTTACTTCTTGGGAAGAAATCTTCAAAGTCCAGTTTCTCAAAAGAAAAAGAGAAGCTGGTGAGGAAGTACTAATTATCTTCAAATATTAAATAGCACTTGAAATGTTGCATTTTCTAATTTTGTTGATTATTATGTTCAGAAATCTGCAAATAAAGGTGAGGTTTTGGTTTCTTCCAAGGTGACTGTGTCTGACCTATCAGTGGATCCTCCATCAATTTCAGCACCTATTCTAGTGAATAGCGCTAGGAATGTGGTGGACTCTGAGAAGGGTATACCTGCGCAATTGCCGAATGATGGGGCAAATATTCCATCTCCAAAAGTGGATGGAAATGGTGCCACAACTGGTAATTTTGGTAACCCAGAAAA…	GhiIQD95	MGKSPAKWIKTLLLGKKSSKSSFSKEKEKLKSANKGEVLVSSKVTVSDLSVDPPSISAPILVNSARNVVDSEKGIPAQLPNDGANIPSPKVDGNGATTGNFGNPENPDRIRLDPAAVMVQAAFRGYLARRAFRTLKGIIRLQAVIRGHLVRRQAVATLCCTWGIVKLQALARGQKVRCSDIAMEIQEKHLRLLQGSKSSDSIGVSTSSKVKNLSNNVFVQKLLASSPSVLPLQLQYVPEEPNSSWQWLQRWTMSHFWLSPLKPVRSGKTKRSILKLSNAKVVNGSSHSTLEHEKNKRGLRRVSGNSAADSVRKHPQNELERVKRSLRKLSDSSKEVSDKSEVFNEKTKKTLKKTSNSNDPDFSEQESAEKIRDVAATLSELSILEADMKMSSEDPSLGE…	GhiIQD95	ATGGGAAAATCTCCAGCAAAATGGATCAAGACCTTACTTCTTGGGAAGAAATCTTCAAAGTCCAGTTTCTCAAAAGAAAAAGAGAAGCTGAAATCTGCAAATAAAGGTGAGGTTTTGGTTTCTTCCAAGGTGACTGTGTCTGACCTATCAGTGGATCCTCCATCAATTTCAGCACCTATTCTAGTGAATAGCGCTAGGAATGTGGTGGACTCTGAGAAGGGTATACCTGCGCAATTGCCGAATGATGGGGCAAATATTCCATCTCCAAAAGTGGATGGAAATGGTGCCACAACTGGTAATTTTGGTAACCCAGAAAATCCTGATAGGATTAGGCTTGACCCAGCTGCTGTGATGGTACAGGCTGCTTTCAGAGGTTATCTGGCTCGCAGGGCATTTCGA…
GH_D13G0744	GH_D13G0744.1	GhiIQD96	ATGGGGAAATCTCCAGCGAAATGGATCAAGACCTTGCTTCTTGGGAAGAAATCTTCAAAGTCCAGTTTCTCAAAAGGAAAAGATAAGCTGGTAAGGAAGTATTAATTATCTTCAAATGTTAAATAGCACTTGAAGATTGAAAATGTTGCATTTTCTAATTTTTGTTGATTATCATGGGCAGAATTCTGCAAATAAAGGTGAGGTTTTGGTTTCTTCCAAGGTAACTGTGTCTGACCTATCAGCGGATTCTCCATCGATTTCAGCACCTATTCTAGTGAGCCGTGCTAGGAATGTGATGGACTCTGAGAAGGGTATACCTGCCCAATTGCCGATTGATGGGGAAAATATTCCATCTCTAAAAGTGGATGGAAATAATGCCACAACCGGTAATTTTGGTAA…	GhiIQD96	MGKSPAKWIKTLLLGKKSSKSSFSKGKDKLNSANKGEVLVSSKVTVSDLSADSPSISAPILVSRARNVMDSEKGIPAQLPIDGENIPSLKVDGNNATTGNFGNPENPDRIRLDPAAVTVQAAFRGYLARREFRILKGIIRLQAVIRGHLVRRQAVATLCCTWGIVKLQALARGQKVRCSDIAMEIQEKHLRLLQGLKSSNSVGASISSTVKNLSSNVFVQKLLASSPSVLPLQLQYVPEEPNSSWQWLQRWTRSQFWEYPSKPIRSGKTKLSVQKLSFAKAVNGSSHSTLEYEKNKRGLRRISVNSAADSVREHPQNELERVKRNLRKLSNSSKEVTDKSEFVNEKTKKTLKKYSSSNGPDVLEQESAEKIRDVTATLSELSMLEADLKFSSEHASLGE…	GhiIQD96	ATGGGGAAATCTCCAGCGAAATGGATCAAGACCTTGCTTCTTGGGAAGAAATCTTCAAAGTCCAGTTTCTCAAAAGGAAAAGATAAGCTGAATTCTGCAAATAAAGGTGAGGTTTTGGTTTCTTCCAAGGTAACTGTGTCTGACCTATCAGCGGATTCTCCATCGATTTCAGCACCTATTCTAGTGAGCCGTGCTAGGAATGTGATGGACTCTGAGAAGGGTATACCTGCCCAATTGCCGATTGATGGGGAAAATATTCCATCTCTAAAAGTGGATGGAAATAATGCCACAACCGGTAATTTTGGTAACCCAGAAAATCCTGATAGGATTAGGCTTGACCCAGCTGCTGTGACAGTACAGGCTGCTTTCAGAGGTTATCTGGCTCGCCGGGAATTTCGA…
GH_D13G1022	GH_D13G1022.1	GhiIQD97	ATGGGGAAGAAAGGAAAATGGTTGTCTTCTCTAAAGAAAGCCTTCACCCCAGAATCCAAGGAAAAGAAAACCCAGGTCTGAAAGAAGTCCAATTCAGCTATAAATTACCCACAGTTTATTAGTCCTCAATGAGTGTTTTTAATTTTCTTTATTGCTATGTTTTTTTTTTCAGAAATCCAAAGAACAGGTTTTGGGAAAGCAAGTGGATTTGGGTTCCAATGATTCTGATGCAGCCACTTTAGAAACTCTCAACTTGTCCCCTCCTCCCCAGCCACAGAAGGTGAAATTAATCGAAGCCGAGGCTGAACCGAGCGAGCAAACTTACCCTGTGGAAGTTGCTATTGCTGCTGCTGCTGCTGTGGCTTTGGCCGCTCCAGCTGAGGCAGTTGCGGATGTCGT…	GhiIQD97	MGKKGKWLSSLKKAFTPESKEKKTQKSKEQVLGKQVDLGSNDSDAATLETLNLSPPPQPQKVKLIEAEAEPSEQTYPVEVAIAAAAAVALAAPAEAVADVVRRQSNTGPRFAGKSNEEVAAIKIQTAFRVYLAKRALHALRGLVRLKSMMEGPMVKRQAAGALRCMQTISRVQCQIRLRRIRMTEENQALQRQLLQKHAKEIVNLQMGEDWDDSLQSKEQIEASLLSKHEASMRREKAMAYSFTHQQTWKNASRSMNPLFMDPNNPSWGWSWLERWMAAWPWEGRGMAEKEQNNDQSSVKSGRSSFGGDISKAYARYQLNLDKQSLKASQKPSRTSSLQSPSTPKPVSTLTRKLKSPSPRSSVVAPDDDMRSTVSVLSERNRRHTIGGSSVLDDESLAS…	GhiIQD97	ATGGGGAAGAAAGGAAAATGGTTGTCTTCTCTAAAGAAAGCCTTCACCCCAGAATCCAAGGAAAAGAAAACCCAGAAATCCAAAGAACAGGTTTTGGGAAAGCAAGTGGATTTGGGTTCCAATGATTCTGATGCAGCCACTTTAGAAACTCTCAACTTGTCCCCTCCTCCCCAGCCACAGAAGGTGAAATTAATCGAAGCCGAGGCTGAACCGAGCGAGCAAACTTACCCTGTGGAAGTTGCTATTGCTGCTGCTGCTGCTGTGGCTTTGGCCGCTCCAGCTGAGGCAGTTGCGGATGTCGTTCGTCGTCAATCCAACACAGGTCCTCGGTTTGCTGGAAAATCTAATGAAGAAGTGGCAGCTATCAAAATTCAAACCGCTTTCCGAGTTTACCTTGCA…
GH_D13G1947	GH_D13G1947.1	GhiIQD98	ATGGGAAAGGCAAGCAAATGGTTAGTAAACTTCTTGCTAGGGAGAAAAGACGATAAAGGAAAAAGGAAGAATTTGTCCATATCTTTTGATGAAGAGAATTTGGTTTCATCCCCGTCTGCAACTCCATCGTCCGCATCTTCGTTTAAGCGGAGATGGAGTTTTGGGAAGTTGTCGAGTAAAGATCGAGCTCATAAGAGTTCCCGGTCACTTGACTCAATGACTGCAACTCCACTTTTGAAGCAAGCTGTATTCAATATGGAGATCCGGCATGATAACACGAGGGTTTTTACAATGGCCATGATGAATTCTAGCAGAAGGAAAACAAAAGCAAGATACGCAGCAGTGGAAAATGCGGCAGCGACCCAGATTCAAGCCGCTTTTCGTTCGTATTTGGTAATG…	GhiIQD98	MGKASKWLVNFLLGRKDDKGKRKNLSISFDEENLVSSPSATPSSASSFKRRWSFGKLSSKDRAHKSSRSLDSMTATPLLKQAVFNMEIRHDNTRVFTMAMMNSSRRKTKARYAAVENAAATQIQAAFRSYLARKALHALRGLVKLQALVRGYLVRKQTTATLRSMHALMSIQVRARFQRIQMADQSQLDVKSQSLRYGRFLQEMEFKRSQREGINEKHGPVKSQNGLMNHSQMERIEQGIIKYYSGELPILKRQQKHEEFSFTTHNSPRHSPPMSKVTPARSSFSSHDYPYMPSYMANTQSSRAKLRSQSEPRQRPALNFKAKGKRITSAEEMDDDILPRYSFSQSKGVADEHQDPWIVKLYQSTITPKMDTSSYK	GhiIQD98	ATGGGAAAGGCAAGCAAATGGTTAGTAAACTTCTTGCTAGGGAGAAAAGACGATAAAGGAAAAAGGAAGAATTTGTCCATATCTTTTGATGAAGAGAATTTGGTTTCATCCCCGTCTGCAACTCCATCGTCCGCATCTTCGTTTAAGCGGAGATGGAGTTTTGGGAAGTTGTCGAGTAAAGATCGAGCTCATAAGAGTTCCCGGTCACTTGACTCAATGACTGCAACTCCACTTTTGAAGCAAGCTGTATTCAATATGGAGATCCGGCATGATAACACGAGGGTTTTTACAATGGCCATGATGAATTCTAGCAGAAGGAAAACAAAAGCAAGATACGCAGCAGTGGAAAATGCGGCAGCGACCCAGATTCAAGCCGCTTTTCGTTCGTATTTGGCAAGG…
GH_D13G2149	GH_D13G2149.1	GhiIQD99	ATGGGTTCTTCAGGGAAATGGGTGAAATCTCTTATGGGTGTCAAGAAGAATGAAAAAGAAGACCAAGTAAGCTTCGGGTTTTTTCCTGCTTTGTTGCACAGCTACTATTATTTACATTTCTTCACTAAAGCTTTTTGTTATGCAGGAAAAAATGGGTGTCAAGAGTAAGAAATGGAAGCCATGGGGCTCTAAAGGGAAGTTCAGATCAGATTCTTCACCAAGGACTGCTGCAATGGCAGCACTAGCCCGAGCTCCTGCTAAAGATTTCAGGGTTTTAAGGCAAGAAGGGGCTGCCATCCGCATCCAAACTGCTTTTCGTGGTTTCTTGGTAAATTGCAAACACCCTTTTCAGTCTCATATTTTTTTCATTTCTTTCATTGTTTGGTGTCCGTGAAAATG…	GhiIQD99	MGSSGKWVKSLMGVKKNEKEDQEKMGVKSKKWKPWGSKGKFRSDSSPRTAAMAALARAPAKDFRVLRQEGAAIRIQTAFRGFLARRALRALKGIVRLQALVRGRQVRKQATITLRCMQALIRVQARVRARRVRMSTEGRAVQKMLDECHSKDDILKQAEDGWCDSKGTLEDVKTKLQMKQEGTFKRERALAYSLAQKQWRSKPSSTNQTNSSGLYTKYQEFDENSWGWSWLERWMAARPWETRLMEPSQAPPSKHCLEGKNARSSSPCFVEVGKNNISTRISAKPPCIGQVTHSSSSPSSEFRFNPSSASSSICRSSTPVSGNTTLSSTDRTEQSGNSRPDYMNLTESTKAKQRPRNNPVHMSRPLYPNTNAGNRYV	GhiIQD99	ATGGGTTCTTCAGGGAAATGGGTGAAATCTCTTATGGGTGTCAAGAAGAATGAAAAAGAAGACCAAGAAAAAATGGGTGTCAAGAGTAAGAAATGGAAGCCATGGGGCTCTAAAGGGAAGTTCAGATCAGATTCTTCACCAAGGACTGCTGCAATGGCAGCACTAGCCCGAGCTCCTGCTAAAGATTTCAGGGTTTTAAGGCAAGAAGGGGCTGCCATCCGCATCCAAACTGCTTTTCGTGGTTTCTTGGCAAGAAGAGCTTTGAGAGCTTTAAAAGGAATCGTGAGGCTTCAAGCATTAGTTCGCGGCCGACAGGTGAGGAAACAGGCCACCATAACGCTTCGGTGCATGCAAGCTCTCATTCGTGTCCAAGCTCGTGTTAGAGCTCGTCGTGTGCGG…

## Sheet: Gra
Genome Wide Identification, Classification and Functional Characterization Analysis of IQD gene family in Diploid and Tetraploid Cotton (Gossypium) Abdul Rehman1,2,3, Zhen Peng2, Hongge Li2, Guangyong Qin1, Yinhua Jia2，Zhaoe Pan2，Shoupu He1,2, Abdul Qayyum3 and Xiongming Du1,2*, 1Zhengzhou Research Base, State Key Laboratory of Cotton Biology, Zhengzhou University, Zhengzhou 450000, China. 2State…
Gene ID	Principle Transcript ID	Rename	Genomic	Rename	Proteins	Rename	CDS
Gorai.001G009300	Gorai.001G009300.1	GraIQD01	TTTTTCTTGTTTCCCAAATTTTCTTCTTCACAAATAATTGACCTTTCTTCTAAAATCATTACTTATAAAGTATAGTAATGTTATTCTTCAACAACTTGCCATCACCCTTTTTAACAACATGGAAAAGCAGCTAAAATTGTGAGCTGAGGCTGTATTCAGTTCACCATTTCTACTTCCCAAAGCTATCGTATAAAAATGGGCCACTTTTAGATTTCACTTTTAAAAGAACCCCCTTTCTTTCACTTGTTTTGCATTTAAGTAATGGGAAAAGCTACAAGGTGGCTAAAGAGCTTATTTGGGATAAAGAACACCAAAGAATGCCCAAGTTCCGGTGACCGGAAAGATAAGAAACGGTGTAGCATTGGCCATTCAGGGCGGGAATCAAGCGGCGGATTATGT…	GraIQD01	MGKATRWLKSLFGIKNTKECPSSGDRKDKKRCSIGHSGRESSGGLCHNPTTIPPNISPAEVVWLRSFYNETEKEQNKHAIAVAAATAAAADAAVAAAQAAVAVVRLTSHGRGTMFGGGGHGKWAAIKIQSVFRGYLAKKALRALKGLVKIQALVRGYLVRKQASATLHGMQALIRAQATIRSQKARKSMEKFDDTRSERTVSFHSRRLSASLDTLNIEESPKIVEIDTGRPKSRSRRTNTSVSDFGDDPSFQILSSSVPARLPARLSVPDSHTDWGLTGDECRFSTAQSTPRFINCCVSNAPVTPAKSVCADNFFRHYGIGNLNFPNYMANTQSFKAKLRSHSAPKQRPEPGPKKRLPLVETTESRSSLSGVRMQRSCSQAQEAISFKNVVMGKLDRYS…	GraIQD01	ATGGGAAAAGCTACAAGGTGGCTAAAGAGCTTATTTGGGATAAAGAACACCAAAGAATGCCCAAGTTCCGGTGACCGGAAAGATAAGAAACGGTGTAGCATTGGCCATTCAGGGCGGGAATCAAGCGGCGGATTATGTCACAACCCTACAACGATACCACCAAATATATCACCGGCAGAGGTGGTTTGGCTGAGATCATTCTACAATGAAACGGAGAAAGAGCAGAATAAGCACGCAATTGCGGTGGCAGCTGCCACGGCTGCTGCTGCAGATGCCGCTGTCGCCGCCGCTCAGGCAGCTGTGGCGGTGGTGAGGCTTACGAGTCATGGAAGAGGTACCATGTTCGGCGGTGGTGGACATGGAAAGTGGGCTGCCATTAAGATTCAATCCGTTTTCAGA…
Gorai.001G022300	Gorai.001G022300.1	GraIQD02	CCTACTTGTGTAAACTAATGATATTATAAAACTAGGGTTAGATTTCAAATTGAGCATAGTAGAAGGATAAAAACTAGAATTTGACCTTTATTTTCAGTTTTCTACTCACCATTTTGGGTTCTTAGTGGTTTTCAAAATTTTAACTCGAATATGTTTCCTTTTTCTTAAAAGAAAGGGATTTTTTTTTCTCTTTGAGTCTAGTTGAAGACTTAAGGATCCCCCCCCCTCCACCTTTTTTTTTTGTGCAAAAAGATTTCCTTTTTGTCACTCATACTCTGTTATCAATTGTTTCCATCGTTGCCCATTTCCTTTTTCTTTTCTTAAATAACAGTTGTTTGTATCTCTGGGAAAAATATATACTTTGAAACTACCATGGGTGCTTCAGCGAAATGGGTGAAA…	GraIQD02	MGASAKWVKSLIGLKKTVKDDQEKMSGKSKKWKLWRSSSGDGIGSSWKGFKGKFKADYEGSDSSPRSEAFSAAMAAVVRAPPKDFRVVRQEWAAIRIQTAFRGFLARRALRALKGIVRIQAFVRGRQVRKQAAVTLRCMQALVRVQARVRARRVRMSIEGQAVQKILDEHRSKAELLKQAEEGWCDSKGTLDDVKIKLQLRQEGAFKRERALAYSLAQKQWRLNMDSNTRTNSSVSVPYLKNQVFDKNSWGWSWLERWMAARPWETRLMEQSQADPSEPTPPSKTCSESRKTTRPTEPCSVKVRKNNVTTRISAKPPHIGQGTRSSSSPSSEFRFEESSASSSICTSTTPVSWNTMPTSERTEKTGNSRPNYMNLTESTKAKQRAANHALRRIQMQSMD…	GraIQD02	ATGGGTGCTTCAGCGAAATGGGTGAAATCTCTTATTGGTCTCAAGAAAACTGTAAAAGATGACCAAGAAAAGATGAGTGGCAAGAGCAAGAAATGGAAGCTATGGAGGAGTTCTTCAGGGGATGGAATAGGTTCCTCATGGAAGGGTTTTAAAGGAAAGTTTAAAGCAGATTACGAAGGATCTGATTCTTCACCAAGGTCTGAAGCTTTCTCTGCTGCCATGGCTGCTGTGGTTCGAGCTCCTCCTAAAGATTTCAGGGTTGTAAGGCAAGAATGGGCTGCTATCCGCATTCAAACTGCTTTCCGAGGCTTCTTGGCAAGAAGGGCTTTAAGGGCTTTAAAGGGAATCGTGAGGATCCAAGCCTTTGTTCGCGGTCGACAGGTGAGGAAACAGGCTGCT…
Gorai.001G072400	Gorai.001G072400.1	GraIQD03	CACTTGTTCCCGACGTAACAGCACTTTGGGGCACCCCCAAACAACCACTGCCTCCCACAATCATTCCCTATTCCAACGTCCACATCTCCTCTCAATCCCAGCCGTCAAATTTCCACTGTCCGTCGCAATCTCAAATTTAGAATCCTTTACTAGTTAAGATCATCCTACTAAAAACCCATTACACTAAATTCGATTACACCGGATTAGATACCGTTGCTTTGATTCATAATTTCCAAATTTCTCACAGAGCAACAAAAGCAGAGAAAAAGGGAAAATCTCAGTTAGTTCATTTTTAAATTCAAATAAATAAATATTCTTCTTGATTTGCTTACAAGCCTACTCTCTCAGTCTCTCTCTTGTAGCTGCTTTCTTGTGGTACGTTTTGCTTTCTATTTTTTT…	GraIQD03	MGKSPGKWIKTVLFGKKPSKSSYPKGREKVANDSQVLVAARASESDLAVAPPFSSQLNPHTTERDERRLELENKETANISHDDETSLPMSQDIDSQKFTLQDSPSNPERIKQEQSATLVQAAFRGYLARRAFWALKGIIRLQALIRGHLVRRQAISTLCCMMGIVKLQARVRGQMVRHSDCVHELQKKCNQINLLESKLVVSLGFNMPSHIGKLSAHAFVRKLIASSPTVMPLRLRYDVGEPNSVWIWLERWSASCFWKPVPQPKKTSNTKFEKKRVNGQTVEMDTGRAKRSVRRIPPANMDTSVQATSEFDKPKCNPRKISGHPAEPVQENPQNELEKVKRNLRKVHNPVVEHSLQSEFEFEKLKSLEKVSSTPDLDMVEESLNRSAEKTSKEAAMAA…	GraIQD03	ATGGGAAAATCTCCCGGAAAATGGATTAAGACTGTGCTTTTTGGAAAGAAACCTTCCAAATCTAGTTATCCTAAAGGAAGGGAGAAGGTTGCCAATGACAGCCAGGTATTGGTTGCAGCCAGGGCATCAGAAAGTGATTTGGCTGTGGCTCCTCCCTTCTCTTCACAGCTCAATCCTCATACTACTGAGAGAGATGAAAGGAGATTAGAATTGGAGAACAAGGAAACTGCAAATATCTCACATGATGATGAGACATCACTGCCAATGAGTCAAGACATAGATTCTCAGAAGTTCACTCTTCAGGATTCACCTTCTAATCCTGAAAGGATAAAGCAAGAACAATCGGCGACCCTGGTGCAGGCTGCTTTTAGGGGTTACCTGGCTCGCCGAGCGTTCTGG…
Gorai.001G248200	Gorai.001G248200.1	GraIQD04	AAATGATAGGTAGATGAGTAGGTTTTATTTTCCAACCAATCAAACACTGGGCAAAGAAGGGGGCCACACTACCAAAGCAGCTGTTTCATATTCTCCAAAACCTTTATTCTCAAGATCTATTTCTCTTTATCTTCCTCTCTATACTATATTATGCAGCTAAAGAAACTGTGACCCTTTCAAGTTTTTATCTTCTTCTTTCTTTTCTTTTTTTCTTTTTTGTACTTTGGAAAGATGACCCTTCGAGTTCTTTGAGATCTGGGCATTATTATAATCTCAGGTAGTTTTTGCTACTTTTGGTTTCTCTCTTCTTTTTTCATGGACCCCAATACGAAGATGCAATTTTTTTTTGCTTTTTTTGTTTGAATTCTCTGTGGCATGATATTGCTAATTGTCTTTCAA…	GraIQD04	MGKKGKWLSSLKKAFTPESKEKKTQKSKEQVLGKQVDLGSNDSDAATLETLNLSPPPQPQKVKLIEAEAEPSEQTYPVEVAIAAAAAVALAAPAEAVADVVRRQSNTGPRFAGKSNEEVAAIKIQTAFRVYLAKRALHALRGLVRLKSMMEGPMVKRQAAGTLRCMQTLSRVQCKIRLRRIRMTEENQALQRQLLQKHAKEIVNLQMGEDWDDSLQSKEQIEASLLSKHEASMRREKAMAYSFTHQQTWKNASRSMNPLFMDPNNLSWGWSWLERWMAAWPWEGRGMAEKEQNNDQSSVKSGRSSFGGDISKAYARYQLNLDKQSLKASQKPSRTSSLQSPSTPKPVSTPTRKVKSPSPRSSVVAPDNMRSTVSVLSERNRRHTIGGSSVLDDESLASS…	GraIQD04	ATGGGGAAGAAAGGAAAATGGTTGTCTTCTCTAAAGAAAGCCTTCACCCCAGAATCCAAGGAAAAGAAAACCCAGAAATCCAAAGAACAGGTTTTGGGAAAGCAAGTGGATTTGGGTTCCAATGATTCTGATGCAGCCACTTTAGAAACTCTCAACTTGTCCCCTCCTCCCCAGCCACAGAAGGTGAAATTAATCGAAGCCGAGGCTGAACCGAGCGAGCAAACTTACCCTGTGGAAGTTGCTATTGCTGCTGCTGCTGCTGTGGCTTTGGCCGCTCCAGCTGAGGCAGTTGCGGATGTCGTTCGTCGTCAATCCAATACAGGTCCTCGGTTTGCTGGAAAATCTAATGAAGAAGTGGCAGCTATCAAAATTCAAACCGCTTTCCGAGTTTACCTTGCA…
Gorai.002G064600	Gorai.002G064600.1	GraIQD05	GCTATTTATGCTTTTCTTGCATTGTACTAAAAGATAATATTTCATCAAACACCTCCACCCCACAAATCTTTGCCAACTCCAATTTTTGTCCCCCTTCTTCCTCGTCTGTTTGCTTCCATAATCTATTTATTTGTATTTTCATGCTGCAAACACTACTTTTCAGTCCTTAATAAATTGCTTCAAATGACATCTGCTTGGTTTATTTGCTTCAATTGATTCACTCATTTCGAGCTCTGTAAATATTGGTAAGCTTCATGATTGTTCAACTTATATTTTGATATATCTCTAATCACCCTGGAATGATATTTCTATGTGCCTGCAGGTTTATTATAAGCATCTTGGTGATCATCCATGGGTTCAGGAAACTGGCTTAGATCATTCATTTGTTTAAAGAAACAT…	GraIQD05	MGSGNWLRSFICLKKHKPNRSKQAKTPSIQVHSSNEKSNGDERVEEHEGPEVAAAGSSQSSPGIAVEQRAAAKIQKAFRSYRARKAVRRLRDAGRFKNILIQGHTVKKQTTSTLSYLHSWCNVQSQIRARRICMVTEGRLKQKKMENQMKLEAKLHELEVEWCGGSETMEEILSRIQQREEAAVKRERAMAYAFSHQWRANASQYLGQASYGAGKENWGWSWIERWIAARPWEVRIHSQPIHPKKTHGRQASKSEKEMKVLASVKPCLPNGKVAPKAKNGAPSDG	GraIQD05	ATGGGTTCAGGAAACTGGCTTAGATCATTCATTTGTTTAAAGAAACATAAACCAAACAGATCCAAACAAGCAAAGACCCCATCAATACAGGTACACTCGAGTAATGAAAAATCAAATGGTGATGAAAGGGTAGAAGAACATGAGGGTCCTGAAGTGGCAGCGGCTGGGAGTTCACAAAGCAGTCCTGGAATTGCCGTTGAACAAAGAGCGGCTGCTAAAATTCAGAAGGCATTTCGGTCTTACAGGGCAAGAAAAGCAGTCCGCCGGCTGAGAGATGCGGGGAGATTCAAGAACATATTGATACAGGGACATACAGTGAAGAAACAAACAACAAGCACGCTAAGCTATTTACATTCATGGTGCAATGTCCAGTCTCAAATCCGAGCTCGGAGAATATGT…
Gorai.002G124800	Gorai.002G124800.1	GraIQD06	GTTCTGACAGCTTTCTTCTTATTCGCTTCTCTCAAACGAACGTAACAGGAACAGTAACAGAATCATGATAAGTGGCGGATTCCAACATAAAAAGTAAATAGATTTTAAGGACTGTGTTTGAGGTCCGTGTTTTACGTTTTTTAACCTTCGCTGCAATTTCCAATACCCAATCCACACACCAAAATATTAGACTGTCGTGTCCCTCACACACTCGCTAGAGTTAAAAAGACTTACGAGAGTGAAGGATAGAAGAAGAAAGAAAAGGGAAAGTCAATTGAAATTTTTTTTTTAAATGGGAAAATCCACTTCCTGTTTCAAACTCATCACTTGCGGCAGCGATTCCGCTGAAAAAGACGACGCCATTGATGCCCCTGAGGTAAATAACGGCTGCATTTCCCC…	GraIQD06	MGKSTSCFKLITCGSDSAEKDDAIDAPENKRSSDKKGWSFRKRSERHRVLSNSVIQVTTTTGLKESQDSVGFEFQQQDVSVASEKTSTVQYTEEKPQLMTPKEYIEEKSQLLALKEYTEEKSHSLTPIELAEEKSQLLAPIKCTEEKSQLTPEPEESKVPEPITATTNEAEDDFSLDESVVVIIQTAIRGFLAQKELGKLKNLVKLQAAVRGHLVRRHAVGTLRCVQAIVKMQLLVRARQSQEGSYVEKLDGKHQGVNQRLQGNSATKKNLTYNSMEKLLSNRFAHQLMDSTPKTKTIHFKCDSSKPNSAWSWLERWMSVSSSEKASKAELPIEQPEQKKTEDCDSPRTPAVPSENISASNEPKPQVRETMVSSESEDNLITYDAANFKFEACQPSSLS…	GraIQD06	ATGGGAAAATCCACTTCCTGTTTCAAACTCATCACTTGCGGCAGCGATTCCGCTGAAAAAGACGACGCCATTGATGCCCCTGAGAATAAGAGATCAAGTGACAAAAAGGGATGGAGTTTTCGGAAGAGATCTGAACGGCATCGAGTGCTTAGCAACTCTGTGATACAAGTAACTACCACTACAGGACTTAAGGAAAGTCAAGACTCTGTTGGCTTTGAGTTTCAACAGCAAGATGTCTCGGTTGCTTCTGAGAAAACCTCCACTGTTCAGTACACTGAAGAGAAACCTCAGCTGATGACACCAAAAGAGTACATTGAAGAAAAATCCCAGTTGCTGGCACTAAAAGAGTACACAGAAGAAAAATCTCACTCGCTGACGCCTATAGAACTTGCTGAAGAA…
Gorai.002G249700	Gorai.002G249700.1	GraIQD07	GGAATAGGCAAATCTTTTCAATTAAAAGTGGCCCAATTTGACCAACCCAATAAAGTGGGGGGTTTCACTTAAAAAACAGCTGTTTCTTCTTCAATTTGTCTGAAAAACAGAACCTTTCCTCCTTCTCAAGATCTGTTTTTGTTCTTTCTCTGTAACTGTTTACCGACATACAAAAGAAAGTTCATTCTTTCGAACTTCTTGAGATCTGGGCATTACAATTTCAGGTACTCTCTCTTTCAAAATCTGGGTACATTCCCAATTTTGTTAAAACTTTAAATAGCAGGGGTTTTTTTTTTTGTTCTGTTTGGTTGATGAGAAAATTTGGAAAAAAGGAGAGAAAATTTTTAGCTGAAGTAGGAAAAAAAATCACCTTTTTAGCTTGGTTTTTAATCATGTTTT…	GraIQD07	MGKKVKWLSSLKKAFNPESKEKKNQILDKQVHLGPSSSNAAAPTLETVNLSPPPQPEDEKIIKPETVAEATDDDVVVAPAVPTPAAVTVVQRRLNTDSRFAGKSMEEVAAIKIQTAFRVYMAKRALRALRGLVRLKSLMEGPAVKRQATSTLRCMQTLSRVQCQIRMRRIRMTEENQALQRQILQKHAKELVNLQMGEDWDDSLQSKEQIEASLLSKHEAAMRRERAMAYSFTHQQTWKNSSKSMNPLFMDMNNPTWGWSWLERWMAARPWEGRGVTGKEPNNDQSSVKNAHFEGEISKAYARYQLNLDNKQSPKSSQKPNRTSSHLSPSPKPPSTPSRKLKSASPSGSIIALDDDTRSIVSAQSERNRRHSIAGSSVRDDESLASSPSLPSYMVPTKS…	GraIQD07	ATGGGAAAGAAAGTAAAATGGCTATCTTCTTTAAAGAAAGCCTTCAATCCAGAGTCAAAGGAAAAGAAAAACCAGATTTTGGATAAGCAAGTGCATTTGGGTCCTAGTAGTTCTAATGCAGCTGCACCCACATTAGAAACTGTTAATTTGTCCCCTCCACCTCAGCCGGAAGATGAGAAAATAATCAAACCCGAGACGGTTGCTGAAGCTACCGATGATGATGTTGTTGTTGCTCCAGCTGTTCCGACCCCGGCTGCTGTTACGGTCGTTCAACGCCGACTTAATACAGATTCTCGGTTTGCTGGAAAATCTATGGAGGAAGTTGCAGCGATCAAAATTCAGACAGCTTTTCGAGTTTACATGGCGAAAAGAGCATTGCGTGCTTTACGAGGACTTGTG…
Gorai.003G005000	Gorai.003G005000.1	GraIQD08	TCCAACACAAATCCAAAACCCCTGAAGCTAGCTAAAGCCTAAAGGTTGGTTGGGATTGTGCTAGCCGGTGGTAGAATGCTTCAAAACTGCACACAGTGGTGGGGATGGATAAATAATATATCCATCGTGCCACGTTCTCAGTCTGACAAGCATTATTTGACAAGAAAGATCAAAACTATACTATACTCTCACAAAATATGGTGCGCACGGCACAACTCCTTCCTTTAAAAGCGACCCCTTCTTGGTCCTGCGAAGGTGAAGACATCATATCAGATCGGAAAACAGAGAAAAAAAAAAAAACCAACAGACATTGCAAAGATGGGCACTGCTAGAAACTGGTTCAACACAGTTAGAAAGAAGTTCATCAAATCATCCCACCAAAGAGATATCGTCATTCCT…	GraIQD08	MGTARNWFNTVRKKFIKSSHQRDIVIPHSENLSQQSMIKEVRDFPNISPSSRSSFQTKNLTREDIAAIKIQSVFRGHLARRAYRALRSLVKLQAVARGAYVRKQVQIAMNCMHALVRLQVKVRARQLLGRYSE	GraIQD08	ATGGGCACTGCTAGAAACTGGTTCAACACAGTTAGAAAGAAGTTCATCAAATCATCCCACCAAAGAGATATCGTCATTCCTCATAGCGAAAATCTCAGCCAGCAGTCAATGATCAAAGAAGTTAGAGACTTCCCCAATATTTCACCTTCATCGAGATCATCATTTCAGACAAAAAATTTAACCAGAGAGGATATTGCAGCAATTAAGATCCAATCAGTTTTCAGGGGTCATCTTGCAAGACGAGCATATAGAGCATTGAGAAGCCTGGTTAAGCTGCAAGCAGTGGCCCGAGGGGCGTATGTAAGGAAACAAGTACAAATAGCAATGAATTGCATGCATGCACTTGTCAGGTTACAGGTCAAGGTTCGCGCCCGCCAACTCCTGGGCAGGTACAGTGAG…
Gorai.003G061500	Gorai.003G061500.1	GraIQD09	ATAAAATAGTGTATCGCAGCTTTGAATTTTATACAAAAAAATACGCATTGCTCCACAAAGTTGGAGAGAGAAGGTGGTTTTTTATATATTGAGAAACAGGAATCGGCGCTTCTTTTGAAATTGAGAAGGTGAGAGTGAGTTTCCTCTTCCTAATCTTTATTTTATTTTAATCATATTTGTCTGAATGACTTTGTTTTTCATACTGGGTTTTATTTGAAACACATATAGTTATTGTAATCATATAAAGACACTGAACTGATATCTTCTTCTTTTTTTAATTTTGTCTTTATAACGGTAGAACTTCACGAGGTTGTGTCAGATTTTCTTTTCAAAACCAAATCCAAACCTTTATCCCTATTTATTTTAAAGCTCATGCTTTTTTGTTACTGTTCCAAAGCT…	GraIQD09	MGKTTRWLKSVLGMKKEKEKTPIQHSVLYDKNDKKRWSFAKSGKDVDANSQTPSAVTDAAWLRSYFAETEKVQNKHAVAVAAATAAAADAAMAAAQAAVAVVRLTSNARASFLAGGKEKWAAVKIQAAFRGYLSRKALRALKGLVRLQALVRGYLVRKRAAATLHSMQALIRAQSTVRSQRMRRSFNKENRYHSENQPRKSIERFDEWRSEINAYDDNPKIVEIDTLKTRSRSHRFNTALSECGDDLPYQTISSPLPRLVPPRTSLPHYQNLNDFEWCFSGGDECRFATAHNTPRFGNAGRSNAPTTPTQSVCGDGYFRPYSNFPNYMTNTQSFKAKLRSYSAPKQRPESGGAKKRLSLNEIMAARNSISGVRMNKSYYQIHHQF	GraIQD09	ATGGGGAAGACTACAAGGTGGCTCAAGTCAGTTTTAGGCATGAAAAAGGAAAAAGAAAAAACCCCCATTCAGCATTCAGTTTTATACGACAAGAATGACAAGAAAAGGTGGAGTTTTGCCAAGTCCGGGAAAGATGTCGACGCAAATTCTCAAACCCCATCGGCCGTTACTGATGCCGCTTGGCTTAGGTCCTACTTTGCCGAAACCGAGAAAGTGCAGAACAAACATGCCGTTGCTGTGGCTGCTGCTACAGCAGCTGCAGCCGATGCAGCTATGGCAGCAGCACAAGCTGCCGTCGCAGTCGTCAGGCTGACCAGCAATGCTAGAGCTTCTTTCTTGGCTGGAGGGAAGGAGAAGTGGGCAGCTGTTAAAATTCAAGCCGCCTTTAGAGGTTACTTG…
Gorai.003G162000	Gorai.003G162000.1	GraIQD10	CTTACCGTATCATAATCATAATATATACAAACCAATTTCCCTCTTCCTCTCTCCCTCCTTTCCTCAGTAAGCTTACGAAACTTCTTCTTCGCTTCTTCTCTGCAAATGAATCCCGAGAAACCTCCCAAACCCTTATCTTTTTACCCTTTTTCACCTTCTTCTCCATCACCAAACTAACGTTTCCGTACACAACGAACAAAATCAAAGCAATGGGTAAAGCTTCCAAGTGGTTCCGCAGCATCCTCGGCTTCAAAAAACCCGACCCCCATAACCAACCTTCTCCTTCTTCTTCAAAACCAACTTCCCATAAAGACAAACGGCGTTGGAGTTTCGTCAAATCGTACCGTGAAAAAGACTCCTCCACGAACAGTAGTAATGCGAAGTTGCCGTCGTCTTCGC…	GraIQD10	MGKASKWFRSILGFKKPDPHNQPSPSSSKPTSHKDKRRWSFVKSYREKDSSTNSSNAKLPSSSQQQKDSVSFVERKGDNEVTDPSKHAIAVAAATAAVAEAAVAAAQAAAAVVRLTSNSGRCARESAAVYVCNNNSYIAHDESSAIKIQSAFRGYLARRALRALKGLVRLQALVRGHIERKRTAEWLRRMQALLRAQARARAGRAQISESSQSSCKSSHFHHPDPATPEKFEHVIRSKGTKYEQSLMLKRNGSKSSGRTVDNQEKLHSGWYRRVDEQTWVHSTRIGPNDDEKNDKILEVDTGKPNFISKRRNLFHSTHLSLNSDLYSCSFTNSRDSHQTAPSPSSGEVQSLTPLMLSHSEAIQESPFCGAVDDNSPQFYSASSKGASSKRSPFTPAKSD…	GraIQD10	ATGGGTAAAGCTTCCAAGTGGTTCCGCAGCATCCTCGGCTTCAAAAAACCCGACCCCCATAACCAACCTTCTCCTTCTTCTTCAAAACCAACTTCCCATAAAGACAAACGGCGTTGGAGTTTCGTCAAATCGTACCGTGAAAAAGACTCCTCCACGAACAGTAGTAATGCGAAGTTGCCGTCGTCTTCGCAGCAACAGAAAGACTCTGTTTCCTTCGTTGAAAGGAAAGGTGACAATGAAGTAACGGATCCTAGCAAGCACGCCATCGCTGTTGCTGCCGCTACTGCCGCCGTTGCCGAAGCAGCCGTTGCGGCTGCTCAAGCTGCCGCTGCGGTGGTTAGGCTCACTAGTAACAGTGGTAGGTGCGCGCGTGAATCGGCAGCGGTTTACGTTTGCAAC…
Gorai.004G114300	Gorai.004G114300.1	GraIQD11	TGGTGATGTGGCAGAATGCCATTAGGCTGAAAGCAACCATAATGAGCCCGTGAATTTGATAAATCCAACGGCCGATCGCGTGGGTCTCTTCATTTACTTCGTTCTCTACTTTCTTGCCCACTGCTTCTGCTTCCCTTCTATCATTTTTCCATATCACCTGTTTTCTCTTTTTTCTCATCTCTCCCCCCAACTCTTGTCAAATGATAGAGAGGAAACATGACAGTAAATCAAGCCAAGTGATAAAAGTTTCAGCCTGCTGTTACTGTCTCTGGTTTCTTTTGACCTTTTTTAAAAAAAAAAACTCTGTTTCTTAACTCGTTGTTCCTCTACTTTGCATTCATTCTCTGTTTTCATTGACATGGGTTTTCAACCTTGTTTTTATAATTGAACTTTTCCTTT…	GraIQD11	MGKKGSGWFSTVKKVFKSSSKDLPEKKKESVEKWPNEAPEVVSFEHFPAESSPDITKDESETSTPNKDSDHAIAVALATAAAAEAAVAAAQAAAKVVRLAGYGRHSMEERAATLIQSYYRGYLARRALRALKGLVRLQALVRGYNVRKQAQNTMRCMQALVRVQARVRARRLQLTQEKLQKRVDDDEDDNEEEKRGIEELKLERKPKSPLNKYDSWDGENVNGCASKKHDAVMRRERALAYAYSYQEEQRQHHEQLLVQPQHNGKDVGVYLNEREKAQWGWNWLECWMSPQPYPARQLGLQEGAYLALPRATTTTDNMLEKTVEMDVVTPIKSGSYLTQQQLQSDSSSVPSYMVTTQSVKAKGRSQGSAKQQRGAYVPEWNSSTKKASGCDSSSSGGGP…	GraIQD11	ATGGGAAAGAAAGGGAGTGGATGGTTCTCCACGGTGAAGAAAGTGTTCAAGTCTTCATCTAAGGACTTGCCCGAGAAAAAGAAAGAGAGTGTTGAGAAATGGCCGAATGAGGCCCCGGAAGTAGTGTCATTTGAACATTTTCCGGCAGAGAGTTCACCAGACATCACTAAAGATGAGAGTGAAACGTCAACTCCGAACAAAGATAGTGACCACGCCATTGCTGTGGCCTTGGCAACCGCTGCTGCTGCAGAAGCTGCTGTTGCTGCTGCTCAAGCAGCGGCTAAAGTTGTTCGATTGGCTGGTTATGGACGCCACTCTATGGAAGAAAGAGCTGCAACTCTTATACAGTCGTATTACAGAGGCTACCTGGCTCGGAGAGCTTTGCGAGCTTTGAAGGGA…
Gorai.004G121000	Gorai.004G121000.1	GraIQD12	TATCGTTTGGGTGTTGTGAGTTGTGGTTCGTTTCATTGAGTACAAAATCCCAAGTTTCTCCGGCTCTTCCCTTTTAACTCCTTTCTGTTCCTCTCGTTCTTTTTCACCCACAAAAGAAAAATATGCTTATACTACAATTAACCATGCCTTCAAGTGCTCGTCTAGTTCACAGGCAATGAATCATGGGCCTTTTCCGGCGACTCTTTGGCGCCAAGAAGCCTGCCCAACCACGCCCCGACAAAGACAGGAGGCGTTGGAGCTTTACCAGATCTTCCCATCCCACGTCTTCGACTTCTCATCTTGATGCCCTTTCTGGTCCATGCAATGGCACATTGGATGCCAACAAGCGCGCCATAGCAGTAGCAGCCGCCACTGCTGCTGTAGCTGAGGCTGCTCTGG…	GraIQD12	MGLFRRLFGAKKPAQPRPDKDRRRWSFTRSSHPTSSTSHLDALSGPCNGTLDANKRAIAVAAATAAVAEAALAAAHAAAEVVRLTSGGVGSADGSNRRLPQELAAVKIQSAFRGYLARRALRALKALVKLQALVRGHIVRKQTADMLRRMQTLVRLQARARASRSYMTKSFYSTCKISHSRHAVHAHSLKDECQLHVCSTKYDGSSILKRCGSNSNLMDTINLEKARMGSNWLDNWMEESLRNNHRDSPLIHRHADDAKSDKILEVDTWKPNLNCPPCNRNFRTSQHGSAFDYNQSYMAYGSPRKQSGKGSNQIPDNFSAEVLPLSSLKHPGRKDKAILRTADIDNSPQVLSASSSRPGSSARRSPFAKSECSWGYLSGFSGHPNYMANTESFRAKYRS…	GraIQD12	ATGGGCCTTTTCCGGCGACTCTTTGGCGCCAAGAAGCCTGCCCAACCACGCCCCGACAAAGACAGGAGGCGTTGGAGCTTTACCAGATCTTCCCATCCCACGTCTTCGACTTCTCATCTTGATGCCCTTTCTGGTCCATGCAATGGCACATTGGATGCCAACAAGCGCGCCATAGCAGTAGCAGCCGCCACTGCTGCTGTAGCTGAGGCTGCTCTGGCTGCAGCGCATGCGGCGGCTGAGGTTGTTAGACTGACAAGTGGTGGTGTTGGCAGCGCCGATGGGAGCAACCGACGCCTCCCACAAGAACTAGCGGCTGTTAAGATACAGTCCGCTTTTCGAGGTTATCTGGCACGGAGGGCACTGAGGGCTTTGAAAGCATTGGTGAAGCTTCAAGCACTG…
Gorai.004G124400	Gorai.004G124400.1	GraIQD13	ACAAGCAAACACCATATCTTTTAGCATTTATTCACTGCACACATCAACTTTATAAAGCTTAATAATAATATAATGCAGTGACTGTTCCGACAATTCCCAAATGCAACGACTAGCTAACCTTGCTATCAACCCCTACTGTCCTTGCCTTCCCTTTCCCTTTCATTTATATCTAAGCCTTTTGCATTTAAACATGCCAACCACTCCCCTTTGGTGAAGCTCCTATGAAGCTATGAATTAAAAGCACCATTTCTCATTTAGCTTTGTTTTTTGTGTCAACTCTTCTATGGGGAAGATTGGAGGAAACTCTTGGTTGACTGCAGTCAAGAAAGCCTTTAGGTCTCCTACTAAGGAAAACGATAAGCGGAGCTGTAGAAGGAGAGAAGATGGTGAACAAGAGGA…	GraIQD13	MGKIGGNSWLTAVKKAFRSPTKENDKRSCRRREDGEQEEEEKKRGKRRWIFKKPPYQETVIQHSEASTIVTIANAKVATNSETSALNTVPEAEQRSHAIAVAIATTAAAQAAVATAQAAVEVVRLTRPSVFLREHIAAIVIQTAFRGYLAKRALRALKGLVKLQALVRGHNVRKRANITLRCMEAMARVQARVRDQRKRLSVHERSMDSIFSDHRTNTLWSSYLADRKSIYSREESNYDDDWRTHWDEHPKTLKEIQAILQKTKQATMKREKALAQAFSNQIWTGDRNTVESEDEVDGKTRWVDRWTTRKQWESTGRMSSDHIDSIKTVEIDTSRPYSYSAPHSQNPNSQYHYQQRRPSSFSVASPLHKTINGLPIRSITPSPSKAKPLQIYSASPRYL…	GraIQD13	ATGGGGAAGATTGGAGGAAACTCTTGGTTGACTGCAGTCAAGAAAGCCTTTAGGTCTCCTACTAAGGAAAACGATAAGCGGAGCTGTAGAAGGAGAGAAGATGGTGAACAAGAGGAAGAAGAGAAGAAAAGAGGGAAACGAAGATGGATTTTCAAGAAGCCTCCGTATCAGGAAACAGTGATACAACACAGTGAAGCAAGCACCATAGTTACAATAGCCAATGCTAAAGTTGCCACTAATTCAGAAACCTCAGCACTGAATACCGTTCCCGAAGCTGAGCAAAGATCACATGCCATTGCGGTGGCTATTGCTACCACAGCAGCTGCTCAAGCAGCAGTAGCAACCGCACAAGCTGCTGTAGAAGTTGTTCGGCTCACCAGGCCTTCCGTTTTCTTGAGA…
Gorai.004G208400	Gorai.004G208400.1	GraIQD14	ACTAAAATTAAAATTTGATATAATCCAAAACCATTCCTCTCTCCATTTCCATTCCTTCTCACTGCCAACACCCATTTCTTCTTTCTTTTTTCCATTTTGTTTTCTGCATTAAACTTAGTGTAAAAGAACAAAACTGTAAACCAAAATGGACAAAGCCTCCAAGTGGTTCCGCAGTATCCTCGGTCTCAAAAGAAGAGATTCCCACAAACAACCACCTTCTTCCAAACGTCGTTGGAGTTTCGTTAAATCCTACCGCGAGAAGGACTCCTCCGCCGTCTCTACTGCCACGTCGTCGCTTCGCGGTCTTCAGCAACCACTCGAAGATTCTGTTTCTGTTGTTGACGCGAATAGTGGGTATGATGCAGTGGATGATAATAATGACCACGCCATTGCTGTGGC…	GraIQD14	MDKASKWFRSILGLKRRDSHKQPPSSKRRWSFVKSYREKDSSAVSTATSSLRGLQQPLEDSVSVVDANSGYDAVDDNNDHAIAVAAATAAVAEAAVAAAQAAAVVVELTGSNGRCARDPVAHISNSYGAGEELAAVKIQSTFRGYLARRALRALKGLVKLQALVRGHIERKKTAEWLRRMQAFLQTQPRAGQTQISESSRVSSKSSHYLHPGPPTPENFEHAVQLKSTKSEQSSMLKRNGSRLSGRTCDNYEQIHPGWYTSDHWIDVRSWDQRGHSTRIGHMVDEKNDKILEVDIGKPRFTSKLRNLFRSTHLALNSDLYSCSFTNSRDSHQTAPTPLFEAQSLNPLTFPHEVEESPFCTVDNSPNFHSASSKGGSSMRSPFTPAKSDGSRSYLSGYSD…	GraIQD14	ATGGACAAAGCCTCCAAGTGGTTCCGCAGTATCCTCGGTCTCAAAAGAAGAGATTCCCACAAACAACCACCTTCTTCCAAACGTCGTTGGAGTTTCGTTAAATCCTACCGCGAGAAGGACTCCTCCGCCGTCTCTACTGCCACGTCGTCGCTTCGCGGTCTTCAGCAACCACTCGAAGATTCTGTTTCTGTTGTTGACGCGAATAGTGGGTATGATGCAGTGGATGATAATAATGACCACGCCATTGCTGTGGCTGCCGCCACTGCCGCGGTTGCCGAAGCAGCCGTTGCGGCTGCTCAAGCTGCCGCTGTGGTGGTTGAGCTCACCGGAAGCAATGGTAGGTGCGCCCGTGATCCAGTGGCTCACATTAGCAACAGCTACGGGGCAGGCGAGGAATTA…
Gorai.004G282000	Gorai.004G282000.1	GraIQD15	ATTTTTTATATTTATTTTATTATATAAAAAAAATAAAATCTGAACATATATTATTAGTATCCGAAGACTAGTTCTTTTTCACAAGCACCTAAGATTGGGATCTCCAACACCCTTTTTTTGCTACTTTCTCATCAAAATTGCCATTTTTAGGTTTCACTTTACAAACCTTTCTCAGTTTCCGTTTCCATTTCTTGAACTCAGTGCACTGAGAAAAGTATAATGGGAAAAGCTACGAGGTGGTTGAAGAGCTTATTTGGGATAAAGAACAGCAAAGACTACTTGAATTCCGGTGACCGGAAAGGCAAAAAAGGGTCTAGAATTGCCCGTTCAGGGAGGGATCCCAGCGGCGGATTGTGTCACAGCGTTACAGCGACACCACCACCAAACATGTCACCGGCA…	GraIQD15	MGKATRWLKSLFGIKNSKDYLNSGDRKGKKGSRIARSGRDPSGGLCHSVTATPPPNMSPAEVSMWIRSYYNETEKEQNKHAIAVAAATAAAADAAVAAAKAAVAVVRLTSHGRGTMSGHERWAAVKIQTAFRGYLARKALRALKGLVKIQALVRGYLVRKQATIRSHKANRFDIPARKSMQRLYSFNHTTNGIDENSKIVEVVDIDRPKSRSRRNVNASESDLNDEYQPVHRTLSSPFLSRVPARISIPDGRDWGLTGDEYRFCTAQNTPRVISSCGSNSNASVAPPPKSVCSDNWFRHYGNYPNYMANTQSFKAKLRSQSAPKQRPELGPKKRLSLDEMVESRCSLSGVRMQRWCSQV	GraIQD15	ATGGGAAAAGCTACGAGGTGGTTGAAGAGCTTATTTGGGATAAAGAACAGCAAAGACTACTTGAATTCCGGTGACCGGAAAGGCAAAAAAGGGTCTAGAATTGCCCGTTCAGGGAGGGATCCCAGCGGCGGATTGTGTCACAGCGTTACAGCGACACCACCACCAAACATGTCACCGGCAGAAGTGTCTATGTGGATAAGGTCATACTACAATGAAACGGAGAAGGAACAAAACAAACACGCAATCGCCGTAGCGGCCGCCACGGCAGCGGCTGCCGATGCTGCGGTGGCCGCTGCGAAAGCAGCCGTGGCGGTCGTGAGGCTGACAAGTCACGGAAGGGGAACCATGTCCGGGCACGAGAGATGGGCTGCTGTTAAAATTCAAACCGCGTTTCGAGGT…
Gorai.004G286700	Gorai.004G286700.1	GraIQD16	AAACACTCAAACAGGACCTTGTAAAACCACCTTTCTCTCTTGAACTTCTTCATTATTTTTTTACACAAAAGCTTTGCCCTTCTTTTGCTTCTTTGAGATGCTTTTTTGAACTGTGTCGATGGGTGCTTCAGGGAAATGGGTAATATCTCTTATTGGTCTCAAAATAACCCAAAAACAACACCAAGTAAGCTCTGGGTTTTCTATGTTATTCCACCGTAAAAATCTTTATATACATTTTAAAGATTTAAAGCTCTTTCCTTTTTGTGTGTTTATGTAGGAGAAAGTGAATAGCAACAAGAAATGGAAGCTATGGAGAAAGTTTAGATCAGATTCTCAAAGCTCTGATTCTTTCATTGCTGCCATGGCCGCCATTGTTCGAGCTCCTTACAAAGATTTCAG…	GraIQD16	MGASGKWVISLIGLKITQKQHQEKVNSNKKWKLWRKFRSDSQSSDSFIAAMAAIVRAPYKDFSFLKQEWAAIRIQTAFRGFLARRALRALKGIVRLQALVRGRQVRKQASVTLRCMQALVRVQARVRARRVRMSIEGQTVRKMLDGHRSKDDVLKQAEDGWCGSKGTLEDVKTKLQMREKGAFKRERTLAYSLAQKQWKSVPGSTTRTDGLIPCLISQEFDKNSWGWNWLERWMVARPWETRLMELSTRTDPSKTCLESLSGKNERCSEPCSMKARKNNVTTRVSAKPPPHTRQVTGSSSSPSSEFRFDESSGSSSICTSTTPVSGTTVLPSGATGDSGNSRPNYMTMTVSTKAKQRSGNHGFQRQSMDEFEFKRSAGFDNRDSKSSKRGNCLYN	GraIQD16	ATGGGTGCTTCAGGGAAATGGGTAATATCTCTTATTGGTCTCAAAATAACCCAAAAACAACACCAAGAGAAAGTGAATAGCAACAAGAAATGGAAGCTATGGAGAAAGTTTAGATCAGATTCTCAAAGCTCTGATTCTTTCATTGCTGCCATGGCCGCCATTGTTCGAGCTCCTTACAAAGATTTCAGTTTTTTAAAGCAAGAATGGGCTGCCATTCGCATTCAAACAGCTTTTCGTGGCTTCTTGGCAAGGAGAGCATTGAGGGCTTTAAAAGGAATTGTGAGGCTACAAGCTTTGGTTCGAGGTAGACAAGTTCGGAAACAAGCCTCGGTGACGCTTCGATGCATGCAAGCTCTCGTTCGTGTTCAAGCTCGAGTCAGGGCTCGTCGTGTTCGAATG…
Gorai.005G012200	Gorai.005G012200.1	GraIQD17	AAAAAATAAAGTTGGTATAAATTTTTTTTCAAAGCCCTTCAAAAGTAGAAAAAGAAAAACAGGCTAGGAACTCGTAAGAAAATTTATTTAGAACATTAAGTATGTTGTGTAAGAAAGGTGAGGGAGGCTAGAAAAGAAGAGTGAGTTCTTTTTGTAAGGTACATATCTCTTTTTTCGGGTTCGGGTCCGGGTCGTCCTTACCTGCATTTCCATCATGTTTCATGGTTGAGAACTTGAATTCTTTGTCTTAAAAGGCTTATGATTGTGTGTTGTGTGTATACAGATCGACGGTATCGATATATTTCGGGTGCATTCGATTAGTCCCTGCAGAGTTTTCGTTCTTCGGTTTCAGTAATGCTGGCAGTATGGGAAAGAAAGGAAGTTGGTTTTCTGCAATCA…	GraIQD17	MGKKGSWFSAIKRVFVSNSKEKLNIESDKKGGKERKKKGQANYKHGEANSFIPLFREPSSIEKILGEAERDRKLSFRPSTPPDQLRTPPFLLPRAASPRVRSQRIASPRAASPKTASSPRANSPRAASPFLPPPPRAASPRAGPPRLVRPRLEPKLRNHHASATKIQAAYRGYMARRSFRALKGLVRLQGVVRGHNVKRQTITAMKYMQLLVRVQSQIQSRRIQMLENQARRQAQFKKDKEADSGFGKWTFGQSETGNENWDDSLLTKEEMEARMQRKVEAVIKRERAMAYAYSHQLWKDAMKSPHTGVPNIRSGVFPWWWNWLERRLPPTDLPENQATKTFQFTPTMPNSELKPSPRPQSSQFTFDNIIDIPTPKSTRSTILPTTRPMQTPTPPSKLV…	GraIQD17	ATGGGAAAGAAAGGAAGTTGGTTTTCTGCAATCAAAAGAGTTTTCGTATCGAATTCGAAGGAGAAGCTAAATATTGAATCGGATAAAAAGGGCGGTAAAGAAAGGAAGAAGAAAGGTCAAGCAAATTACAAGCATGGAGAAGCTAATTCCTTCATTCCCCTGTTTAGGGAACCGAGTAGTATCGAGAAAATTCTTGGGGAGGCTGAAAGAGATCGGAAACTATCGTTCCGGCCTTCAACACCACCGGATCAACTTAGAACACCACCTTTCTTGCTTCCTAGAGCTGCGTCTCCTCGTGTTCGTTCTCAAAGGATTGCCTCTCCAAGGGCTGCTTCTCCGAAGACTGCTTCTTCTCCACGAGCCAATTCACCAAGAGCTGCTTCTCCGTTTCTGCCTCCA…
Gorai.006G116900	Gorai.006G116900.1	GraIQD18	CGAAACGGCACCGTTCCTTTACCGTTTAAGTGTTTTTAACCCAATCCCACTCCCCCCACTCCCACACGACCCTTCCTCGGCGTGCTTTAGCCGATTCCGGTCCTCACAAATTCTAGAGAATATTTTTTTTCTAAAACCCCGCCTGAGAGTCCCATTTCTTCTTTATGTTGATCCCTTTTGTGAAATTTGACTTTTTCTGTAGGGAGGAAAAAATAAGAATTTTGACTGAGAGTTGACTTATTTGACTGATTGATCGATTGGTAGATCATCATCAATCGAACGGTTTAAAAAGGTACTGTTGCTTTGTTTTCAACTGTTTTTTTGGTTATCTGATGCTGATTCAGTGATTTTCCTTCTTTTTTTTGTTTCTGAACAACACTGAAAAGTTTAGTAGCTTTC…	GraIQD18	MGVSGKWIKALVGLKKTDKSQSSEKKVNRGATSKFRHRRKHSIDFDTDKLQEGLDQNAASPARDANTQAIADAAGSPSGSLEVRDAALNELVMEEWAATRIQTAFRGFLARRALRALKGLVRLQALVRGHAVRKQAAMTLRCMQALVRVQARIRARRVRLTLESETAQQKHQQQLADEARVKEIEEGWCDSIGSVEEIQAKLLKRQEAAAKRERAMAYALAHQWQAGSRQQSVPAGFEPDKSSWGWNWLERWMAVRPWENRFLDINLQDGVVACEDGSAEGKNGANSQIKPAIKKPAASNLHANLSNLKIGLSYSEGSDSPPGKSANVVDAVNALSSKPKSKPIIEDLGEEAGSKPVITSRSRSNPKERSIKSDKLVTKRLSLPNSGEGTGSQTSKTGK…	GraIQD18	ATGGGTGTCTCAGGAAAATGGATCAAAGCATTGGTTGGCTTGAAAAAAACAGACAAGTCACAATCCTCAGAGAAGAAAGTAAATAGGGGAGCTACCAGCAAATTTCGTCACCGAAGGAAGCATTCCATTGATTTTGACACAGATAAACTTCAAGAAGGGTTGGATCAGAATGCTGCTTCACCAGCCAGAGATGCTAATACTCAAGCAATTGCAGATGCTGCTGGCTCCCCCTCTGGTTCACTTGAAGTGCGTGATGCAGCTCTTAATGAACTTGTAATGGAAGAATGGGCTGCCACAAGGATACAAACAGCTTTCCGTGGGTTTCTGGCTAGAAGAGCACTCCGAGCCTTAAAAGGATTGGTCAGACTACAGGCCCTGGTGAGGGGTCATGCTGTAAGA…
Gorai.006G134500	Gorai.006G134500.1	GraIQD19	GAAAAACCAAGGCAATTTATATATATTCAAACCTTCAAATTCATTCGTAGGGTTAAAGAGCATTGACCCACTCGGATCATCATCATCATCATTCACCAAAATATAAATGGCATGCTGCTGATGGGTGTCCTTGAAATTTATTCAGCCATTTCAATGTCATGAAACAAGGAATTCAGGTCTGTTCTTGCGTCTTCTTTCTAAATGCTGATGAAATGAGGAAGTAGGATTCTTTACAGACTTTGATTCATACAAATTGTCAACTCAGCTGCAATTTTTCACAATATTGAGATATTCTATCCTTTTGTTCTCATACCATCTTTCCTAATTGATTAGAAATTTCCTATCAACTTTCAATGGGAAAGAAAAGGTGCTGGTTTAGTTGGGTGAAGAAGATATTCG…	GraIQD19	MGKKRCWFSWVKKIFASDAKPKPEKKSRRWKWIFRRLKLKQYHPALPPLQKSLCEAREEQRNHALNVAIATAAAAEAAIAAAQAAAEVVRLTAASNPSHHFTTIDRNLAALNIQTAFRAHLARKALRALKGVVKLQAIVRGRAVRRQALINRKCLQSGTNMYPKVKEKSTSPTRVICQDSRRKQSLMNKDELQDKDIKGQYACNSERSWNDSVLSKQDIEVKFLRSQEAMAKRERMKKYSYSHRERLNTRMLDELVHVKEAKAEANERDRVMISKLDVPSNLSTWEINGPPHVRHRKLKKQQDTLNGMNSPFSFPRRSFSRTQQSAAGDEGSIPNSPVFPSYMGATECAKAKARSRSTPRQRVGFWDSCFDNSGAYKGGLSLWSTFEGEPFSIEENCCL…	GraIQD19	ATGGGAAAGAAAAGGTGCTGGTTTAGTTGGGTGAAGAAGATATTCGCTTCTGATGCGAAACCAAAACCGGAAAAGAAATCAAGGAGGTGGAAATGGATTTTTAGAAGACTGAAACTAAAGCAATACCACCCTGCACTTCCCCCACTTCAAAAATCATTGTGTGAAGCAAGGGAAGAGCAAAGAAATCATGCTTTAAACGTAGCCATTGCAACAGCTGCCGCAGCGGAGGCTGCAATTGCTGCCGCCCAAGCAGCGGCTGAGGTTGTTCGTCTCACAGCTGCCTCTAACCCTTCTCATCATTTCACTACAATCGACAGAAACTTGGCTGCTCTTAATATCCAAACTGCTTTTCGGGCACACCTGGCAAGGAAAGCACTGAGGGCATTGAAGGGAGTAGTG…
Gorai.006G168400	Gorai.006G168400.1	GraIQD20	ATACTCCTCGCACCAACTTAAAGTTGTGGATTGCTTGCTTAATATGTAATATAGATTTATATAAATTTGATATGCTAGTTTCGAGTTTTCACTGATCCGCGTGTAAAATTTAGAAACAAGTGTTCATAAAACTGTGGTTCAGTTGCCAAAATTTGGGGGAGAAATGGGTGGACTTTGTTTCCAACCAAACCAATCAGGGGAGGGTGGCAATGCAGTTAGATAAGTGTGTCGCATTTTTTGCCCCAAGAACTGGGTCACACTAGCAAAAGGACCAGCTGTTTCTTCTTCATAATCTCTAAAATCCACTTGTCAACTTCTCTTTATATATTCCATTTTCTTCTCCATATCAAAAGGATGCAGTCTGCTAAGCCTATGCAGTGACAACCTTTCAAATTTCTG…	GraIQD20	MGKKGKWLSSLKKVFSPDSQEKKNQKSKQQLLEKQVHLGSSDSGAATLETVSLSPPPPEEVKPIEAESKQTYPVVVASAAASPQAAVEVVQRQLNRDALFAGKSEEEVAAIKIQTTFRVYLARRALHALKGLVRLKSLMEGPVVKRQAASTLRCMQTLSRLQCQVRIRRTRMTEENQALQRQLLQKHAKEIVNLQMGEDWDYSLQSKEQIEASLLSKHEAAMRRERAMAYSFTHQQTWKNASRSMNPLFMDPNNPSWGWSWLERWMAAQPQEGRGTTEKEQNDQSSIRSARSNFGGEISKAYARYQLNLDKQSPKAGQKPNQTSSLLSVSTPKTSASIPARKLKSASPRSSVVGPDDDGRSMVSIQSERNRRHSIAGSSVHDNEGLGSSPLLPSYMVPT…	GraIQD20	ATGGGGAAGAAAGGAAAATGGTTGTCTTCTTTGAAGAAAGTGTTCAGCCCAGATTCCCAGGAAAAAAAAAACCAGAAATCAAAACAGCAGTTGTTGGAGAAGCAGGTGCATTTGGGTTCCAGTGATTCTGGTGCAGCCACTTTAGAAACTGTCAGCTTGTCCCCTCCTCCGCCAGAAGAAGTTAAACCGATTGAAGCTGAAAGCAAGCAGACTTACCCTGTGGTAGTTGCCAGTGCTGCTGCTTCACCTCAGGCTGCCGTAGAGGTTGTTCAACGTCAGCTTAATAGAGATGCTCTGTTCGCTGGAAAATCTGAGGAGGAAGTGGCAGCAATAAAGATCCAAACAACTTTCCGAGTTTACCTGGCTAGAAGGGCATTGCATGCTTTAAAAGGATTGGTC…
Gorai.006G231900	Gorai.006G231900.1	GraIQD21	GAGATACCCAAATATTACAAATAGTTGAAAAAAAAATTAAAGTAGAATATAAAAACCCCCCATGTAATAAAAAAGCAGGGACTGATAATTAAAATAGAAAAAAAAAGAGGCTAAAAGAAAATAAGAGGGTCTTCTATGGCTGGCTGCTACTATCCTTCTTTTCTCTAGCTTCTTATAACTCAGCTTTTTGAAGGGTTTGCTTTCAGAATTTAGGATTTTAGAAGCTCTCCATTTAAGGTACTTACATGATATATGTACGATCTCTTTCAATTTTTTTTTTTGGGGGGGGGGTGGTTAGTATATTGTTTGTTAAGGTTTGGTTTTGTGAATTATGTTGTTCATGCGAAGGTTATCCTTTTTTTTTTTTCTGGTATGTGTGTTTATTATGTTCNNNNNNNN…	GraIQD21	MGKKGSWFSAIKKIFFPHSKEKLNNESDKRSDKEKKKGPGKLRHGETNSFLPLFRKPSSIEKILGEAEREHNLIFRPPTPPEQPKTPPFVPHRPASPQGPSPRVASPRVASPRAASPPRAASPRAASPPPPPPPRAASPRVASPRVASPRGASPKPAPSRIVRPRPEPTLKNQHASATQIQAAYRGYKARRSFRALKGLVRLQGVVRGQHVKRQTTNAMKYMQLLVRVQSQIQSRRIQKLENQERQQAESKEAESTLGKWTSQSEAGNENWDDSVLTKEEREARMQRKVEAVIKRERAMAYAYSNQLWKSTPGSGIRSGGFPWWWNWLDHPLPPVNAPGSQGTKSFQLTPPRPNSQLKPSSRPQSSSSRQRQFTYDNIMETPTPKSTRSTILHAKRRMR…	GraIQD21	ATGGGAAAGAAGGGAAGTTGGTTTTCTGCAATTAAAAAAATTTTCTTTCCACACTCCAAGGAAAAGCTAAATAATGAATCGGATAAAAGAAGTGATAAAGAAAAGAAGAAAGGCCCAGGAAAATTAAGGCATGGAGAAACCAATTCCTTCCTTCCCCTCTTTAGAAAGCCCAGCAGTATAGAGAAAATTCTGGGGGAAGCTGAACGAGAGCATAATCTAATATTCAGGCCTCCCACACCTCCAGAGCAGCCAAAAACACCACCTTTTGTGCCTCATAGACCTGCATCTCCACAGGGTCCATCTCCGAGGGTTGCCTCTCCTAGGGTTGCTTCTCCAAGAGCTGCTTCCCCTCCACGAGCTGCATCCCCTAGAGCTGCTTCACCACCTCCACCTCCACCC…
Gorai.006G241800	Gorai.006G241800.1	GraIQD22	CCTGGTCCCATTTTCACATGGCTTTCTGCTATGTTCCCTTCCAAATCAACCAAAACATTGTTTTGTAATAACCCGATCTAATGAACTCCAACCCGAAATTTTACTTAAAGAAACATCGAGGATGTCACCATTGATATCTTATTACAGGTAGATGAAGATGTTTAATTAGCTATCATTTAGTGTCCTTACCTAATGCTCATTAGATATATAATATACCCTACGAGATCTATAAAATCTTCATTTTTGTGAATACTAGAATGGTTTAAACAGCGATGGGGAAGACAGCGAAATGGTTGAAAAGCTTGTTGACTGGTAAGAAAGACAAAAGTAGAAACATAAGTAATAATCAGAATTCTTCAGTTGTCCCTGAGAATCCAACGACGACCGTTTCGATCCCAC…	GraIQD22	MGKTAKWLKSLLTGKKDKSRNISNNQNSSVVPENPTTTVSIPLPPTTPKEKRRWSFRRSSASATPVRELNSVEQVVTPSPPPPPAPPVVTDVIRVSGSADDEKVDAGEEAAAKMIQAVFRSYLVCYNLLDLMAELIMYLFETFLMRSEVGAIVEQARKALKALKGIVKLQALVRGHLVRRQASVTLKCMQALVTAQARARAQRIRMVEDSRPASRRQSPHRRSTTPDQRLRHGYHEIDSGVEENIKIVEIDHGDSKASLQSRNSYSMEHRFSNHQASPVTSSYLADQISPGACSGHFEDHFFTVAQSSPHYAESETFEYSFCPNYMANTESSRAKARSQSAPKSRPDSIERQPSGRRRSSTEGRNHVPKAMKMKRSSSHVGAAEKNSQYQYQYQYPWSI…	GraIQD22	ATGGGGAAGACAGCGAAATGGTTGAAAAGCTTGTTGACTGGTAAGAAAGACAAAAGTAGAAACATAAGTAATAATCAGAATTCTTCAGTTGTCCCTGAGAATCCAACGACGACCGTTTCGATCCCACTGCCACCGACAACTCCTAAAGAGAAACGACGATGGAGTTTCCGGAGATCTTCGGCTTCAGCGACGCCTGTTAGGGAGTTGAATTCTGTAGAACAAGTAGTTACCCCTTCACCTCCACCACCACCGGCTCCGCCGGTTGTGACGGATGTGATCCGGGTAAGTGGTAGTGCTGACGATGAGAAAGTTGATGCAGGTGAAGAGGCGGCTGCTAAGATGATTCAAGCTGTGTTTCGATCTTACCTGGTATGTTATAATTTGTTAGATTTGATGGCT…
Gorai.007G019100	Gorai.007G019100.1	GraIQD23	TCTAAAATACACCTATCCGTTTGCAGATGTATATTGGAGCTCGTACCCTGTTCCATAATCTGCAATAAAATGATGATAATCATCATCATCATCATCATCATCACCACCATCACCATCACCTTCTCTTCCTCCCTATTATTAATATATCCCTTCACTTTCATCCTATCGCTTGCATTTTCACCATGGTAAACAAAACACCGACCTCGTGGTTGTCAATGGTGAAAAGGGCTCTCGGGTCTAATGCTAAAGATAACGAGAAAAAAAGTTGCAGAACAAGAGAGAAAAGAAGATGGCTATTTAAATGGTCTCAACAACGTAAACCCAAAACCAAATCACAATCCATTGCAGCTGTTAACATCGTTAGGCTTAATTGCAGAGCTTCCAATTACGCCATTGTTG…	GraIQD23	MVNKTPTSWLSMVKRALGSNAKDNEKKSCRTREKRRWLFKWSQQRKPKTKSQSIAAVNIVRLNCRASNYAIVGEKNQAAIVIQTAFRGYIARKALGALKGVVKLQALVRGHNVRRRAKVALKCMQSLVRVLLHQQRARLSYEGCRTAMFIESNSSWESPCLQDVRRRKSITLDKDEKEVEEATKWLDRRRATKQWESHNRASIDKRDSIREPLQLRLASLRCLKEKSSYHSAANSPRLMMVPNYMAATESAKAKVRSQSTPSQRPGNAERAGGGKISPRSTSDLRWMKL	GraIQD23	ATGGTAAACAAAACACCGACCTCGTGGTTGTCAATGGTGAAAAGGGCTCTCGGGTCTAATGCTAAAGATAACGAGAAAAAAAGTTGCAGAACAAGAGAGAAAAGAAGATGGCTATTTAAATGGTCTCAACAACGTAAACCCAAAACCAAATCACAATCCATTGCAGCTGTTAACATCGTTAGGCTTAATTGCAGAGCTTCCAATTACGCCATTGTTGGAGAAAAAAACCAAGCTGCTATTGTCATTCAAACAGCTTTTAGAGGCTACATAGCAAGGAAAGCATTGGGAGCATTGAAAGGGGTAGTGAAGCTTCAAGCTTTAGTGAGAGGGCACAATGTGAGAAGGCGAGCAAAGGTGGCGCTAAAATGCATGCAATCTTTGGTTCGAGTGCTGCTCCAT…
Gorai.007G035800	Gorai.007G035800.1	GraIQD24	CCTCCCTCTTTTACTTATCTTAATCATCCCCTACGCCAACGCGTATCATCTTTTATCAATCTCAACCGTCAAATCCCACTGTCGGTTACAATCTCTGTCAAGTTTCTCCATCTGACGGTCTAAGCTGTCCTACTCAAAATCATTACACTAAAATCGCTTGTACTGGATTAGTCACCGTTATTTTTAGATCCTTCCCTCACTCTCAATACAAAGACACCTAACCACTGCAAACAAAAGCGAAGCCAAAGCGAATAAAAAAAAACAAAAAGGAAAATCTTCCTCTTGTTTTGCTTGTAAGCTTACTCTCTCTTCTGTGCTAACTTTTCTCATAGTACATTTTGATTTCTATTGTCTCGATTTTTGAAATCTTTTCTTCTTTTTAGTGTTTCTTTCTTTGGT…	GraIQD24	MGKSPGKWIKAVLFGKKSSKSGYHKGRENVANVNEVLVSARASEAEVPVAPPFPSQLNQYANERNERDERKLELENKEAANIYNDDRISLPVSQGIGSQESTLQDFQNDPERMKQKQAATIVQAAFRGYLARRAFWALKGIIRLQALIRGHLVRRQAIATLCCVMGIVKLQSHIRGVMARRSDGGLEVHKKYNQMNLWESKPVVSLGVNMPARIGKLSANAFVRKLVASSPPVMPLRLHDDTGEPNSVWNWLERWSASCFWKLVPQPKKASKLQKKQANGQVVETDSGRPKLSVRRIRPANLDGGSVQATSEFDKPKRNLRKVSSHPAEMAVQENPQNELEKVKRNLRKVHNPVVENSVQSRVEPDKPKQSLEKFSSATNPDVVEQSLNSLAEKANKEM…	GraIQD24	ATGGGAAAATCACCGGGAAAATGGATTAAGGCTGTGCTTTTTGGAAAGAAGTCTTCCAAATCTGGTTATCATAAAGGAAGGGAGAATGTTGCCAATGTAAACGAGGTGTTGGTTTCAGCCAGGGCATCAGAAGCTGAAGTCCCTGTGGCTCCTCCCTTCCCTTCACAGCTTAATCAATATGCTAATGAGAGAAATGAGAGAGATGAAAGGAAATTAGAACTGGAAAACAAGGAGGCTGCAAATATCTATAACGATGACAGGATATCACTACCAGTGAGTCAAGGCATAGGTTCTCAGGAATCCACTCTTCAAGATTTCCAAAATGATCCTGAAAGAATGAAGCAAAAGCAAGCAGCAACCATCGTTCAGGCTGCTTTTAGGGGTTACCTGGCTCGCCGA…
Gorai.007G112400	Gorai.007G112400.1	GraIQD25	CTCGTCCATTACACCCTGTTTCTCACGTTCTCCTTCAATTAATCCATTATTATATTTATTTTTTTGACACCCAGTTTTAATATTTATTTCATTTATTAACTTGTAAAAGTTGTTTACGTACTACATTCTGACACCCCCCACCGTCGATGTCTTCCCATGCCCACTATTAAAAAACAAACAAATACAAGATCAAGCTTTAGATTAGATAGACTGTAGATATATTGAATGAATGAATCTAAAGCTCTTGGCTGGTGGCTTGGTTGTTTCCCTCGCTGTTGGGCAAATAACATATATCATTAAATTTATCTGTTCCTCACTGTCTTCCTCTGGCAGTTAAAAGAACTGACCACTGTCATTCTATTCAAACAAACAATCCATAATTCCCCTCATCATTCATGT…	GraIQD25	MGKKGGTSWLTAVKRAFRSPTKDGHDKRSNRRKDEPDHQDEDEDKKREKRRWIFRKPTIQEPVIHQQTTPVKATGRNGAGAASDGATATAAEQRYDTPRAATEGAAVVQVARPTRPSNYAREHHLAAIVIQTTFRGYLARRALRALKGLVKLQALVRGHNVRKQAKITLRCMQALVRVQARVLDQRVRLSHDGSRKSAFSDTNSVLESRYLQDISDRRSLVSREGSSIADDWDERPHTIEEVKAMLEHRKEAALKREKNLSQALSQQMRRARRSPSMGDEDEVECRPKWLDRRTPAKPWDNRGRASTDHRDSVKTVEIDTSQPYSYLAPTYRRTNSNQYHQHGPQNQRPSSPLHRAQQNAPMHHSPITPSPSKARSIQVRSSSPRCVRGDKSSVSSQTP…	GraIQD25	ATGGGGAAGAAAGGAGGGACTTCCTGGTTGACTGCTGTGAAAAGGGCATTTAGATCTCCTACTAAAGACGGTCATGATAAGAGAAGTAACAGAAGAAAGGATGAACCTGACCACCAAGATGAGGATGAAGACAAGAAGAGAGAGAAGCGAAGGTGGATCTTCAGGAAACCCACAATTCAAGAACCGGTGATTCATCAGCAAACAACACCAGTGAAGGCTACAGGTCGTAATGGTGCAGGTGCAGCATCAGATGGTGCAACCGCAACCGCCGCAGAGCAAAGGTATGATACTCCTAGGGCAGCAACCGAGGGTGCAGCAGTGGTACAAGTGGCTCGCCCAACTAGACCTTCAAATTATGCTAGAGAGCACCACCTTGCTGCCATTGTTATTCAGACTACT…
Gorai.008G130200	Gorai.008G130200.1	GraIQD26	CTACACTCTGACACCACCACCATCGATGTCTCAATGTGTTCGAAAGTTCACCCAAGCTTGGATATATTGAAATCTAAGCTGTTCACTTTCGTTGTTTTCCCTTTCATTGTATCTCTCTCTTGAGGAAATATATTTATATATCATTAAATTATCTTGTCCTGTATGTCTTTCTCTGGCAATTTAACAAGAATCCATATTACAATCAGAATCTTTTTTATCTTCACAGTGTTGGTGTCTTGGCTCCTTCTTCAAAGCTTCTTTTAGCTGTAAATGTAGCTTGGTTTAACCCTATCCTTTTGAATGGGGATGAAAGGGGGGACTTCATGGTTGACTGCTGTGAAAAGGGCTTTTAGATCTCCTACTAAAGATACCCATGAAGATGAAAAGGTAAGTGTTTCA…	GraIQD26	MGMKGGTSWLTAVKRAFRSPTKDTHEDEKKRDKRRWIFRKQNTSPVKSVGNNGGGGASTAAAEQRHAIAVAVAKAAEAEAAVATAQAALQAARLTKPSYGRKYHFAAIVIQTAFRGYLARRALRALKGLVKLQALVRGHNVRKQAKMTLRCMQALVKVQSRVLDQRMRLSHDSCSRKSAFSDTNSVWESRYLQDISDRRSLSREGSSIADDWDERPHTVEEVKAMLQHRKEAALKREKSLSQALSQQMRRARRSPSMGGQDEWLDRWMPAKPWDNRGRASMDQRDNVKTVEMDTSQPYSYLAPNYRRTNSNHYHQRPSSPLHRAQHNAQPFHPAPITPSPSKTRPVQVRSASPRCVREDRTSFSSSQTPSLRSNYYYTGRVSTQASTSINNATTLPNYM…	GraIQD26	ATGGGGATGAAAGGGGGGACTTCATGGTTGACTGCTGTGAAAAGGGCTTTTAGATCTCCTACTAAAGATACCCATGAAGATGAAAAGAAGAGAGATAAACGGAGGTGGATCTTTAGGAAACAAAATACAAGTCCTGTGAAGAGTGTAGGTAATAATGGTGGTGGTGGTGCAAGTACGGCAGCAGCGGAGCAAAGGCATGCTATTGCTGTGGCGGTGGCTAAAGCAGCTGAAGCTGAAGCTGCGGTGGCGACGGCACAAGCAGCTTTACAAGCTGCTCGGTTGACTAAACCTAGTTATGGCAGGAAATATCACTTTGCTGCTATTGTTATTCAGACAGCTTTTAGAGGCTACCTGGCCAGGAGAGCTCTACGTGCGTTAAAAGGGCTAGTGAAGTTACAA…
Gorai.008G259600	Gorai.008G259600.1	GraIQD27	AAGTGTCTGACACTTTCCCCCCCACCCTCATCAGTTCTTTTTTTTTTCCCTCCCAATGCCACTAGAAAACACCTACCGCTTAGCAGATATATTGGAGGTCGTACCACCTTGTTAGATTCTGCAACAAATGAATATCATCTTCTCTTCTTTTTCTCTCTCTTGCTTTCTCCTTTACTTAATATATTCATGATTTGTGAAGGAATCGATTGGGACAAATACCCATCTTCTTAATTATCTATCCCCTTTCATTTTCTCCTTCTTCTTGGACCTGACCATGGGAAAGAACACTGCTACCTCTTGGTTGTCAATGGTGAAAAAGGCCTTTAGGTCTCCAGGTAAAGATTATGAGAAAAAGAGTAGCAGGAGAGAAGAATGTGGGCATCAGGAAGAGGATGAAAA…	GraIQD27	MGKNTATSWLSMVKKAFRSPGKDYEKKSSRREECGHQEEDEKKREKRRWLFRRGSSNINHVQQCEAKIPTPTTSTSTATPPANNAAETALDFAEQRHAIAVAAAEAAVATAQAAVEIVRLSSRPSNYANVREHYHYAAIVIQTAFRGYLARRALRALKGLVKLQALVRGHNVRRQAKLALKCMQSLVRVQDRVLDQQRARLSHEGYRRKSMFDETNALWETRYLQDIRRRKSMSRDMSCTTDEWDDRPQTSEEIEALLLTKKEAALKREKALAYAFSNQIWRSRRNPSAEDEKEVEERTKWLDRWMATKQLDNNNRVSTDKRDSIKTVEIDSYKLQSYSSPTIRRRHSLSLNQFPPTPSPCKTKPLQVRSASPRCLKEEKYYTSAANTPSLASTYCTTN…	GraIQD27	ATGGGAAAGAACACTGCTACCTCTTGGTTGTCAATGGTGAAAAAGGCCTTTAGGTCTCCAGGTAAAGATTATGAGAAAAAGAGTAGCAGGAGAGAAGAATGTGGGCATCAGGAAGAGGATGAAAAGAAGAGGGAGAAAAGAAGATGGCTGTTTAGAAGGGGTAGTAGTAATATCAATCATGTCCAACAGTGTGAAGCAAAGATACCAACACCAACAACATCGACAAGTACTGCTACACCACCTGCGAACAATGCAGCAGAAACAGCATTGGATTTTGCAGAACAACGGCACGCAATTGCCGTTGCAGCAGCTGAAGCTGCTGTGGCAACAGCACAAGCGGCTGTTGAGATCGTTAGGCTTAGTTCTAGACCTTCCAATTATGCCAATGTTAGAGAACAC…
Gorai.008G268500	Gorai.008G268500.1	GraIQD28	TTGATTAAAAAGCAATCGGCCGATCGCTTCGCACGGGTTTTCTTCTGTTACTTCCTTTTTTTCTCTCTCAAATTTACTACTACTCTCTTAGCTCTCCTCTGTTTCAGTCTCTTTTTTATTTCCATAATAACATCACCAATTTTTTCTCTTTTCTTTTTTCTTTTCACTTCATTTTTTCTCAGCTTTAACTAATAAAGAAAAAAATTCAAGTAATTTATACCTTATGGAATATGATACAGAGAAAACATGAAGAGAATTCAAGCCAATCGGTAACATTTCATCACCTACCTGTTCTTCTCCGTTTCAGGTTTGATCCACTGCCATGAATTCTCTGTTTTCATTTAACATGAATTTGTAAAATGGCATATAAGTGTTTGTTGCTTTGTCTCTATGTATCGT…	GraIQD28	MGKKGSGWFSTVKKVFKSSHKDLPDKKRENNVEKWPNEAPDAVSFEHFPAESSPDITNNESAMSTPLNEDRNHAIAVAMATAAAAEAAVAAAQAAAKVVRLAGYGRQSKEERAATLIQSYYRGYLARRALRALKGLVRLQALVRGYNVRKQAQMTMRCMQALVRVQARVRARRLQLTDHDKIPKRSDEDYEEKKGTGEVERKPRSLLKRYDSWDGGQQSSEKVKESVSKKHDAAMRRERALAYAYSYQQQQPQQQLMQPHPNGKDVGVHLNDREKAQWGWNWLEHWMSSQPYDARQLGHQEGSYMTLLTTTATTTVTDNMSEKTVEMDVVTAMDSGSYSTLQQAQSGSSNVPSYMAPTQSAKAKVRSQGPMIMKQQRVPHAPQWNPSTKKSPGCDSSSS…	GraIQD28	ATGGGAAAGAAAGGGAGTGGATGGTTCTCGACGGTGAAGAAAGTGTTCAAATCATCTCACAAAGACTTGCCTGACAAAAAAAGAGAGAATAATGTGGAGAAATGGCCAAATGAGGCCCCGGATGCAGTGTCGTTTGAACATTTTCCGGCGGAGAGTTCACCGGACATCACGAATAATGAGAGTGCAATGTCGACTCCTCTGAATGAAGATAGGAACCATGCCATTGCTGTCGCCATGGCAACTGCTGCTGCTGCAGAAGCAGCTGTTGCGGCAGCTCAAGCTGCCGCTAAAGTCGTCCGGTTGGCGGGTTATGGACGACAGTCTAAGGAAGAAAGAGCTGCAACGCTTATACAGTCGTATTATAGAGGCTATCTGGCTCGGAGAGCTTTGCGTGCTTTG…
Gorai.009G027900	Gorai.009G027900.1	GraIQD29	AAAAGCTCCTATAATTGTGAGCTTTATCAGCTTTTCTAGTTTGTTAGCTTTCCTATAAAATAAAAAATGGGGCATTTTCAGATTTCACTTTTAAATTAAAACCCTCTTTTGAACTCTCTTTTTACAATCTTACTCTCAGAGTTGCAGTGCCTGGAAAAAAATGGGGAGAGCTTCAAGGTGGCTAAAGAGCTTGTTTGGGATAAAGAACAGTAAAAACAGCTTCAATCCCAGAGACGGGAAAGACAAGAAAAACTGCGGCATTGAACATTCAGTGGGAGATTCAAGCATTTCCCCAGAAAAGGTTGCGTGGTTAAGATCGTGCTATAATGAAACAGAGAGGGAGCAGAACAAGCACGCCATTGCTGTGGCTGCCGCCACTGCTGCTGCGGCGGATGCAGC…	GraIQD29	MGRASRWLKSLFGIKNSKNSFNPRDGKDKKNCGIEHSVGDSSISPEKVAWLRSCYNETEREQNKHAIAVAAATAAAADAAVAAAQAAVAVVRLTSHGRGTMFGGVHEKWAAVKIQTVFRGYLARKALRALKGLVKIQALVRGYLVRKQASATFHSMQALMRAQATIKSQKARAIINNDAIRFDIRARKSMERFDDTRSEHTVPIHSRRLSASLDIDGSPKIVEVDTGIKPKARSRRTNTSISDFIDDHTYQTLPSPLPCRCPARLSIPDSRHYQDIDWGFSGDECRFSTAHSTPRFINSCAPATPAKSVSGHNFFRPCGDSPNYMANTQSFKAKLRSHSAPKQRPEAGPKKRLSLNEMMESRSSLSGVKMQRSCSRAQEAIHFKNAVMGKLDRSLEFGK…	GraIQD29	ATGGGGAGAGCTTCAAGGTGGCTAAAGAGCTTGTTTGGGATAAAGAACAGTAAAAACAGCTTCAATCCCAGAGACGGGAAAGACAAGAAAAACTGCGGCATTGAACATTCAGTGGGAGATTCAAGCATTTCCCCAGAAAAGGTTGCGTGGTTAAGATCGTGCTATAATGAAACAGAGAGGGAGCAGAACAAGCACGCCATTGCTGTGGCTGCCGCCACTGCTGCTGCGGCGGATGCAGCAGTAGCCGCCGCGCAGGCTGCAGTGGCGGTGGTGAGACTGACTAGTCATGGTAGAGGAACCATGTTTGGTGGTGTACATGAGAAGTGGGCTGCTGTCAAGATTCAAACAGTTTTTAGAGGTTATCTGGCTCGAAAAGCATTACGAGCTTTGAAAGGATTG…
Gorai.009G082100	Gorai.009G082100.1	GraIQD30	CGACGACGTTCGTTTACAGTAGTTCAACCCAATCCCAATTCCCCCTCCTCGGCGTACTTTAACCGATTACGGTCCTCACAAATTCTAGAGAGAGAAAAAAATTGAAAAAAAAAAATCTAGAGAGAGAGAGTATAAGAGGTCTTAAGTAGAGTGAAGAACTGAGGTCTTAAGGTCGACTGAGGTTTGACTTTGTTGATTGATTTTTGATTGATTGTTGATAGATCATAATCAATCAAACGGTTGGAAAAGGTACTACTTCTTTTTAGAACTTTTTTTATCCAACGTTAATTCAACTGAGTTCTTATTTTTTTTTTGGTTCTTCACTTGTTTTAGAGGGTGAATTTACGGCTTTATTTTTAAATTAGTGAGTGTTTTTTAACGTTTTTCAAGCTCCGCACT…	GraIQD30	MGVSGKWIKALVGLKKSEKSQSSEKVENRATGSKFLHRRKHSVEFDTNELQEELDENAASLAENATTRATIDAAGSPSDAFEVHDALLNEHAREEWAATRIQTAFRGFLARRALRALKGLVRLQALVRGHAVRKQAAITLRCMQALVRVQARVRARRVRLALENQTAQQKLQQQLANEAHVKEIEEGWCDSIGSVEEIQAKLLKRQEAAAKRERAMAYALAHQWQAGSRQQSVPAGFEPDKSSWGWNWLERWMAVRPWENRFLDINLRDGVKIREDSPAEGKNGASSQIKPAMRKPAASSLHANLSNKKTGPSHFDGSDSPPGKSACVLEAVNAPSSKPKSKPNHEDSVEEAGSRPVISSRSHSNPKERLTQSDKQAKRRLSMPNTGGGIVSQTTKLSK…	GraIQD30	ATGGGTGTCTCAGGAAAATGGATCAAAGCACTAGTGGGCTTGAAGAAATCAGAAAAGTCTCAATCTTCAGAGAAAGTAGAAAATAGAGCAACTGGTAGCAAATTTCTTCACCGAAGAAAGCATTCGGTTGAGTTTGATACAAATGAACTTCAAGAAGAGTTGGATGAGAATGCTGCTTCACTAGCTGAAAATGCTACTACTCGTGCAACTATAGATGCTGCTGGCTCTCCTTCTGATGCCTTTGAAGTGCATGATGCACTTCTTAATGAACATGCTAGGGAAGAATGGGCTGCCACGAGGATACAAACTGCTTTCCGAGGATTTCTGGCCAGAAGAGCACTGCGAGCATTAAAAGGATTGGTAAGACTGCAGGCCCTTGTCAGGGGTCATGCTGTAAGA…
Gorai.009G137800	Gorai.009G137800.1	GraIQD31	TTTTTATAAATAATACATTAATTCAAACGGAGAGAAGAGAAAGATATTGTGCAGAATCAATGGCAGCAGAGAGATACTGAGCCAGAAATCATTATAGGAAAGAAGATACGGAAACTGAAAGATCTTTCTTCTTCACCTAATAACAGAAGAAAAGAAGATTTTCTTCATATATGCCTATATATATTCTTTTGGACTATTTATAGACAAAAGAGTAATAGCAATAGAAACCAAGTAACCAACCCTTTTGCTTTAATGCCTCTGAATCCTTTGCTCAGTCTCCCAAAAAAAAAAAGGTTGCATCTTTTGCGTCCGGTTTTGTTTTAAAAGAATTGCCATTTGATTTTCTTCTTCTTGTCTAATAAAATAAAGGGTATTTAATATAATATAATATTACATGAA…	GraIQD31	MGKAARWLKGLLGMKKEKDKDRIEQYSSVLSDQKERKRFSFGKSSKGVSEITQSPSNVSTTTDAAWLRSYIAETEKDQNKHAIAVAAATAAAADAAVAAAKAAMAVVKLTSNGRTSLVGGGRERWAAVKIQSVFRGYLSRKALRALKGLVRLQALVRGYLVRKRTIATLHSMQALLRAQTTVRSQRIRRSFNRDHSCCLENKPRSSIERFDEPRSVIHSKRLSASMETNAHDDSPKIVEIDTFKTRSRSRRFNLNALSECGDDFASHTTSSPLLCPVPARTSTPHHQNVDDFEWCFADDECRLSTAQSTPRFANPVRTPIAPATPLSVCGEWYFRRPHSNLPNYMAKTQSFKAKLRSHSAPKQRPEPGAKKRLSLNGLMAARNSISGVRMNTSCYQVDE…	GraIQD31	ATGGGGAAAGCTGCAAGGTGGCTGAAGGGGTTATTGGGCATGAAAAAGGAGAAAGATAAAGACCGGATAGAGCAATATTCATCTGTTTTATCCGATCAAAAGGAGAGGAAAAGATTTAGTTTTGGCAAATCCAGCAAAGGTGTCAGTGAAATTACTCAGAGTCCAAGCAATGTTTCCACCACTACAGATGCTGCTTGGCTTAGATCCTACATTGCTGAAACTGAGAAAGACCAAAACAAGCATGCAATTGCTGTGGCTGCTGCCACCGCAGCTGCAGCTGATGCCGCCGTGGCTGCAGCAAAGGCGGCAATGGCAGTGGTGAAGCTAACCAGTAATGGACGAACCAGTTTGGTTGGTGGAGGGAGGGAAAGGTGGGCAGCTGTGAAAATTCAAAGCGTC…
Gorai.009G142300	Gorai.009G142300.1	GraIQD32	GTCACTTCTTTAACCTCCCAACAACACCCAACGGTTCTTAAAGTTTAAACCCAAACATCACCTTTCCCGCTCCAGTCCACTTGTTATTAACATCACTTGCTCTGTTTCCACCAAACTGAAGCTTTTTTGTTTTCTTTTTCAATTCCTCAAAATGGGTGCCTCAGGAAAATGGTTTAGATCACTTGTAACTTTGAAACCACTTCATGAACCCATTAACCATGTATTTTTCTTCAATCCCATAACTAAGTTTCTAATTTTCTGGAACTCTTTTTTTTCCTTCGTGCTTTCAGTGTTTTTATTTTTTATAATTTTTTTTGTAGGAGAAAATGGGAGATAATAAGTCCAAGAAGAAGTGGAAACTATGGAGGAGCTCATCAGAAGGGTTCGGATCCTCCTCAT…	GraIQD32	MGASGKWFRSLVTLKPLHEPINHEKMGDNKSKKKWKLWRSSSEGFGSSSSKSFKMRHVVAAPLASDSSFMADDLLAAAMATIVRAQPKDFRAVKREWAAIRIQTAFRGLLARRALRALKAVVRIQAIFRGRLVRKQAAVTLRCMQALVRVQARVRAQCLVSSEEQSLHKLDDPTKEAEKRWCDIPGTLEEVKAKQQMRQQGAKKRERAMAYSVSRSYGNGSPNFRANKQQPLSRRHHQRLHRDSPDWDWLDRWMSTKPWESRTIEEPDSTVSRKSEDNIVSFHSTSSEQRDSLKLKTKNPKTSILTRPANQTSCSSSAPSSESVNDKSSTSTSSASVSPTTLSSNTIVVGTLNDSNHTQKPSYMNPTESIKAKQKTFKFSSSDNMWRHVVDDDDDDDLQ…	GraIQD32	ATGGGTGCCTCAGGAAAATGGTTTAGATCACTTGTAACTTTGAAACCACTTCATGAACCCATTAACCATGAGAAAATGGGAGATAATAAGTCCAAGAAGAAGTGGAAACTATGGAGGAGCTCATCAGAAGGGTTCGGATCCTCCTCATCCAAGAGTTTCAAAATGCGGCACGTGGTAGCTGCCCCACTGGCCTCCGATTCTTCTTTCATGGCTGATGATCTGCTTGCTGCTGCCATGGCTACCATTGTTCGTGCTCAACCCAAAGATTTCAGAGCTGTGAAGCGTGAATGGGCCGCCATTCGAATTCAGACTGCATTTCGCGGTTTGCTGGCAAGACGAGCTCTGAGGGCATTGAAAGCAGTAGTAAGGATTCAAGCCATATTCCGTGGTCGTCTAGTC…
Gorai.009G164700	Gorai.009G164700.1	GraIQD33	GAAACACATGTTGTAGGGAGGGAGGAATCAGTGAACCATAGATTCACTTAGGCCAGCCTTTCTACATCAACATATTTCGTCTTCACTCGCGTTCAAAATTTTTAACTTTTTTTTTAAAAAAATAATTTTTTAGAAATCAACCAACACGACAAACTCCCCCAGTCCCCCCGCTCTTCATATCAGTTGTTGAACCCTTGATTGAAGAATATATTTTGAATATGATTTCCCTCCTCTGTTAGACCAGCTTTTTTATTCATTGTGAGACAACAATACAAAAAAGAAACAGAAGAAATTTATAACAAGAGAGAGGAAAAAGCTGGTAATGGGCCATAACAATGCACATTCCACACCCACCCTTTAATTATTCTTTTCTTTGATTTCAGGCTTTCCTTCTTCTTT…	GraIQD33	MGSGNLFKSIINIVKDDNSKKVKGSSASEKSSGFKWKKHQQKASTRPGLISGNSNTLGMPIEDLAATRIQTAFRAYRARKQLRRLKGIVRLQAQTLNSSIKKQATTTLNYLHSWSIIQAQIRARRLCMVTEGHLRQKKIANQIKLEAKLHDIEVEWSCGPETMEEILTKIHHREEAAIKRERTMAYAFSHQWRAPNSDNNGIGNYELAKANWGWSWVERWIAVRPWESRLPAQSITPKKPLNRQINKASKNSSSPKPKPKPHFSNEKETMKMKPRRLSYPGAEKPAARQQSTKAEEENNKKGERVV	GraIQD33	ATGGGTTCTGGAAACTTGTTCAAGTCAATAATAAATATAGTGAAAGATGACAACTCAAAGAAAGTAAAGGGGTCTTCTGCTTCTGAAAAATCCAGTGGCTTCAAATGGAAGAAACACCAGCAAAAGGCATCCACTAGACCAGGTCTAATTAGCGGAAATTCTAATACTCTTGGCATGCCAATTGAGGACTTGGCAGCTACTAGGATTCAAACTGCATTCAGGGCCTATAGAGCTCGAAAACAATTACGTCGATTGAAAGGTATTGTAAGATTGCAGGCTCAAACCCTAAATAGTTCCATCAAAAAGCAAGCTACAACAACATTAAATTATCTTCACTCGTGGAGCATCATACAGGCTCAAATAAGAGCTCGTCGACTCTGTATGGTAACAGAAGGCCAT…
Gorai.009G196200	Gorai.009G196200.1	GraIQD34	TAGGTATACCCGCAATCTCCCGAGAGTCTCGTGACAACTGACAAACAGGATATATATTAATATATGTTTCTAATATTTACTCAACAAAATTTGATAGCTTTCATTTTTATTCGGTTCTACACTTCTACGTCTTACAAAGAACAGAGAAAAGAGAGAGACATGGTAAGCAATGGATCTAACCTGATCTGATGATGATAAAGTGGCGGATTCCAACGTAAAGAACAACACTAGATTTAAGGAATAGGTTTGAGGTCCATGTGTCTTTCTTTTTCTTTGGTTACAATTTCCAACACCGAACCACACGTCAAATATCTGTACTGTCTAGTCTCTCACATAGTGGCTTGAGTTCAAGTCTTAATAAGAGAACGAGCGAGAGAAAAAGGAAAGTCGAGCAAAAAA…	GraIQD34	MGKSTSCFKIITCGGDFAENNDVIHVPEPEIKKSNDKKGWSFRKRSERHRVLSNTVIQEATSGHKESPESSGFNFQQPDASIIPEETSTIEYSEEKPQALTPKEHIEEESKCVASKGYTEEKSQLLIPEDSKVPEPVATATNEAEDDANLGESVVVIIQTAIRGFLAHKELGKLKNLVKLQAAVRGHLVRRHALGTLRCIQAIVKMQVLVRARLSQEGPYDEKKQDGKHCGENQSLQERSAIKQNATYTSIENLLSNRFARKLMDSTQKTKPIRIKCDPSKPNSAWSWLERWMSVSLSKRPSTTELSIEQPEREKSDNCDFQVTTTVPESFPESNEPKLYVRETLVSSESEENLIAHDAANSKFEACQTTSSTVMDDLEQPQIDNSTSDIKEGEENLIT…	GraIQD34	ATGGGAAAATCCACTTCCTGTTTCAAAATCATCACTTGCGGCGGCGATTTTGCTGAGAACAACGACGTTATTCATGTTCCTGAGCCTGAGATTAAGAAATCAAATGACAAAAAGGGATGGAGTTTTAGAAAGAGATCTGAACGGCATCGGGTGCTTAGCAACACTGTTATACAAGAAGCTACTTCTGGACATAAGGAAAGTCCGGAATCTTCCGGTTTTAATTTTCAACAGCCTGATGCGTCCATTATTCCTGAGGAAACCTCCACCATTGAATACAGTGAAGAGAAACCTCAGGCGCTGACACCAAAGGAGCACATTGAAGAAGAATCTAAGTGTGTGGCATCAAAAGGATACACTGAAGAAAAATCTCAGTTATTGATTCCGGAGGACTCAAAAGTT…
Gorai.009G314900	Gorai.009G314900.1	GraIQD35	ATGGGCAAAAAAAGAGATTGGTTTTGGTTTGTGAAGAAAGCTTTGACCCCTGAGTCCAAGAAAGATCAGGTAAAAGTTTGCACAATTTAAGATTTTTTATAATTAAAAAAATTATTTATGAAAATGAATCGTTTTGAATAATATAATACAACATCATCGATTTATTGGACAATATAACCTATAAAAAGGGGTGAGGCCAAAATGTCAATGCAACATCCTTTTTCACTCAACTTTTACTCTTTTTAAAAATGGTATATAGTTTAGTTTTATAATTTTATAGTTATAGGTGTGGTATAATTTTGAATTCTATACATCTATTTTACGAAAACTAGAAGTTAATTTATTTATTTTAATTTGTCATATTTTGATTTTTGCATGTTTTGGAATTTAGAAAATTAA…	GraIQD35	MGKKRDWFWFVKKALTPESKKDQESSKSKKKWQSKTKDSEPAVPLPQETETETKTEEPEPPPSEDAKPAEAENEPKRHTHFIALATAMAAAAAVAASKATAEAVRVASLQRISSERTAATKIQTAFRGYLARKALPELRRSERLKSMIEGQSVKEQAKSALRCMQTMGGVQSRIRGMRLRMLEENQILHHHLQQKRHKELDKFNASMGGEWHDGRKSKEQSEAIKQYKQEAAMRRERALAYAFTRQRSWKVSSKAANQTLMDQNTPHWGWSWLERWMAARPWDIPCSSPNSASVNTLVSPSISNNDNKPSPTPSKPTPPPPSKIPSFSSLSSQIRQPSPRGTPPGGVECSTPDRDRRRQSSIGGFSSAKDDKSVGSSAEKAPSWMKQVRASQLSRSLKH…	GraIQD35	ATGGGCAAAAAAAGAGATTGGTTTTGGTTTGTGAAGAAAGCTTTGACCCCTGAGTCCAAGAAAGATCAGGAAAGTTCAAAATCAAAGAAAAAATGGCAAAGCAAAACCAAGGATTCGGAGCCTGCAGTTCCTTTGCCTCAAGAAACTGAAACGGAAACAAAAACTGAAGAGCCTGAACCTCCTCCCTCTGAAGATGCCAAACCAGCGGAAGCTGAAAATGAGCCTAAAAGACACACCCACTTCATCGCTCTTGCCACCGCTATGGCTGCTGCCGCCGCGGTCGCAGCTTCTAAGGCGACTGCTGAGGCTGTTCGCGTCGCTTCTTTACAACGCATATCGTCGGAGAGAACGGCTGCTACCAAGATTCAAACTGCATTTCGCGGATACTTGGCTCGGAAG…
Gorai.009G420200	Gorai.009G420200.1	GraIQD36	AGAAAGAAGTAAAAAATAAAAATAAAAAGTTAACAGCTGTTTCTTCTTCATAATCTCTAAAATTTTTTTCTCAAGATAGGCGTTAGGCCGGCAGCTAACAGAGCTGCGAACCCTTTCAATCTTTTTTATTGTTTTCTGAAAAGAAGGGAAAGAGACCTCTTCAAGTTCTTTGAGATCCGGGCATTGCATTCTCAGGTACTTTTTGCTTCATGGACCCCGATTTTAAAAGATGCATTTTAAACTTCCTTTTGTTTGAATTTTCTGTTGCTTGGTATCATTAATTGTGCCACCAAATCTGGGCTGTTCCCCAATTTGTTAAATACACTGGGACATATTGGAGTTTTGCCTCATTAGTTGAATTGAAGATAGATAAGTTAAAACCCCTTCAGATTCTGCTAA…	GraIQD36	MGKKGKWLSSLKKAFFSESKRKKNQVRISLVQLKIICSFMVSSVFNILDYYVSQKSKEQFLEKKVHFDPTGSDAAKLSPLPQPEEVKLIEPEVEQSKQTYPVAVANSPAVPAQVALQAIRHQLNTDARFAGKTKEEVAAIKIQAAFRAYLAKRALRALRGLARLKSLMEGPAARRQAAGSLRCMQTLSRMQCQIHARRTRMMEENQALQRQLLQKHAKEIVNLQMGEDWDDTVRSKEQIEASLLSKHEAAMRRERAMAYSFTHQQTWKNASRSMNPLFMDPSNPSWGWSWMERWMTARPWEVRGGMRDKEHLDDQSSLKSARSNFGGEISKAYARYQLNLDKQSTKANQKPSRTSSLLSPSTPKSASIPARKLKSASPRSGVAGLDDETRSIVSMKSDR…	GraIQD36	ATGGGAAAGAAAGGGAAATGGTTGTCCTCTCTAAAGAAAGCCTTCTTCTCAGAGTCCAAGCGAAAGAAAAACCAGGTTAGGATAAGTCTCGTTCAGCTAAAAATCATCTGTAGTTTCATGGTTAGCTCAGTTTTTAATATTCTTGATTACTATGTTTCTCAGAAATCAAAAGAACAATTTTTGGAGAAGAAGGTGCATTTCGATCCCACTGGTTCTGATGCAGCCAAGTTATCCCCACTTCCTCAGCCTGAAGAGGTGAAATTAATTGAACCTGAAGTTGAGCAAAGCAAGCAGACTTACCCTGTGGCAGTTGCCAATTCTCCTGCCGTTCCAGCTCAGGTTGCTCTACAGGCCATTCGACATCAACTTAATACAGATGCTAGGTTTGCCGGAAAAACT…
Gorai.010G005800	Gorai.010G005800.1	GraIQD37	GTTCATAAGTAGCTAGATTTAAGGAGTGAGTTTGAAGTCCGTGTTGTGTTTTTTCTTTCTCTTTTGTTCTTTCTTTGTTTTACAATTTCCAACAAAAATATTATCTCTCGTGTCTTGTCTCTCAGTCTGTTATAGTAAAAGCTAGAGGCACCAAAAAAAAAACCATGGGAAGATCCATTTCCTGTTTCAAAATCATCACTTGCGGCACTGATTCAGCTGATAAAAACGACGACGTTATCGATGTTCCTCAGGTATATGTGTTATCCTTTTAGCCTTTACGGCGGCTGTTCGTTGGATTTAAGATTTCATGTTTTTTTTTTTTTTGTAATTGATGTTTTTAGTTGCTTTAATTGAAGTTTTCAGAGGAATCGATGCTTTAGAACTTGACATCTTTCATTA…	GraIQD37	QKYYLSCLVSQSVIVKARGTKKKTMGRSISCFKIITCGTDSADKNDDVIDVPQDKRSSDKKGWSFRKRSERHRVLSNTVVQEASTGLEESPETASYVQQSDVSVAPEKTSTVQYTEEKLQSVAPKDYVEEKSQLSTQEDLKVPEPVVAATNEAKDDSNVDESVVVVVQTAIRGFLARKELGKLKNLVKLQAALRGHLVRRHAVGTLRCIQAIVKMQMLVRARHARLSQEGSYSEKNAASTSIEKLLSNRFARQLLDSMPKTKPIRINCDPSKPSPGWSWLERWMSTSSSEKTSMAELPNEQPRDSPLDATVPSKAISESNDVNKTLVSSESEENLITYVAADSKSKACLPTSSVTGDLERTQIDNMSTSDLKETSLDQTIETEAHCLDVGVESLDAVLS…	GraIQD37	CAAAAATATTATCTCTCGTGTCTTGTCTCTCAGTCTGTTATAGTAAAAGCTAGAGGCACCAAAAAAAAAACCATGGGAAGATCCATTTCCTGTTTCAAAATCATCACTTGCGGCACTGATTCAGCTGATAAAAACGACGACGTTATCGATGTTCCTCAGGACAAGAGATCGAGTGACAAAAAGGGATGGAGTTTCCGGAAGAGATCTGAACGGCATCGGGTGCTTAGCAACACTGTGGTACAAGAAGCTTCTACTGGACTGGAGGAAAGTCCTGAAACTGCTAGTTATGTTCAACAGTCTGATGTCTCCGTTGCTCCTGAGAAAACCTCCACCGTTCAGTACACCGAAGAGAAACTTCAGTCAGTGGCACCTAAAGATTACGTTGAAGAAAAATCTCAA…
Gorai.010G192000	Gorai.010G192000.1	GraIQD38	CTTGAGAAAAAGTGGGGAGTTGGAAAAGGATGGAAAGGCCCCATGCCATGAAGCTCAGACAGTGAGACTTTCTCATAATTCATTGAGAGCTTCCCTCCATGAAATACTGTATAGCTTAGCTTTATTTTTATTTTTATTAGTCATACAGTGGTTGCCTGGAAGGCCCACAACTTTGAACAGATGAAACTCATCATGAAGAAAAACTATGAATCCTTGGACAGATCTTTATTTGTACATGGCTAGATTTTAATCAAACTTTTGGGTGTCTGTGGCTTCAGTTTCTCAAGGAAATATTTTGGGGTTTCTTCAGTTTATGTGATCAAGTCCCCCACTTTTCTTGGTTGTAATAAACAATGGTTGATCTAAATCCCCGGCAATCCTATCCAAGTTTTTTTGAAG…	GraIQD38	MAKKKSWFSLVKKFFLFETIARTEKKEKKRKWMFGRLRTKRLTAPPNDVTKDEHVTVAIATPAAAEAGVAAAQVAAEAVPPYGTLHSNHICDGETDERALDVQELAATKIQATFRGYLARKALRALKGIVRLQAIIRGSAVRRQAMNTLKCLQSIVNIQSQVSAMRFQMAEGTWQYDETKQLVTLEDKIIKVDINSQRRWDDSILTKEEAEAMVLSRKEAAIKRERIKEYSYVHRKSAESELNKGNGRLKYWLDEWVDTQVTKSKELEDLDSVWTSNRKPMEENRAKHLRLKTSPRPYHYNSEGLESPVVPVPRRSFHKKQCSLGEDNSFPTSPVVPPYMAATQSARAKVRSLSSPKVRPGSFETQSESYSPFKNKLCLISSITSEVPSSYKMNGSRSS…	GraIQD38	ATGGCTAAGAAAAAGAGCTGGTTCAGTCTAGTGAAGAAGTTTTTTCTCTTTGAGACAATTGCAAGAACAGAGAAGAAGGAGAAAAAAAGGAAATGGATGTTTGGAAGGTTAAGGACCAAGAGGTTGACAGCACCACCAAACGACGTGACAAAGGATGAGCATGTAACTGTGGCTATTGCCACACCTGCTGCCGCCGAAGCAGGTGTTGCAGCCGCTCAGGTTGCGGCCGAGGCTGTTCCACCCTATGGTACCCTTCATTCTAACCATATATGTGATGGAGAAACAGATGAACGAGCCCTGGATGTTCAAGAACTTGCTGCCACAAAAATCCAAGCTACCTTTCGGGGATACCTGGCAAGGAAAGCTTTGCGGGCGCTGAAGGGGATAGTGAGGCTTCAA…
Gorai.010G204200	Gorai.010G204200.1	GraIQD39	ATGGGCAAAAAAGGAAGCTGGTTTACTGCTGTGAAGAAAGTTCTAAGCCTTGAACCCAACAAAGATGAGGTTTCATTTTCAATTATTTTATTTCATAATCTAATTGTTTTTTATTTAATTTTTTGTATTTTTTTTATTTCACCAGAAGATTCAAAAATCCAAGAAAAATGGGGTTAAATTACCTGAGAAGATCAAAGGAAGCAAACGTGACAACTGGTTCGCTCCGGCCACCACCATGGTGACCGGCGCGTTGGTTCGCCTTACTTTGTCGCCACACTACTTGGGAAAATCAATGGAGGAAATAGCTACTGTTAAGATTCAAACTGTTTTTCGAGGATACTTGGTATCAAATTTCTTCCCCCATTTCTTTAATTTGAAATTTCTTATATTAAGTAATTT…	GraIQD39	MGKKGSWFTAVKKVLSLEPNKDEKIQKSKKNGVKLPEKIKGSKRDNWFAPATTMVTGALVRLTLSPHYLGKSMEEIATVKIQTVFRGYLARKALRDLRGLERLKSLIQGQSVKRQATITLRCMRTLARVQSQTRTRQLRVSEQNRALQKHLQTKYEKQLQNSKSYMGEDWNVSTKSKEQMQAKQQYRQVAALRRERALAYSFTHQRSWKVTCRSMNHTSMDPFNPKWSWSWLERWMSTRPWEIQNAPDNNDHSPSKSVGAEITKAKFQSDVNNDHNKQSSTPAKPIRPPNRRSSSTPPSKMHSISSKKGLQSPSPTRIQLPDRYKRHSIGGLSLERDDEVFANSPPSNKIPARSSSKDRSRPPSINRNPVNTRRHSGPPKVDIFPN	GraIQD39	ATGGGCAAAAAAGGAAGCTGGTTTACTGCTGTGAAGAAAGTTCTAAGCCTTGAACCCAACAAAGATGAGAAGATTCAAAAATCCAAGAAAAATGGGGTTAAATTACCTGAGAAGATCAAAGGAAGCAAACGTGACAACTGGTTCGCTCCGGCCACCACCATGGTGACCGGCGCGTTGGTTCGCCTTACTTTGTCGCCACACTACTTGGGAAAATCAATGGAGGAAATAGCTACTGTTAAGATTCAAACTGTTTTTCGAGGATACTTGGCGAGGAAGGCATTGCGAGATTTGAGAGGGTTAGAGAGGTTGAAATCATTGATACAAGGGCAATCCGTGAAACGACAAGCCACTATTACGTTACGATGCATGCGGACACTTGCTCGAGTGCAGTCCCAAACT…
Gorai.011G032700	Gorai.011G032700.1	GraIQD40	AAAAGAACTCGTCAATTGTTTGTTGTCCAGTCTTTGTTGTTGGCCCTATCATCTTCCTCGTGTTGAATCTTCTCAAAAAGGAAAAAGGTCAAAAAATAAAAATAGAAATAAAAAAACCCAACCAACACTCAACCAACCACTAAGACAACCTCTCCCAGCGTTTCATTTCAGTTGTTGAACATTTTAAATTAATTTGTAAGAGACATTTCAGAAATATATGGTTTTAATTTTATTTCTCTTATTTATTCCTGTTAGGCCAAATTTTTGTTCTTTTATTTTCAATCGGGGCCAAAAAGTAAGAAAACAGAAGAAATATAAAAACAACTAGAGAAATAAAAAGCTGGTTATGGGCCATGGCAATCCATATTCCACAACAACCCTTCTATTATTTTCTTTTCT…	GraIQD40	MGSGNVLKTLVNIVKDDSSKQVKRSSASTKSKGFKWKKLQRKTSMRTKFIRDSAALGMSIEDLAATRIQTAFRAYRARKKLRLLKGIVRLQAKTKTYSIKKQATTTLNYLHSWSNIQAQIRARRLCMVTEGRLRQKKIANQLKLEAKLHELEVEWSGGPGTMEEVLTKIHQKEAAAVKRERTMAYAFSHQWRAPNSINNGLGSYKLAKANWGWSWVERWIAVRPWERRLPTPSTTPKSTPKEPQNKQTSKGGKNSNSPKPKASVSVKPPLSNARGAMKPRRLSYPGAEKPAARQVNTKADKINIEKEEIST	GraIQD40	ATGGGTTCTGGAAATGTGTTGAAGACACTAGTGAATATAGTGAAGGATGACAGCTCAAAGCAAGTGAAGAGATCTTCAGCTTCTACAAAATCCAAAGGCTTCAAATGGAAGAAACTCCAGCGAAAGACGTCCATGAGAACAAAATTTATTAGAGATTCTGCTGCTCTTGGTATGTCAATTGAGGATTTAGCAGCAACTCGGATTCAAACCGCATTCCGAGCCTATAGGGCTAGAAAAAAATTACGTCTATTGAAAGGTATAGTAAGATTACAGGCTAAAACCAAAACTTATTCAATCAAAAAGCAAGCTACAACAACATTAAATTATCTTCATTCATGGAGTAACATACAGGCTCAGATAAGAGCTCGTCGACTATGTATGGTAACGGAAGGCCGTCTT…
Gorai.011G135300	Gorai.011G135300.1	GraIQD41	TTTGACCATTTTCTCCAAGGCTTGAGACTCGGGCAAGCGGAGGTATCCATGGTTGCGAATCTCAGACAGAAACTCGAAAAATCTTCGTGTTTCTCCTTGCAGGTCAAACCTATCAGACCAGACAGATAGTTCACACTTGAAGCATGTCTGGTATGTGAAATACATTTTAATATAAAATTTATATTTACAACATTAATGGTTAAGGAAAAAAAGAATTGAAAGAGTACCAAACCTAACCGTTTAAATCAGTGAGTGGGCATGGTTGCTGTCCAAATAGTCTTCCTATTCAAGTAAAGGTGGTTGAAGTTTGGCACATTGAGTGAAAAAGTGGGCAACCCTTTTTCTCTCAACCCTTCCCTTTCTTATACTCGTTTTCTGATATGAATGTGATCATCATCA…	GraIQD41	MGKKGSWFSAIKRVFIPHSKEKLSNESDKRSGKEKKKKGLGKLRHGETNSFIPLFREPSSIEKILGEAEREHKLVFRPPTPPEQPTTPPFVPHKDASPRVPSQRIASPRIASPRAASPRTVSPPRAASPRAAPPKVVRPRPEPTLRNHHASATKIQAAYRGYMARRSFRAWKGLVRLQGVVRGQNVKRQTSTAMKRMQLLVRIQSQIQSRRIQMLENQARQEVHFKNDKEVESTLGKLAFSQASEAGNEDWDDSVLPKEEIEARMQRKVEAVIKRERAMAYAYSHQLWKTTPKPVHADIRTRGFPWWWNWLERQLSSSNTPESQGIKNFPLTPPRPNSELKPSPKPPLSSKQHQFMFDNMDTPTPKSTRSTTRPMQTPPSRILQGSSSGLSKYSRPRAS…	GraIQD41	ATGGGAAAGAAAGGAAGTTGGTTTTCTGCAATTAAAAGGGTTTTCATACCACACTCCAAGGAAAAGCTAAGTAATGAATCGGATAAACGAAGTGGTAAAGAAAAGAAGAAGAAAGGCCTAGGAAAATTAAGGCATGGAGAAACCAATTCCTTTATTCCCCTCTTTAGAGAACCCAGCAGTATTGAGAAAATTCTTGGGGAGGCTGAAAGAGAGCATAAACTAGTATTCAGGCCTCCAACACCTCCAGAGCAGCCAACGACACCACCTTTTGTGCCTCATAAAGATGCTTCTCCAAGAGTTCCTTCACAGAGGATTGCCTCTCCTAGGATTGCTTCCCCGAGGGCTGCTTCTCCAAGAACCGTTTCCCCTCCACGAGCTGCTTCTCCAAGAGCTGCTCCA…
Gorai.011G167700	Gorai.011G167700.1	GraIQD42	ATGGGGAAGACAGGAAAATGGCTTAAAAGCTTCTTAACATGCAAAAAAGTTAAGGAGAAAGAGAAAGGGAAATACGCAAGTAATCAGAAGTCGTTGGTTGCTCTAGAGAATTCTACTACGATTTCAATCCCATCAACTTATTCTAAAGAGAAAAAGAGATGGAGCTTTCGAAGGTCGTCAGCTACGTTAATGCCTACAAAGGGCATAAATTCTACAGAACAAGCTCCAACTACTCCACCGCCTTCAGTGGAGGCAGCCACTAAGCCACTAAGGATGAACAAAAAAAGGATGCCATGGCTGTCGCAGTGGCAACAGTAGCACCTGCTGACGTTCCTATTGCAGCTGTGATCCATTTAACTGCTACTGCCACTGAGAAAGTTGGCGTAGCTGAAGAAGCTG…	GraIQD42	MGKTGKWLKSFLTCKKVKEKEKGKYASNQKSLVALENSTTISIPSTYSKEKKRWSFRRSSATLMPTKGINSTEQAPTTPPPSDAMAVAVATVAPADVPIAAVIHLTATATEKVGVAEEAAVTKIQSIFRSYLARKALNALKGLVKLQALIRGHLIDREMKENIKIEEIDLGDSKGCLMSRNNYSYHSQEERVVEHRFSSHYPSSRACFKQENYQLSSPPSALTDMSPRACSGHFEDYSFTPSKSSPRNYSNISKPPLALQRTEYVESTSYKYPLFPNYMAKTESSRAKSRSQSETKSRQDSFERQPTRTVRMQRSFSLIGATAQNHQYTWSIKLDRSIVSLKDSEYGSTSIVLTSINYCRPLVAYNVSMK	GraIQD42	ATGGGGAAGACAGGAAAATGGCTTAAAAGCTTCTTAACATGCAAAAAAGTTAAGGAGAAAGAGAAAGGGAAATACGCAAGTAATCAGAAGTCGTTGGTTGCTCTAGAGAATTCTACTACGATTTCAATCCCATCAACTTATTCTAAAGAGAAAAAGAGATGGAGCTTTCGAAGGTCGTCAGCTACGTTAATGCCTACAAAGGGCATAAATTCTACAGAACAAGCTCCAACTACTCCACCGCCTTCAGATGCCATGGCTGTCGCAGTGGCAACAGTAGCACCTGCTGACGTTCCTATTGCAGCTGTGATCCATTTAACTGCTACTGCCACTGAGAAAGTTGGCGTAGCTGAAGAAGCTGCAGTCACAAAAATTCAATCCATCTTCCGGTCATATTTGGCT…
Gorai.011G295300	Gorai.011G295300.1	GraIQD43	GGACAATGCTAAAACATCTCATAATTCATTGAAGAGGTTGGTTGGTTCCCTCCATGAACTACAGTGAAGCTCAGCCCTTTATTTTATTTTATATTTTTTGGAAGGCCCACAACTTTGAACATATGAAACTCATCACGAAAAAGATGGAAAATTATGAATCATTACCATCAACCATTGAATTTAATCAACTTTTGGGTGTTTGTGGTTTCAGATTTTCAAGGAAAAAAAACTATAGCTTTCTTCAGTTATGTAATGGAATTCCTCGCCAATTCTATCTTAATCTAAGCTATCCAAGTTCCAAAGACTAAAGCTTTTCTGAAGCGGTGATTCCTGTTTGATTCTCCCAAAATATGTAAGTATTCAGTGCACCTTTTATACACAATCCATATGGAATTTACC…	GraIQD43	MAKKKSWFNLVKRFFLFETLINAQKDNRRKWMFGRFRTKRLASIKAPSPPRDNIKYETEEDQKKHALTVAIAAVAAAEAAVAAAQVAAEVVRLTGADAPKAKEEQTIDVKPDCSSSSELDNQFQQLAAVKIQASFRGYLARKALRALKGIVRLQAIIRGRVVRRQALTALKCLQSIVNIQSQVCARRFQMVEGTWQQHDENKELITLKDKILKVDTDSQTRWDNCNGGLKYWLDQWVDTKSKDVEVEDIDSVWTSNRKPTRLKTFSRQYHCDAEGVDSPVRVQRRRSFHGKQGSLGEDSSFITSPVVPTYMAATQSTKAKERSMSSPKLRPGTCDTQSESYSPYKNKLCLISSVTSKPNAYEQRSPTLKGIKSKQTLKDLSFDSECSLPNWVQKSTFK	GraIQD43	ATGGCGAAGAAGAAGAGCTGGTTCAATCTAGTGAAGAGGTTCTTTCTCTTTGAGACACTTATAAATGCACAAAAGGATAACAGAAGGAAATGGATGTTTGGAAGGTTTAGGACCAAAAGGTTAGCATCCATTAAAGCTCCATCACCACCAAGAGACAACATAAAATATGAAACAGAGGAAGACCAGAAGAAACATGCCTTAACAGTGGCAATTGCCGCAGTGGCTGCTGCTGAAGCAGCTGTTGCAGCTGCTCAGGTTGCAGCCGAGGTTGTTCGCCTCACAGGCGCTGATGCCCCTAAAGCTAAAGAAGAACAAACCATTGATGTTAAACCTGACTGTTCTTCATCTAGTGAGCTTGACAACCAGTTCCAACAACTTGCTGCTGTAAAAATCCAGGCT…
Gorai.012G010000	Gorai.012G010000.1	GraIQD44	AAGTTAAGGAGGAGCGGTCTTTCACATCAAATCCAAAAGCTAAAAGTCAATGTATCCGTTAAGATTTATTAAAGTCAATTTATTATGTAGTCCTTTATTTTCGAATTTCAAAATTTCAAAATTTAATCTTTCCCAATAAAATGCTCGCTTATGCCTATGCCTATGCCCCAAATCATCCCATCTGCTAAACATCATCACCATCATTTGCTGTTTTTCCTGCAAATTCTAGCTTTTTCCAAACAATGGGTGCCTCAGGAAAATGGTTTAAATCGCTTATAACTTTCAAACCACTTCAAGATCCTACTAATCAAGTAACTTCACACTAGGTTTACCTCTTTTTTCTTTCTTCTTTTTATTTATGCTTTCATGGTTTCATTTTTCTGTTAATTGGGTTTGTAG…	GraIQD44	MGASGKWFKSLITFKPLQDPTNQEKVGDKTKKKWRLWRSSSEGLGSISSKVPRMHHVAASEASDSSLLVDDVLASAMATVARAPPKDFRAVKREWAAIRIQTAFRALLARRALRALKAVVRIQAIFRGRQVRKQAAVTLRCMQALVRVQARVRAQCVTSSEGQAMPKLMDEDPAKQAERGWCDSLGTLEELRAKQQMRQQGAIKRERAVAYSVLKQQSRSCASPNARANKQPYSHNHQRLDRNSPDWNWLDRWMATKPWDTRAMEEGTEPAEMVMMMNTISRKSEDNNFSFHSSSYEHEPLKVKRNNVTTRILARPPTSMQTSGSLSAPSSESVYEETSTSTSSASPTTLSSNTPVAGTLEDNHAQKPSYMNPTESIKAKQKKTFRFSPDNVRRRHVVD…	GraIQD44	ATGGGTGCCTCAGGAAAATGGTTTAAATCGCTTATAACTTTCAAACCACTTCAAGATCCTACTAATCAAGAGAAGGTGGGAGATAAGACGAAGAAGAAGTGGAGGCTATGGAGGAGCTCATCCGAAGGGTTGGGATCCATCTCATCAAAGGTTCCCAGGATGCACCACGTGGCTGCTTCAGAGGCCTCTGATTCATCTTTGTTGGTGGATGATGTGCTCGCTTCAGCTATGGCTACTGTTGCTCGTGCTCCACCCAAAGATTTCAGAGCTGTTAAGCGGGAATGGGCCGCCATTCGAATCCAGACCGCATTTCGAGCCTTGCTGGCAAGACGAGCTCTAAGGGCGTTGAAAGCAGTAGTGAGGATTCAAGCTATATTCCGGGGTCGTCAAGTCCGAAAG…
Gorai.012G093900	Gorai.012G093900.1	GraIQD45	GTTTTGTTGCTTGTTTTGATTAATTTATTTTAAAGTGGTCTAGGGGACATGCTGGGTCCCAACTTTTCTTAGTTATCCTCTGCAAATGCCAACCTGTTCTTTTATTATTATTTTCCGCCATTTTTGCTCTCTTTCAAGCTTTATTTTTTGCCTAGATCCACTTCTCTCTCTTTGATTTTTAATTACTGCATTTTTGTTTTAATACACAATAAGAACAACTAAGAGATAGAATGTGACTTATCAATCTTTTAACTGAGATCTGTGAGAATTTTTCTATGTACCAAGGTATTGTAAATTTTCAGTACTTTCCTGGGTACATTTTTGTTTTCATTTTGAACGTATTTATTGAGTTTTTGTCTTAATAAAACTGTTCAAATTTGGAAACTTTGATATGGTTTT…	GraIQD45	MFLKNRNYLQMGKKGGWFSIVKKALSPESKKSQHQTPKPKKKWFGKSKDLGPVSVPEETEVITEDVKLKEAENEQSKHAYSVALATAVAAEAAVAAAQAAAEVVRLTSQPRHLGKSKEEIAAIRIQTAFRGYLARRALRALRGLVRLKSLIRGQSVKRQATTTLRCMQTLARLQSEISARRIRMSEENQALQRQLQQKCQKELEKLRAPMGEDWNDSTQSKEQIEARQQNKQEATMKRERALAYAYCHQRSWKNCSRSVNQTFMDPSNSHWGWSWLERWMAARPWEVRSTTDNNDRGSVKSMGARSISISEISRAYSRRDLNNDNKPSPTPQKSSRVPSHQSPSTPPSRAPSISSVSGKTRLPNPRGSQWGGYEDSRSILSTRSDRYRRHSIAGSSMRD…	GraIQD45	ATGTTCTTGAAGAACAGGAATTATTTACAGATGGGAAAAAAAGGTGGCTGGTTTTCTATTGTGAAGAAAGCTTTGAGCCCTGAATCCAAGAAATCTCAGCACCAAACTCCAAAGCCAAAGAAAAAATGGTTCGGAAAAAGCAAAGATTTGGGACCTGTGTCTGTGCCTGAAGAAACTGAAGTGATAACTGAAGATGTAAAGTTAAAAGAAGCTGAAAACGAACAAAGCAAACATGCCTACTCTGTGGCTCTTGCCACCGCTGTGGCGGCCGAGGCAGCGGTGGCAGCTGCTCAGGCGGCTGCTGAAGTTGTCCGTCTCACTTCTCAGCCGCGCCATCTGGGGAAGTCAAAGGAGGAAATAGCTGCTATCAGGATTCAAACAGCATTTCGTGGATATTTG…
Gorai.013G013200	Gorai.013G013200.1	GraIQD46	TGAATTTCAATGAAGAAAGTAACACCATGTGAGCTGAGGACCTGTCTGTAAATTCCTTTTAAAATAAGAAAAGCAAACATTTGAAGACATGGGGCTGTTATGATAGCGACAGATGGGGGATTAGAAACCAACACTCAGTCGCTTGTGCTCTTTTAAAGATCATGACTCACTCTTCATCAAAGTGCCTGCATTTGCCACATCATTGTAAATGATTTCAATGTGGTTCAAGCATACACCATTGACCAACTTAGATTTATCTTCAATATATATATGTTTGATTGTTGTCCTTGTGGTTTTTATTCATCCATATGTCATTGTTATGATACAAAGGATTTGAAGCCAGGTCTGTTTTTTGCTTCTTTAATCTTCATATTTTTCTTTTTCTTTTTTCTCTGGTTT…	GraIQD46	MGKKRSWFSWVKKIFASNAQPKTQKKSRRWRWIFGKLKLKQCRPALPAIPQQKSLCQATEDQRKHALNLAIATAAAAEVAVAAARAAAEVVRLANASNHFSNFTTKDRNRAAIKIQTAFRAHLARKALRALKGLVLLQAIIRGQVTRRRAMKNMKCLQSGTEMYPGIKEKVICQDTRRNQSLVHKDQLQVKDIIEHEYYSRRNWNDSVFSKEDAEAVWLRRQEAMAKRERMKKYSYSHRERVNSYMLDESVHVKETGRNSFLEAEANSEGTRRERMMILKHNVASNSSTWEVHGLQGLNSPYLFPRRSFCRVQNQNPAGNDSSVPSSTVFPTYMAATESAKAKVRSMSTPRQRLGLSDTCFDHNMPYKGGLSLWSTYNGETFKYQ	GraIQD46	ATGGGAAAGAAAAGGAGCTGGTTTAGTTGGGTGAAAAAGATTTTTGCTTCTAATGCACAACCAAAAACACAGAAGAAATCAAGGAGGTGGAGATGGATTTTCGGAAAACTAAAGCTCAAGCAATGCCGCCCTGCATTACCGGCGATACCCCAGCAGAAATCGTTATGTCAAGCAACCGAGGATCAAAGAAAGCATGCTTTGAATCTTGCCATTGCGACAGCTGCTGCAGCTGAAGTTGCGGTTGCTGCAGCACGAGCGGCAGCCGAGGTCGTTCGTCTGGCTAATGCCTCTAACCATTTCAGTAATTTCACAACAAAGGATAGGAACCGAGCTGCTATTAAGATCCAAACCGCTTTCCGGGCACATCTGGCAAGGAAAGCCCTACGGGCACTAAAGGGA…
Gorai.013G082700	Gorai.013G082700.1	GraIQD47	ATAAAAATAATCTTACCTTCTTTGCCCTAACATCGAATGCATAAAAAATAAGATAAAGATACCTCTCCCCCGCTCCATTGATGTCACTAACCCTAATTATACTTACACACCTACTTCTCTTGTGATTCATTTTACACATTTAATTCTGCAGGCCGTTTTCATATCTTTCTTAGCTTTTATTTAGTTTTAAATTCACTCCAAAAAAAAAAAAAAAAACTGCACGAGAATCTCTTGTTCGAGGAATCCTTCACGGTACGAAATTCGTTCTTCAGATCTCTGAATGCTCACTGTTTAACTGTTCCTTTTTTTCTTCCGTTAATGGCAGCTTAGTAGCGAACTAGGACTTCAAATTTGCTGCATTTTTCAGGTAAAAGTTTTTGATCCTCTCTTCTCTTTCAC…	GraIQD47	MGKSPAKWIKTLLLGKKSSKSSFSKEKEKLKSANKGEVLVSSKVTVSDLSVDPPSISAPVLVNSARNVVDSEKGIPAQLPNDGANIPSPKVDGNDAKTGNFGNPENPDRIRLDPAAVMVQAAFRGYLARRAFRTLKGIIRLQAVIRGHLVRRQAVATLCCTWGIVKLQALARGQKVRCSDIAMDIQEKHLRLLQGSKSSDSIGVSTSSKVKNLSNNVFVQKLLASSPSVLPLQLQYVPEEPNSSWQWLQRWTMSHFWLSPLKPVRSGKTKRSIQKMSNAKVVNGSSHSTLEHEKNKRGLRRVSGNSAADSVRKHPQNELERVKRSLRKLSDSSKEVSDKSEVFNEKTKKTLKKTSNSNNPDFSEQESSEKIRDVAATLSELSILEADMKMSSEDPSLGE…	GraIQD47	ATGGGAAAATCTCCAGCAAAATGGATCAAGACCTTACTTCTTGGGAAGAAATCTTCAAAGTCCAGTTTCTCAAAAGAAAAAGAGAAGCTGAAATCTGCAAATAAAGGTGAGGTTTTGGTTTCTTCCAAGGTGACTGTGTCTGACCTATCAGTGGATCCTCCATCAATTTCAGCACCTGTTCTAGTGAATAGCGCTAGGAATGTGGTGGACTCTGAGAAGGGTATACCTGCGCAATTGCCGAATGATGGGGCAAATATTCCATCTCCAAAAGTGGATGGAAATGATGCCAAAACTGGTAATTTTGGTAACCCAGAAAATCCTGATAGGATTAGGCTTGACCCAGCTGCTGTGATGGTACAGGCTGCTTTCAGAGGTTATCTGGCTCGCAGGGCATTTCGA…
Gorai.013G082900	Gorai.013G082900.1	GraIQD48	TTTAAATTCACTAAAAAAAAGCCTGCACGAGATTCTCTTGTTCGAGGAATCCTTCACGGTACAAAATTCAATGCTACAATTCTTTTTTGTTCTTACAATTACAGTTTTAATTTCTCTTATATATAAATAAATAAATAATATTAAGCTTGCAAAATAAAAGTTCTAAAATATAAACACGAAATTCGTTCTTCAGATCTCTGAATGCTCACAGTTTCGGTAATGGCAGCTTAGTACCGAACAAGGACTTCATATTTGATACTCTTTTCAGGCAAAAGCTTTTGATCCTCTCTTCTTTTTCACCATTTTCCAGTTCTGCCAACACGCTTGCTTTTACTTTTTTTTTCTTGATTTAGTTATATTATTTTTCATTTACTTGAGTAGATGTGGATTTTGGCTATG…	GraIQD48	MGKSPAKWIKTLLLGKKSSKSSFSKGKDKLNSANKGEVLVSSKVTVSDLSADSPSISAPILVSRARNVVDSEKGIPAQLPIDGENIPSLKMDGNNATTGNFGNPENPDRIRLDPAAVTVQAAFRGYLARREFRILKGIIRLQAVIRGHLVRRQAVATLCCTWGIVKLQALARGQKVRCSDIAMEIQEKHLRLLQSLKSSNSIGASISSTVKNLSSNVFVQKLLASSPSVLPLQLQYVPEEPNSSWQWLQRWTRSQFWEYPSKPIRSGKTKLSVQKLSFAKAVNGSSHSTLEYEKNKRGLRRISVNSAADSVREHPQNELERVKRNLRKLSNSSKEVTDKSEFVNEKTKKTLKKYSSSNGPDVLEQESAEKIRDVTATLSELSILEADLKFSSEHASLGE…	GraIQD48	ATGGGGAAATCTCCAGCGAAATGGATCAAGACCTTGCTTCTTGGGAAGAAATCTTCGAAATCCAGTTTCTCAAAAGGAAAAGATAAGCTGAATTCTGCAAATAAAGGTGAGGTTTTGGTTTCTTCCAAGGTAACTGTGTCTGACCTATCAGCGGATTCTCCATCGATTTCAGCACCTATTCTAGTGAGCCGTGCTAGGAATGTGGTGGACTCTGAGAAGGGTATACCTGCCCAATTGCCGATTGATGGGGAAAATATTCCATCTCTAAAAATGGATGGAAATAATGCCACAACCGGTAATTTTGGTAACCCAGAAAATCCTGATAGGATTAGGCTTGACCCAGCTGCTGTGACAGTACAGGCTGCTTTCAGAGGTTATCTGGCTCGCCGGGAATTTCGA…
Gorai.013G201400	Gorai.013G201400.1	GraIQD49	GGGGTGTGATCAGACATGGGAAAGGCAAGCAAATGGTTAGTAAACTTCTTGCTAGGGAGAAAAGATGATAAAGGAAAAAGGAAGAATTTGTCCATATCTTTTGATGAAGAGAATTTGGTTTCATCCCCGTCTGCAACTCCATCGTCCGCATCTTCGTTTAAGCGGAGATGGAGTTTTGGGAAGTTGTCGAGTAAAGATCGAGCTCATAAGAGTTCCCAGTCACTTGACTCAATGACTGCAACTCCACTTTTGAAGCAAGCTATATTCAATATGGGGATCCGGCATGATAATACGAGGGTTTTCACAATGGCCATGATGAATTCTAGCAGAAGGAAAACAAAAGCAAGATATGCAGCAGTGGAAAATGCGGCAGCGACCCAGATTCAAGCCGCTTTTCGT…	GraIQD49	MGKASKWLVNFLLGRKDDKGKRKNLSISFDEENLVSSPSATPSSASSFKRRWSFGKLSSKDRAHKSSQSLDSMTATPLLKQAIFNMGIRHDNTRVFTMAMMNSSRRKTKARYAAVENAAATQIQAAFRSYLARKALHALRGLVKLQAFVRGYLVRKQTTATLRSMHALMSIQVRARFQRIQMADQSQLDVKSQSLRYGRFLQEMEFKRSQREGINEKHGLVKSQNGLMNHSQMERIEQGIIKYYSGEIPILKRQQKHEESSFTTHNSPRHSPPMSKVTPARSSFSSHDYPYMPSYMANTQSSRAKLRSQSEPRQRPALNFKAKGKRITSAEEMDDDILPRYSFSQSKGIADEHQDPWIVKLYQSTITPKMDTSSYK	GraIQD49	ATGGGAAAGGCAAGCAAATGGTTAGTAAACTTCTTGCTAGGGAGAAAAGATGATAAAGGAAAAAGGAAGAATTTGTCCATATCTTTTGATGAAGAGAATTTGGTTTCATCCCCGTCTGCAACTCCATCGTCCGCATCTTCGTTTAAGCGGAGATGGAGTTTTGGGAAGTTGTCGAGTAAAGATCGAGCTCATAAGAGTTCCCAGTCACTTGACTCAATGACTGCAACTCCACTTTTGAAGCAAGCTATATTCAATATGGGGATCCGGCATGATAATACGAGGGTTTTCACAATGGCCATGATGAATTCTAGCAGAAGGAAAACAAAAGCAAGATATGCAGCAGTGGAAAATGCGGCAGCGACCCAGATTCAAGCCGCTTTTCGTTCGTATTTGGCAAGG…
Gorai.013G220500	Gorai.013G220500.1	GraIQD50	TGCTGTAACAAAGGGAACGTGTCCAGATATCAATAAAAAAATGAACAAGAATATTACAAATACTAGCAGATATGGTTTTGAGAGGCGGGATCAACATCAACCCGTTGGGTTGTTTTGAATTTCAAAATATTGAACCGCATTAGACCTTGTTAACCCAGACCTGCGTAGCACGGTTCTTCATTGTTATCCCAGATTTTTGTTTCAAGTTCTCACTCAATCTGCTCTGTTTTTTTTCTACGAAAAGAGCAAAATTTTCCCACAAATAAAAATCCTTCTTTTCTTACCAAGTTGCCTCCTTTGGAGCTAGTTTAGAGTAGAATTATTCCGTTTCTTTTCTTAAGCTCTGGGAAAATATATATACATTGAACTGTTGATGGGTTCTTCAGGGAAATGGGTGAA…	GraIQD50	MGSSGKWVKSLMGVKKNEKEDQEKMGVKSKKWKPWGSKGKFRSDSSPRTAAMAALARAPAKDFRVLRQEGAAIRIQTAFRGFLARRALRALKGIVRLQALVRGRQVRKQATVTLRCMQALIRVQARVRARRVRMSTEGRAVQKILDECHSKDDILKQAEDGWCDSKGTLEDVKTKLQMKQEGAFKRERALAYSLAQKQWRSKPGSTSQTNSSGLYTKYQEFDKNSWGWSWLERWMAARPWETRLMEPSRAPPSKHCLEGKNARSSSPCFVEVRKNNISTRISAKPPCIGQVTHSSSSPSTEFRFNPSSASSSICTYSTPVSGNTTLSSTDRTEQSGNSRPDYMNLTESTKAKQRSSNNHVHMSRPLYPNTNAGNRYV	GraIQD50	ATGGGTTCTTCAGGGAAATGGGTGAAATCTCTTATGGGTGTCAAGAAGAATGAAAAAGAAGACCAAGAAAAAATGGGTGTCAAGAGCAAGAAATGGAAGCCATGGGGCTCTAAAGGGAAGTTCAGATCAGATTCTTCACCAAGAACTGCTGCAATGGCAGCACTAGCCCGAGCTCCTGCTAAAGATTTCAGGGTTTTAAGGCAAGAAGGGGCTGCCATCCGCATCCAAACTGCTTTTCGTGGTTTCTTGGCAAGAAGAGCTTTGAGAGCTTTAAAAGGAATCGTGAGGCTTCAAGCATTAGTTCGCGGCCGACAGGTGAGGAAACAGGCCACCGTAACGCTTCGGTGCATGCAAGCTCTCATTCGTGTCCAAGCTCGTGTTAGGGCTCGTCGTGTGCGG…

## Sheet: Ath
Genome Wide Identification, Classification and Functional Characterization Analysis of IQD gene family in Diploid and Tetraploid Cotton (Gossypium) Abdul Rehman1,2,3, Zhen Peng2, Hongge Li2, Guangyong Qin1, Yinhua Jia2，Zhaoe Pan2，Shoupu He1,2, Abdul Qayyum3 and Xiongming Du1,2*, 1Zhengzhou Research Base, State Key Laboratory of Cotton Biology, Zhengzhou University, Zhengzhou 450000, China. 2State…
>AT1G14380.1	MGKTPGKWIKTLLLGKKSPKSNSDNRSQKLKSAKKEELVESVTEDLSNLTVDPPVVSSQPVPASTAQNVVSPINGDESKDNLESRNDLGEVELEQAAIKVQATFRAHQARRAFRTLKGIIRLQAVIRGHLVRRQAIATYSCIWGIVKFQALVRGQKARSSDIAIQFQKKHMEASDSEVLQSSTCSWMDNPTKFVFVDKLLASSPTALPLKIQYGPEEPNSAKVWLERWTQLQVWSSGSRVPRIEIPKSQSKKRNYQAVVEAEKKRPKRSIKKPSGTTSGTGPSRFTAERNKPKRNVRKASTLSKDPLRNESDKANHNSRKSRSGSKEGSPLEIKDEKPSPSLKRSSLSNGSKKATLRSAEKKKKDIPDSSVQIQPEGKVSENVLEGGDNIEFAEKEKDT…
>AT1G17480.1	MGGSGNWIRSLISNRKPVNDQQEKLSDKSSKKKWKLWRISSESLASSSFKSRGSYAASSLGSELPSFSADEAFTTAMAALIRAPPRDFLMVKREWASTRIQAAFRAFLARQAFRALKAVVRIQAIFRGRQVRKQAAVTLRCMQALVRVQSRVRAHRRAPSDSLELKDPVKQTEKGWCGSPRSIKEVKTKLQMKQEGAIKRERAMVYALTHQSRTCPSPSGRAITHHGLRKSSPGWNWYDDVGTFSRKSSESSVLSEYETVTVRKNNLSSTRVLARPPLLLPPVSSGMSYDSLHDETSTSSTSQSPVAFSSSVLDGGGYYRKPSYMSLTQSTQAKQRQSGLSCNGDARRSAGSDQCTDLYPPGNVWAKSQRS
>AT1G74690	MGKSTKWLKNVLLGKKTSKSSGSKDKERVVSGKEVLVTSKVEESDVVSDLPSFEVAETNTVDRSGGMLETQNVGPEEISDDEIELPEGKSTDSQNVAPVQDHSLSDAERIQREIAATSVQAAFRGYLARRAFWALKGIIRLQALIRGHLVRRQAVATLFSVMGIVRLQAFARGREIRKSDIGVQVYRKCRLQLLQGNKLANPTDAYLGIKKLTANAFAQKLLASSPKVLPVHAYDTSNPNSNLIWLENWSASCFWKPVPQPKKTISRKPQNRLLVEAESAKPKKSVRKVPASNFESSSVQTSFEFEKPKRSFRKVSSQSIEPPAVEDPQIELEKVKRSLRKVHNPVVESSIQPQRSPRKEVEKPKLGVEKTRESSYPLVHETAEEPVNVCDEKKKQEIS…
>AT1G72670.1	MGGSGNWIKSLITNKKNITDDQEKNIKKKWKLWRTSSEGLISSSKGFKSRGGSYGTPSLGSDPPSFSADDSFTAAVAAVIRAPPKDFFLVKREWAATRIQAAFRAFLARQALRALKAVVRIQAIFRGRQVRKQADVTLRCMQALVRVQARVRAHCNRGPSDGQELEKPSDQQKDDPAKQAEKGWCDSPGSINEVRTKLQMRQEGAIKRERAMVYALTHQPRTCPSPAKASKQGSVKKNNGSCKSSPGWNWLDRWVADRPWEGRLMEGPTNSSENARKSESSVSEHDTVQVRKNNLTTRVLARPPPMSSSATSSESSSTSQSPVPFSGSFLEEGGYYRKPSYMSLTQSIKAKQRRSGSSSSCSKTPFEKKQSMSYNGDVNVRRSAGSDPLNNQWTDLYPP…
>AT1G51960.1	MGRAARWFKGMFGTKKSKDRSHVSGGDSVKGGDHSGDFNVPRDSVLLGTILTDTEKDQNKNAIAVATATATAADAAVSAAVVRLTSEGRAGDIIITKEERWAAVKIQKVFRGSLARKALRALKGIVKLQALVRGYLVRKRAAAMLQSIQTLIRVQTAMRSKRINRSLNKEYNNMFQPRQSFDKFDEATFDDRRTKIVEKDDRYMRRSSSRSRSRQVHNVVSMSDYEGDFVYKGNDLELCFSDEKWKFATAQNTPRLLHHHSANNRYYVMQSPAKSVGGKALCDYESSVSTPGYMEKTKSFKAKVRSHSAPRQRSERQRLSLDEVMASKSSVSGVSMSHQHPPRHSCSCDPL
>AT1G18840	MGKPARWLKSVLLGKKPSKSSGSKDKERIVNGKEVVVISKIEESDVVSDLSSIGNAAVYTSGIVETQNLKHEDVSDDEIQVSEVQPTDSQDVASVPDDSLSESEKIQQEIAAVTVQAAYRGYLARRAFKILKGIIRLQALIRGHMVRRQAVSTLCCVMGIVRLQALARGREIRHSDIGVEVQRKCHLHHQPLENKANSVVDTHSYLGINKLTGNAFAQKLLASSPNVLPLSLDNDSSNSIWLENWSASCFWKPVPQPKKASLRKSQKKFASNPQIVEAEFARPKKSVRKVPSSNLDNSSVAQTSSELEKPKRSFRKVSTSQSVEPLPSMDNPQVDLEKVKRGLRKVHNPVVENSIQPQLVPQIAVEKPNGSLEESVNAFDEEKEDEVAETVVQQPEELI…
>AT1G19870.1	MGRSPASSCLRLISCSGGDDTSADPNSTALENKSSGDKRGWSFRKKSGKQRGLITSVVSETTPASRTRETLESALLKSPSPDNNNVSEKQQQSFSVDEKKSQLPVVTYVAEPVDEKKTQSVIEEKTELLSVEEQIDHRTEVSPVIVESKGTETEEDDLIGTELQGPSAADAAKIEEDVTSEVEMASKVEPEESESDDVIIVRKESDEKVDEKLDESVIVVIQAAVRGFLARRELLRSKKVIKLQAAVRGHLVRSQAMGSLRCVQAIVKMQAMVRARHSTKDGSRVSATSDKSEPNAAAQKLLENKFAKHLMESTPKTKPINIKCDPTKPSSAWNWLERWMSVPKPEKTSKANLTTEEQNLEETQNVKISPQADFVNSDSTVENKTETDMPSYEASKVEG…
>AT2G43680.1	MVKKGSWFSAIKRVFTPHSKEKLANQEPERKSGKEKKKKGFGKLRHGETNSFLPIFREPSSIEKILGEAERDHNLVFRPPTPDRPNPYSASPPPRPASPRVASPRPTSPRVASPRVPSPRAEVPRTLSPKPPSPRAEVPRSLSPKPPSPRADLPRSLSPKPFDRSKPSSASANAPPTLRPASTRVPSQRITPHSVPSPRPSSPRGASPQAISSKPPSPRAEPPTLDTPRPPSPRAASLRADPPRLDAARPTTPRPPSPLADAPRLDAPRPTTPKPPSPRSDPPRLDAPRPTTPKPPSPRSVSPRAVQRREIVYRPEPTLPVQHASATKIQGAFRGYMARKSFRALKGLVRLQGVVRGYSVKRQTINAMKYMQQVVRVQSQIQSRRIKMLENQAQVEKDE…
>AT2G33990.1	MGSGNLIKAIIRLKKSKQGTEKKKTSAVKPKKGSKKKGTSLVTRSEDWAATRIQTAFKAYKARKSLRRLKGIARAKLSTEKQSVKNQAVVTLRYLHSWSKIQSEIKARRVCMVTEWRLKNKRLEHQQKLEAKLHDVEVEWNGGSETKDEILERILQREEATIKRERALAYAFSHQWKADGKTQWLGSYELGNTNWGWSWKERWISARPWEVRYSVTPKKPKSSKTDSNSPAKRTVSLSSVPAKTPFPGARNTVKPRRLSFPGA
>AT2G26180.1	MGASGKWVKSIIGLKKLEKDEIEKGNGKNKKWKLWRTTSVDSWKGFRGKHRSDSDGVDSSTVYSAAVATVLRAPPKDFKAVREEWAAIRIQTAFRGFLARRALRALKGIVRLQALVRGRQVRKQAAVTLRCMQALVRVQARVRARRVRMTVEGQAVQKLLDEHRTKSDLLKEVEEGWCDRKGTVDDIKSKLQQRQEGAFKRERALAYALAQKQWRSTTSSNLKTNSSISYLKSQEFDKNSWGWSWLERWMAARPWETRLMDTVDTAATPPPLPHKHLKSPETADVVQVRRNNVTTRVSAKPPPHMLSSSPGYEFNESSGSSSICTSTTPVSGKTGLVSDNSSSQAKKHKPSYMSLTESTKAKRRTNRGLRQSMDEFQFMKNSGMFTGELKTSPSSDPFV…
>AT2G02790.1	MGKTPSPGKWIKSLLGKKSSKSSLEKGGEKLRSAKKEELVVKVKDNNVSKLPTEPPVVSSQEVAATQTVVVPDVVIAEKQLSGDIEGDESSNVNLESGNDSEEVKLEEAATKVQAALRAQQAREESQNLKGITRVQAVIRGHLVRRQAVATYSCIWGIVKVQALVRGKKARSSETVAQLQKTNTETETSETLQGSTYSWMENPTKLSMIDKLLVSSPTTLPLKIQYSPEDPNSAKVWLGRWTQLQVWAPGPLVVKNLVPKSQTKKRSFQAVEAEKGKLKRGVRKPTGVSTTANSSTSRSTADNEKPKRTVRKASTLGKELSKIENDKSKQSSRKSTSAIKEGSSVEVKDEKPRISHKKASLSNGIGKATRKSAEKKKEIADAVQKELPIEEVSVSLVDA…
>AT2G26410.1	MGKNWLTCVSVACLSPGKDKKNQKPEKPKRKWSFGKQKSRESFDFPLEETPPVDPSPSSVHRPYPPPPPLPDFAPQPLLPPPSPPPPPPAYTINTRIYGESKESKNRQALALASAVAAEAAVVAAHAAAEVIRLTTPSTPQIEESKEETAAIKIQNAYRCYTARRTLRALRGMARLKSLLQGKYVKRQMNAMLSSMQTLTRLQTQIQERRNRLSAENKTRHRLIQQKGHQKENHQNLVTAGNFDSSNKSKEQIVARSVNRKEASVRRERALAYAYSHQQTWRNSSKLPHQTLMDTNTTDWGWSWLERWMASRPWDAESIDDQVSVKSSLKRENSIKSSPARSKTQKSASQSSIQWPVNNDTKSRKIEVTNRRHSIGGGSSENAKDDESVGSSSSRRNSL…
>AT3G09710.2	MVKKAKWLKNVKKAFSPDSKKLKHESVECQDSVISYPVLIATSRSSSPQFEVRVDEVNYEQKKNLYPPSSDSVTATVAHVLVDSPPSSPESVHQAIVVNRFAGKSKEEAAAILIQSTFRGHLARRESQVMRGQERLKLLMEGSVVQRQAAITLKCMQTLSRVQSQIRSRRIRMSEENQARHKQLLQKHAKELGGLKLFMRLFKFIVVSSDNGGNWNYSNQSKEQVEAGMLHKYEATMRRERALAYAFTHQQNLKSFSKTANPMFMDPSNPTWGWSWLERWMAGRPWESSEKEQNTTNNDNSSVKNSTNRNSQGGETAKSSNRNKLNSSTKPNTPSASSTATRNPRKKRPIPSSIKSKSSDDEAKSSERNRRPSIARPSVSDDETLSSSTARRSSNLIPT…
>AT3G51380.1	MANSKRLFGVVRRKLLRRSQSRITIIRSSAPETTREEIAAVKIQAFFRGHLARRAFKALKSLVKLQAVARGVLVRRQARIALHCMHALARLQVRVRARQLLSH
>AT3G49260.3	MGKKGSGGWFSTVKKKVFKSSPKDSKRENNIGSNNADIWQQQHDTQEVVSFEHFPAESSPEISHDVESTASTPATNVGDRKHAMAVAIATAAAAEAAVAAAQAAAKVVRLAGYNRQTEEDSAAVLIQSHYRGYLARRALRALKGLVRLQALVRGNHVRKQAQMTMKCMQALVRVQGRVRARRLQVAHDRFKKQFEEEEKRSGMEKPNKVGFANLKTEREKPKKLHEVNRTSLYQTQGKEKERSEGMMKRERALAYAYTYQRQMQHTNSEEGIGLSSNGPDRNQWAWNWLDHWMSSQPYTGRQTGPGPGPGQYNPPPYPPFPTAAATTTSDDVSEKTVEMDVTTPTSLKGNIIGLIDREYIDLGSYRQGHKQRKSPTHIPSYMAPTASAKAKVRDQGPTV…
>AT3G49380.1	MGKTDGSSWFTAVKNVFRSPEKLIPRRINRRQDNDLVEEVEDELHQRPKRRKRRWLFKKVSSDPCAINVGINTTSTAINAIAAEETEKTVSPAAKETVFFCRTSVYLKRHVAAILIQTAFRGCLARTAVRALKGVVKLQALVRGHNVRRRTSITLQRVQALVRIQALALDHRKKLTTKLGDEISYSHAFSKQMWRTMEREAHSESELEDKRPSRLNGYGYQETGRRMSTDQAIVEPVKIVEIDKYNNTYSHHQQLNDQTPRGNSFVTRQAHSIPNYMSTTASTVARFRRPQSVPKQRSNRTCLDNNEPRLRLVRKRLSFHNDNPQSYGYIAGDGYFWYDIDKRTNAHEDFQY
>AT3G15050.1	MGSGWLLRSIICLNGTKKNKSNRGNVHSETSNRVKPVESSSAASTKLTVEVAVIRIQKAFRAFKARKRLCSLKSARRFNSLIQGHTVMNQTSTALNVIHSWYDIQNQIRARRLYMVTQGRLQHKRLENRLKLEIKLHELEVEWCGGSETMEEILAKIQQKEEATVKRERAMAYAFSHQWRANATQYLGQASFNLGKESWGWSWKERWIAARPWEIRAQCYVVKPIKPSKKPEKSSPNNVITKTSAKPDEVGNSKKPGSG
>AT3G16490.1	MGRAARWFKGIFGMKKSKEKENCVSGDVGGEAGGSNIHRKVLQADSVWLRTYLAETDKEQNKHAIAVAAATAAAADAAVAAAQAAVAVVRLTSNGRSGGYSGNAMERWAAVKIQSVFKGYLARKALRALKGLVKLQALVRGYLVRKRAAETLHSMQALIRAQTSVRSQRINRNNMFHPRHSLERLDDSRSEIHSKRISISVEKQSNHNNNAYDETSPKIVEIDTYKTKSRSKRMNVAVSECGDDFIYQAKDFEWSFPGEKCKFPTAQNTPRFSSSMANNNYYYTPPSPAKSVCRDACFRPSYPGLMTPSYMANTQSFKAKVRSHSAPRQRPDRKRLSLDEIMAARSSVSGVRMVQPQPQPQTQTQQQKRSPCSYDHQFRQNETDFRFYN
>AT3G22190.1	MGASGRWIKALVGFTKSDKSRSSKKDENVKVATKSRFGRKNSVDFDFEKFQDGFEDSNTRSMVDTGVSTSTSLQSYGGVAYDEQSRENRAATRIQTAYRGFLARRALRALKGLVRLQALVRGHAVRKQAAVTLRCMQALVRVQARVRARRVRLALELESETSQQTLQQQLADEARVREIEEGWCDSIGSVEQIQAKLLKRQEAAAKRERAMAYALTHQWQAGTRLLSAHSGFQPDKNNWGWNWLERWMAVRPWENRFLDSNLRDDAKLGENGMEQSENVPKTQIKSVSKMPNTSNLVSGVSSQMTGPCQSDGDSSSPGISSSIPVVSKAKSKPAKDDLAVEVNSRPGAGPRSHSNPKERSREPNRSSKERLSLPNSGKSLGSQSTKANRAGKLTPASQK…
>AT3G59690.1	MGKKGSWFSAIKRVFTPHSKEKQLSNNNQEPEIKSENKEKKKKGFGKKLRNGETNSFLPIFRQPSSIEKILSEAEREHNLVFRPPTPTDRANSSSTSVASPLVRPASPKVPSQRYVSSPKPISPRVAYPQVHYPKPPSPKPPSPRAVSPRIVQRREFVHRPEPSLLVKNAYAIKIQAAFRGYMARRSFRALKGLVRLQGVVRGHSVKRQTMNAMKYMQLLVRVQTQVQSRRIQMLENRARNDKDDTKLVSSRMSDDWDDSVLTKEEKDVRLHRKIDAMIKRERSMAYAYSHQLWKNSPKSAQDIRTSGFPLWWNWVDRQKNQNQPFRLTPTRPSLSPQPQSSNQNHFRLNNSFDTSTPNSSKSTFVTPSRPIHTPQPYSSSVSRYSRGGGRATQDSPFK…
>AT3G52290.1	MGKSWFSAVKKALSPEPKQKKEQKPHKSKKWFGKSKKLDVTNSGAAYSPRTVKDAKLKEIEEQQSRHAYSVAIATAAAAEAAVAAAQAAAEVVRLSALSRFPGKSMEEIAAIKIQTAFRGYMARRALRALRGLVRLKSLVQGKCVRRQATSTLQSMQTLARVQYQIRERRLRLSEDKQALTRQLQQKHNKDFDKTGENWNDSTLSREKVEANMLNKQVATMRREKALAYAFSHQNTWKNSTKMGSQTFMDPNNPHWGWSWLERWMAARPNENHSLTPDNAEKDSSARSVASRAMSEMIPRGKNLSPRGKTPNSRRGSSPRVRQVPSEDSNSIVSFQSEQPCNRRHSTCGSIPSTRDDESFTSSFSQSVPGYMAPTQAAKARARFSNLSPLSSEKTAKKR…
>AT4G29150.1	MRKNLTKLTRVKRETKMGRATRWFKGLFGIKPSSCSGTDSGTISNRLDRSLCDSYETIPPNISEKEAAWLRSFYAAGEEEKERRTHAIAVAAATAAAADAAVAAAKAAAAVVRLQGQGKSGPLGGGKSREHRAAMQIQCAFRGYLARKALRALRGVVKIQALVRGFLVRNQAAATLRSMEALVRAQKTVKIQRALRRNGNAAPARKSTERFSGSLENRNNGEETAKIVEVDTGTRPGTYRIRAPVLSGSDFLDNPFRRTLSSPLSGRVPPRLSMPKPEWEECSSKFPTAQSTPRFSGGSPARSVCCSGGGVEAEVDTEADANRFCFLSGEFNSGYMADTTSFRAKLRSHSAPRQRPESNASAGGWRRSIGGGGVRMQRQSCSGVREAVVGNIERRRMRW
>AT4G23060.1	MGKASRWFRSLFGVKKPDPGYPDLSVETPSRSTSSNLKRRWSFVKSKREKESTPINQVPHTPSLPNSTPPPPSHHQSSPRRRRKQKPMWEDEGSEDSDKHAIAVAAATAAVAEAAVAAANAAAAVVRLTSTSGRSTRSPVKARFSDGFDDVVAHGSKFYGHGRDSCELAVIKIQSIFRGYLAKRALRALKGLVRLQAIVRGHIERKRMSVHLRRMHALVRAQARVRATRVIVTPESSSSQSNNTKSSHFQNPGPPTPEKLEHSISSRSSKLAHSHLFKRNGSKASDNNRLYPAHRETFSATDEEEKILQIDRKHISSYTRRNRPDMFYSSHLILDNAGLSEPVFATPFSPSSSHEEITSQFCTAENSPQLYSATSRSKRSAFTASSIAPSDCTKSCCDG…
>AT4G14750.1	MGKTSKWFRSLLTGKKERTKEHIIQSECVFTSSIPGTPKEKRRWSFRRSSATGPPPPACAITLKDSPPPPPPPPPPPPLQQPFVVEIVDNEDEQIKNVSAEEIEEFAAIKIQACYRSHLARKALRALKGLVKLQALVRGHLVRKQATATLRCMQALITLQAKAREQRIRMIGGDSTNPRTSIHKTRINNFYHENEENIKIVEMDIQSKMYSPAPSALTEMSPRAYSSHFEDCNSFNTAQSSPQCFSRFKEYYNGDTLSSYDYPLFPNYMANTQSSKAKARSQSAPKQRPPEIYEKQMSGRRRSSMEAPRNNGVPRAVRMQRSSSQLGSNTAKESQQHHHHQYYPWMAIKLDRSNISLMESECGSTSTVMTNTNYGRHVDVQGNNNMY
>AT4G00820.1	MGKKSGSSSSWLTAVKRAFRSPTKKEHNNNAHGNEVDEDEDKKKEKRRWLFRKSTNHDSPVKTSGVGKDAPAQKSTETTTIINPTVLSSVTEQRYDASTPPATVSAASETHPPSTTKELPNLTRRTYTAREDYAAVVIQTGFRGYLARRALRALKGLVKLQALVRGHNVRKQAKMTLRCMQALVRVQSRVLDQRKRLSHDGSRKSAFSDTQSVLESRYLQEISDRRSMSREGSSIAEDWDDRPHTIEEVKAMLQQRRDNALRRESNNSISQAFSHQVRRTRGSYSTGDEYEEERPKWLDRWMASKPWDKRASTDQRVPPVYKTVEIDTSQPYLTRGNSRTGASPSRSQRPSSPSRTSHHYQQHNFSSATPSPAKSRPIQIRSASPRIQRDDRSAYNYTS…
>AT4G10640.1	MAKKNGTSWFTAVKKILWSPSKDSDKKTHHHKETDIKRKEKKGWIFRKTKLETTNSVLQHTVRTVEAEEKEKPPVIVSSVEEGVTEIVKLTATPGFIRRHWAAIIIQTAFRGYLSRRALRALKGIVKLQALVRGNNVRNQAKLTLRCIKALVRVQDQVLNHHQQQRSRVLLSPPSRNYNIEARRNSMFAESNGFWDTKTYLQDIRSRRSLSRDMNRCNNEFYSEETELILQKKLEIAIKREKAQALALSNQIRSRSSRNQSAGDDRELLERTQWLDRWMATKQWDDTITNSTNVRDPIKTLEAVTTHHHQRSYPATPPSCRASRSVMVRSASPRIPCSPSSMQPNYMSATESAKAKARTQSTPRRRPMTAKKRLCYAEEESLRSPSFKSCLWGDHESDY…
>AT5G03040.1	MGKKAKWFSSVKKAFSPDSKKSKQKLAEGQNGVISNPPVVDNVRQSSSSPPPALAPREVRVAEVIVERNRDLSPPSTADAVNVTATDVPVVPSSSAPGVVRRATPTRFAGKSNEEAAAILIQTIFRGYLARRALRAMRGLVRLKLLMEGSVVKRQAANTLKCMQTLSRVQSQIRARRIRMSEENQARQKQLLQKHAKELAGLKNGDNWNDSIQSKEKVEANLLSKYEATMRRERALAYSYSHQQNWKNNSKSGNPMFMDPSNPTWGWSWLERWMAGRPLESSEKEQSNSNNDNAASVKGSINRNEAAKSLTRNGSTQPNTPSSARGTPRNKNSFFSPPTPSRLNQSSRKSNDDDSKSTISVLSERNRRHSIAGSSVRDDESLAGSPALPSYMVPTKSAR…
>AT5G03960.1	MAKRRSWFGWMKRLFICEAKARAEKPRRLRWVFKRLKLRPQLATCGQETRTLNEATQDQRKHAMNVAIATAAAAEAAVAAAKAAAEVVRMAGNAFTSQHFVKKLAPNVAAIKIQSAFRASLARKALRALKALVRLQAIVRGRAVRRKVSALLKSSHSNKASTSNIIQRQTERKHWSNTKSEIKEELQVSNHSLCNSKVKCNGWDSSALTKEDIKAIWLRKQEGVIKRDRMLKYSRSQRERRSPHMLVESLYAKDMGMRSCRLEHWGESKSAKSINSFLIPSEMLVPTKVKLRSLQRQDSGDGQDSPFSFPRRSFSRLEQSILEDESWFQRSNGFQPYMSVTESAREKMRSLSTPRQRVGIMDSLFDNYKKDGDKVSLWSTFVCENSKINNAKKSSLTTY…
>AT5G62070.1	MGFFGRLFGSKKKSDKAASSRDKRRWSFTTRSSNSSKRAPAVTSASVVEQNGLDADKHAIAVAAATAAVAEAALTAAHAAAEVVRLTSGNGGRNVGGGGNSSVFQIGRSNRRWAQENIAAMKIQSAFRGYLARRALRALKALVKLQALVRGHIVRKQTADMLRRMQTLVRLQSQARARASRSSHSSASFHSSTALLFPSSSSSPRSLHTRCVSNAEVSSLDHRGGSKRLDWQAEESENGDKILEVDTWKPHYHPKPLRSERNNESPRKRQQSLLGPRSTENSPQVGSSGSRRRTPFTPTSRSEYSWGCNNYYYSGYHPNYMANTESYKAKVRSQSAPKQRVEVSNETSGYKRSVQGQYYYYTAVEEESLDVGSAGYYGGGGGDSDRLNRNQSAKSRMHS…
>AT5G35670.1	MGVTGGLVRSIFFRNKSFGAHDYNNGRGNLGEKKRWSSVRSYLCGDEFNSVRAVNDSESIKDSEALLTMSQQLSSEFGMPFGSVIAIEDSASVRHLEDEDSGSVKSSEATVTQPLLEEKSKGLDCYLKEEDVEDNQSEATETHIPKKHQTTPISKLFLEEDAAVIIQSAFRSYLAIRRSKEEEETFAKEESFSGEESQDNASMGTSLEAQTGNSVKAPFFRRKRVSANRRTLQKNNTQVLRIKEDWDDSTVSSTISKSRIQSRVEAMTKRERALAYAFSQQLRICSKKKQIDRSSEDDSNIGWSWLERWMATRVPDSIPIEPRTDVATKNQSLIRKNRAFGTAGELESCASNDLPLHFESISETQGDATTVLQTEKSSFKPSISKRKSVPSYKSQRKHH…
>AT5G13460.1	MAKKKGLFTVLKRIFISEVNSEKKEKRRKWTFWKLRIKKRLPSITAPPEHRTSHESHEEQKEEIVSDVGEISQVSCSRQLDSIEESKGSTSPETADLVVQYQMFLNRQEEVLAATRIQTAFRGHLARKALRALKGIVKLQAYIRGRAVRRQAMTTLKCLQSVVNIQSQVCGKRTQIPGGVHRDYEESNIFNDNILKVDTNGQKRWDDSLLTKEEKEAVVMSKKEASLRRERIKEYAVTHRKSAESYQKRSNTKWKYWLDEWVDTQLTKSKELEDLDFSSKTKPKDETLNEKQLKTPRNSSPRRLVNNHRRQVSIGEDEQSPAAVTITTPTYMVATESAKAKSRSLSSPRIRPRSFDTQSESYSPYKNKLCLTTSMMSEAPSKVRIANNGSNTRPSAYQQ…
>AT5G07240.1	MGFFGRLFGSKKQEKATPNRRRWSFATRSSHPENDSSSHSSKRRGDEDVLNGDKHAIAVAAATAAVAEAALAAARAAAEVVRLTNGGRNSSVKQISRSNRRWSQEYKAAMKIQSAFRGYLARRALRALKALVKLQALVKGHIVRKQTADMLRRMQTLVRLQARARASRSSHVSDSSHPPTLMIPSSPQSFHARCVSEAEYSKVIAMDHHHNNHRSPMGSSRLLDQWRTEESLWSAPKYNEDDDKILEVDTWKPHFRESPRKRGSLVVPTSVENSPQLRSRTGSSSGGSRRKTPFTPARSEYEYYSGYHPNYMANTESYKAKVRSQSAPRQRLQDLPSESGYKRSIQGQYYYYTPAAERSFDQRSDNGIAGYRGVSDGLDRNQSDKSKMYTSFFSSNPLF…
>AT1G01110.2	MGKKNGSSSWLTAVKRAFRSPTKKDHSNDVEEDEEKKREKRRWFRKPATQESPVKSSGISPPAPQEDSLNVNSKPSPETAPSYATTTPPSNAGKPPSAVVPIATSASKTLAPRRIYYARENYAAVVIQTSFRGYLARRALRALKGLVKLQALVRGHNVRKQAKMTLRCMQALVRVQSRVLDQRKRLSHDGSRKSAFSDSHAVFESRYLQDLSDRQSMSREGSSAAEDWDDRPHTIDAVKVMLQRRRDTALRHDKTNLSQAFSQKMWRTVGNQSTEGHHEVELEEERPKWLDRWMATRPWDKRASSRASVDQRVSVKTVEIDTSQPYSRTGAGSPSRGQRPSSPSRTSHHYQSRNNFSATPSPAKSRPILIRSASPRCQRDPREDRDRAAYSYTSNTPSL…
