# Supplementary material for: Genome Wide Identification, Classification and Functional Characterization&nbsp;of IQD Gene Family in Diploid and Tetraploid Cotton (Gossypium)
Source: Research Square preprint supplement (doi:10.21203/rs.3.rs-166037/v1), 2021-02-08
Supplement: Supplementary file 3 [file e09e911062b9ad38d04cce12.xlsx]

## Sheet: Gar-Motif Info
Genome Wide Identification, Classification and Functional Characterization Analysis of IQD gene family in Diploid and Tetraploid Cotton (Gossypium) Abdul Rehman1,2,3, Zhen Peng2, Hongge Li2, Guangyong Qin1, Yinhua Jia2，Zhaoe Pan2，Shoupu He1,2, Abdul Qayyum3 and Xiongming Du1,2*, 1Zhengzhou Research Base, State Key Laboratory of Cotton Biology, Zhengzhou University, Zhengzhou 450000, China. 2State…
GarIQD10	1	30	Motif-5
GarIQD10	58	106	Motif-3
GarIQD10	112	160	Motif-0
GarIQD10	161	185	Motif-6
GarIQD10	198	237	Motif-2
GarIQD10	249	281	Motif-4
GarIQD10	344	388	Motif-11
GarIQD10	389	419	Motif-1
GarIQD10	430	454	Motif-8
GarIQD08	1	30	Motif-5
GarIQD08	64	100	Motif-3
GarIQD08	121	169	Motif-0
GarIQD08	170	194	Motif-6
GarIQD08	205	245	Motif-2
GarIQD08	256	288	Motif-4
GarIQD08	348	392	Motif-11
GarIQD08	393	427	Motif-1
GarIQD08	438	462	Motif-8
GarIQD32	1	29	Motif-5
GarIQD32	54	84	Motif-3
GarIQD32	110	158	Motif-0
GarIQD32	159	183	Motif-6
GarIQD32	194	234	Motif-2
GarIQD32	245	277	Motif-4
GarIQD32	337	381	Motif-11
GarIQD32	382	416	Motif-1
GarIQD32	426	449	Motif-8
GarIQD06	1	30	Motif-5
GarIQD06	55	88	Motif-3
GarIQD06	110	158	Motif-0
GarIQD06	159	183	Motif-6
GarIQD06	194	234	Motif-2
GarIQD06	245	276	Motif-4
GarIQD06	335	379	Motif-11
GarIQD06	380	414	Motif-1
GarIQD06	424	448	Motif-8
GarIQD09	1	30	Motif-5
GarIQD09	51	86	Motif-3
GarIQD09	102	150	Motif-0
GarIQD09	151	175	Motif-6
GarIQD09	186	226	Motif-2
GarIQD09	237	269	Motif-4
GarIQD09	318	362	Motif-11
GarIQD09	363	397	Motif-1
GarIQD09	407	431	Motif-8
GarIQD22	1	30	Motif-5
GarIQD22	68	116	Motif-3
GarIQD22	125	173	Motif-0
GarIQD22	174	197	Motif-6
GarIQD22	214	246	Motif-7
GarIQD22	270	297	Motif-10
GarIQD22	315	348	Motif-1
GarIQD22	351	375	Motif-8
GarIQD19	1	28	Motif-5
GarIQD19	33	54	Motif-8
GarIQD19	140	186	Motif-0
GarIQD19	189	211	Motif-6
GarIQD19	239	270	Motif-4
GarIQD19	277	301	Motif-11
GarIQD19	385	498	Motif-9
GarIQD19	588	622	Motif-1
GarIQD19	629	653	Motif-8
GarIQD12	1	28	Motif-5
GarIQD12	55	103	Motif-3
GarIQD12	111	159	Motif-0
GarIQD12	160	182	Motif-6
GarIQD12	212	244	Motif-7
GarIQD12	273	300	Motif-10
GarIQD12	311	345	Motif-1
GarIQD12	347	371	Motif-8
GarIQD02	1	30	Motif-5
GarIQD02	32	54	Motif-8
GarIQD02	181	228	Motif-0
GarIQD02	230	249	Motif-6
GarIQD02	297	327	Motif-4
GarIQD02	522	635	Motif-9
GarIQD02	739	773	Motif-1
GarIQD02	780	804	Motif-8
GarIQD17	1	30	Motif-5
GarIQD17	155	202	Motif-0
GarIQD17	271	302	Motif-4
GarIQD17	590	703	Motif-9
GarIQD17	813	847	Motif-1
GarIQD17	854	878	Motif-8
GarIQD44	3	32	Motif-5
GarIQD44	58	105	Motif-3
GarIQD44	109	157	Motif-0
GarIQD44	158	181	Motif-6
GarIQD44	205	245	Motif-2
GarIQD44	246	273	Motif-4
GarIQD44	279	311	Motif-7
GarIQD44	384	418	Motif-1
GarIQD44	427	451	Motif-8
GarIQD14	1	30	Motif-5
GarIQD14	33	56	Motif-8
GarIQD14	71	119	Motif-3
GarIQD14	127	175	Motif-0
GarIQD14	176	200	Motif-6
GarIQD14	228	260	Motif-7
GarIQD14	289	316	Motif-10
GarIQD14	331	364	Motif-1
GarIQD14	367	391	Motif-8
GarIQD05	1	29	Motif-5
GarIQD05	31	52	Motif-8
GarIQD05	66	113	Motif-3
GarIQD05	122	170	Motif-0
GarIQD05	171	195	Motif-6
GarIQD05	212	244	Motif-7
GarIQD05	273	300	Motif-10
GarIQD05	314	348	Motif-1
GarIQD05	351	375	Motif-8
GarIQD28	1	30	Motif-5
GarIQD28	70	118	Motif-3
GarIQD28	124	168	Motif-0
GarIQD28	190	222	Motif-7
GarIQD28	250	277	Motif-10
GarIQD28	292	326	Motif-1
GarIQD28	328	352	Motif-8
GarIQD43	3	31	Motif-5
GarIQD43	83	128	Motif-3
GarIQD43	139	187	Motif-0
GarIQD43	188	208	Motif-6
GarIQD43	239	278	Motif-2
GarIQD43	286	316	Motif-4
GarIQD43	319	351	Motif-7
GarIQD43	403	436	Motif-1
GarIQD43	447	471	Motif-8
GarIQD42	2	30	Motif-5
GarIQD42	63	110	Motif-3
GarIQD42	114	162	Motif-0
GarIQD42	163	186	Motif-6
GarIQD42	207	246	Motif-2
GarIQD42	266	298	Motif-4
GarIQD42	341	375	Motif-1
GarIQD46	1	29	Motif-5
GarIQD46	116	164	Motif-0
GarIQD46	165	189	Motif-6
GarIQD46	231	262	Motif-4
GarIQD46	303	416	Motif-9
GarIQD46	451	485	Motif-1
GarIQD46	491	511	Motif-8
GarIQD47	1	29	Motif-5
GarIQD47	114	162	Motif-0
GarIQD47	163	187	Motif-6
GarIQD47	229	261	Motif-4
GarIQD47	301	414	Motif-9
GarIQD47	452	485	Motif-1
GarIQD47	492	511	Motif-8
GarIQD39	3	32	Motif-5
GarIQD39	75	109	Motif-3
GarIQD39	127	175	Motif-0
GarIQD39	176	198	Motif-6
GarIQD39	226	265	Motif-2
GarIQD39	273	304	Motif-4
GarIQD39	306	338	Motif-7
GarIQD39	415	449	Motif-1
GarIQD39	458	482	Motif-8
GarIQD03	1	28	Motif-5
GarIQD03	32	53	Motif-8
GarIQD03	76	124	Motif-3
GarIQD03	144	192	Motif-0
GarIQD03	193	215	Motif-6
GarIQD03	286	318	Motif-7
GarIQD03	358	380	Motif-7
GarIQD03	400	434	Motif-1
GarIQD26	3	32	Motif-5
GarIQD26	87	135	Motif-3
GarIQD26	138	186	Motif-0
GarIQD26	187	210	Motif-6
GarIQD26	240	280	Motif-2
GarIQD26	286	313	Motif-4
GarIQD26	400	433	Motif-1
GarIQD26	444	468	Motif-8
GarIQD27	1	29	Motif-5
GarIQD27	70	118	Motif-3
GarIQD27	135	183	Motif-0
GarIQD27	184	205	Motif-6
GarIQD27	246	272	Motif-4
GarIQD27	283	315	Motif-7
GarIQD27	346	363	Motif-10
GarIQD27	392	426	Motif-1
GarIQD24	2	30	Motif-5
GarIQD24	61	109	Motif-3
GarIQD24	112	160	Motif-0
GarIQD24	161	182	Motif-6
GarIQD24	205	229	Motif-2
GarIQD24	267	299	Motif-4
GarIQD24	339	372	Motif-1
GarIQD24	382	403	Motif-8
GarIQD25	19	43	Motif-8
GarIQD25	46	94	Motif-3
GarIQD25	105	153	Motif-0
GarIQD25	154	175	Motif-6
GarIQD25	190	215	Motif-4
GarIQD25	228	260	Motif-7
GarIQD25	347	381	Motif-1
GarIQD13	1	30	Motif-5
GarIQD13	97	145	Motif-0
GarIQD13	146	168	Motif-6
GarIQD13	181	221	Motif-2
GarIQD13	231	263	Motif-4
GarIQD13	374	398	Motif-8
GarIQD33	19	42	Motif-8
GarIQD33	48	96	Motif-3
GarIQD33	106	154	Motif-0
GarIQD33	155	177	Motif-6
GarIQD33	218	247	Motif-4
GarIQD33	256	288	Motif-7
GarIQD33	374	408	Motif-1
GarIQD30	1	30	Motif-5
GarIQD30	98	146	Motif-0
GarIQD30	147	170	Motif-6
GarIQD30	182	222	Motif-2
GarIQD30	232	264	Motif-4
GarIQD30	375	399	Motif-8
GarIQD07	1	30	Motif-5
GarIQD07	163	211	Motif-0
GarIQD07	212	236	Motif-6
GarIQD07	253	293	Motif-2
GarIQD07	305	334	Motif-4
GarIQD07	429	463	Motif-1
GarIQD07	469	493	Motif-8
GarIQD29	1	28	Motif-5
GarIQD29	71	119	Motif-0
GarIQD29	120	144	Motif-6
GarIQD29	155	195	Motif-2
GarIQD29	213	245	Motif-4
GarIQD29	332	366	Motif-1
GarIQD50	1	30	Motif-5
GarIQD50	72	120	Motif-0
GarIQD50	121	145	Motif-6
GarIQD50	156	196	Motif-2
GarIQD50	214	245	Motif-4
GarIQD50	337	369	Motif-1
GarIQD37	1	30	Motif-5
GarIQD37	141	189	Motif-0
GarIQD37	190	213	Motif-6
GarIQD37	234	274	Motif-2
GarIQD37	283	314	Motif-4
GarIQD37	402	436	Motif-1
GarIQD37	443	467	Motif-8
GarIQD23	1	30	Motif-5
GarIQD23	116	164	Motif-0
GarIQD23	165	189	Motif-6
GarIQD23	232	264	Motif-4
GarIQD23	272	296	Motif-7
GarIQD23	390	501	Motif-9
GarIQD23	554	588	Motif-1
GarIQD35	1	30	Motif-5
GarIQD35	158	206	Motif-0
GarIQD35	207	231	Motif-6
GarIQD35	246	286	Motif-2
GarIQD35	292	320	Motif-4
GarIQD35	405	439	Motif-1
GarIQD35	445	468	Motif-8
GarIQD31	1	30	Motif-5
GarIQD31	53	101	Motif-3
GarIQD31	110	157	Motif-0
GarIQD31	203	241	Motif-2
GarIQD31	329	363	Motif-1
GarIQD45	1	29	Motif-5
GarIQD45	55	103	Motif-3
GarIQD45	112	159	Motif-0
GarIQD45	198	238	Motif-2
GarIQD45	320	354	Motif-1
GarIQD20	1	29	Motif-5
GarIQD20	43	90	Motif-3
GarIQD20	107	155	Motif-0
GarIQD20	156	179	Motif-6
GarIQD20	194	233	Motif-2
GarIQD20	326	360	Motif-1
GarIQD18	1	30	Motif-5
GarIQD18	68	116	Motif-3
GarIQD18	119	164	Motif-0
GarIQD18	168	191	Motif-6
GarIQD18	205	244	Motif-2
GarIQD18	256	287	Motif-4
GarIQD11	1	28	Motif-5
GarIQD11	97	145	Motif-0
GarIQD11	146	167	Motif-6
GarIQD11	175	214	Motif-2
GarIQD11	232	264	Motif-4
GarIQD11	356	381	Motif-1
GarIQD36	1	30	Motif-5
GarIQD36	55	103	Motif-3
GarIQD36	128	176	Motif-0
GarIQD36	177	199	Motif-6
GarIQD36	234	260	Motif-7
GarIQD36	297	331	Motif-1
GarIQD15	1	29	Motif-5
GarIQD15	99	147	Motif-0
GarIQD15	148	171	Motif-6
GarIQD15	175	215	Motif-2
GarIQD15	233	262	Motif-4
GarIQD15	350	380	Motif-1
GarIQD21	1	29	Motif-5
GarIQD21	78	126	Motif-0
GarIQD21	127	151	Motif-6
GarIQD21	164	204	Motif-2
GarIQD21	215	247	Motif-4
GarIQD40	1	28	Motif-5
GarIQD40	82	104	Motif-8
GarIQD40	119	166	Motif-0
GarIQD40	168	191	Motif-6
GarIQD40	235	266	Motif-4
GarIQD40	273	296	Motif-7
GarIQD40	324	390	Motif-9
GarIQD40	509	593	Motif-9
GarIQD40	671	705	Motif-1
GarIQD16	1	27	Motif-5
GarIQD16	66	109	Motif-0
GarIQD16	115	139	Motif-6
GarIQD16	150	190	Motif-2
GarIQD16	200	232	Motif-4
GarIQD16	250	278	Motif-1
GarIQD34	1	28	Motif-5
GarIQD34	48	66	Motif-8
GarIQD34	112	159	Motif-0
GarIQD34	161	182	Motif-6
GarIQD34	206	238	Motif-7
GarIQD34	280	311	Motif-1
GarIQD34	359	382	Motif-11
GarIQD38	1	26	Motif-5
GarIQD38	65	112	Motif-0
GarIQD38	114	138	Motif-6
GarIQD38	149	189	Motif-2
GarIQD38	199	231	Motif-4
GarIQD49	1	29	Motif-5
GarIQD49	46	68	Motif-8
GarIQD49	120	168	Motif-0
GarIQD49	169	192	Motif-6
GarIQD49	282	316	Motif-1
GarIQD41	3	29	Motif-5
GarIQD41	79	127	Motif-0
GarIQD41	130	149	Motif-6
GarIQD41	170	197	Motif-4
GarIQD41	232	264	Motif-1
GarIQD01	3	32	Motif-5
GarIQD01	66	100	Motif-0
GarIQD01	116	140	Motif-6
GarIQD01	151	191	Motif-2
GarIQD01	201	232	Motif-4
GarIQD48	1	30	Motif-5
GarIQD48	47	72	Motif-0
GarIQD48	111	159	Motif-0
GarIQD48	160	182	Motif-6
GarIQD48	256	280	Motif-1
GarIQD04	1	30	Motif-5
GarIQD04	67	115	Motif-0

## Sheet: Gar-Motif Seq.
Genome Wide Identification, Classification and Functional Characterization Analysis of IQD gene family in Diploid and Tetraploid Cotton (Gossypium) Abdul Rehman1,2,3, Zhen Peng2, Hongge Li2, Guangyong Qin1, Yinhua Jia2，Zhaoe Pan2，Shoupu He1,2, Abdul Qayyum3 and Xiongming Du1,2*, 1Zhengzhou Research Base, State Key Laboratory of Cotton Biology, Zhengzhou University, Zhengzhou 450000, China. 2State…
DB	MotifSeq	MotifID	Length	NSites	Evalue	Bad
1	AIKIQTAFRGYLARRALRALKGLVRLQALVRGHLVRKQAAATLRCMQAL	MEME-1	49	49	0	FALSE
2	DDNSLSSSPSVPNYMAATZSAKAKVRSQSAPKQRP	MEME-2	35	41	0	FALSE
3	KZMEEDWDDSPQTKEEIEAKLQSKQEAAMKRERAMAYAFSH	MEME-3	41	27	0	FALSE
4	LAETEKEQNKHAIAVAAATAAAAEAAVAAAQAAAEVVRLTSNGRGSAEG	MEME-4	49	20	4.9E-324	FALSE
5	PNPLFMDPDKPNWGWSWLERWMAARPWENRGRA	MEME-5	33	34	2e-305	FALSE
6	MGKKGKWFSSVKKAFKSESKDKKEKSSDKK	MEME-6	30	46	1.5e-217	FALSE
7	VRVQARVRARRIRMSEEGQALQKKL	MEME-7	25	43	3.1e-185	FALSE
8	SNDDEESPKIVEIDTGKPRSSSSRRNRNVSSSQ	MEME-8	33	13	8.5e-60	FALSE
9	GSAKKRLSFPESPASGSSHSGKRSV	MEME-9	25	28	8.2e-51	FALSE
10	EPNIAEBPVLNNRRGZHGGSECGLELSSTSTKDSPDKSEVGTEEYEKTLKVSEQENCSSNSEKDLDVKENDVTAILVPDSSLSAALQPSKLDDSKGEPAVLPAVDSPQAEQEPL	MEME-10	114	6	5.4e-56	FALSE
11	DDDTDWGFTGDECRFSTAQSTPRFINSC	MEME-11	28	5	2.1e-35	FALSE
12	SIPSRKLKSASPRSSVVGPDDDTRSIVSVQSERNRRHSIAGSSVR	MEME-12	45	5	5.3e-35	FALSE

## Sheet: Gba-Motif Info
Genome Wide Identification, Classification and Functional Characterization Analysis of IQD gene family in Diploid and Tetraploid Cotton (Gossypium) Abdul Rehman1,2,3, Zhen Peng2, Hongge Li2, Guangyong Qin1, Yinhua Jia2，Zhaoe Pan2，Shoupu He1,2, Abdul Qayyum3 and Xiongming Du1,2*, 1Zhengzhou Research Base, State Key Laboratory of Cotton Biology, Zhengzhou University, Zhengzhou 450000, China. 2State…
GbaIQD13	1	34	Motif-6
GbaIQD13	154	202	Motif-0
GbaIQD13	203	234	Motif-5
GbaIQD13	268	300	Motif-3
GbaIQD13	304	395	Motif-9
GbaIQD13	435	480	Motif-8
GbaIQD13	586	714	Motif-7
GbaIQD13	804	845	Motif-1
GbaIQD62	1	34	Motif-6
GbaIQD62	42	98	Motif-9
GbaIQD62	154	202	Motif-0
GbaIQD62	203	234	Motif-5
GbaIQD62	268	300	Motif-3
GbaIQD62	304	395	Motif-9
GbaIQD62	435	480	Motif-8
GbaIQD62	586	714	Motif-7
GbaIQD62	804	844	Motif-1
GbaIQD48	1	35	Motif-6
GbaIQD48	180	228	Motif-0
GbaIQD48	229	262	Motif-5
GbaIQD48	293	324	Motif-3
GbaIQD48	376	421	Motif-8
GbaIQD48	529	657	Motif-7
GbaIQD48	741	782	Motif-1
GbaIQD02	1	35	Motif-6
GbaIQD02	180	228	Motif-0
GbaIQD02	229	262	Motif-5
GbaIQD02	293	323	Motif-3
GbaIQD02	376	420	Motif-8
GbaIQD02	435	490	Motif-9
GbaIQD02	529	657	Motif-7
GbaIQD02	741	782	Motif-1
GbaIQD91	1	34	Motif-6
GbaIQD91	42	110	Motif-11
GbaIQD91	115	163	Motif-0
GbaIQD91	164	197	Motif-5
GbaIQD91	228	262	Motif-3
GbaIQD91	311	402	Motif-9
GbaIQD91	445	486	Motif-1
GbaIQD90	1	34	Motif-6
GbaIQD90	42	110	Motif-11
GbaIQD90	115	163	Motif-0
GbaIQD90	164	196	Motif-5
GbaIQD90	228	261	Motif-3
GbaIQD90	311	402	Motif-9
GbaIQD90	445	486	Motif-1
GbaIQD90	535	554	Motif-10
GbaIQD64	1	34	Motif-6
GbaIQD64	139	186	Motif-0
GbaIQD64	188	217	Motif-5
GbaIQD64	236	267	Motif-3
GbaIQD64	308	347	Motif-8
GbaIQD64	381	509	Motif-7
GbaIQD64	516	547	Motif-6
GbaIQD64	579	620	Motif-1
GbaIQD42	1	33	Motif-6
GbaIQD42	40	107	Motif-11
GbaIQD42	113	161	Motif-0
GbaIQD42	162	194	Motif-5
GbaIQD42	226	260	Motif-3
GbaIQD42	309	400	Motif-9
GbaIQD42	443	484	Motif-1
GbaIQD41	1	34	Motif-6
GbaIQD41	42	110	Motif-11
GbaIQD41	115	163	Motif-0
GbaIQD41	164	196	Motif-5
GbaIQD41	228	261	Motif-3
GbaIQD41	311	402	Motif-9
GbaIQD41	442	483	Motif-1
GbaIQD92	1	35	Motif-6
GbaIQD92	65	109	Motif-4
GbaIQD92	120	168	Motif-0
GbaIQD92	169	203	Motif-5
GbaIQD92	211	248	Motif-2
GbaIQD92	253	287	Motif-3
GbaIQD92	306	351	Motif-8
GbaIQD92	384	425	Motif-1
GbaIQD17	1	34	Motif-6
GbaIQD17	139	186	Motif-0
GbaIQD17	188	217	Motif-5
GbaIQD17	236	267	Motif-3
GbaIQD17	303	340	Motif-8
GbaIQD17	376	504	Motif-7
GbaIQD17	511	542	Motif-6
GbaIQD17	574	615	Motif-1
GbaIQD43	1	34	Motif-6
GbaIQD43	65	109	Motif-4
GbaIQD43	120	168	Motif-0
GbaIQD43	169	203	Motif-5
GbaIQD43	211	248	Motif-2
GbaIQD43	253	287	Motif-3
GbaIQD43	306	351	Motif-8
GbaIQD43	384	425	Motif-1
GbaIQD55	1	35	Motif-6
GbaIQD55	57	105	Motif-4
GbaIQD55	111	159	Motif-0
GbaIQD55	160	194	Motif-5
GbaIQD55	204	241	Motif-2
GbaIQD55	246	280	Motif-3
GbaIQD55	298	341	Motif-8
GbaIQD55	380	418	Motif-1
GbaIQD15	1	35	Motif-6
GbaIQD15	57	105	Motif-4
GbaIQD15	111	159	Motif-0
GbaIQD15	160	194	Motif-5
GbaIQD15	204	241	Motif-2
GbaIQD15	246	280	Motif-3
GbaIQD15	298	341	Motif-8
GbaIQD15	380	418	Motif-1
GbaIQD27	1	34	Motif-6
GbaIQD27	53	83	Motif-4
GbaIQD27	109	157	Motif-0
GbaIQD27	158	192	Motif-5
GbaIQD27	200	237	Motif-2
GbaIQD27	242	276	Motif-3
GbaIQD27	294	339	Motif-8
GbaIQD27	373	414	Motif-1
GbaIQD49	1	35	Motif-6
GbaIQD49	54	91	Motif-4
GbaIQD49	109	157	Motif-0
GbaIQD49	158	192	Motif-5
GbaIQD49	200	237	Motif-2
GbaIQD49	242	276	Motif-3
GbaIQD49	293	338	Motif-8
GbaIQD49	371	412	Motif-1
GbaIQD86	3	36	Motif-6
GbaIQD86	55	102	Motif-4
GbaIQD86	106	154	Motif-0
GbaIQD86	155	187	Motif-5
GbaIQD86	212	249	Motif-2
GbaIQD86	279	304	Motif-10
GbaIQD86	376	416	Motif-1
GbaIQD86	440	485	Motif-8
GbaIQD03	1	35	Motif-6
GbaIQD03	54	91	Motif-4
GbaIQD03	109	157	Motif-0
GbaIQD03	158	192	Motif-5
GbaIQD03	200	237	Motif-2
GbaIQD03	242	275	Motif-3
GbaIQD03	293	338	Motif-8
GbaIQD03	371	412	Motif-1
GbaIQD37	3	35	Motif-6
GbaIQD37	59	105	Motif-4
GbaIQD37	110	158	Motif-0
GbaIQD37	159	189	Motif-5
GbaIQD37	213	250	Motif-2
GbaIQD37	280	305	Motif-10
GbaIQD37	377	416	Motif-1
GbaIQD37	441	486	Motif-8
GbaIQD29	1	35	Motif-6
GbaIQD29	40	108	Motif-11
GbaIQD29	173	221	Motif-0
GbaIQD29	222	256	Motif-5
GbaIQD29	268	305	Motif-2
GbaIQD29	412	452	Motif-1
GbaIQD29	458	501	Motif-8
GbaIQD58	1	34	Motif-6
GbaIQD58	97	145	Motif-0
GbaIQD58	146	179	Motif-5
GbaIQD58	188	225	Motif-2
GbaIQD58	229	263	Motif-3
GbaIQD58	279	347	Motif-11
GbaIQD38	3	36	Motif-6
GbaIQD38	82	127	Motif-4
GbaIQD38	138	186	Motif-0
GbaIQD38	187	215	Motif-5
GbaIQD38	245	282	Motif-2
GbaIQD38	283	311	Motif-3
GbaIQD38	318	343	Motif-10
GbaIQD38	394	433	Motif-1
GbaIQD38	459	504	Motif-8
GbaIQD85	3	36	Motif-6
GbaIQD85	74	108	Motif-4
GbaIQD85	126	174	Motif-0
GbaIQD85	175	203	Motif-5
GbaIQD85	232	269	Motif-2
GbaIQD85	270	300	Motif-3
GbaIQD85	305	330	Motif-10
GbaIQD85	406	445	Motif-1
GbaIQD85	470	515	Motif-8
GbaIQD79	1	35	Motif-6
GbaIQD79	40	108	Motif-11
GbaIQD79	173	220	Motif-0
GbaIQD79	222	254	Motif-5
GbaIQD79	268	305	Motif-2
GbaIQD79	412	453	Motif-1
GbaIQD79	458	501	Motif-8
GbaIQD56	1	34	Motif-6
GbaIQD56	57	92	Motif-4
GbaIQD56	108	156	Motif-0
GbaIQD56	157	191	Motif-5
GbaIQD56	199	236	Motif-2
GbaIQD56	241	275	Motif-3
GbaIQD56	295	340	Motif-8
GbaIQD56	373	414	Motif-1
GbaIQD76	30	62	Motif-6
GbaIQD76	126	174	Motif-0
GbaIQD76	175	209	Motif-5
GbaIQD76	217	254	Motif-2
GbaIQD76	258	292	Motif-3
GbaIQD76	308	376	Motif-11
GbaIQD87	3	36	Motif-6
GbaIQD87	81	126	Motif-4
GbaIQD87	137	185	Motif-0
GbaIQD87	186	214	Motif-5
GbaIQD87	244	281	Motif-2
GbaIQD87	282	310	Motif-3
GbaIQD87	317	342	Motif-10
GbaIQD87	393	431	Motif-1
GbaIQD87	458	502	Motif-8
GbaIQD09	1	34	Motif-6
GbaIQD09	96	144	Motif-0
GbaIQD09	145	178	Motif-5
GbaIQD09	187	224	Motif-2
GbaIQD09	228	262	Motif-3
GbaIQD09	278	346	Motif-11
GbaIQD25	1	33	Motif-6
GbaIQD25	97	145	Motif-0
GbaIQD25	146	180	Motif-5
GbaIQD25	188	225	Motif-2
GbaIQD25	229	263	Motif-3
GbaIQD25	279	347	Motif-11
GbaIQD07	1	33	Motif-6
GbaIQD07	61	97	Motif-4
GbaIQD07	112	160	Motif-0
GbaIQD07	161	195	Motif-5
GbaIQD07	203	240	Motif-2
GbaIQD07	245	279	Motif-3
GbaIQD07	299	344	Motif-8
GbaIQD07	377	418	Motif-1
GbaIQD36	3	36	Motif-6
GbaIQD36	74	108	Motif-4
GbaIQD36	126	174	Motif-0
GbaIQD36	175	203	Motif-5
GbaIQD36	232	268	Motif-2
GbaIQD36	270	297	Motif-3
GbaIQD36	305	330	Motif-10
GbaIQD36	406	445	Motif-1
GbaIQD36	470	515	Motif-8
GbaIQD21	1	30	Motif-6
GbaIQD21	115	163	Motif-0
GbaIQD21	164	198	Motif-5
GbaIQD21	229	263	Motif-3
GbaIQD21	271	296	Motif-10
GbaIQD21	330	421	Motif-9
GbaIQD21	545	586	Motif-1
GbaIQD78	95	124	Motif-4
GbaIQD78	151	199	Motif-0
GbaIQD78	200	234	Motif-5
GbaIQD78	242	279	Motif-2
GbaIQD78	284	318	Motif-3
GbaIQD78	336	381	Motif-8
GbaIQD78	415	456	Motif-1
GbaIQD82	1	34	Motif-6
GbaIQD82	41	109	Motif-11
GbaIQD82	151	199	Motif-0
GbaIQD82	200	232	Motif-5
GbaIQD82	251	288	Motif-2
GbaIQD82	291	309	Motif-3
GbaIQD82	404	444	Motif-1
GbaIQD82	451	484	Motif-8
GbaIQD84	1	29	Motif-6
GbaIQD84	118	166	Motif-0
GbaIQD84	167	201	Motif-5
GbaIQD84	232	266	Motif-3
GbaIQD84	272	297	Motif-10
GbaIQD84	332	423	Motif-9
GbaIQD84	508	563	Motif-9
GbaIQD84	662	703	Motif-1
GbaIQD32	49	82	Motif-6
GbaIQD32	89	157	Motif-11
GbaIQD32	199	247	Motif-0
GbaIQD32	248	280	Motif-5
GbaIQD32	299	336	Motif-2
GbaIQD32	339	357	Motif-3
GbaIQD32	452	491	Motif-1
GbaIQD32	499	533	Motif-8
GbaIQD69	27	75	Motif-0
GbaIQD69	76	110	Motif-5
GbaIQD69	141	175	Motif-3
GbaIQD69	183	208	Motif-10
GbaIQD69	241	332	Motif-9
GbaIQD69	456	497	Motif-1
GbaIQD35	1	29	Motif-6
GbaIQD35	118	166	Motif-0
GbaIQD35	167	201	Motif-5
GbaIQD35	232	266	Motif-3
GbaIQD35	272	297	Motif-10
GbaIQD35	332	423	Motif-9
GbaIQD35	508	563	Motif-9
GbaIQD35	662	703	Motif-1
GbaIQD72	3	36	Motif-6
GbaIQD72	86	134	Motif-4
GbaIQD72	137	185	Motif-0
GbaIQD72	186	217	Motif-5
GbaIQD72	246	283	Motif-2
GbaIQD72	318	343	Motif-10
GbaIQD72	409	447	Motif-1
GbaIQD72	477	519	Motif-8
GbaIQD88	2	35	Motif-6
GbaIQD88	62	110	Motif-4
GbaIQD88	113	161	Motif-0
GbaIQD88	162	196	Motif-5
GbaIQD88	213	250	Motif-2
GbaIQD88	262	296	Motif-3
GbaIQD88	331	366	Motif-1
GbaIQD50	1	35	Motif-6
GbaIQD50	41	109	Motif-11
GbaIQD50	162	210	Motif-0
GbaIQD50	211	243	Motif-5
GbaIQD50	261	298	Motif-2
GbaIQD50	304	321	Motif-3
GbaIQD50	423	463	Motif-1
GbaIQD50	469	501	Motif-8
GbaIQD39	2	35	Motif-6
GbaIQD39	62	110	Motif-4
GbaIQD39	113	161	Motif-0
GbaIQD39	162	196	Motif-5
GbaIQD39	213	250	Motif-2
GbaIQD39	262	295	Motif-3
GbaIQD39	331	366	Motif-1
GbaIQD94	1	35	Motif-6
GbaIQD94	71	119	Motif-0
GbaIQD94	120	154	Motif-5
GbaIQD94	162	199	Motif-2
GbaIQD94	211	243	Motif-3
GbaIQD94	320	358	Motif-1
GbaIQD65	1	34	Motif-6
GbaIQD65	42	89	Motif-4
GbaIQD65	106	154	Motif-0
GbaIQD65	155	188	Motif-5
GbaIQD65	200	237	Motif-2
GbaIQD65	317	357	Motif-1
GbaIQD65	362	407	Motif-8
GbaIQD18	1	34	Motif-6
GbaIQD18	42	89	Motif-4
GbaIQD18	106	154	Motif-0
GbaIQD18	155	188	Motif-5
GbaIQD18	200	237	Motif-2
GbaIQD18	317	357	Motif-1
GbaIQD18	362	407	Motif-8
GbaIQD57	1	33	Motif-6
GbaIQD57	54	102	Motif-4
GbaIQD57	110	158	Motif-0
GbaIQD57	159	186	Motif-5
GbaIQD57	211	236	Motif-10
GbaIQD57	302	343	Motif-1
GbaIQD08	1	33	Motif-6
GbaIQD08	54	102	Motif-4
GbaIQD08	110	158	Motif-0
GbaIQD08	159	186	Motif-5
GbaIQD08	211	236	Motif-10
GbaIQD08	302	343	Motif-1
GbaIQD67	1	35	Motif-6
GbaIQD67	67	115	Motif-4
GbaIQD67	124	172	Motif-0
GbaIQD67	173	205	Motif-5
GbaIQD67	213	238	Motif-10
GbaIQD67	306	342	Motif-1
GbaIQD52	1	33	Motif-6
GbaIQD52	65	113	Motif-4
GbaIQD52	121	169	Motif-0
GbaIQD52	170	204	Motif-5
GbaIQD52	211	236	Motif-10
GbaIQD52	305	346	Motif-1
GbaIQD20	1	35	Motif-6
GbaIQD20	67	115	Motif-4
GbaIQD20	124	172	Motif-0
GbaIQD20	173	205	Motif-5
GbaIQD20	213	238	Motif-10
GbaIQD20	306	342	Motif-1
GbaIQD75	1	34	Motif-6
GbaIQD75	70	118	Motif-0
GbaIQD75	119	153	Motif-5
GbaIQD75	161	198	Motif-2
GbaIQD75	210	243	Motif-3
GbaIQD75	323	364	Motif-1
GbaIQD04	1	33	Motif-6
GbaIQD04	65	113	Motif-4
GbaIQD04	121	169	Motif-0
GbaIQD04	170	204	Motif-5
GbaIQD04	211	236	Motif-10
GbaIQD04	305	346	Motif-1
GbaIQD46	1	35	Motif-6
GbaIQD46	71	119	Motif-0
GbaIQD46	120	154	Motif-5
GbaIQD46	162	199	Motif-2
GbaIQD46	211	242	Motif-3
GbaIQD46	328	365	Motif-1
GbaIQD24	1	34	Motif-6
GbaIQD24	70	118	Motif-0
GbaIQD24	119	153	Motif-5
GbaIQD24	161	198	Motif-2
GbaIQD24	210	243	Motif-3
GbaIQD24	323	364	Motif-1
GbaIQD06	1	34	Motif-6
GbaIQD06	75	123	Motif-4
GbaIQD06	143	191	Motif-0
GbaIQD06	192	224	Motif-5
GbaIQD06	285	310	Motif-10
GbaIQD06	357	377	Motif-10
GbaIQD06	391	432	Motif-1
GbaIQD10	1	34	Motif-6
GbaIQD10	70	118	Motif-4
GbaIQD10	126	174	Motif-0
GbaIQD10	175	209	Motif-5
GbaIQD10	227	252	Motif-10
GbaIQD10	278	301	Motif-3
GbaIQD10	321	362	Motif-1
GbaIQD59	1	34	Motif-6
GbaIQD59	70	118	Motif-4
GbaIQD59	126	174	Motif-0
GbaIQD59	175	209	Motif-5
GbaIQD59	227	252	Motif-10
GbaIQD59	322	363	Motif-1
GbaIQD70	2	34	Motif-6
GbaIQD70	60	108	Motif-4
GbaIQD70	111	159	Motif-0
GbaIQD70	160	191	Motif-5
GbaIQD70	211	237	Motif-2
GbaIQD70	264	297	Motif-3
GbaIQD70	330	365	Motif-1
GbaIQD68	1	35	Motif-6
GbaIQD68	93	141	Motif-0
GbaIQD68	142	176	Motif-5
GbaIQD68	184	221	Motif-2
GbaIQD68	235	267	Motif-3
GbaIQD68	350	387	Motif-1
GbaIQD53	1	33	Motif-6
GbaIQD53	76	124	Motif-4
GbaIQD53	144	192	Motif-0
GbaIQD53	193	225	Motif-5
GbaIQD53	286	311	Motif-10
GbaIQD53	358	378	Motif-10
GbaIQD53	392	433	Motif-1
GbaIQD73	1	34	Motif-6
GbaIQD73	70	117	Motif-4
GbaIQD73	135	183	Motif-0
GbaIQD73	184	209	Motif-5
GbaIQD73	244	276	Motif-3
GbaIQD73	283	308	Motif-10
GbaIQD73	384	425	Motif-1
GbaIQD83	1	35	Motif-6
GbaIQD83	54	102	Motif-4
GbaIQD83	127	175	Motif-0
GbaIQD83	176	209	Motif-5
GbaIQD83	288	328	Motif-1
GbaIQD83	333	376	Motif-8
GbaIQD23	1	35	Motif-6
GbaIQD23	69	117	Motif-4
GbaIQD23	123	167	Motif-0
GbaIQD23	189	213	Motif-10
GbaIQD23	285	325	Motif-1
GbaIQD33	1	35	Motif-6
GbaIQD33	54	102	Motif-4
GbaIQD33	127	175	Motif-0
GbaIQD33	176	209	Motif-5
GbaIQD33	288	328	Motif-1
GbaIQD33	333	376	Motif-8
GbaIQD77	1	35	Motif-6
GbaIQD77	52	100	Motif-4
GbaIQD77	109	155	Motif-0
GbaIQD77	209	246	Motif-2
GbaIQD77	320	360	Motif-1
GbaIQD26	1	35	Motif-6
GbaIQD26	52	100	Motif-4
GbaIQD26	109	156	Motif-0
GbaIQD26	209	245	Motif-2
GbaIQD26	320	360	Motif-1
GbaIQD63	1	34	Motif-6
GbaIQD63	68	116	Motif-4
GbaIQD63	119	164	Motif-0
GbaIQD63	168	201	Motif-5
GbaIQD63	212	249	Motif-2
GbaIQD63	254	287	Motif-3
GbaIQD14	1	34	Motif-6
GbaIQD14	68	115	Motif-4
GbaIQD14	119	164	Motif-0
GbaIQD14	168	199	Motif-5
GbaIQD14	212	249	Motif-2
GbaIQD14	254	287	Motif-3
GbaIQD74	1	35	Motif-6
GbaIQD74	69	117	Motif-4
GbaIQD74	123	167	Motif-0
GbaIQD74	189	214	Motif-10
GbaIQD74	284	324	Motif-1
GbaIQD40	1	34	Motif-6
GbaIQD40	54	102	Motif-4
GbaIQD40	111	158	Motif-0
GbaIQD40	204	241	Motif-2
GbaIQD40	311	352	Motif-1
GbaIQD89	1	34	Motif-6
GbaIQD89	54	102	Motif-4
GbaIQD89	111	158	Motif-0
GbaIQD89	204	241	Motif-2
GbaIQD89	311	352	Motif-1
GbaIQD28	47	94	Motif-4
GbaIQD28	105	152	Motif-0
GbaIQD28	154	184	Motif-5
GbaIQD28	218	245	Motif-3
GbaIQD28	258	283	Motif-10
GbaIQD28	368	409	Motif-1
GbaIQD16	1	32	Motif-6
GbaIQD16	96	144	Motif-0
GbaIQD16	145	177	Motif-5
GbaIQD16	181	217	Motif-2
GbaIQD16	230	264	Motif-3
GbaIQD16	290	326	Motif-8
GbaIQD16	348	378	Motif-1
GbaIQD54	1	32	Motif-6
GbaIQD54	96	144	Motif-0
GbaIQD54	145	175	Motif-5
GbaIQD54	181	216	Motif-2
GbaIQD54	229	263	Motif-3
GbaIQD54	289	325	Motif-8
GbaIQD54	347	377	Motif-1
GbaIQD60	1	34	Motif-6
GbaIQD60	98	146	Motif-0
GbaIQD60	181	217	Motif-2
GbaIQD60	230	261	Motif-3
GbaIQD60	341	378	Motif-1
GbaIQD11	1	34	Motif-6
GbaIQD11	98	146	Motif-0
GbaIQD11	181	217	Motif-2
GbaIQD11	230	261	Motif-3
GbaIQD11	341	377	Motif-1
GbaIQD71	1	27	Motif-6
GbaIQD71	45	93	Motif-4
GbaIQD71	104	151	Motif-0
GbaIQD71	153	180	Motif-5
GbaIQD71	227	252	Motif-10
GbaIQD71	338	377	Motif-1
GbaIQD19	1	34	Motif-6
GbaIQD19	77	125	Motif-0
GbaIQD19	126	160	Motif-5
GbaIQD19	170	207	Motif-2
GbaIQD19	212	246	Motif-3
GbaIQD66	1	34	Motif-6
GbaIQD66	77	125	Motif-0
GbaIQD66	126	160	Motif-5
GbaIQD66	170	207	Motif-2
GbaIQD66	212	246	Motif-3
GbaIQD12	1	35	Motif-6
GbaIQD12	65	108	Motif-0
GbaIQD12	114	148	Motif-5
GbaIQD12	156	193	Motif-2
GbaIQD12	197	231	Motif-3
GbaIQD61	1	35	Motif-6
GbaIQD61	65	108	Motif-0
GbaIQD61	114	148	Motif-5
GbaIQD61	156	193	Motif-2
GbaIQD61	197	231	Motif-3
GbaIQD31	1	32	Motif-6
GbaIQD31	64	111	Motif-0
GbaIQD31	113	147	Motif-5
GbaIQD31	155	192	Motif-2
GbaIQD31	196	230	Motif-3
GbaIQD22	1	33	Motif-6
GbaIQD22	69	117	Motif-4
GbaIQD22	134	182	Motif-0
GbaIQD22	183	211	Motif-5
GbaIQD22	243	274	Motif-3
GbaIQD81	1	32	Motif-6
GbaIQD81	64	109	Motif-0
GbaIQD81	113	147	Motif-5
GbaIQD81	155	192	Motif-2
GbaIQD81	196	230	Motif-3
GbaIQD80	1	32	Motif-6
GbaIQD80	111	159	Motif-0
GbaIQD80	160	185	Motif-5
GbaIQD80	205	230	Motif-10
GbaIQD80	271	311	Motif-1
GbaIQD30	1	32	Motif-6
GbaIQD30	111	159	Motif-0
GbaIQD30	160	185	Motif-5
GbaIQD30	205	230	Motif-10
GbaIQD30	271	311	Motif-1
GbaIQD45	1	32	Motif-6
GbaIQD45	75	105	Motif-1
GbaIQD45	119	167	Motif-0
GbaIQD45	168	199	Motif-5
GbaIQD45	273	313	Motif-1
GbaIQD93	1	32	Motif-6
GbaIQD93	75	105	Motif-1
GbaIQD93	119	167	Motif-0
GbaIQD93	168	199	Motif-5
GbaIQD93	273	312	Motif-1
GbaIQD01	70	103	Motif-0
GbaIQD01	120	154	Motif-5
GbaIQD01	162	199	Motif-2
GbaIQD01	203	236	Motif-3
GbaIQD34	3	35	Motif-6
GbaIQD34	78	126	Motif-0
GbaIQD34	170	199	Motif-3
GbaIQD34	226	261	Motif-1
GbaIQD47	96	129	Motif-0
GbaIQD47	146	180	Motif-5
GbaIQD47	188	225	Motif-2
GbaIQD47	229	262	Motif-3
GbaIQD44	1	33	Motif-6
GbaIQD44	46	73	Motif-0
GbaIQD44	110	157	Motif-0
GbaIQD44	159	189	Motif-5
GbaIQD44	247	276	Motif-1
GbaIQD05	1	35	Motif-6
GbaIQD05	66	114	Motif-0
GbaIQD05	115	145	Motif-5
GbaIQD51	1	35	Motif-6
GbaIQD51	66	114	Motif-0

## Sheet: Gba-Motif Seq.
Genome Wide Identification, Classification and Functional Characterization Analysis of IQD gene family in Diploid and Tetraploid Cotton (Gossypium) Abdul Rehman1,2,3, Zhen Peng2, Hongge Li2, Guangyong Qin1, Yinhua Jia2，Zhaoe Pan2，Shoupu He1,2, Abdul Qayyum3 and Xiongming Du1,2*, 1Zhengzhou Research Base, State Key Laboratory of Cotton Biology, Zhengzhou University, Zhengzhou 450000, China. 2State…
DB	MotifSeq	MotifID	Length	NSites	Evalue	Bad
1	AAIKIQTAFRGYLARRALRALKGLVRLQALVRGHLVRKQAAATLRCMQA	MEME-1	49	92	0	FALSE
2	PSTPASSDGDDNSLNSSPSLPNYMAATZSAKAKLRSQSAPRQ	MEME-2	42	76	0	FALSE
3	WDDSPGTKEEIEAKLQSKQEAAMKRERAMAYAFSHQQR	MEME-3	38	53	0	FALSE
4	SRSPNPLFMDPDKPSWGWSWLERWMAARPWETRGM	MEME-4	35	58	0	FALSE
5	SLAEAEEEQNKHAIAVAAATAAAAEAAVAAAQAAAEVVRLTSNGRGSAE	MEME-5	49	38	0	FALSE
6	LVRVQARVRARRIRMSEEGQALQKKLQQKRAKELK	MEME-6	35	81	0	FALSE
7	MGKKGKWFSSVKKAKKSESKDKKEKSSKKKKKKKK	MEME-7	35	87	0	FALSE
8	SRSKEPSISENPVLNNRRGQHGGSECGTELSITSTLDSPDRSEVGTIEYENGVKVSEQENCSSNSTKDLDVKENDTIAIPVPDSSLSIANQPEKLDDSKGELANLIVADSPQVEQEPLKGSSDLQRESD	MEME-8	129	6	0	FALSE
9	EGGEISKAYARYKLNLDSPSSKSSQKPSRGSSLQSNSSPKSTESLG	MEME-9	46	26	1.1e-201	FALSE
10	VQEHPQNELEKVKRNLRKVSNPVKEVSDKSEVENEKTKKTLKKSSSSNBPDVEEQESAEKERDVTATLSELSNLEADLKKNSEDPSLGEPEV	MEME-10	92	10	1.7e-193	FALSE
11	ASNDKEDNPKIVEIDTGKPKSSSRRR	MEME-11	26	28	5.1e-171	FALSE
12	AKLKHGETSSFKPLIRKPSSIEKILNEAEREKGJSFRPPTDPEPPKSPPVVPNVAASPNKPSPRPASPR	MEME-12	69	13	1.1e-199	FALSE

## Sheet: Ghi-Motif info
Genome Wide Identification, Classification and Functional Characterization Analysis of IQD gene family in Diploid and Tetraploid Cotton (Gossypium) Abdul Rehman1,2,3, Zhen Peng2, Hongge Li2, Guangyong Qin1, Yinhua Jia2，Zhaoe Pan2，Shoupu He1,2, Abdul Qayyum3 and Xiongming Du1,2*, 1Zhengzhou Research Base, State Key Laboratory of Cotton Biology, Zhengzhou University, Zhengzhou 450000, China. 2State…
GhiIQD97	1	32	Motif-5
GhiIQD97	65	107	Motif-4
GhiIQD97	120	168	Motif-0
GhiIQD97	169	203	Motif-6
GhiIQD97	208	245	Motif-2
GhiIQD97	256	290	Motif-3
GhiIQD97	295	363	Motif-11
GhiIQD97	385	427	Motif-1
GhiIQD97	430	464	Motif-10
GhiIQD47	1	32	Motif-5
GhiIQD47	65	107	Motif-4
GhiIQD47	120	168	Motif-0
GhiIQD47	169	203	Motif-6
GhiIQD47	208	245	Motif-2
GhiIQD47	256	290	Motif-3
GhiIQD47	295	363	Motif-11
GhiIQD47	385	427	Motif-1
GhiIQD47	430	464	Motif-10
GhiIQD60	1	31	Motif-5
GhiIQD60	57	91	Motif-4
GhiIQD60	108	156	Motif-0
GhiIQD60	157	191	Motif-6
GhiIQD60	196	233	Motif-2
GhiIQD60	244	277	Motif-3
GhiIQD60	284	352	Motif-11
GhiIQD60	374	416	Motif-1
GhiIQD60	418	452	Motif-10
GhiIQD31	1	31	Motif-5
GhiIQD31	53	81	Motif-4
GhiIQD31	109	157	Motif-0
GhiIQD31	158	192	Motif-6
GhiIQD31	197	234	Motif-2
GhiIQD31	245	279	Motif-3
GhiIQD31	283	351	Motif-11
GhiIQD31	374	416	Motif-1
GhiIQD31	418	452	Motif-10
GhiIQD08	1	29	Motif-5
GhiIQD08	54	90	Motif-4
GhiIQD08	105	153	Motif-0
GhiIQD08	154	188	Motif-6
GhiIQD08	193	230	Motif-2
GhiIQD08	241	274	Motif-3
GhiIQD08	281	349	Motif-11
GhiIQD08	371	413	Motif-1
GhiIQD08	415	449	Motif-10
GhiIQD53	1	32	Motif-5
GhiIQD53	54	88	Motif-4
GhiIQD53	109	157	Motif-0
GhiIQD53	158	192	Motif-6
GhiIQD53	197	234	Motif-2
GhiIQD53	245	279	Motif-3
GhiIQD53	282	350	Motif-11
GhiIQD53	372	414	Motif-1
GhiIQD53	416	450	Motif-10
GhiIQD59	1	32	Motif-5
GhiIQD59	57	105	Motif-4
GhiIQD59	111	159	Motif-0
GhiIQD59	160	194	Motif-6
GhiIQD59	201	238	Motif-2
GhiIQD59	249	283	Motif-3
GhiIQD59	287	355	Motif-11
GhiIQD59	381	419	Motif-1
GhiIQD16	1	32	Motif-5
GhiIQD16	57	105	Motif-4
GhiIQD16	111	159	Motif-0
GhiIQD16	160	194	Motif-6
GhiIQD16	201	238	Motif-2
GhiIQD16	249	283	Motif-3
GhiIQD16	287	355	Motif-11
GhiIQD16	381	419	Motif-1
GhiIQD03	1	32	Motif-5
GhiIQD03	54	88	Motif-4
GhiIQD03	109	157	Motif-0
GhiIQD03	158	192	Motif-6
GhiIQD03	197	234	Motif-2
GhiIQD03	245	278	Motif-3
GhiIQD03	282	350	Motif-11
GhiIQD03	372	414	Motif-1
GhiIQD03	416	450	Motif-10
GhiIQD86	1	31	Motif-5
GhiIQD86	38	134	Motif-8
GhiIQD86	151	199	Motif-0
GhiIQD86	200	233	Motif-6
GhiIQD86	248	285	Motif-2
GhiIQD86	294	326	Motif-3
GhiIQD86	405	446	Motif-1
GhiIQD36	1	31	Motif-5
GhiIQD36	38	134	Motif-8
GhiIQD36	151	199	Motif-0
GhiIQD36	200	233	Motif-6
GhiIQD36	248	285	Motif-2
GhiIQD36	294	326	Motif-3
GhiIQD36	405	446	Motif-1
GhiIQD33	1	32	Motif-5
GhiIQD33	37	133	Motif-8
GhiIQD33	173	221	Motif-0
GhiIQD33	222	253	Motif-6
GhiIQD33	265	302	Motif-2
GhiIQD33	308	340	Motif-3
GhiIQD33	413	454	Motif-1
GhiIQD83	1	32	Motif-5
GhiIQD83	37	133	Motif-8
GhiIQD83	173	220	Motif-0
GhiIQD83	222	251	Motif-6
GhiIQD83	265	302	Motif-2
GhiIQD83	308	340	Motif-3
GhiIQD83	413	455	Motif-1
GhiIQD82	47	74	Motif-4
GhiIQD82	103	151	Motif-0
GhiIQD82	152	186	Motif-6
GhiIQD82	191	228	Motif-2
GhiIQD82	239	273	Motif-3
GhiIQD82	277	345	Motif-11
GhiIQD82	368	410	Motif-1
GhiIQD82	412	446	Motif-10
GhiIQD04	1	32	Motif-5
GhiIQD04	38	134	Motif-8
GhiIQD04	162	210	Motif-0
GhiIQD04	211	245	Motif-6
GhiIQD04	256	293	Motif-2
GhiIQD04	305	337	Motif-3
GhiIQD04	421	462	Motif-1
GhiIQD54	1	32	Motif-5
GhiIQD54	38	134	Motif-8
GhiIQD54	162	210	Motif-0
GhiIQD54	211	244	Motif-6
GhiIQD54	258	295	Motif-2
GhiIQD54	307	339	Motif-3
GhiIQD54	424	465	Motif-1
GhiIQD91	3	34	Motif-5
GhiIQD91	55	103	Motif-4
GhiIQD91	106	154	Motif-0
GhiIQD91	155	186	Motif-6
GhiIQD91	209	246	Motif-2
GhiIQD91	247	275	Motif-3
GhiIQD91	282	311	Motif-9
GhiIQD91	377	418	Motif-1
GhiIQD91	420	454	Motif-10
GhiIQD68	1	31	Motif-5
GhiIQD68	139	186	Motif-0
GhiIQD68	188	215	Motif-6
GhiIQD68	239	272	Motif-3
GhiIQD68	380	497	Motif-7
GhiIQD68	516	544	Motif-5
GhiIQD68	580	622	Motif-1
GhiIQD52	1	32	Motif-5
GhiIQD52	180	228	Motif-0
GhiIQD52	229	254	Motif-6
GhiIQD52	297	329	Motif-3
GhiIQD52	334	358	Motif-9
GhiIQD52	451	488	Motif-11
GhiIQD52	529	646	Motif-7
GhiIQD52	743	785	Motif-1
GhiIQD18	1	31	Motif-5
GhiIQD18	139	186	Motif-0
GhiIQD18	188	215	Motif-6
GhiIQD18	239	272	Motif-3
GhiIQD18	375	492	Motif-7
GhiIQD18	511	539	Motif-5
GhiIQD18	575	617	Motif-1
GhiIQD02	1	32	Motif-5
GhiIQD02	180	228	Motif-0
GhiIQD02	229	255	Motif-6
GhiIQD02	297	329	Motif-3
GhiIQD02	529	646	Motif-7
GhiIQD02	743	785	Motif-1
GhiIQD41	3	33	Motif-5
GhiIQD41	57	105	Motif-4
GhiIQD41	108	156	Motif-0
GhiIQD41	157	186	Motif-6
GhiIQD41	208	245	Motif-2
GhiIQD41	246	274	Motif-3
GhiIQD41	281	310	Motif-9
GhiIQD41	376	417	Motif-1
GhiIQD41	419	453	Motif-10
GhiIQD14	1	32	Motif-5
GhiIQD14	154	202	Motif-0
GhiIQD14	271	302	Motif-3
GhiIQD14	585	702	Motif-7
GhiIQD14	805	847	Motif-1
GhiIQD66	1	32	Motif-5
GhiIQD66	154	202	Motif-0
GhiIQD66	271	302	Motif-3
GhiIQD66	585	702	Motif-7
GhiIQD66	805	846	Motif-1
GhiIQD76	3	33	Motif-5
GhiIQD76	86	134	Motif-4
GhiIQD76	137	185	Motif-0
GhiIQD76	186	220	Motif-6
GhiIQD76	243	280	Motif-2
GhiIQD76	286	315	Motif-3
GhiIQD76	321	350	Motif-9
GhiIQD76	410	450	Motif-1
GhiIQD76	454	488	Motif-10
GhiIQD25	3	33	Motif-5
GhiIQD25	86	134	Motif-4
GhiIQD25	137	185	Motif-0
GhiIQD25	186	220	Motif-6
GhiIQD25	243	279	Motif-2
GhiIQD25	286	315	Motif-3
GhiIQD25	321	350	Motif-9
GhiIQD25	409	445	Motif-1
GhiIQD25	453	487	Motif-10
GhiIQD90	3	33	Motif-5
GhiIQD90	74	108	Motif-4
GhiIQD90	126	174	Motif-0
GhiIQD90	175	205	Motif-6
GhiIQD90	229	266	Motif-2
GhiIQD90	273	305	Motif-3
GhiIQD90	308	337	Motif-9
GhiIQD90	407	448	Motif-1
GhiIQD90	450	484	Motif-10
GhiIQD40	3	33	Motif-5
GhiIQD40	74	108	Motif-4
GhiIQD40	126	174	Motif-0
GhiIQD40	175	205	Motif-6
GhiIQD40	229	265	Motif-2
GhiIQD40	273	305	Motif-3
GhiIQD40	308	337	Motif-9
GhiIQD40	407	448	Motif-1
GhiIQD40	450	484	Motif-10
GhiIQD42	3	33	Motif-5
GhiIQD42	82	127	Motif-4
GhiIQD42	138	186	Motif-0
GhiIQD42	187	211	Motif-6
GhiIQD42	242	279	Motif-2
GhiIQD42	286	317	Motif-3
GhiIQD42	321	350	Motif-9
GhiIQD42	395	435	Motif-1
GhiIQD42	439	458	Motif-10
GhiIQD92	3	33	Motif-5
GhiIQD92	81	126	Motif-4
GhiIQD92	137	185	Motif-0
GhiIQD92	186	210	Motif-6
GhiIQD92	241	278	Motif-2
GhiIQD92	285	316	Motif-3
GhiIQD92	320	349	Motif-9
GhiIQD92	394	434	Motif-1
GhiIQD92	438	457	Motif-10
GhiIQD93	2	32	Motif-5
GhiIQD93	62	110	Motif-4
GhiIQD93	113	161	Motif-0
GhiIQD93	162	192	Motif-6
GhiIQD93	210	247	Motif-2
GhiIQD93	266	300	Motif-3
GhiIQD93	333	375	Motif-1
GhiIQD43	2	32	Motif-5
GhiIQD43	62	110	Motif-4
GhiIQD43	113	161	Motif-0
GhiIQD43	162	193	Motif-6
GhiIQD43	210	247	Motif-2
GhiIQD43	266	299	Motif-3
GhiIQD43	333	375	Motif-1
GhiIQD71	1	32	Motif-5
GhiIQD71	67	115	Motif-4
GhiIQD71	124	172	Motif-0
GhiIQD71	173	205	Motif-6
GhiIQD71	216	245	Motif-9
GhiIQD71	307	344	Motif-1
GhiIQD21	1	32	Motif-5
GhiIQD21	67	115	Motif-4
GhiIQD21	124	172	Motif-0
GhiIQD21	173	205	Motif-6
GhiIQD21	216	245	Motif-9
GhiIQD21	307	344	Motif-1
GhiIQD99	1	32	Motif-5
GhiIQD99	71	119	Motif-0
GhiIQD99	120	154	Motif-6
GhiIQD99	159	196	Motif-2
GhiIQD99	214	248	Motif-3
GhiIQD99	321	358	Motif-1
GhiIQD56	1	31	Motif-5
GhiIQD56	65	113	Motif-4
GhiIQD56	121	169	Motif-0
GhiIQD56	170	204	Motif-6
GhiIQD56	214	243	Motif-9
GhiIQD56	306	348	Motif-1
GhiIQD09	1	30	Motif-5
GhiIQD09	54	102	Motif-4
GhiIQD09	110	158	Motif-0
GhiIQD09	159	189	Motif-6
GhiIQD09	214	241	Motif-9
GhiIQD09	303	345	Motif-1
GhiIQD09	365	387	Motif-6
GhiIQD61	1	30	Motif-5
GhiIQD61	54	102	Motif-4
GhiIQD61	110	158	Motif-0
GhiIQD61	159	189	Motif-6
GhiIQD61	214	241	Motif-9
GhiIQD61	303	345	Motif-1
GhiIQD07	1	30	Motif-5
GhiIQD07	75	123	Motif-4
GhiIQD07	143	191	Motif-0
GhiIQD07	192	224	Motif-6
GhiIQD07	288	317	Motif-9
GhiIQD07	360	380	Motif-9
GhiIQD07	392	434	Motif-1
GhiIQD72	1	32	Motif-5
GhiIQD72	93	141	Motif-0
GhiIQD72	142	176	Motif-6
GhiIQD72	181	218	Motif-2
GhiIQD72	238	272	Motif-3
GhiIQD72	351	391	Motif-1
GhiIQD05	1	31	Motif-5
GhiIQD05	65	113	Motif-4
GhiIQD05	121	169	Motif-0
GhiIQD05	170	204	Motif-6
GhiIQD05	214	243	Motif-9
GhiIQD05	306	348	Motif-1
GhiIQD79	1	30	Motif-5
GhiIQD79	70	118	Motif-0
GhiIQD79	119	153	Motif-6
GhiIQD79	158	195	Motif-2
GhiIQD79	213	247	Motif-3
GhiIQD79	278	306	Motif-3
GhiIQD79	324	366	Motif-1
GhiIQD57	1	30	Motif-5
GhiIQD57	76	124	Motif-4
GhiIQD57	144	192	Motif-0
GhiIQD57	193	225	Motif-6
GhiIQD57	289	318	Motif-9
GhiIQD57	361	381	Motif-9
GhiIQD57	393	435	Motif-1
GhiIQD28	1	30	Motif-5
GhiIQD28	70	118	Motif-0
GhiIQD28	119	153	Motif-6
GhiIQD28	158	195	Motif-2
GhiIQD28	213	247	Motif-3
GhiIQD28	278	306	Motif-3
GhiIQD28	324	366	Motif-1
GhiIQD22	1	32	Motif-5
GhiIQD22	93	141	Motif-0
GhiIQD22	142	176	Motif-6
GhiIQD22	181	217	Motif-2
GhiIQD22	238	272	Motif-3
GhiIQD22	351	390	Motif-1
GhiIQD24	2	32	Motif-5
GhiIQD24	60	108	Motif-4
GhiIQD24	111	159	Motif-0
GhiIQD24	160	190	Motif-6
GhiIQD24	208	231	Motif-2
GhiIQD24	267	301	Motif-3
GhiIQD24	331	372	Motif-1
GhiIQD11	1	31	Motif-5
GhiIQD11	70	118	Motif-4
GhiIQD11	126	174	Motif-0
GhiIQD11	175	207	Motif-6
GhiIQD11	230	259	Motif-9
GhiIQD11	282	309	Motif-3
GhiIQD11	323	364	Motif-1
GhiIQD63	1	31	Motif-5
GhiIQD63	70	118	Motif-4
GhiIQD63	126	174	Motif-0
GhiIQD63	175	208	Motif-6
GhiIQD63	230	259	Motif-9
GhiIQD63	282	309	Motif-3
GhiIQD63	323	364	Motif-1
GhiIQD74	2	32	Motif-5
GhiIQD74	60	108	Motif-4
GhiIQD74	111	159	Motif-0
GhiIQD74	160	190	Motif-6
GhiIQD74	208	231	Motif-2
GhiIQD74	267	301	Motif-3
GhiIQD74	331	371	Motif-1
GhiIQD27	1	32	Motif-5
GhiIQD27	69	117	Motif-4
GhiIQD27	123	167	Motif-0
GhiIQD27	193	221	Motif-9
GhiIQD27	286	327	Motif-1
GhiIQD10	1	31	Motif-5
GhiIQD10	96	144	Motif-0
GhiIQD10	145	178	Motif-6
GhiIQD10	184	221	Motif-2
GhiIQD10	231	265	Motif-3
GhiIQD80	1	30	Motif-5
GhiIQD80	97	145	Motif-0
GhiIQD80	146	180	Motif-6
GhiIQD80	185	222	Motif-2
GhiIQD80	232	266	Motif-3
GhiIQD62	1	31	Motif-5
GhiIQD62	97	145	Motif-0
GhiIQD62	146	179	Motif-6
GhiIQD62	185	222	Motif-2
GhiIQD62	232	266	Motif-3
GhiIQD29	1	30	Motif-5
GhiIQD29	97	145	Motif-0
GhiIQD29	146	180	Motif-6
GhiIQD29	185	222	Motif-2
GhiIQD29	232	266	Motif-3
GhiIQD81	1	32	Motif-5
GhiIQD81	52	100	Motif-4
GhiIQD81	109	155	Motif-0
GhiIQD81	206	242	Motif-2
GhiIQD81	321	362	Motif-1
GhiIQD19	1	31	Motif-5
GhiIQD19	42	89	Motif-4
GhiIQD19	106	154	Motif-0
GhiIQD19	155	186	Motif-6
GhiIQD19	197	234	Motif-2
GhiIQD19	318	360	Motif-1
GhiIQD69	1	31	Motif-5
GhiIQD69	42	89	Motif-4
GhiIQD69	106	154	Motif-0
GhiIQD69	155	185	Motif-6
GhiIQD69	197	234	Motif-2
GhiIQD69	318	360	Motif-1
GhiIQD78	1	32	Motif-5
GhiIQD78	69	117	Motif-4
GhiIQD78	123	167	Motif-0
GhiIQD78	193	221	Motif-9
GhiIQD78	285	326	Motif-1
GhiIQD50	1	32	Motif-5
GhiIQD50	71	119	Motif-0
GhiIQD50	120	154	Motif-6
GhiIQD50	159	196	Motif-2
GhiIQD50	214	244	Motif-3
GhiIQD77	1	31	Motif-5
GhiIQD77	96	138	Motif-4
GhiIQD77	161	209	Motif-0
GhiIQD77	210	237	Motif-6
GhiIQD77	273	303	Motif-3
GhiIQD77	312	341	Motif-9
GhiIQD77	411	453	Motif-1
GhiIQD30	1	32	Motif-5
GhiIQD30	52	100	Motif-4
GhiIQD30	109	156	Motif-0
GhiIQD30	206	241	Motif-2
GhiIQD30	321	362	Motif-1
GhiIQD67	1	32	Motif-5
GhiIQD67	68	112	Motif-4
GhiIQD67	119	164	Motif-0
GhiIQD67	168	201	Motif-6
GhiIQD67	209	246	Motif-2
GhiIQD67	257	290	Motif-3
GhiIQD94	1	31	Motif-5
GhiIQD94	54	102	Motif-4
GhiIQD94	111	158	Motif-0
GhiIQD94	201	238	Motif-2
GhiIQD94	312	353	Motif-1
GhiIQD44	1	31	Motif-5
GhiIQD44	54	102	Motif-4
GhiIQD44	111	158	Motif-0
GhiIQD44	201	238	Motif-2
GhiIQD44	312	353	Motif-1
GhiIQD32	1	26	Motif-5
GhiIQD32	47	95	Motif-4
GhiIQD32	105	152	Motif-0
GhiIQD32	154	178	Motif-6
GhiIQD32	218	248	Motif-3
GhiIQD32	258	283	Motif-9
GhiIQD32	366	408	Motif-1
GhiIQD75	1	26	Motif-5
GhiIQD75	45	93	Motif-4
GhiIQD75	104	151	Motif-0
GhiIQD75	153	179	Motif-6
GhiIQD75	216	243	Motif-3
GhiIQD75	256	285	Motif-9
GhiIQD75	365	405	Motif-1
GhiIQD37	1	32	Motif-5
GhiIQD37	54	102	Motif-4
GhiIQD37	127	175	Motif-0
GhiIQD37	176	208	Motif-6
GhiIQD37	289	330	Motif-1
GhiIQD87	1	32	Motif-5
GhiIQD87	54	102	Motif-4
GhiIQD87	127	175	Motif-0
GhiIQD87	176	208	Motif-6
GhiIQD87	289	330	Motif-1
GhiIQD12	1	31	Motif-5
GhiIQD12	98	146	Motif-0
GhiIQD12	178	215	Motif-2
GhiIQD12	233	265	Motif-3
GhiIQD12	268	305	Motif-11
GhiIQD12	342	382	Motif-1
GhiIQD64	1	31	Motif-5
GhiIQD64	98	146	Motif-0
GhiIQD64	178	215	Motif-2
GhiIQD64	233	265	Motif-3
GhiIQD64	269	310	Motif-11
GhiIQD64	342	381	Motif-1
GhiIQD20	1	30	Motif-5
GhiIQD20	77	125	Motif-0
GhiIQD20	126	160	Motif-6
GhiIQD20	167	204	Motif-2
GhiIQD20	211	245	Motif-3
GhiIQD20	247	289	Motif-11
GhiIQD17	1	29	Motif-5
GhiIQD17	96	144	Motif-0
GhiIQD17	178	214	Motif-2
GhiIQD17	233	267	Motif-3
GhiIQD17	349	380	Motif-1
GhiIQD70	1	30	Motif-5
GhiIQD70	77	125	Motif-0
GhiIQD70	126	160	Motif-6
GhiIQD70	167	204	Motif-2
GhiIQD70	215	249	Motif-3
GhiIQD70	251	293	Motif-11
GhiIQD58	1	29	Motif-5
GhiIQD58	96	144	Motif-0
GhiIQD58	178	213	Motif-2
GhiIQD58	233	267	Motif-3
GhiIQD58	349	380	Motif-1
GhiIQD23	1	32	Motif-5
GhiIQD23	115	163	Motif-0
GhiIQD23	164	198	Motif-6
GhiIQD23	232	263	Motif-3
GhiIQD23	274	296	Motif-9
GhiIQD23	546	588	Motif-1
GhiIQD73	1	32	Motif-5
GhiIQD73	115	163	Motif-0
GhiIQD73	164	198	Motif-6
GhiIQD73	232	263	Motif-3
GhiIQD73	274	299	Motif-9
GhiIQD73	545	587	Motif-1
GhiIQD35	1	29	Motif-5
GhiIQD35	64	111	Motif-0
GhiIQD35	113	147	Motif-6
GhiIQD35	152	189	Motif-2
GhiIQD35	199	233	Motif-3
GhiIQD13	1	30	Motif-5
GhiIQD13	65	108	Motif-0
GhiIQD13	114	148	Motif-6
GhiIQD13	153	190	Motif-2
GhiIQD13	200	234	Motif-3
GhiIQD89	1	30	Motif-5
GhiIQD89	118	166	Motif-0
GhiIQD89	167	201	Motif-6
GhiIQD89	235	266	Motif-3
GhiIQD89	275	299	Motif-9
GhiIQD89	663	705	Motif-1
GhiIQD39	1	30	Motif-5
GhiIQD39	118	166	Motif-0
GhiIQD39	167	201	Motif-6
GhiIQD39	235	266	Motif-3
GhiIQD39	275	299	Motif-9
GhiIQD39	663	705	Motif-1
GhiIQD65	1	30	Motif-5
GhiIQD65	65	108	Motif-0
GhiIQD65	114	148	Motif-6
GhiIQD65	153	190	Motif-2
GhiIQD65	200	234	Motif-3
GhiIQD26	1	31	Motif-5
GhiIQD26	69	117	Motif-4
GhiIQD26	134	182	Motif-0
GhiIQD26	183	213	Motif-6
GhiIQD26	246	276	Motif-3
GhiIQD85	1	29	Motif-5
GhiIQD85	64	109	Motif-0
GhiIQD85	113	147	Motif-6
GhiIQD85	152	189	Motif-2
GhiIQD85	199	233	Motif-3
GhiIQD96	1	31	Motif-5
GhiIQD96	115	163	Motif-0
GhiIQD96	164	196	Motif-6
GhiIQD96	231	265	Motif-3
GhiIQD96	446	488	Motif-1
GhiIQD95	1	31	Motif-5
GhiIQD95	38	58	Motif-9
GhiIQD95	115	163	Motif-0
GhiIQD95	164	196	Motif-6
GhiIQD95	231	263	Motif-3
GhiIQD95	298	348	Motif-7
GhiIQD95	446	488	Motif-1
GhiIQD45	1	31	Motif-5
GhiIQD45	38	58	Motif-9
GhiIQD45	115	163	Motif-0
GhiIQD45	164	196	Motif-6
GhiIQD45	231	263	Motif-3
GhiIQD45	443	485	Motif-1
GhiIQD34	1	30	Motif-5
GhiIQD34	111	159	Motif-0
GhiIQD34	160	187	Motif-6
GhiIQD34	208	236	Motif-9
GhiIQD34	272	311	Motif-1
GhiIQD46	1	31	Motif-5
GhiIQD46	113	161	Motif-0
GhiIQD46	162	193	Motif-6
GhiIQD46	229	263	Motif-3
GhiIQD46	296	340	Motif-7
GhiIQD46	444	486	Motif-1
GhiIQD84	1	30	Motif-5
GhiIQD84	111	159	Motif-0
GhiIQD84	162	187	Motif-6
GhiIQD84	210	238	Motif-9
GhiIQD84	274	313	Motif-1
GhiIQD15	31	76	Motif-0
GhiIQD15	80	111	Motif-6
GhiIQD15	121	158	Motif-2
GhiIQD15	169	202	Motif-3
GhiIQD88	3	33	Motif-5
GhiIQD88	78	126	Motif-0
GhiIQD88	173	206	Motif-3
GhiIQD88	227	266	Motif-1
GhiIQD38	3	33	Motif-5
GhiIQD38	78	126	Motif-0
GhiIQD38	129	153	Motif-6
GhiIQD38	173	206	Motif-3
GhiIQD38	227	266	Motif-1
GhiIQD49	1	31	Motif-5
GhiIQD49	76	106	Motif-1
GhiIQD49	119	167	Motif-0
GhiIQD49	168	198	Motif-6
GhiIQD49	274	316	Motif-1
GhiIQD98	1	31	Motif-5
GhiIQD98	76	106	Motif-1
GhiIQD98	119	167	Motif-0
GhiIQD98	168	198	Motif-6
GhiIQD98	274	315	Motif-1
GhiIQD01	1	29	Motif-5
GhiIQD01	70	102	Motif-0
GhiIQD01	120	154	Motif-6
GhiIQD01	159	196	Motif-2
GhiIQD01	206	239	Motif-3
GhiIQD51	1	29	Motif-5
GhiIQD51	70	103	Motif-0
GhiIQD51	120	154	Motif-6
GhiIQD51	159	196	Motif-2
GhiIQD51	206	239	Motif-3
GhiIQD48	1	31	Motif-5
GhiIQD48	46	71	Motif-0
GhiIQD48	110	157	Motif-0
GhiIQD48	159	189	Motif-6
GhiIQD48	248	278	Motif-1
GhiIQD55	1	31	Motif-5
GhiIQD55	66	112	Motif-0
GhiIQD06	1	31	Motif-5
GhiIQD06	66	107	Motif-0

## Sheet: Ghi-Motif Seq.
Genome Wide Identification, Classification and Functional Characterization Analysis of IQD gene family in Diploid and Tetraploid Cotton (Gossypium) Abdul Rehman1,2,3, Zhen Peng2, Hongge Li2, Guangyong Qin1, Yinhua Jia2，Zhaoe Pan2，Shoupu He1,2, Abdul Qayyum3 and Xiongming Du1,2*, 1Zhengzhou Research Base, State Key Laboratory of Cotton Biology, Zhengzhou University, Zhengzhou 450000, China. 2State…
DB	MotifSeq	MotifID	Length	NSites	Evalue	Bad
1	AAIKIQTAFRGYLARRALRALKGLVRLQALVRGHLVRKQAAATLRCMQA	MEME-1	49	97	0	FALSE
2	STPASSDGDDNSLNNSPSVPNYMAATZSAKAKVRSQSAPKQRP	MEME-2	43	80	0	FALSE
3	EEDWDDSPGTKEEIEAKLQRKQEAAMKRERAMAYAFSH	MEME-3	38	56	0	FALSE
4	PNPLFMDPDKPSWGWSWLERWMAARPWENRGRAES	MEME-4	35	72	0	FALSE
5	SLAETEKEQNKHAIAVAAATAAAAEAAVAAAQAAAEVVRLTSNGRGSAE	MEME-5	49	39	0	FALSE
6	MGKSGKWFSSVKKAKKSESKDKKEKSSKKKKK	MEME-6	32	96	0	FALSE
7	LVRVQARVRARRIRMSEEGQALQKKLQQKRSKEAK	MEME-7	35	77	0	FALSE
8	ISRSKEPSISENPVLNNRRGQHGGSECGTELSITSTLDSPDRSEVGTIEYENGVKVSEQENCSSNSTKDLDVKENDTIAIPVPDSSLSIANQPEKLDDSKGELANLIVADSPQVEQEP	MEME-8	118	6	6.2e-301	FALSE
9	KGQGKLRHGETNSFIPLFREPSSIEKILGEAEREHKLIFRPPTPPEQPRTPPFVPHRPASPRVPSQRIASPRVASPRAASPPRAASPRAASPPPPPP	MEME-9	97	6	4.7e-238	FALSE
10	DDEDSPKIVEIDTGKPKSRSRRRNRNSSSH	MEME-10	30	25	6.9e-187	FALSE
11	STPEKGPIGSAKKRLSYPPSPARPRRHSGPPKVDS	MEME-11	35	14	2.9e-169	FALSE
12	DQSSSKSARSNFGGEISKAYARYQLNLDKQSSKASQKPSRTSSLQSPSTPKPPSTPTRKLKSASPRSSV	MEME-12	69	10	4.7e-181	FALSE

## Sheet: Gra-Motif Info
Genome Wide Identification, Classification and Functional Characterization Analysis of IQD gene family in Diploid and Tetraploid Cotton (Gossypium) Abdul Rehman1,2,3, Zhen Peng2, Hongge Li2, Guangyong Qin1, Yinhua Jia2，Zhaoe Pan2，Shoupu He1,2, Abdul Qayyum3 and Xiongming Du1,2*, 1Zhengzhou Research Base, State Key Laboratory of Cotton Biology, Zhengzhou University, Zhengzhou 450000, China. 2State…
GraIQD04	1	32	Motif-5
GraIQD04	65	96	Motif-4
GraIQD04	120	168	Motif-0
GraIQD04	169	193	Motif-6
GraIQD04	207	246	Motif-2
GraIQD04	253	287	Motif-3
GraIQD04	294	341	Motif-9
GraIQD04	383	426	Motif-1
GraIQD04	429	462	Motif-8
GraIQD48	1	31	Motif-5
GraIQD48	115	163	Motif-0
GraIQD48	164	188	Motif-6
GraIQD48	228	262	Motif-3
GraIQD48	266	365	Motif-10
GraIQD48	377	441	Motif-11
GraIQD48	445	488	Motif-1
GraIQD36	1	31	Motif-5
GraIQD36	89	115	Motif-4
GraIQD36	138	186	Motif-0
GraIQD36	187	211	Motif-6
GraIQD36	225	264	Motif-2
GraIQD36	271	305	Motif-3
GraIQD36	313	360	Motif-9
GraIQD36	403	446	Motif-1
GraIQD36	448	481	Motif-8
GraIQD45	11	42	Motif-5
GraIQD45	69	110	Motif-4
GraIQD45	121	169	Motif-0
GraIQD45	170	194	Motif-6
GraIQD45	210	249	Motif-2
GraIQD45	256	290	Motif-3
GraIQD45	296	343	Motif-9
GraIQD45	390	430	Motif-1
GraIQD20	1	32	Motif-5
GraIQD20	55	78	Motif-4
GraIQD20	109	157	Motif-0
GraIQD20	158	182	Motif-6
GraIQD20	196	235	Motif-2
GraIQD20	242	276	Motif-3
GraIQD20	282	329	Motif-9
GraIQD20	373	416	Motif-1
GraIQD20	418	451	Motif-8
GraIQD07	1	32	Motif-5
GraIQD07	109	157	Motif-0
GraIQD07	158	182	Motif-6
GraIQD07	196	235	Motif-2
GraIQD07	242	276	Motif-3
GraIQD07	281	327	Motif-9
GraIQD07	371	414	Motif-1
GraIQD07	416	449	Motif-8
GraIQD47	1	31	Motif-5
GraIQD47	115	163	Motif-0
GraIQD47	164	188	Motif-6
GraIQD47	228	261	Motif-3
GraIQD47	266	365	Motif-10
GraIQD47	377	441	Motif-11
GraIQD47	445	487	Motif-1
GraIQD41	1	31	Motif-5
GraIQD41	45	109	Motif-11
GraIQD41	151	199	Motif-0
GraIQD41	200	223	Motif-6
GraIQD41	247	286	Motif-2
GraIQD41	291	322	Motif-3
GraIQD41	404	447	Motif-1
GraIQD21	1	32	Motif-5
GraIQD21	44	108	Motif-11
GraIQD21	176	224	Motif-0
GraIQD21	225	248	Motif-6
GraIQD21	267	306	Motif-2
GraIQD21	308	337	Motif-3
GraIQD21	415	458	Motif-1
GraIQD17	1	32	Motif-5
GraIQD17	45	109	Motif-11
GraIQD17	162	210	Motif-0
GraIQD17	211	235	Motif-6
GraIQD17	257	296	Motif-2
GraIQD17	304	336	Motif-3
GraIQD17	423	466	Motif-1
GraIQD09	1	31	Motif-5
GraIQD09	67	109	Motif-4
GraIQD09	121	169	Motif-0
GraIQD09	170	194	Motif-6
GraIQD09	214	278	Motif-7
GraIQD09	305	348	Motif-1
GraIQD26	3	34	Motif-5
GraIQD26	57	99	Motif-4
GraIQD26	106	154	Motif-0
GraIQD26	155	178	Motif-6
GraIQD26	208	247	Motif-2
GraIQD26	376	418	Motif-1
GraIQD26	420	453	Motif-8
GraIQD24	1	30	Motif-5
GraIQD24	118	165	Motif-0
GraIQD24	167	190	Motif-6
GraIQD24	232	264	Motif-3
GraIQD24	287	386	Motif-10
GraIQD24	662	705	Motif-1
GraIQD29	1	31	Motif-5
GraIQD29	56	98	Motif-4
GraIQD29	110	158	Motif-0
GraIQD29	159	183	Motif-6
GraIQD29	215	279	Motif-7
GraIQD29	302	345	Motif-1
GraIQD18	1	30	Motif-5
GraIQD18	97	145	Motif-0
GraIQD18	146	170	Motif-6
GraIQD18	184	223	Motif-2
GraIQD18	229	263	Motif-3
GraIQD18	283	347	Motif-11
GraIQD30	1	31	Motif-5
GraIQD30	50	77	Motif-4
GraIQD30	97	145	Motif-0
GraIQD30	146	169	Motif-6
GraIQD30	184	223	Motif-2
GraIQD30	229	263	Motif-3
GraIQD30	283	347	Motif-11
GraIQD34	1	32	Motif-5
GraIQD34	41	97	Motif-10
GraIQD34	154	201	Motif-0
GraIQD34	203	224	Motif-6
GraIQD34	269	301	Motif-3
GraIQD34	367	464	Motif-10
GraIQD34	583	647	Motif-7
GraIQD34	805	847	Motif-1
GraIQD31	1	32	Motif-5
GraIQD31	72	114	Motif-4
GraIQD31	126	174	Motif-0
GraIQD31	175	199	Motif-6
GraIQD31	231	293	Motif-7
GraIQD31	322	365	Motif-1
GraIQD01	1	32	Motif-5
GraIQD01	69	111	Motif-4
GraIQD01	124	172	Motif-0
GraIQD01	173	196	Motif-6
GraIQD01	216	280	Motif-7
GraIQD01	306	344	Motif-1
GraIQD28	2	32	Motif-5
GraIQD28	64	106	Motif-4
GraIQD28	113	161	Motif-0
GraIQD28	162	186	Motif-6
GraIQD28	209	248	Motif-2
GraIQD28	263	297	Motif-3
GraIQD28	332	375	Motif-1
GraIQD03	1	32	Motif-5
GraIQD03	115	163	Motif-0
GraIQD03	164	188	Motif-6
GraIQD03	229	261	Motif-3
GraIQD03	284	381	Motif-10
GraIQD03	544	587	Motif-1
GraIQD13	3	33	Motif-5
GraIQD13	88	130	Motif-4
GraIQD13	137	185	Motif-0
GraIQD13	186	210	Motif-6
GraIQD13	242	280	Motif-2
GraIQD13	283	306	Motif-3
GraIQD13	409	451	Motif-1
GraIQD13	454	487	Motif-8
GraIQD25	3	33	Motif-5
GraIQD25	76	105	Motif-4
GraIQD25	126	174	Motif-0
GraIQD25	175	197	Motif-6
GraIQD25	228	267	Motif-2
GraIQD25	270	300	Motif-3
GraIQD25	311	341	Motif-9
GraIQD25	406	449	Motif-1
GraIQD25	450	483	Motif-8
GraIQD50	1	32	Motif-5
GraIQD50	71	119	Motif-0
GraIQD50	120	144	Motif-6
GraIQD50	158	197	Motif-2
GraIQD50	211	244	Motif-3
GraIQD50	320	360	Motif-1
GraIQD14	1	31	Motif-5
GraIQD14	71	113	Motif-4
GraIQD14	134	182	Motif-0
GraIQD14	241	273	Motif-3
GraIQD14	288	335	Motif-9
GraIQD14	381	424	Motif-1
GraIQD10	1	30	Motif-5
GraIQD10	78	120	Motif-4
GraIQD10	144	192	Motif-0
GraIQD10	193	215	Motif-6
GraIQD10	294	341	Motif-9
GraIQD10	392	435	Motif-1
GraIQD27	3	33	Motif-5
GraIQD27	83	121	Motif-4
GraIQD27	137	185	Motif-0
GraIQD27	186	207	Motif-6
GraIQD27	240	278	Motif-2
GraIQD27	282	309	Motif-3
GraIQD27	393	435	Motif-1
GraIQD27	437	459	Motif-8
GraIQD02	1	32	Motif-5
GraIQD02	93	141	Motif-0
GraIQD02	142	166	Motif-6
GraIQD02	180	219	Motif-2
GraIQD02	235	267	Motif-3
GraIQD02	350	391	Motif-1
GraIQD16	1	31	Motif-5
GraIQD16	70	118	Motif-0
GraIQD16	119	143	Motif-6
GraIQD16	157	196	Motif-2
GraIQD16	210	243	Motif-3
GraIQD16	323	366	Motif-1
GraIQD11	2	32	Motif-5
GraIQD11	62	104	Motif-4
GraIQD11	111	159	Motif-0
GraIQD11	160	183	Motif-6
GraIQD11	207	231	Motif-2
GraIQD11	264	298	Motif-3
GraIQD11	330	372	Motif-1
GraIQD37	25	56	Motif-5
GraIQD37	163	209	Motif-0
GraIQD37	212	235	Motif-6
GraIQD37	260	291	Motif-3
GraIQD37	401	465	Motif-7
GraIQD37	540	568	Motif-5
GraIQD37	603	646	Motif-1
GraIQD19	1	32	Motif-5
GraIQD19	54	96	Motif-4
GraIQD19	109	156	Motif-0
GraIQD19	205	244	Motif-2
GraIQD19	320	362	Motif-1
GraIQD38	1	31	Motif-5
GraIQD38	44	85	Motif-4
GraIQD38	106	154	Motif-0
GraIQD38	155	179	Motif-6
GraIQD38	196	234	Motif-2
GraIQD38	317	360	Motif-1
GraIQD06	1	32	Motif-5
GraIQD06	180	227	Motif-0
GraIQD06	229	250	Motif-6
GraIQD06	294	325	Motif-3
GraIQD06	526	590	Motif-7
GraIQD06	742	784	Motif-1
GraIQD46	1	32	Motif-5
GraIQD46	56	98	Motif-4
GraIQD46	111	159	Motif-0
GraIQD46	200	238	Motif-2
GraIQD46	311	354	Motif-1
GraIQD35	1	32	Motif-5
GraIQD35	69	110	Motif-4
GraIQD35	118	163	Motif-0
GraIQD35	167	190	Motif-6
GraIQD35	207	246	Motif-2
GraIQD35	253	286	Motif-3
GraIQD15	1	32	Motif-5
GraIQD15	71	113	Motif-4
GraIQD15	123	167	Motif-0
GraIQD15	196	236	Motif-7
GraIQD15	284	326	Motif-1
GraIQD43	1	32	Motif-5
GraIQD43	56	98	Motif-4
GraIQD43	127	175	Motif-0
GraIQD43	176	200	Motif-6
GraIQD43	288	331	Motif-1
GraIQD32	1	32	Motif-5
GraIQD32	98	146	Motif-0
GraIQD32	147	170	Motif-6
GraIQD32	177	214	Motif-2
GraIQD32	230	262	Motif-3
GraIQD32	341	372	Motif-1
GraIQD12	1	29	Motif-5
GraIQD12	47	89	Motif-4
GraIQD12	104	151	Motif-0
GraIQD12	153	174	Motif-6
GraIQD12	213	238	Motif-3
GraIQD12	261	285	Motif-9
GraIQD12	364	407	Motif-1
GraIQD44	1	30	Motif-5
GraIQD44	96	144	Motif-0
GraIQD44	145	168	Motif-6
GraIQD44	177	215	Motif-2
GraIQD44	230	264	Motif-3
GraIQD44	348	374	Motif-1
GraIQD39	1	31	Motif-5
GraIQD39	77	125	Motif-0
GraIQD39	126	150	Motif-6
GraIQD39	166	205	Motif-2
GraIQD39	212	246	Motif-3
GraIQD33	1	30	Motif-5
GraIQD33	65	108	Motif-0
GraIQD33	114	137	Motif-6
GraIQD33	152	191	Motif-2
GraIQD33	197	231	Motif-3
GraIQD40	1	29	Motif-5
GraIQD40	64	109	Motif-0
GraIQD40	113	137	Motif-6
GraIQD40	151	190	Motif-2
GraIQD40	196	230	Motif-3
GraIQD23	3	33	Motif-5
GraIQD23	78	126	Motif-0
GraIQD23	166	197	Motif-3
GraIQD23	222	261	Motif-1
GraIQD49	1	31	Motif-5
GraIQD49	75	110	Motif-1
GraIQD49	119	167	Motif-0
GraIQD49	168	192	Motif-6
GraIQD49	273	315	Motif-1
GraIQD05	1	30	Motif-5
GraIQD05	70	103	Motif-0
GraIQD05	120	144	Motif-6
GraIQD05	158	197	Motif-2
GraIQD05	203	236	Motif-3
GraIQD22	1	31	Motif-5
GraIQD22	143	183	Motif-0
GraIQD22	192	214	Motif-6
GraIQD22	303	345	Motif-1
GraIQD42	1	32	Motif-5
GraIQD42	74	100	Motif-4
GraIQD42	120	164	Motif-0
GraIQD42	256	296	Motif-1
GraIQD08	1	32	Motif-5
GraIQD08	66	114	Motif-0

## Sheet: Gra-Motif Seq.
Genome Wide Identification, Classification and Functional Characterization Analysis of IQD gene family in Diploid and Tetraploid Cotton (Gossypium) Abdul Rehman1,2,3, Zhen Peng2, Hongge Li2, Guangyong Qin1, Yinhua Jia2，Zhaoe Pan2，Shoupu He1,2, Abdul Qayyum3 and Xiongming Du1,2*, 1Zhengzhou Research Base, State Key Laboratory of Cotton Biology, Zhengzhou University, Zhengzhou 450000, China. 2State…
DB	MotifSeq	MotifID	Length	NSites	Evalue	Bad
1	AAIKIQTAFRGYLARRALRALKGLVRLQALVRGHLVRKQAAATLRCMQA	MEME-1	49	49	0	FALSE
2	PSTPASSDGDDSSSNSSPSVPNYMAATZSAKAKVRSQSAPKQRP	MEME-2	44	40	0	FALSE
3	MEEDWDDSPGTKEEIEAKLQSKQEAAMKRERAMAYAFSHQ	MEME-3	40	28	0	FALSE
4	SRSPNPLFMDPDKPSWGWSWLERWMAARPWESRLM	MEME-4	35	32	0	FALSE
5	AETEKEQNKHAIAVAAATAAAAEAAVAAAQAAAEVVRLTSAGR	MEME-5	43	19	2.6e-295	FALSE
6	MGKSGKWFSSVKKAKKSESKDKKEKSSSKKKK	MEME-6	32	50	9.4e-239	FALSE
7	LVRVQARVRARRVRMSEENQALQKK	MEME-7	25	43	4.9e-222	FALSE
8	ADDSSRSKEPSITENPVLRSRRTQTALSECGDDLSYQTTLSSPPRSEPGRLSYPHGQKVSELENC	MEME-8	65	7	3.4e-55	FALSE
9	STPEKDPIGSAKKRLSYPPSPARPRRHSYPPKVD	MEME-9	34	7	4.2e-41	FALSE
10	DDQSSVKSGRSNFGGEISKAYARYQLNLDKQSSKASQKPSRTSSLQSP	MEME-10	48	7	1.4e-30	FALSE
11	SGKTKLSVQKJREAPAVNGSSHSTLEYEKNKRGLRRVSSNSAADSVRENPQNELEKVKRNLRKLHNPVKEVSLKSEFENEKTKKTLKKTSSSNNPDVEEQ	MEME-11	100	5	2.5e-28	FALSE
12	HGETNSIJPAFRKPSSIEKILGEAEREPGLSFRPPTPPEQPKTPPFVEERNASPEKPSDRPASPR	MEME-12	65	7	3e-35	FALSE
